# Supplementary material for: Identification of key genes in bovine muscle development by co-expression analysis
Source: PeerJ. 2023 Apr 12;11:e15093. doi: 10.7717/peerj.15093 (PMC10105563; doi:10.7717/peerj.15093)
Supplement: Supplemental Information 1 [file peerj-11-15093-s001.xlsx]

## Sheet: cell-MyoG
Well	Fluor	Target	Content	Sample	Cq
A01	SYBR	MyoG	Unkn	GM1	26.41	26.4333	17.8767	5.47333	8.55667	8.81111	-3.33778	-0.254444	10.1105	1.19288	1.15773e-05
B01	SYBR	MyoG	Unkn	GM1	26.29	26.6833	17.5467	5.34667	9.13667		-3.46444	0.325556	11.0383	0.797991
C01	SYBR	MyoG	Unkn	GM1	26.6	26.18	17.44	5.49	8.74		-3.32111	-0.0711111	9.99434	1.05053
D01	SYBR	MyoG	Unkn	GM2	27.08	23.8533	18.38	3.87333			-4.93778		30.6492	1.19288	3.34464e-05
E01	SYBR	MyoG	Unkn	GM2	26.31	23.88	18.5333	3.92			-4.89111		29.6737	0.797991
F01	SYBR	MyoG	Unkn	GM2	26.66	23.9767	18.4867	4.1			-4.71111		26.193	1.05053
A02	SYBR	MyoG	Unkn	GM3	26.3	23.26	19.3867	3.75667			-5.05444		33.2307	1.19288	0.00138991
B02	SYBR	MyoG	Unkn	GM3	26.14	23.2733	19.3533	3.43333			-5.37778		41.5788	0.797991
C02	SYBR	MyoG	Unkn	GM3	26.1	23.43	19.33	4.04667			-4.76444		27.1795	1.05053
D02	SYBR	MyoG	Unkn	DM1-1	24	23.5	19.7433	4.31333			-4.49778		22.5926	1.19288	0.000362504
E02	SYBR	MyoG	Unkn	DM1-1	23.75	23.1167	19.6833	4.14667			-4.66444		25.3593	0.797991
F02	SYBR	MyoG	Unkn	DM1-1	23.81	23.21	19.1633	4.57667			-4.23444		18.8233	1.05053
A03	SYBR	MyoG	Unkn	DM1-2	23.92	22.89	18.5767	5.05333			-3.75778		13.5271	1.19288	0.000649325
B03	SYBR	MyoG	Unkn	DM1-2	23.81	23.01	18.8633	5.36667			-3.44444		10.8863	0.797991
C03	SYBR	MyoG	Unkn	DM1-2	23.91	23.1167	18.54	5.5			-3.31111		9.9253	1.05053
D03	SYBR	MyoG	Unkn	DM1-3	24	24.1	19.0467
E03	SYBR	MyoG	Unkn	DM1-3	23.83	24.2733	18.9067
F03	SYBR	MyoG	Unkn	DM1-3	24.1	24.37	18.87
A04	SYBR	MyoG	Unkn	DM2-1	23.35
B04	SYBR	MyoG	Unkn	DM2-1	23.29
C04	SYBR	MyoG	Unkn	DM2-1	23.14
D04	SYBR	MyoG	Unkn	DM2-2	23.31
E04	SYBR	MyoG	Unkn	DM2-2	23.24
F04	SYBR	MyoG	Unkn	DM2-2	23.27
A05	SYBR	MyoG	Unkn	DM2-3	23.43
B05	SYBR	MyoG	Unkn	DM2-3	23.47			1.19288	0.797991	1.05053	10.1105	11.0383	9.99434	30.6492	29.6737	26.193	33.2307	41.5788	27.1795	22.5926	25.3593	18.8233	13.5271	10.8863	9.9253
C05	SYBR	MyoG	Unkn	DM2-3	23.39
D05	SYBR	MyoG	Unkn	DM3-1	23.51
E05	SYBR	MyoG	Unkn	DM3-1	23.33
F05	SYBR	MyoG	Unkn	DM3-1	23.66
A06	SYBR	MyoG	Unkn	DM3-2	23.24
B06	SYBR	MyoG	Unkn	DM3-2	23.11
C06	SYBR	MyoG	Unkn	DM3-2	23
D06	SYBR	MyoG	Unkn	DM3-3	23.24
E06	SYBR	MyoG	Unkn	DM3-3	23.13
F06	SYBR	MyoG	Unkn	DM3-3	23.26
A07	SYBR	MyoG	Unkn	DM4-1	23.06
B07	SYBR	MyoG	Unkn	DM4-1	22.79
C07	SYBR	MyoG	Unkn	DM4-1	22.82
D07	SYBR	MyoG	Unkn	DM4-2	22.88
E07	SYBR	MyoG	Unkn	DM4-2	23.02
F07	SYBR	MyoG	Unkn	DM4-2	23.13
A08	SYBR	MyoG	Unkn	DM4-3	23.32
B08	SYBR	MyoG	Unkn	DM4-3	23.11
C08	SYBR	MyoG	Unkn	DM4-3	22.92
D08	SYBR	MyoG	Unkn	DM5-1	24.21
E08	SYBR	MyoG	Unkn	DM5-1	23.95
F08	SYBR	MyoG	Unkn	DM5-1	24.14
A09	SYBR	MyoG	Unkn	DM5-2	24.32
B09	SYBR	MyoG	Unkn	DM5-2	24.28
C09	SYBR	MyoG	Unkn	DM5-2	24.22
D09	SYBR	MyoG	Unkn	DM5-3	24.27
E09	SYBR	MyoG	Unkn	DM5-3	24.42
F09	SYBR	MyoG	Unkn	DM5-3	24.42

## Sheet: cell-MyHC
Well	Fluor	Target	Content	Sample	Cq
A01	SYBR	MyHC	Unkn	GM1	34.15	34.42	17.8767	13.3967	16.5433	16.9111	-3.51444	-0.367778	11.4276	1.29036	7.06937e-05
B01	SYBR	MyHC	Unkn	GM1	34.82	34.7233	17.5467	13.1633	17.1767		-3.74778	0.265556	13.4336	0.831878
C01	SYBR	MyHC	Unkn	GM1	34.29	34.4533	17.44	13.1567	17.0133		-3.75444	0.102222	13.4959	0.931597
D01	SYBR	MyHC	Unkn	GM2	35.62	31.7767	18.38	10.7067			-6.20444		73.7435	1.29036	0.00304893
E01	SYBR	MyHC	Unkn	GM2	33.2	31.6967	18.5333	11.3067			-5.60444		48.6526	0.831878
F01	SYBR	MyHC	Unkn	GM2	35.35	31.6433	18.4867	11.3567			-5.55444		46.9953	0.931597
A02	SYBR	MyHC	Unkn	GM3	34.51	30.0933	19.3867	8.65			-8.26111		306.791	1.29036	0.00189784
B02	SYBR	MyHC	Unkn	GM3	34.58	30.66	19.3533	8.56			-8.35111		326.539	0.831878
C02	SYBR	MyHC	Unkn	GM3	34.27	30.6867	19.33	9.24333			-7.66778		203.344	0.931597
D02	SYBR	MyHC	Unkn	DM1-1	31.71	28.3933	19.7433	8.73667			-8.17444		288.904	1.29036	0.00217593
E02	SYBR	MyHC	Unkn	DM1-1	31.77	28.2433	19.6833	8.31667			-8.59444		386.532	0.831878
F02	SYBR	MyHC	Unkn	DM1-1	31.85	28.4067	19.1633	9.01			-7.90111		239.04	0.931597
A03	SYBR	MyHC	Unkn	DM1-2	31.76	27.3133	18.5767	7.65333			-9.25778		612.165	1.29036	0.00268856
B03	SYBR	MyHC	Unkn	DM1-2	32.12	27.18	18.8633	8.28			-8.63111		396.482	0.831878
C03	SYBR	MyHC	Unkn	DM1-2	31.21	27.55	18.54	8.25667			-8.65444		402.946	0.931597
D03	SYBR	MyHC	Unkn	DM1-3	31.58	26.7	19.0467
E03	SYBR	MyHC	Unkn	DM1-3	31.71	27.1867	18.9067
F03	SYBR	MyHC	Unkn	DM1-3	31.64	27.1267	18.87
A04	SYBR	MyHC	Unkn	DM2-1	30.05
B04	SYBR	MyHC	Unkn	DM2-1	29.89
C04	SYBR	MyHC	Unkn	DM2-1	30.34
D04	SYBR	MyHC	Unkn	DM2-2	30.42
E04	SYBR	MyHC	Unkn	DM2-2	30.91
F04	SYBR	MyHC	Unkn	DM2-2	30.65
A05	SYBR	MyHC	Unkn	DM2-3	30.44
B05	SYBR	MyHC	Unkn	DM2-3	31.12		1.29036	0.831878	0.931597	11.4276	13.4336	13.4959	73.7435	48.6526	46.9953	306.791	326.539	203.344	288.904	386.532	239.04	612.165	396.482	402.946
C05	SYBR	MyHC	Unkn	DM2-3	30.5
D05	SYBR	MyHC	Unkn	DM3-1	28.28
E05	SYBR	MyHC	Unkn	DM3-1	28.43
F05	SYBR	MyHC	Unkn	DM3-1	28.47
A06	SYBR	MyHC	Unkn	DM3-2	28.31
B06	SYBR	MyHC	Unkn	DM3-2	28.28
C06	SYBR	MyHC	Unkn	DM3-2	28.14
D06	SYBR	MyHC	Unkn	DM3-3	28.66
E06	SYBR	MyHC	Unkn	DM3-3	28.41
F06	SYBR	MyHC	Unkn	DM3-3	28.15
A07	SYBR	MyHC	Unkn	DM4-1	27.31
B07	SYBR	MyHC	Unkn	DM4-1	27.41
C07	SYBR	MyHC	Unkn	DM4-1	27.22
D07	SYBR	MyHC	Unkn	DM4-2	27.17
E07	SYBR	MyHC	Unkn	DM4-2	27.16
F07	SYBR	MyHC	Unkn	DM4-2	27.21
A08	SYBR	MyHC	Unkn	DM4-3	27.64
B08	SYBR	MyHC	Unkn	DM4-3	27.52
C08	SYBR	MyHC	Unkn	DM4-3	27.49
D08	SYBR	MyHC	Unkn	DM5-1	26.61
E08	SYBR	MyHC	Unkn	DM5-1	26.66
F08	SYBR	MyHC	Unkn	DM5-1	26.83
A09	SYBR	MyHC	Unkn	DM5-2	27.65
B09	SYBR	MyHC	Unkn	DM5-2	26.82
C09	SYBR	MyHC	Unkn	DM5-2	27.09
D09	SYBR	MyHC	Unkn	DM5-3	27.07
E09	SYBR	MyHC	Unkn	DM5-3	27.19
F09	SYBR	MyHC	Unkn	DM5-3	27.12

## Sheet: cell-Atp2a1
Well	Fluor	Target	Content	Sample	Cq
A01	SYBR	Atp2a1	Unkn	GM1	27.9	28.2667	17.8767	7.63667	10.39	10.5656	-2.92889	-0.175556	7.61524	1.1294	0.000508344
B01	SYBR	Atp2a1	Unkn	GM1	28.2	28.29	17.5467	7.39667	10.7433		-3.16889	0.177778	8.99354	0.884064
C01	SYBR	Atp2a1	Unkn	GM1	28.7	28.0033	17.44	7.81333	10.5633		-2.75222	-0.00222222	6.73754	1.00154
D01	SYBR	Atp2a1	Unkn	GM2	28.3	26.0167	18.38	5.80333			-4.76222		27.1376	1.1294	4.09112e-05
E01	SYBR	Atp2a1	Unkn	GM2	28.09	25.93	18.5333	6.05			-4.51556		22.8727	0.884064
F01	SYBR	Atp2a1	Unkn	GM2	28.48	26.3	18.4867	5.90667			-4.65889		25.2619	1.00154
A02	SYBR	Atp2a1	Unkn	GM3	27.96	25.19	19.3867	5.12333			-5.44222		43.4783	1.1294	0.00351353
B02	SYBR	Atp2a1	Unkn	GM3	28.07	25.4033	19.3533	5.18			-5.38556		41.8036	0.884064
C02	SYBR	Atp2a1	Unkn	GM3	27.98	25.2367	19.33	5.90667			-4.65889		25.2619	1.00154
D02	SYBR	Atp2a1	Unkn	DM1-1	26.21	24.8667	19.7433	5.66667			-4.89889		29.8341	1.1294	0.000728837
E02	SYBR	Atp2a1	Unkn	DM1-1	25.85	24.8633	19.6833	5.59667			-4.96889		31.3173	0.884064
F02	SYBR	Atp2a1	Unkn	DM1-1	25.99	25.07	19.1633	6.1			-4.46556		22.0936	1.00154
A03	SYBR	Atp2a1	Unkn	DM1-2	26	24.2433	18.5767	5.15			-5.41556		42.682	1.1294	7.25763e-05
B03	SYBR	Atp2a1	Unkn	DM1-2	25.98	24.46	18.8633	5.43667			-5.12889		34.9904	0.884064
C03	SYBR	Atp2a1	Unkn	DM1-2	25.81	24.64	18.54	5.31			-5.25556		38.2015	1.00154
D03	SYBR	Atp2a1	Unkn	DM1-3	26.35	24.1967	19.0467
E03	SYBR	Atp2a1	Unkn	DM1-3	26.18	24.3433	18.9067
F03	SYBR	Atp2a1	Unkn	DM1-3	26.37	24.18	18.87
A04	SYBR	Atp2a1	Unkn	DM2-1	25.18
B04	SYBR	Atp2a1	Unkn	DM2-1	25.18
C04	SYBR	Atp2a1	Unkn	DM2-1	25.21
D04	SYBR	Atp2a1	Unkn	DM2-2	25.71
E04	SYBR	Atp2a1	Unkn	DM2-2	25.18
F04	SYBR	Atp2a1	Unkn	DM2-2	25.32		1.1294	0.884064	1.00154	7.61524	8.99354	6.73754	27.1376	22.8727	25.2619	43.4783	41.8036	25.2619	29.8341	31.3173	22.0936	42.682	34.9904	38.2015
A05	SYBR	Atp2a1	Unkn	DM2-3	25.25
B05	SYBR	Atp2a1	Unkn	DM2-3	25.26
C05	SYBR	Atp2a1	Unkn	DM2-3	25.2
D05	SYBR	Atp2a1	Unkn	DM3-1	24.96
E05	SYBR	Atp2a1	Unkn	DM3-1	24.81
F05	SYBR	Atp2a1	Unkn	DM3-1	24.83
A06	SYBR	Atp2a1	Unkn	DM3-2	25.05
B06	SYBR	Atp2a1	Unkn	DM3-2	24.86
C06	SYBR	Atp2a1	Unkn	DM3-2	24.68
D06	SYBR	Atp2a1	Unkn	DM3-3	25.09
E06	SYBR	Atp2a1	Unkn	DM3-3	25.02
F06	SYBR	Atp2a1	Unkn	DM3-3	25.1
A07	SYBR	Atp2a1	Unkn	DM4-1	24.48
B07	SYBR	Atp2a1	Unkn	DM4-1	24.18
C07	SYBR	Atp2a1	Unkn	DM4-1	24.07
D07	SYBR	Atp2a1	Unkn	DM4-2	24.61
E07	SYBR	Atp2a1	Unkn	DM4-2	24.25
F07	SYBR	Atp2a1	Unkn	DM4-2	24.52
A08	SYBR	Atp2a1	Unkn	DM4-3	24.86
B08	SYBR	Atp2a1	Unkn	DM4-3	24.65
C08	SYBR	Atp2a1	Unkn	DM4-3	24.41
D08	SYBR	Atp2a1	Unkn	DM5-1	24.16
E08	SYBR	Atp2a1	Unkn	DM5-1	24.16
F08	SYBR	Atp2a1	Unkn	DM5-1	24.27
A09	SYBR	Atp2a1	Unkn	DM5-2	24.5
B09	SYBR	Atp2a1	Unkn	DM5-2	24.27
C09	SYBR	Atp2a1	Unkn	DM5-2	24.26
D09	SYBR	Atp2a1	Unkn	DM5-3	24.14
E09	SYBR	Atp2a1	Unkn	DM5-3	24.2
F09	SYBR	Atp2a1	Unkn	DM5-3	24.2

## Sheet: cell-Lmod3
Well	Fluor	Target	Content	Sample	Cq
A01	SYBR	Lmod3	Unkn	GM1	31.01	31.4067	17.8767	9.59	13.53	13.7222	-4.13222	-0.192222	17.5357	1.14252	8.17318e-05
B01	SYBR	Lmod3	Unkn	GM1	31.32	31.5567	17.5467	9.30667	14.01		-4.41556	0.287778	21.341	0.819163
C01	SYBR	Lmod3	Unkn	GM1	31.89	31.0667	17.44	9.48	13.6267		-4.24222	-0.0955556	18.925	1.06848
D01	SYBR	Lmod3	Unkn	GM2	31.7	27.97	18.38	6.39667			-7.32556		160.403	1.14252	0.000110184
E01	SYBR	Lmod3	Unkn	GM2	31.42	27.84	18.5333	6.71333			-7.00889		128.791	0.819163
F01	SYBR	Lmod3	Unkn	GM2	31.55	27.9667	18.4867	6.60667			-7.11556		138.674	1.06848
A02	SYBR	Lmod3	Unkn	GM3	31.22	25.7833	19.3867	5.36667			-8.35556		327.546	1.14252	0.000841635
B02	SYBR	Lmod3	Unkn	GM3	31.22	26.0667	19.3533	5.56333			-8.15889		285.805	0.819163
C02	SYBR	Lmod3	Unkn	GM3	30.76	25.9367	19.33	5.93			-7.79222		221.663	1.06848
D02	SYBR	Lmod3	Unkn	DM1-1	27.91	25.11	19.7433	6.28			-7.44222		173.913	1.14252	1.35106e-05
E02	SYBR	Lmod3	Unkn	DM1-1	27.89	25.2467	19.6833	6.19			-7.53222		185.108	0.819163
F02	SYBR	Lmod3	Unkn	DM1-1	28.11	25.0933	19.1633	6.38333			-7.33889		161.892	1.06848
A03	SYBR	Lmod3	Unkn	DM1-2	27.91	24.8567	18.5767	6.15667			-7.56556		189.435	1.14252	1.43748e-05
B03	SYBR	Lmod3	Unkn	DM1-2	27.8	25.0533	18.8633	5.98667			-7.73556		213.125	0.819163
C03	SYBR	Lmod3	Unkn	DM1-2	27.81	24.9233	18.54	6.15			-7.57222		190.312	1.06848
D03	SYBR	Lmod3	Unkn	DM1-3	28.02	25.2033	19.0467
E03	SYBR	Lmod3	Unkn	DM1-3	27.82	24.8933	18.9067
F03	SYBR	Lmod3	Unkn	DM1-3	28.06	25.02	18.87
A04	SYBR	Lmod3	Unkn	DM2-1	25.84
B04	SYBR	Lmod3	Unkn	DM2-1	25.9
C04	SYBR	Lmod3	Unkn	DM2-1	25.61
D04	SYBR	Lmod3	Unkn	DM2-2	26.13
E04	SYBR	Lmod3	Unkn	DM2-2	25.95
F04	SYBR	Lmod3	Unkn	DM2-2	26.12
A05	SYBR	Lmod3	Unkn	DM2-3	25.94
B05	SYBR	Lmod3	Unkn	DM2-3	26.04			1.14252	0.819163	1.06848	17.5357	21.341	18.925	160.403	128.791	138.674	327.546	285.805	221.663	173.913	185.108	161.892	189.435	213.125	190.312
C05	SYBR	Lmod3	Unkn	DM2-3	25.83
D05	SYBR	Lmod3	Unkn	DM3-1	25.22
E05	SYBR	Lmod3	Unkn	DM3-1	24.91
F05	SYBR	Lmod3	Unkn	DM3-1	25.2
A06	SYBR	Lmod3	Unkn	DM3-2	25.34
B06	SYBR	Lmod3	Unkn	DM3-2	25.23
C06	SYBR	Lmod3	Unkn	DM3-2	25.17
D06	SYBR	Lmod3	Unkn	DM3-3	25.13
E06	SYBR	Lmod3	Unkn	DM3-3	25.09
F06	SYBR	Lmod3	Unkn	DM3-3	25.06
A07	SYBR	Lmod3	Unkn	DM4-1	25.01
B07	SYBR	Lmod3	Unkn	DM4-1	24.89
C07	SYBR	Lmod3	Unkn	DM4-1	24.67
D07	SYBR	Lmod3	Unkn	DM4-2	25.01
E07	SYBR	Lmod3	Unkn	DM4-2	25
F07	SYBR	Lmod3	Unkn	DM4-2	25.15
A08	SYBR	Lmod3	Unkn	DM4-3	25.06
B08	SYBR	Lmod3	Unkn	DM4-3	24.86
C08	SYBR	Lmod3	Unkn	DM4-3	24.85
D08	SYBR	Lmod3	Unkn	DM5-1	25.07
E08	SYBR	Lmod3	Unkn	DM5-1	25.21
F08	SYBR	Lmod3	Unkn	DM5-1	25.33
A09	SYBR	Lmod3	Unkn	DM5-2	25
B09	SYBR	Lmod3	Unkn	DM5-2	24.8
C09	SYBR	Lmod3	Unkn	DM5-2	24.88
D09	SYBR	Lmod3	Unkn	DM5-3	25.08
E09	SYBR	Lmod3	Unkn	DM5-3	24.99
F09	SYBR	Lmod3	Unkn	DM5-3	24.99

## Sheet: cell-Mybpc2
Well	Fluor	Target	Content	Sample	Cq
A01	SYBR	Mybpc2	Unkn	GM1	30.09	30.5633	17.8767	11.4633	12.6867	12.5256	-1.06222	0.161111	2.08815	0.894336	0.000447159
B01	SYBR	Mybpc2	Unkn	GM1	31.51	29.9833	17.5467	11.2567	12.4367		-1.26889	-0.0888889	2.40976	1.06355
C01	SYBR	Mybpc2	Unkn	GM1	30.09	29.8933	17.44	11.43	12.4533		-1.09556	-0.0722222	2.13695	1.05133
D01	SYBR	Mybpc2	Unkn	GM2	29.77	29.8433	18.38	8.8			-3.72556		13.2283	0.894336	0.00263683
E01	SYBR	Mybpc2	Unkn	GM2	30.59	29.79	18.5333	9.20667			-3.31889		9.97896	1.06355
F01	SYBR	Mybpc2	Unkn	GM2	29.59	29.9167	18.4867	9.46			-3.06556		8.3719	1.05133
A02	SYBR	Mybpc2	Unkn	GM3	29.92	28.1867	19.3867	7.77333			-4.75222		26.9502	0.894336	6.10332e-05
B02	SYBR	Mybpc2	Unkn	GM3	29.88	28.56	19.3533	7.69667			-4.82889		28.4211	1.06355
C02	SYBR	Mybpc2	Unkn	GM3	29.88	28.79	19.33	7.96667			-4.55889		23.5701	1.05133
D02	SYBR	Mybpc2	Unkn	DM1-1	29.36	27.5167	19.7433	9.83667			-2.68889		6.44817	0.894336	0.0043318
E02	SYBR	Mybpc2	Unkn	DM1-1	29.88	27.38	19.6833	9.47			-3.05556		8.31407	1.06355
F02	SYBR	Mybpc2	Unkn	DM1-1	30.29	27.13	19.1633	9.07667			-3.44889		10.9199	1.05133
A03	SYBR	Mybpc2	Unkn	DM1-2	29.3	28.4133	18.5767	9.48333			-3.04222		8.23759	0.894336	3.07142e-05
B03	SYBR	Mybpc2	Unkn	DM1-2	29.99	28.3333	18.8633	9.66			-2.86556		7.28816	1.06355
C03	SYBR	Mybpc2	Unkn	DM1-2	30.08	27.6167	18.54	9.65333			-2.87222		7.32192	1.05133
D03	SYBR	Mybpc2	Unkn	DM1-3	30.38	28.53	19.0467
E03	SYBR	Mybpc2	Unkn	DM1-3	29.74	28.5667	18.9067
F03	SYBR	Mybpc2	Unkn	DM1-3	29.63	28.5233	18.87
A04	SYBR	Mybpc2	Unkn	DM2-1	28.31
B04	SYBR	Mybpc2	Unkn	DM2-1	28.07
C04	SYBR	Mybpc2	Unkn	DM2-1	28.18
D04	SYBR	Mybpc2	Unkn	DM2-2	28.91
E04	SYBR	Mybpc2	Unkn	DM2-2	27.4
F04	SYBR	Mybpc2	Unkn	DM2-2	29.37
A05	SYBR	Mybpc2	Unkn	DM2-3	29.52
B05	SYBR	Mybpc2	Unkn	DM2-3	28.63			0.894336	1.06355	1.05133	2.08815	2.40976	2.13695	13.2283	9.97896	8.3719	26.9502	28.4211	23.5701	6.44817	8.31407	10.9199	8.23759	7.28816	7.32192
C05	SYBR	Mybpc2	Unkn	DM2-3	28.22
D05	SYBR	Mybpc2	Unkn	DM3-1	27.79
E05	SYBR	Mybpc2	Unkn	DM3-1	27.33
F05	SYBR	Mybpc2	Unkn	DM3-1	27.43
A06	SYBR	Mybpc2	Unkn	DM3-2	27.56
B06	SYBR	Mybpc2	Unkn	DM3-2	27.47
C06	SYBR	Mybpc2	Unkn	DM3-2	27.11
D06	SYBR	Mybpc2	Unkn	DM3-3	27.05
E06	SYBR	Mybpc2	Unkn	DM3-3	27.04
F06	SYBR	Mybpc2	Unkn	DM3-3	27.3
A07	SYBR	Mybpc2	Unkn	DM4-1	28.05
B07	SYBR	Mybpc2	Unkn	DM4-1	29.17
C07	SYBR	Mybpc2	Unkn	DM4-1	28.02
D07	SYBR	Mybpc2	Unkn	DM4-2	28
E07	SYBR	Mybpc2	Unkn	DM4-2	28.88
F07	SYBR	Mybpc2	Unkn	DM4-2	28.12
A08	SYBR	Mybpc2	Unkn	DM4-3	27.25
B08	SYBR	Mybpc2	Unkn	DM4-3	27.53
C08	SYBR	Mybpc2	Unkn	DM4-3	28.07
D08	SYBR	Mybpc2	Unkn	DM5-1	27.89
E08	SYBR	Mybpc2	Unkn	DM5-1	28.07
F08	SYBR	Mybpc2	Unkn	DM5-1	29.63
A09	SYBR	Mybpc2	Unkn	DM5-2	27.89
B09	SYBR	Mybpc2	Unkn	DM5-2	28.16
C09	SYBR	Mybpc2	Unkn	DM5-2	29.65
D09	SYBR	Mybpc2	Unkn	DM5-3	27.88
E09	SYBR	Mybpc2	Unkn	DM5-3	28.33
F09	SYBR	Mybpc2	Unkn	DM5-3	29.36

## Sheet: cell-Ryr1
Well	Fluor	Target	Content	Sample	Cq
A01	SYBR	Ryr1	Unkn	GM1	31.06	31.11	17.8767	10.0167	13.2333	13.5744	-3.55778	-0.341111	11.776	1.26673	3.13575e-05
B01	SYBR	Ryr1	Unkn	GM1	31.12	31.3033	17.5467	9.83667	13.7567		-3.73778	0.182222	13.3408	0.881344
C01	SYBR	Ryr1	Unkn	GM1	31.15	31.1733	17.44	10.02	13.7333		-3.55444	0.158889	11.7488	0.895715
D01	SYBR	Ryr1	Unkn	GM2	31.65	28.3967	18.38	7.84			-5.73444		53.2402	1.26673	0.00018696
E01	SYBR	Ryr1	Unkn	GM2	31.33	28.37	18.5333	8.20667			-5.36778		41.2916	0.881344
F01	SYBR	Ryr1	Unkn	GM2	30.93	28.5067	18.4867	8.04			-5.53444		46.3483	0.895715
A02	SYBR	Ryr1	Unkn	GM3	31.17	27.2267	19.3867	7.37333			-6.20111		73.5733	1.26673	0.000118459
B02	SYBR	Ryr1	Unkn	GM3	31.07	27.56	19.3533	7.42			-6.15444		71.2315	0.881344
C02	SYBR	Ryr1	Unkn	GM3	31.28	27.37	19.33	7.69			-5.88444		59.0737	0.895715
D02	SYBR	Ryr1	Unkn	DM1-1	28.33	27.1167	19.7433	8.39333			-5.18111		36.2802	1.26673	0.000539961
E02	SYBR	Ryr1	Unkn	DM1-1	28.22	27.1033	19.6833	8.22333			-5.35111		40.8174	0.881344
F02	SYBR	Ryr1	Unkn	DM1-1	28.64	26.8533	19.1633	8.71			-4.86444		29.1302	0.895715
A03	SYBR	Ryr1	Unkn	DM1-2	28.28	26.97	18.5767	8.06			-5.51444		45.7102	1.26673	0.00139706
B03	SYBR	Ryr1	Unkn	DM1-2	28.4	27.0867	18.8633	8.59			-4.98444		31.6568	0.881344
C03	SYBR	Ryr1	Unkn	DM1-2	28.43	27.25	18.54	8.54333			-5.03111		32.6976	0.895715
D03	SYBR	Ryr1	Unkn	DM1-3	28.52	27.1067	19.0467
E03	SYBR	Ryr1	Unkn	DM1-3	28.53	27.4967	18.9067
F03	SYBR	Ryr1	Unkn	DM1-3	28.47	27.4133	18.87
A04	SYBR	Ryr1	Unkn	DM2-1	27.29
B04	SYBR	Ryr1	Unkn	DM2-1	27.2
C04	SYBR	Ryr1	Unkn	DM2-1	27.19
D04	SYBR	Ryr1	Unkn	DM2-2	27.66
E04	SYBR	Ryr1	Unkn	DM2-2	27.47
F04	SYBR	Ryr1	Unkn	DM2-2	27.55
A05	SYBR	Ryr1	Unkn	DM2-3	27.59
B05	SYBR	Ryr1	Unkn	DM2-3	27.3			1.26673	0.881344	0.895715	11.776	13.3408	11.7488	53.2402	41.2916	46.3483	73.5733	71.2315	59.0737	36.2802	40.8174	29.1302	45.7102	31.6568	32.6976
C05	SYBR	Ryr1	Unkn	DM2-3	27.22
D05	SYBR	Ryr1	Unkn	DM3-1	27.05
E05	SYBR	Ryr1	Unkn	DM3-1	27.02
F05	SYBR	Ryr1	Unkn	DM3-1	27.28
A06	SYBR	Ryr1	Unkn	DM3-2	27.26
B06	SYBR	Ryr1	Unkn	DM3-2	27.02
C06	SYBR	Ryr1	Unkn	DM3-2	27.03
D06	SYBR	Ryr1	Unkn	DM3-3	26.77
E06	SYBR	Ryr1	Unkn	DM3-3	26.71
F06	SYBR	Ryr1	Unkn	DM3-3	27.08
A07	SYBR	Ryr1	Unkn	DM4-1	27.06
B07	SYBR	Ryr1	Unkn	DM4-1	27.06
C07	SYBR	Ryr1	Unkn	DM4-1	26.79
D07	SYBR	Ryr1	Unkn	DM4-2	26.93
E07	SYBR	Ryr1	Unkn	DM4-2	27.06
F07	SYBR	Ryr1	Unkn	DM4-2	27.27
A08	SYBR	Ryr1	Unkn	DM4-3	27.35
B08	SYBR	Ryr1	Unkn	DM4-3	27.23
C08	SYBR	Ryr1	Unkn	DM4-3	27.17
D08	SYBR	Ryr1	Unkn	DM5-1	26.99
E08	SYBR	Ryr1	Unkn	DM5-1	27.08
F08	SYBR	Ryr1	Unkn	DM5-1	27.25
A09	SYBR	Ryr1	Unkn	DM5-2	27.59
B09	SYBR	Ryr1	Unkn	DM5-2	27.55
C09	SYBR	Ryr1	Unkn	DM5-2	27.35
D09	SYBR	Ryr1	Unkn	DM5-3	27.45
E09	SYBR	Ryr1	Unkn	DM5-3	27.43
F09	SYBR	Ryr1	Unkn	DM5-3	27.36

## Sheet: cell-Tmod4
Well	Fluor	Target	Content	Sample	Cq
A01	SYBR	Tmod4	Unkn	GM1	32.09	32.2133	17.8767	13.0767	14.3367	14.5678	-1.49111	-0.231111	2.81105	1.17374	0.00382212
B01	SYBR	Tmod4	Unkn	GM1	32.11	32.1833	17.5467	13.4	14.6367		-1.16778	0.0688889	2.24665	0.953372
C01	SYBR	Tmod4	Unkn	GM1	32.44	32.17	17.44	13.4867	14.73		-1.08111	0.162222	2.11566	0.893648
D01	SYBR	Tmod4	Unkn	GM2	32.08	31.4567	18.38	11.79			-2.77778		6.85795	1.17374	1.01167e-05
E01	SYBR	Tmod4	Unkn	GM2	32.31	31.9333	18.5333	11.7933			-2.77444		6.84212	0.953372
F01	SYBR	Tmod4	Unkn	GM2	32.16	31.9733	18.4867	11.67			-2.89778		7.45278	0.893648
A02	SYBR	Tmod4	Unkn	GM3	32.09	31.1767	19.3867	10.8833			-3.68444		12.8567	1.17374	0.000140779
B02	SYBR	Tmod4	Unkn	GM3	32.16	31.1467	19.3533	11.2033			-3.36444		10.2991	0.953372
C02	SYBR	Tmod4	Unkn	GM3	32.26	31	19.33	11.0067			-3.56111		11.8032	0.893648
D02	SYBR	Tmod4	Unkn	DM1-1	31.54	30.6267	19.7433	11.5067			-3.06111		8.34615	1.17374	8.11697e-06
E02	SYBR	Tmod4	Unkn	DM1-1	31.27	30.8867	19.6833	11.37			-3.19778		9.17544	0.953372
F02	SYBR	Tmod4	Unkn	DM1-1	31.56	30.17	19.1633	11.47			-3.09778		8.56099	0.893648
A03	SYBR	Tmod4	Unkn	DM1-2	31.85	30.0833	18.5767	11.0233			-3.54444		11.6677	1.17374	1.2302e-05
B03	SYBR	Tmod4	Unkn	DM1-2	31.79	30.2333	18.8633	11.0133			-3.55444		11.7488	0.953372
C03	SYBR	Tmod4	Unkn	DM1-2	32.16	30.01	18.54	11.1667			-3.40111		10.5642	0.893648
D03	SYBR	Tmod4	Unkn	DM1-3	31.71	30.07	19.0467
E03	SYBR	Tmod4	Unkn	DM1-3	32.16	29.92	18.9067
F03	SYBR	Tmod4	Unkn	DM1-3	32.05	30.0367	18.87
A04	SYBR	Tmod4	Unkn	DM2-1	31.08
B04	SYBR	Tmod4	Unkn	DM2-1	31.21
C04	SYBR	Tmod4	Unkn	DM2-1	31.24
D04	SYBR	Tmod4	Unkn	DM2-2	30.99
E04	SYBR	Tmod4	Unkn	DM2-2	31.08
F04	SYBR	Tmod4	Unkn	DM2-2	31.37
A05	SYBR	Tmod4	Unkn	DM2-3	30.82
B05	SYBR	Tmod4	Unkn	DM2-3	31.16			1.26673	0.881344	0.895715	2.81105	2.24665	2.11566	6.85795	6.84212	7.45278	12.8567	10.2991	11.8032	8.34615	9.17544	8.56099	11.6677	11.7488	10.5642
C05	SYBR	Tmod4	Unkn	DM2-3	31.02
D05	SYBR	Tmod4	Unkn	DM3-1	30.43
E05	SYBR	Tmod4	Unkn	DM3-1	30.61
F05	SYBR	Tmod4	Unkn	DM3-1	30.84
A06	SYBR	Tmod4	Unkn	DM3-2	30.9
B06	SYBR	Tmod4	Unkn	DM3-2	30.82
C06	SYBR	Tmod4	Unkn	DM3-2	30.94
D06	SYBR	Tmod4	Unkn	DM3-3	30.15
E06	SYBR	Tmod4	Unkn	DM3-3	30.12
F06	SYBR	Tmod4	Unkn	DM3-3	30.24
A07	SYBR	Tmod4	Unkn	DM4-1	30.05
B07	SYBR	Tmod4	Unkn	DM4-1	30.03
C07	SYBR	Tmod4	Unkn	DM4-1	30.17
D07	SYBR	Tmod4	Unkn	DM4-2	30.27
E07	SYBR	Tmod4	Unkn	DM4-2	30.27
F07	SYBR	Tmod4	Unkn	DM4-2	30.16
A08	SYBR	Tmod4	Unkn	DM4-3	29.99
B08	SYBR	Tmod4	Unkn	DM4-3	29.97
C08	SYBR	Tmod4	Unkn	DM4-3	30.07
D08	SYBR	Tmod4	Unkn	DM5-1	30.02
E08	SYBR	Tmod4	Unkn	DM5-1	30.11
F08	SYBR	Tmod4	Unkn	DM5-1	30.08
A09	SYBR	Tmod4	Unkn	DM5-2	29.87
B09	SYBR	Tmod4	Unkn	DM5-2	29.98
C09	SYBR	Tmod4	Unkn	DM5-2	29.91
D09	SYBR	Tmod4	Unkn	DM5-3	29.96
E09	SYBR	Tmod4	Unkn	DM5-3	30.04
F09	SYBR	Tmod4	Unkn	DM5-3	30.11

## Sheet: GAPDH
Well	Fluor	Target	Content	Sample	Cq
A01	SYBR	GAPDH	Unkn	GM1	17.77	17.8767
B01	SYBR	GAPDH	Unkn	GM1	17.91	17.5467
C01	SYBR	GAPDH	Unkn	GM1	17.95	17.44
A02	SYBR	GAPDH	Unkn	GM2	17.6	18.38
B02	SYBR	GAPDH	Unkn	GM2	17.6	18.5333
C02	SYBR	GAPDH	Unkn	GM2	17.44	18.4867
A03	SYBR	GAPDH	Unkn	GM3	17.44	19.3867
B03	SYBR	GAPDH	Unkn	GM3	17.51	19.3533
C03	SYBR	GAPDH	Unkn	GM3	17.37	19.33
A04	SYBR	GAPDH	Unkn	DM1-1	18.39	19.7433
B04	SYBR	GAPDH	Unkn	DM1-1	18.46	19.6833
C04	SYBR	GAPDH	Unkn	DM1-1	18.29	19.1633
A05	SYBR	GAPDH	Unkn	DM1-2	18.58	18.5767
B05	SYBR	GAPDH	Unkn	DM1-2	18.62	18.8633
C05	SYBR	GAPDH	Unkn	DM1-2	18.4	18.54
A06	SYBR	GAPDH	Unkn	DM1-3	18.48	19.0467
B06	SYBR	GAPDH	Unkn	DM1-3	18.63	18.9067
C06	SYBR	GAPDH	Unkn	DM1-3	18.35	18.87
A07	SYBR	GAPDH	Unkn	DM2-1	19.38
B07	SYBR	GAPDH	Unkn	DM2-1	19.51
C07	SYBR	GAPDH	Unkn	DM2-1	19.27
A11	SYBR	GAPDH	Unkn	DM2-2	19.41
B11	SYBR	GAPDH	Unkn	DM2-2	19.36
C11	SYBR	GAPDH	Unkn	DM2-2	19.29
A12	SYBR	GAPDH	Unkn	DM2-3	19.36
B12	SYBR	GAPDH	Unkn	DM2-3	19.44
C12	SYBR	GAPDH	Unkn	DM2-3	19.19
D01	SYBR	GAPDH	Unkn	DM3-1	19.7
E01	SYBR	GAPDH	Unkn	DM3-1	19.74
F01	SYBR	GAPDH	Unkn	DM3-1	19.79
D02	SYBR	GAPDH	Unkn	DM3-2	19.82
E02	SYBR	GAPDH	Unkn	DM3-2	19.45
F02	SYBR	GAPDH	Unkn	DM3-2	19.78
D03	SYBR	GAPDH	Unkn	DM3-3	19.21
E03	SYBR	GAPDH	Unkn	DM3-3	19.08
F03	SYBR	GAPDH	Unkn	DM3-3	19.2
D04	SYBR	GAPDH	Unkn	DM4-1	18.58
E04	SYBR	GAPDH	Unkn	DM4-1	18.45
F04	SYBR	GAPDH	Unkn	DM4-1	18.7
D05	SYBR	GAPDH	Unkn	DM4-2	18.91
E05	SYBR	GAPDH	Unkn	DM4-2	18.76
F05	SYBR	GAPDH	Unkn	DM4-2	18.92
D06	SYBR	GAPDH	Unkn	DM4-3	18.59
E06	SYBR	GAPDH	Unkn	DM4-3	18.44
F06	SYBR	GAPDH	Unkn	DM4-3	18.59
D07	SYBR	GAPDH	Unkn	DM5-1	19.06
E07	SYBR	GAPDH	Unkn	DM5-1	19.01
F07	SYBR	GAPDH	Unkn	DM5-1	19.07
D08	SYBR	GAPDH	Unkn	DM5-2	19.07
E08	SYBR	GAPDH	Unkn	DM5-2	18.73
F08	SYBR	GAPDH	Unkn	DM5-2	18.92
D09	SYBR	GAPDH	Unkn	DM5-3	18.88
E09	SYBR	GAPDH	Unkn	DM5-3	18.8
F09	SYBR	GAPDH	Unkn	DM5-3	18.93
