# Supplementary material for: Identification of key genes in bovine muscle development by co-expression analysis
Source: PeerJ. 2023 Apr 12;11:e15093. doi: 10.7717/peerj.15093 (PMC10105563; doi:10.7717/peerj.15093)
Supplement: Supplemental Information 2 [file peerj-11-15093-s002.xlsx]

## Sheet: Atp2a1
Well	Fluor	Target	Content	Sample	Cq
A01	SYBR	ATP2A1	Unkn	heart1	30.35	31.07	25.1375	5.9325	1.6725	1.785	4.1475	-0.1125	0.0564258	1.0811	2.66121e-05
B01	SYBR	ATP2A1	Unkn	heart1	31.99	30.3025	24.7025	5.6	1.8025		3.815	0.0175	0.0710511	0.987943
C01	SYBR	ATP2A1	Unkn	heart1	31.44	30.025	24.6025	5.4225	1.88		3.6375	0.095	0.0803532	0.936272
D01	SYBR	ATP2A1	Unkn	heart1	30.5	30.7475	21.81	8.9375			7.1525		0.00702883	1.0811	1.96983e-05
A02	SYBR	ATP2A1	Unkn	heart2	30.11	30.935	22.3525	8.5825			6.7975		0.00898977	0.987943
B02	SYBR	ATP2A1	Unkn	heart2	30.46	30.5925	22.2725	8.32			6.535		0.0107837	0.936272
C02	SYBR	ATP2A1	Unkn	heart2	30.59	26.9475	20.045	6.9025			5.1175		0.0288057	1.0811	2.17784e-05
D02	SYBR	ATP2A1	Unkn	heart2	30.05	26.64	19.7675	6.8725			5.0875		0.029411	0.987943
A03	SYBR	ATP2A1	Unkn	heart3	30.11	26.66	20.1375	6.5225			4.7375		0.0374861	0.936272
B03	SYBR	ATP2A1	Unkn	heart3	30.2	30.9167	22.475	8.44167			6.65667		0.0099116	1.0811	2.00279e-05
C03	SYBR	ATP2A1	Unkn	heart3	29.66	31.2367	22.805	8.43167			6.64667		0.00998054	0.987943
D03	SYBR	ATP2A1	Unkn	heart3	30.13	30.8	23.0875	7.7125			5.9275		0.0164303	0.936272
A04	SYBR	ATP2A1	Unkn	liver1	29.45	30.5533	25.6225	4.93083			3.14583		0.112982	1.0811	7.42828e-05
B04	SYBR	ATP2A1	Unkn	liver1	30.7	30.49	26.2875	4.2025			2.4175		0.18718	0.987943
C04	SYBR	ATP2A1	Unkn	liver1	31.65	31.4675	27.3325	4.135			2.35		0.196146	0.936272
D04	SYBR	ATP2A1	Unkn	liver1	31.19	26.34	24.6675	1.6725			-0.1125		1.0811	1.0811	1
A05	SYBR	ATP2A1	Unkn	liver2	31.12	26.335	24.5325	1.8025			0.0175		0.987943	0.987943
B05	SYBR	ATP2A1	Unkn	liver2	30.27	25.0375	23.1575	1.88			0.095		0.936272	0.936272
C05	SYBR	ATP2A1	Unkn	liver2	31.65	31.665	25.665	6			4.215		0.0538466	1.0811	2.3787e-05
D05	SYBR	ATP2A1	Unkn	liver2	30.7	30.99	24.705	6.285			4.5		0.0441942	0.987943
A06	SYBR	ATP2A1	Unkn	liver3	29.03	30.4225	23.5775	6.845			5.06		0.029977	0.936272
B06	SYBR	ATP2A1	Unkn	liver3	31.07	28.575	20.11	8.465			6.68		0.00975258	1.0811	1.98359e-05
C06	SYBR	ATP2A1	Unkn	liver3	31.94	28.65	20.5475	8.1025			6.3175		0.0125384	0.987943
D06	SYBR	ATP2A1	Unkn	liver3	30.33	29.5125	21.09	8.4225			6.6375		0.0100442	0.936272
A07	SYBR	ATP2A1	Unkn	spleen1	26.58
B07	SYBR	ATP2A1	Unkn	spleen1	27.38
C07	SYBR	ATP2A1	Unkn	spleen1	27.18
D07	SYBR	ATP2A1	Unkn	spleen1	26.65
A08	SYBR	ATP2A1	Unkn	spleen2	26.38		1.0811	0.987943	0.936272	0.0564258	0.0710511	0.0803532	0.00702883	0.00898977	0.0107837	0.0288057	0.029411	0.0374861	0.0099116	0.00998054	0.0164303	0.112982	0.18718	0.196146	0.0538466	0.0441942	0.029977	0.00975258	0.0125384	0.0100442
B08	SYBR	ATP2A1	Unkn	spleen2	26.64
C08	SYBR	ATP2A1	Unkn	spleen2	26.52
D08	SYBR	ATP2A1	Unkn	spleen2	27.02
A09	SYBR	ATP2A1	Unkn	spleen3	26.87
B09	SYBR	ATP2A1	Unkn	spleen3	26.89
C09	SYBR	ATP2A1	Unkn	spleen3	26.38
D09	SYBR	ATP2A1	Unkn	spleen3	26.5
A10	SYBR	ATP2A1	Unkn	lung1	N/A
B10	SYBR	ATP2A1	Unkn	lung1	31.05
C10	SYBR	ATP2A1	Unkn	lung1	30.85
D10	SYBR	ATP2A1	Unkn	lung1	30.85
A11	SYBR	ATP2A1	Unkn	lung2	32.8
B11	SYBR	ATP2A1	Unkn	lung2	30.21
C11	SYBR	ATP2A1	Unkn	lung2	N/A
D11	SYBR	ATP2A1	Unkn	lung2	30.7
A12	SYBR	ATP2A1	Unkn	lung3	30.68
B12	SYBR	ATP2A1	Unkn	lung3	30.84
C12	SYBR	ATP2A1	Unkn	lung3	30.88
D12	SYBR	ATP2A1	Unkn	lung3	N/A
E01	SYBR	ATP2A1	Unkn	kidney1	30.13
F01	SYBR	ATP2A1	Unkn	kidney1	N/A
G01	SYBR	ATP2A1	Unkn	kidney1	30.66
H01	SYBR	ATP2A1	Unkn	kidney1	30.87
E02	SYBR	ATP2A1	Unkn	kidney2	29.98
F02	SYBR	ATP2A1	Unkn	kidney2	30.45
G02	SYBR	ATP2A1	Unkn	kidney2	N/A
H02	SYBR	ATP2A1	Unkn	kidney2	31.04
E03	SYBR	ATP2A1	Unkn	kidney3	31.09
F03	SYBR	ATP2A1	Unkn	kidney3	31.63
G03	SYBR	ATP2A1	Unkn	kidney3	31.55
H03	SYBR	ATP2A1	Unkn	kidney3	31.6
E04	SYBR	ATP2A1	Unkn	muscle1	26.23
F04	SYBR	ATP2A1	Unkn	muscle1	26.41
G04	SYBR	ATP2A1	Unkn	muscle1	26.25
H04	SYBR	ATP2A1	Unkn	muscle1	26.47
E05	SYBR	ATP2A1	Unkn	muscle2	26.27
F05	SYBR	ATP2A1	Unkn	muscle2	26.42
G05	SYBR	ATP2A1	Unkn	muscle2	26.25
H05	SYBR	ATP2A1	Unkn	muscle2	26.4
E06	SYBR	ATP2A1	Unkn	muscle3	24.89
F06	SYBR	ATP2A1	Unkn	muscle3	25.13
G06	SYBR	ATP2A1	Unkn	muscle3	24.99
H06	SYBR	ATP2A1	Unkn	muscle3	25.14
E07	SYBR	ATP2A1	Unkn	adipose1	31.59
F07	SYBR	ATP2A1	Unkn	adipose1	31.86
G07	SYBR	ATP2A1	Unkn	adipose1	31.92
H07	SYBR	ATP2A1	Unkn	adipose1	31.29
E08	SYBR	ATP2A1	Unkn	adipose2	31.19
F08	SYBR	ATP2A1	Unkn	adipose2	30.86
G08	SYBR	ATP2A1	Unkn	adipose2	30.54
H08	SYBR	ATP2A1	Unkn	adipose2	31.37
E09	SYBR	ATP2A1	Unkn	adipose3	30.48
F09	SYBR	ATP2A1	Unkn	adipose3	30.68
G09	SYBR	ATP2A1	Unkn	adipose3	30.31
H09	SYBR	ATP2A1	Unkn	adipose3	30.22
E10	SYBR	ATP2A1	Unkn	rumen1	29.16
F10	SYBR	ATP2A1	Unkn	rumen1	28.59
G10	SYBR	ATP2A1	Unkn	rumen1	28.42
H10	SYBR	ATP2A1	Unkn	rumen1	28.13
E11	SYBR	ATP2A1	Unkn	rumen2	28.85
F11	SYBR	ATP2A1	Unkn	rumen2	29.18
G11	SYBR	ATP2A1	Unkn	rumen2	28.39
H11	SYBR	ATP2A1	Unkn	rumen2	28.18
E12	SYBR	ATP2A1	Unkn	rumen3	28.78
F12	SYBR	ATP2A1	Unkn	rumen3	29.37
G12	SYBR	ATP2A1	Unkn	rumen3	29.67
H12	SYBR	ATP2A1	Unkn	rumen3	30.23

## Sheet: Lmod3
Well	Fluor	Target	Content	Sample	Cq
A01	SYBR	Lmod3	Unkn	heart1	33.31	33.5	25.1375	8.3625	4.005	3.99	4.3725	0.015	0.0482777	0.989657	6.53129e-06
B01	SYBR	Lmod3	Unkn	heart1	33.47	32.525	24.7025	7.8225	4.055		3.8325	0.065	0.0701944	0.955945
C01	SYBR	Lmod3	Unkn	heart1	33.29	32.955	24.6025	8.3525	3.91		4.3625	-0.08	0.0486135	1.05702
D01	SYBR	Lmod3	Unkn	heart1	33.93	36.6525	21.81	14.8425			10.8525		0.000540844	0.989657	4.75694e-06
A02	SYBR	Lmod3	Unkn	heart2	32.85	33.67	22.3525	11.3175			7.3275		0.00622591	0.955945
B02	SYBR	Lmod3	Unkn	heart2	32.46	33.495	22.2725	11.2225			7.2325		0.00664968	1.05702
C02	SYBR	Lmod3	Unkn	heart2	32.37	31.2075	20.045	11.1625			7.1725		0.00693206	0.989657	4.73719e-06
D02	SYBR	Lmod3	Unkn	heart2	32.42	31.6675	19.7675	11.9			7.91		0.0041577	0.955945
A03	SYBR	Lmod3	Unkn	heart3	32.49	31.94	20.1375	11.8025			7.8125		0.00444839	1.05702
B03	SYBR	Lmod3	Unkn	heart3	33.23	31.645	22.475	9.17			5.18		0.0275845	0.989657	6.07582e-06
C03	SYBR	Lmod3	Unkn	heart3	32.91	31.335	22.805	8.53			4.54		0.0429857	0.955945
D03	SYBR	Lmod3	Unkn	heart3	33.19	31.3625	23.0875	8.275			4.285		0.0512964	1.05702
A04	SYBR	Lmod3	Unkn	liver1	37.71	32.2175	25.6225	6.595			2.605		0.164368	0.989657	4.29212e-05
B04	SYBR	Lmod3	Unkn	liver1	35.98	32.52	26.2875	6.2325			2.2425		0.21132	0.955945
C04	SYBR	Lmod3	Unkn	liver1	36.73	33.255	27.3325	5.9225			1.9325		0.261975	1.05702
D04	SYBR	Lmod3	Unkn	liver1	36.19	28.6725	24.6675	4.005			0.015		0.989657	0.989657	1
A05	SYBR	Lmod3	Unkn	liver2	33.74	28.5875	24.5325	4.055			0.065		0.955945	0.955945
B05	SYBR	Lmod3	Unkn	liver2	33.75	28.0675	24.1575	3.91			-0.08		1.05702	1.05702
C05	SYBR	Lmod3	Unkn	liver2	33.72	30.8225	25.665	5.1575			1.1675		0.445192	0.989657	0.000991672
D05	SYBR	Lmod3	Unkn	liver2	33.47	30.5225	24.705	5.8175			1.8275		0.281752	0.955945
A06	SYBR	Lmod3	Unkn	liver3	33.34	29.9725	23.5775	6.395			2.405		0.188809	1.05702
B06	SYBR	Lmod3	Unkn	liver3	33.27	32.04	20.11	11.93			7.94		0.00407213	0.989657	4.72613e-06
C06	SYBR	Lmod3	Unkn	liver3	33.66	32.3575	20.5475	11.81			7.82		0.00442533	0.955945
D06	SYBR	Lmod3	Unkn	liver3	33.71	32.46	21.09	11.37			7.38		0.00600342	1.05702
A07	SYBR	Lmod3	Unkn	spleen1	31.17
B07	SYBR	Lmod3	Unkn	spleen1	31.43
C07	SYBR	Lmod3	Unkn	spleen1	31.12
D07	SYBR	Lmod3	Unkn	spleen1	31.11
A08	SYBR	Lmod3	Unkn	spleen2	31.55
B08	SYBR	Lmod3	Unkn	spleen2	31.6
C08	SYBR	Lmod3	Unkn	spleen2	31.86			0.989657	0.955945	1.05702
D08	SYBR	Lmod3	Unkn	spleen2	31.66			0.0482777	0.0701944	0.0486135	0.000540844	0.00622591	0.00664968	0.00693206	0.0041577	0.00444839	0.0275845	0.0429857	0.0512964	0.164368	0.21132	0.261975	0.445192	0.281752	0.188809	0.00407213	0.00442533	0.00600342
A09	SYBR	Lmod3	Unkn	spleen3	31.86
B09	SYBR	Lmod3	Unkn	spleen3	32.13
C09	SYBR	Lmod3	Unkn	spleen3	31.68
D09	SYBR	Lmod3	Unkn	spleen3	32.09
A10	SYBR	Lmod3	Unkn	lung1	32.1
B10	SYBR	Lmod3	Unkn	lung1	31.67
C10	SYBR	Lmod3	Unkn	lung1	31.2
D10	SYBR	Lmod3	Unkn	lung1	31.61
A11	SYBR	Lmod3	Unkn	lung2	31.18
B11	SYBR	Lmod3	Unkn	lung2	31.15
C11	SYBR	Lmod3	Unkn	lung2	31.45
D11	SYBR	Lmod3	Unkn	lung2	31.56
A12	SYBR	Lmod3	Unkn	lung3	31.13
B12	SYBR	Lmod3	Unkn	lung3	31.39
C12	SYBR	Lmod3	Unkn	lung3	31.63
D12	SYBR	Lmod3	Unkn	lung3	31.3
E01	SYBR	Lmod3	Unkn	kidney1	32.1
F01	SYBR	Lmod3	Unkn	kidney1	32.3
G01	SYBR	Lmod3	Unkn	kidney1	31.8
H01	SYBR	Lmod3	Unkn	kidney1	32.67
E02	SYBR	Lmod3	Unkn	kidney2	32.56
F02	SYBR	Lmod3	Unkn	kidney2	32.43
G02	SYBR	Lmod3	Unkn	kidney2	32.57
H02	SYBR	Lmod3	Unkn	kidney2	32.52
E03	SYBR	Lmod3	Unkn	kidney3	33.27
F03	SYBR	Lmod3	Unkn	kidney3	33.17
G03	SYBR	Lmod3	Unkn	kidney3	33.5
H03	SYBR	Lmod3	Unkn	kidney3	33.08
E04	SYBR	Lmod3	Unkn	muscle1	28.57
F04	SYBR	Lmod3	Unkn	muscle1	28.73
G04	SYBR	Lmod3	Unkn	muscle1	28.59
H04	SYBR	Lmod3	Unkn	muscle1	28.8
E05	SYBR	Lmod3	Unkn	muscle2	28.43
F05	SYBR	Lmod3	Unkn	muscle2	28.73
G05	SYBR	Lmod3	Unkn	muscle2	28.53
H05	SYBR	Lmod3	Unkn	muscle2	28.66
E06	SYBR	Lmod3	Unkn	muscle3	28.09
F06	SYBR	Lmod3	Unkn	muscle3	28.07
G06	SYBR	Lmod3	Unkn	muscle3	28.04
H06	SYBR	Lmod3	Unkn	muscle3	28.07
E07	SYBR	Lmod3	Unkn	adipose1	30.79
F07	SYBR	Lmod3	Unkn	adipose1	30.82
G07	SYBR	Lmod3	Unkn	adipose1	30.91
H07	SYBR	Lmod3	Unkn	adipose1	30.77
E08	SYBR	Lmod3	Unkn	adipose2	30.31
F08	SYBR	Lmod3	Unkn	adipose2	30.59
G08	SYBR	Lmod3	Unkn	adipose2	30.61
H08	SYBR	Lmod3	Unkn	adipose2	30.58
E09	SYBR	Lmod3	Unkn	adipose3	29.82
F09	SYBR	Lmod3	Unkn	adipose3	30.05
G09	SYBR	Lmod3	Unkn	adipose3	29.88
H09	SYBR	Lmod3	Unkn	adipose3	30.14
E10	SYBR	Lmod3	Unkn	rumen1	31.84
F10	SYBR	Lmod3	Unkn	rumen1	32.19
G10	SYBR	Lmod3	Unkn	rumen1	31.99
H10	SYBR	Lmod3	Unkn	rumen1	32.14
E11	SYBR	Lmod3	Unkn	rumen2	32.6
F11	SYBR	Lmod3	Unkn	rumen2	32.53
G11	SYBR	Lmod3	Unkn	rumen2	32.31
H11	SYBR	Lmod3	Unkn	rumen2	31.99
E12	SYBR	Lmod3	Unkn	rumen3	32.39
F12	SYBR	Lmod3	Unkn	rumen3	32.48
G12	SYBR	Lmod3	Unkn	rumen3	32.47
H12	SYBR	Lmod3	Unkn	rumen3	32.5

## Sheet: Mybpc2
Well	Fluor	Target	Content	Sample	Cq
A01	SYBR	Mybpc2	Unkn	heart1	31.02	31.0025	25.1375	5.865	4.56	4.38417	1.48083	0.175833	0.358282	0.885256	0.00361365
B01	SYBR	Mybpc2	Unkn	heart1	30.95	31.345	24.7025	6.6425	4.5125		2.25833	0.128333	0.209013	0.914888
C01	SYBR	Mybpc2	Unkn	heart1	30.95	30.91	24.6025	6.3075	4.08		1.92333	-0.304167	0.263645	1.23471
D01	SYBR	Mybpc2	Unkn	heart1	31.09	29.1775	21.81	7.3675			2.98333		0.126452	0.885256	0.00140797
A02	SYBR	Mybpc2	Unkn	heart2	31.04	29.505	22.3525	7.1525			2.76833		0.146774	0.914888
B02	SYBR	Mybpc2	Unkn	heart2	31.15	29.935	22.2725	7.6625			3.27833		0.103068	1.23471
C02	SYBR	Mybpc2	Unkn	heart2	31.05	29.8525	20.045	9.8075			5.42333		0.0233031	0.885256	0.000901268
D02	SYBR	Mybpc2	Unkn	heart2	32.14	29.925	19.7675	10.1575			5.77333		0.0182833	0.914888
A03	SYBR	Mybpc2	Unkn	heart3	31.27	29.92	20.1375	9.7825			5.39833		0.0237104	1.23471
B03	SYBR	Mybpc2	Unkn	heart3	31.07	30.3575	22.475	7.8825			3.49833		0.0884905	0.885256	0.00125281
C03	SYBR	Mybpc2	Unkn	heart3	30.28	30.3075	22.805	7.5025			3.11833		0.115156	0.914888
D03	SYBR	Mybpc2	Unkn	heart3	31.02	30.785	23.0875	7.6975			3.31333		0.100598	1.23471
A04	SYBR	Mybpc2	Unkn	liver1	29.25	31.86	25.6225	6.2375			1.85333		0.276752	0.885256	0.00242983
B04	SYBR	Mybpc2	Unkn	liver1	29.31	33.2375	26.2875	6.95			2.56583		0.168891	0.914888
C04	SYBR	Mybpc2	Unkn	liver1	29.25	33.925	27.3325	6.5925			2.20833		0.216384	1.23471
D04	SYBR	Mybpc2	Unkn	liver1	28.9	29.2275	24.6675	4.56			0.175833		0.885256	0.885256	1
A05	SYBR	Mybpc2	Unkn	liver2	29.91	29.045	24.5325	4.5125			0.128333		0.914888	0.914888
B05	SYBR	Mybpc2	Unkn	liver2	30.13	28.2375	24.1575	4.08			-0.304167		1.23471	1.23471
C05	SYBR	Mybpc2	Unkn	liver2	28.14	33.55	25.665	7.885			3.50083		0.0883373	0.885256	0.00113125
D05	SYBR	Mybpc2	Unkn	liver2	29.84	32.79	24.705	8.085			3.70083		0.0769021	0.914888
A06	SYBR	Mybpc2	Unkn	liver3	29.9	31.85	23.5775	8.2725			3.88833		0.0675297	1.23471
B06	SYBR	Mybpc2	Unkn	liver3	29.9	31.4275	20.11	11.3175			6.93333		0.00818199	0.885256	0.000860426
C06	SYBR	Mybpc2	Unkn	liver3	29.82	31.57	20.5475	11.0225			6.63833		0.0100384	0.914888
D06	SYBR	Mybpc2	Unkn	liver3	30.12	31.9467	21.09	10.8567			6.4725		0.0112612	1.23471
A07	SYBR	Mybpc2	Unkn	spleen1	29.71
B07	SYBR	Mybpc2	Unkn	spleen1	30.12
C07	SYBR	Mybpc2	Unkn	spleen1	29.73
D07	SYBR	Mybpc2	Unkn	spleen1	29.85
A08	SYBR	Mybpc2	Unkn	spleen2	29.85
B08	SYBR	Mybpc2	Unkn	spleen2	29.96
C08	SYBR	Mybpc2	Unkn	spleen2	29.95
D08	SYBR	Mybpc2	Unkn	spleen2	29.94				0.885256	0.914888	1.23471	0.358282	0.209013	0.263645	0.126452	0.146774	0.103068	0.0233031	0.0182833	0.0237104	0.0884905	0.115156	0.100598	0.276752	0.168891	0.216384	0.0883373	0.0769021	0.0675297	0.00818199	0.0100384	0.0112612
A09	SYBR	Mybpc2	Unkn	spleen3	29.47
B09	SYBR	Mybpc2	Unkn	spleen3	30.05
C09	SYBR	Mybpc2	Unkn	spleen3	30.12
D09	SYBR	Mybpc2	Unkn	spleen3	30.04
A10	SYBR	Mybpc2	Unkn	lung1	30.34
B10	SYBR	Mybpc2	Unkn	lung1	30.4
C10	SYBR	Mybpc2	Unkn	lung1	30.28
D10	SYBR	Mybpc2	Unkn	lung1	30.41
A11	SYBR	Mybpc2	Unkn	lung2	30.33
B11	SYBR	Mybpc2	Unkn	lung2	30.29
C11	SYBR	Mybpc2	Unkn	lung2	30.26
D11	SYBR	Mybpc2	Unkn	lung2	30.35
A12	SYBR	Mybpc2	Unkn	lung3	31.54
B12	SYBR	Mybpc2	Unkn	lung3	31.57
C12	SYBR	Mybpc2	Unkn	lung3	30.38
D12	SYBR	Mybpc2	Unkn	lung3	29.65
E01	SYBR	Mybpc2	Unkn	kidney1	31.1
F01	SYBR	Mybpc2	Unkn	kidney1	32.27
G01	SYBR	Mybpc2	Unkn	kidney1	32.17
H01	SYBR	Mybpc2	Unkn	kidney1	31.9
E02	SYBR	Mybpc2	Unkn	kidney2	33.14
F02	SYBR	Mybpc2	Unkn	kidney2	33.3
G02	SYBR	Mybpc2	Unkn	kidney2	33.27
H02	SYBR	Mybpc2	Unkn	kidney2	33.24
E03	SYBR	Mybpc2	Unkn	kidney3	33.83
F03	SYBR	Mybpc2	Unkn	kidney3	33.97
G03	SYBR	Mybpc2	Unkn	kidney3	33.94
H03	SYBR	Mybpc2	Unkn	kidney3	33.96
E04	SYBR	Mybpc2	Unkn	muscle1	28.71
F04	SYBR	Mybpc2	Unkn	muscle1	29.38
G04	SYBR	Mybpc2	Unkn	muscle1	29.33
H04	SYBR	Mybpc2	Unkn	muscle1	29.49
E05	SYBR	Mybpc2	Unkn	muscle2	28.29
F05	SYBR	Mybpc2	Unkn	muscle2	29.33
G05	SYBR	Mybpc2	Unkn	muscle2	29.25
H05	SYBR	Mybpc2	Unkn	muscle2	29.31
E06	SYBR	Mybpc2	Unkn	muscle3	28.31
F06	SYBR	Mybpc2	Unkn	muscle3	28.24
G06	SYBR	Mybpc2	Unkn	muscle3	28.28
H06	SYBR	Mybpc2	Unkn	muscle3	28.12
E07	SYBR	Mybpc2	Unkn	adipose1	33.34
F07	SYBR	Mybpc2	Unkn	adipose1	33.48
G07	SYBR	Mybpc2	Unkn	adipose1	33.9
H07	SYBR	Mybpc2	Unkn	adipose1	33.48
E08	SYBR	Mybpc2	Unkn	adipose2	32.96
F08	SYBR	Mybpc2	Unkn	adipose2	32.54
G08	SYBR	Mybpc2	Unkn	adipose2	32.44
H08	SYBR	Mybpc2	Unkn	adipose2	33.22
E09	SYBR	Mybpc2	Unkn	adipose3	30.86
F09	SYBR	Mybpc2	Unkn	adipose3	32.21
G09	SYBR	Mybpc2	Unkn	adipose3	32.42
H09	SYBR	Mybpc2	Unkn	adipose3	31.91
E10	SYBR	Mybpc2	Unkn	rumen1	31.31
F10	SYBR	Mybpc2	Unkn	rumen1	31.58
G10	SYBR	Mybpc2	Unkn	rumen1	31.41
H10	SYBR	Mybpc2	Unkn	rumen1	31.41
E11	SYBR	Mybpc2	Unkn	rumen2	31.94
F11	SYBR	Mybpc2	Unkn	rumen2	32
G11	SYBR	Mybpc2	Unkn	rumen2	31.6
H11	SYBR	Mybpc2	Unkn	rumen2	30.74
E12	SYBR	Mybpc2	Unkn	rumen3	N/A
F12	SYBR	Mybpc2	Unkn	rumen3	31.91
G12	SYBR	Mybpc2	Unkn	rumen3	31.94
H12	SYBR	Mybpc2	Unkn	rumen3	31.99

## Sheet: Ryr1
Well	Fluor	Target	Content	Sample	Cq
A01	SYBR	Ryr1	Unkn	heart1	33.43	33.53	25.1375	8.3925	5.335	5.23917	3.15333	0.0958333	0.112396	0.935732	2.11574e-05
B01	SYBR	Ryr1	Unkn	heart1	33.82	33.105	24.7025	8.4025	5.145		3.16333	-0.0941667	0.11162	1.06745
C01	SYBR	Ryr1	Unkn	heart1	33.67	33.3925	24.6025	8.79	5.2375		3.55083	-0.00166667	0.0853282	1.00116
D01	SYBR	Ryr1	Unkn	heart1	33.2	33.6125	21.81	11.8025			6.56333		0.010574	0.935732	1.28646e-05
A02	SYBR	Ryr1	Unkn	heart2	32.95	34.2375	22.3525	11.885			6.64583		0.0099863	1.06745
B02	SYBR	Ryr1	Unkn	heart2	33.36	34.155	22.2725	11.8825			6.64333		0.0100036	1.00116
C02	SYBR	Ryr1	Unkn	heart2	33.36	32.14	20.045	12.095			6.85583		0.00863353	0.935732	1.26967e-05
D02	SYBR	Ryr1	Unkn	heart2	32.75	32.6325	19.7675	12.865			7.62583		0.00506285	1.06745
A03	SYBR	Ryr1	Unkn	heart3	33.09	32.79	20.1375	12.6525			7.41333		0.0058663	1.00116
B03	SYBR	Ryr1	Unkn	heart3	33.82	31.9775	22.475	9.5025			4.26333		0.0520725	0.935732	1.66014e-05
C03	SYBR	Ryr1	Unkn	heart3	33.72	32.3075	22.805	9.5025			4.26333		0.0520725	1.06745
D03	SYBR	Ryr1	Unkn	heart3	32.94	32.135	23.0875	9.0475			3.80833		0.0713801	1.00116
A04	SYBR	Ryr1	Unkn	liver1	33.61	31.5933	25.6225	5.97075			0.731583		0.602243	0.935732	0.00147911
B04	SYBR	Ryr1	Unkn	liver1	33.43	32.625	26.2875	6.3375			1.09833		0.467056	1.06745
C04	SYBR	Ryr1	Unkn	liver1	33.75	33.33	27.3325	5.9975			0.758333		0.591179	1.00116
D04	SYBR	Ryr1	Unkn	liver1	33.66	30.0025	24.6675	5.335			0.0958333		0.935732	0.935732	1
A05	SYBR	Ryr1	Unkn	liver2	33.84	29.6775	24.5325	5.145			-0.0941667		1.06745	1.06745
B05	SYBR	Ryr1	Unkn	liver2	34.66	29.395	24.1575	5.2375			-0.00166667		1.00116	1.00116
C05	SYBR	Ryr1	Unkn	liver2	33.94	33.0575	25.665	7.3925			2.15333		0.224793	0.935732	0.000122446
D05	SYBR	Ryr1	Unkn	liver2	34.51	33.0725	24.705	8.3675			3.12833		0.114361	1.06745
A06	SYBR	Ryr1	Unkn	liver3	34.25	32.515	23.5775	8.9375			3.69833		0.0770355	1.00116
B06	SYBR	Ryr1	Unkn	liver3	34.09	32.63	20.11	12.52			7.28083		0.00643059	0.935732	1.27453e-05
C06	SYBR	Ryr1	Unkn	liver3	33.94	32.925	20.5475	12.3775			7.13833		0.00709819	1.06745
D06	SYBR	Ryr1	Unkn	liver3	34.34	33.075	21.09	11.985			6.74583		0.00931755	1.00116
A07	SYBR	Ryr1	Unkn	spleen1	32.09
B07	SYBR	Ryr1	Unkn	spleen1	32.58
C07	SYBR	Ryr1	Unkn	spleen1	31.99
D07	SYBR	Ryr1	Unkn	spleen1	31.9
A08	SYBR	Ryr1	Unkn	spleen2	32.67
B08	SYBR	Ryr1	Unkn	spleen2	32.36
C08	SYBR	Ryr1	Unkn	spleen2	32.73
D08	SYBR	Ryr1	Unkn	spleen2	32.77
A09	SYBR	Ryr1	Unkn	spleen3	32.96			0.935732	1.06745	1.00116	0.112396	0.11162	0.0853282	0.010574	0.0099863	0.0100036	0.00863353	0.00506285	0.0058663	0.0520725	0.0520725	0.0713801	0.602243	0.467056	0.591179	0.224793	0.114361	0.0770355	0.00643059	0.00709819	0.00931755
B09	SYBR	Ryr1	Unkn	spleen3	33
C09	SYBR	Ryr1	Unkn	spleen3	32.67
D09	SYBR	Ryr1	Unkn	spleen3	32.53
A10	SYBR	Ryr1	Unkn	lung1	31.84
B10	SYBR	Ryr1	Unkn	lung1	32.15
C10	SYBR	Ryr1	Unkn	lung1	31.86
D10	SYBR	Ryr1	Unkn	lung1	32.06
A11	SYBR	Ryr1	Unkn	lung2	32.1
B11	SYBR	Ryr1	Unkn	lung2	32.35
C11	SYBR	Ryr1	Unkn	lung2	32.44
D11	SYBR	Ryr1	Unkn	lung2	32.34
A12	SYBR	Ryr1	Unkn	lung3	32.26
B12	SYBR	Ryr1	Unkn	lung3	32.28
C12	SYBR	Ryr1	Unkn	lung3	31.91
D12	SYBR	Ryr1	Unkn	lung3	32.09
E01	SYBR	Ryr1	Unkn	kidney1	31.35
F01	SYBR	Ryr1	Unkn	kidney1	31.911
G01	SYBR	Ryr1	Unkn	kidney1	31.942
H01	SYBR	Ryr1	Unkn	kidney1	31.17
E02	SYBR	Ryr1	Unkn	kidney2	32.58
F02	SYBR	Ryr1	Unkn	kidney2	32.87
G02	SYBR	Ryr1	Unkn	kidney2	32.54
H02	SYBR	Ryr1	Unkn	kidney2	32.51
E03	SYBR	Ryr1	Unkn	kidney3	33.13
F03	SYBR	Ryr1	Unkn	kidney3	33.42
G03	SYBR	Ryr1	Unkn	kidney3	33.11
H03	SYBR	Ryr1	Unkn	kidney3	33.66
E04	SYBR	Ryr1	Unkn	muscle1	30.05
F04	SYBR	Ryr1	Unkn	muscle1	30.17
G04	SYBR	Ryr1	Unkn	muscle1	29.74
H04	SYBR	Ryr1	Unkn	muscle1	30.05
E05	SYBR	Ryr1	Unkn	muscle2	29.63
F05	SYBR	Ryr1	Unkn	muscle2	29.74
G05	SYBR	Ryr1	Unkn	muscle2	29.87
H05	SYBR	Ryr1	Unkn	muscle2	29.47
E06	SYBR	Ryr1	Unkn	muscle3	29.26
F06	SYBR	Ryr1	Unkn	muscle3	29.46
G06	SYBR	Ryr1	Unkn	muscle3	29.28
H06	SYBR	Ryr1	Unkn	muscle3	29.58
E07	SYBR	Ryr1	Unkn	adipose1	32.57
F07	SYBR	Ryr1	Unkn	adipose1	33.47
G07	SYBR	Ryr1	Unkn	adipose1	32.82
H07	SYBR	Ryr1	Unkn	adipose1	33.37
E08	SYBR	Ryr1	Unkn	adipose2	32.86
F08	SYBR	Ryr1	Unkn	adipose2	33.23
G08	SYBR	Ryr1	Unkn	adipose2	33.03
H08	SYBR	Ryr1	Unkn	adipose2	33.17
E09	SYBR	Ryr1	Unkn	adipose3	32.53
F09	SYBR	Ryr1	Unkn	adipose3	32.93
G09	SYBR	Ryr1	Unkn	adipose3	32.13
H09	SYBR	Ryr1	Unkn	adipose3	32.47
E10	SYBR	Ryr1	Unkn	rumen1	32.74
F10	SYBR	Ryr1	Unkn	rumen1	32.54
G10	SYBR	Ryr1	Unkn	rumen1	32.57
H10	SYBR	Ryr1	Unkn	rumen1	32.67
E11	SYBR	Ryr1	Unkn	rumen2	32.66
F11	SYBR	Ryr1	Unkn	rumen2	32.97
G11	SYBR	Ryr1	Unkn	rumen2	33.18
H11	SYBR	Ryr1	Unkn	rumen2	32.89
E12	SYBR	Ryr1	Unkn	rumen3	32.92
F12	SYBR	Ryr1	Unkn	rumen3	33.21
G12	SYBR	Ryr1	Unkn	rumen3	33.25
H12	SYBR	Ryr1	Unkn	rumen3	32.92

## Sheet: Tmod4
Well	Fluor	Target	Content	Sample	Cq
A01	SYBR	Tmod4	Unkn	heart1	29.24	29.735	25.1375	4.5975	2.03	1.975	2.6225	0.055	0.162386	0.962594	8.36039e-06
B01	SYBR	Tmod4	Unkn	heart1	29.74	29.95	24.7025	5.2475	1.91		3.2725	-0.065	0.103485	1.04608
C01	SYBR	Tmod4	Unkn	heart1	29.56	29.425	24.6025	4.8225	1.985		2.8475	0.01	0.138937	0.993092
D01	SYBR	Tmod4	Unkn	heart1	30.4	35.46	21.81	13.65			11.675		0.000305826	0.962594	2.19754e-06
A02	SYBR	Tmod4	Unkn	heart2	29.93	31.3	22.3525	8.9475			6.9725		0.00796285	1.04608
B02	SYBR	Tmod4	Unkn	heart2	29.86	31.3625	22.2725	9.09			7.115		0.00721392	0.993092
C02	SYBR	Tmod4	Unkn	heart2	29.85	28.7	20.045	8.655			6.68		0.00975258	0.962594	2.1844e-06
D02	SYBR	Tmod4	Unkn	heart2	30.16	29.195	19.7675	9.4275			7.4525		0.00570918	1.04608
A03	SYBR	Tmod4	Unkn	heart3	29.38	29.3625	20.1375	9.225			7.25		0.0065695	0.993092
B03	SYBR	Tmod4	Unkn	heart3	29.33	29.1675	22.475	6.6925			4.7175		0.0380094	0.962594	3.2495e-06
C03	SYBR	Tmod4	Unkn	heart3	29.43	29.165	22.805	6.36			4.385		0.0478612	1.04608
D03	SYBR	Tmod4	Unkn	heart3	29.56	28.97	23.0875	5.8825			3.9075		0.0666385	0.993092
A04	SYBR	Tmod4	Unkn	liver1	35.06	29.6875	25.6225	4.065			2.09		0.234881	0.962594	0.000194194
B04	SYBR	Tmod4	Unkn	liver1	N/A	30.27	26.2875	3.9825			2.0075		0.248704	1.04608
C04	SYBR	Tmod4	Unkn	liver1	35.63	30.68	27.3325	3.3475			1.3725		0.386221	0.993092
D04	SYBR	Tmod4	Unkn	liver1	35.69	26.6975	24.6675	2.03			0.055		0.962594	0.962594	1
A05	SYBR	Tmod4	Unkn	liver2	31.16	26.4425	24.5325	1.91			-0.065		1.04608	1.04608
B05	SYBR	Tmod4	Unkn	liver2	31.07	25.1425	23.1575	1.985			0.01		0.993092	0.993092
C05	SYBR	Tmod4	Unkn	liver2	31.25	29.21	25.665	3.545			1.57		0.336808	0.962594	0.000178064
D05	SYBR	Tmod4	Unkn	liver2	31.72	28.7025	24.705	3.9975			2.0225		0.246131	1.04608
A06	SYBR	Tmod4	Unkn	liver3	31.09	28.1775	23.5775	4.6			2.625		0.162105	0.993092
B06	SYBR	Tmod4	Unkn	liver3	31.95	29.84	20.11	9.73			7.755		0.00462927	0.962594	2.15834e-06
C06	SYBR	Tmod4	Unkn	liver3	31.47	29.8575	20.5475	9.31			7.335		0.00619363	1.04608
D06	SYBR	Tmod4	Unkn	liver3	30.94	30.5675	21.09	9.4775			7.5025		0.00551471	0.993092
A07	SYBR	Tmod4	Unkn	spleen1	28.51
B07	SYBR	Tmod4	Unkn	spleen1	28.85
C07	SYBR	Tmod4	Unkn	spleen1	28.48
D07	SYBR	Tmod4	Unkn	spleen1	28.96
A08	SYBR	Tmod4	Unkn	spleen2	29.01		1.0811	0.987943	0.936272	0.162386	0.103485	0.138937	0.000305826	0.00796285	0.00721392	0.00975258	0.00570918	0.0065695	0.0380094	0.0478612	0.0666385	0.234881	0.248704	0.386221	0.336808	0.246131	0.162105	0.00462927	0.00619363	0.00551471
B08	SYBR	Tmod4	Unkn	spleen2	29.46
C08	SYBR	Tmod4	Unkn	spleen2	29
D08	SYBR	Tmod4	Unkn	spleen2	29.31
A09	SYBR	Tmod4	Unkn	spleen3	29.4
B09	SYBR	Tmod4	Unkn	spleen3	29.52
C09	SYBR	Tmod4	Unkn	spleen3	29.28
D09	SYBR	Tmod4	Unkn	spleen3	29.25
A10	SYBR	Tmod4	Unkn	lung1	28.82
B10	SYBR	Tmod4	Unkn	lung1	29.21
C10	SYBR	Tmod4	Unkn	lung1	29.27
D10	SYBR	Tmod4	Unkn	lung1	29.37
A11	SYBR	Tmod4	Unkn	lung2	29.05
B11	SYBR	Tmod4	Unkn	lung2	29.12
C11	SYBR	Tmod4	Unkn	lung2	29.13
D11	SYBR	Tmod4	Unkn	lung2	29.36
A12	SYBR	Tmod4	Unkn	lung3	29.07
B12	SYBR	Tmod4	Unkn	lung3	28.97
C12	SYBR	Tmod4	Unkn	lung3	28.77
D12	SYBR	Tmod4	Unkn	lung3	29.07
E01	SYBR	Tmod4	Unkn	kidney1	29.95
F01	SYBR	Tmod4	Unkn	kidney1	29.4
G01	SYBR	Tmod4	Unkn	kidney1	29.64
H01	SYBR	Tmod4	Unkn	kidney1	29.76
E02	SYBR	Tmod4	Unkn	kidney2	30.05
F02	SYBR	Tmod4	Unkn	kidney2	30.24
G02	SYBR	Tmod4	Unkn	kidney2	30.22
H02	SYBR	Tmod4	Unkn	kidney2	30.57
E03	SYBR	Tmod4	Unkn	kidney3	30.38
F03	SYBR	Tmod4	Unkn	kidney3	30.69
G03	SYBR	Tmod4	Unkn	kidney3	30.64
H03	SYBR	Tmod4	Unkn	kidney3	31.01
E04	SYBR	Tmod4	Unkn	muscle1	26.88
F04	SYBR	Tmod4	Unkn	muscle1	26.55
G04	SYBR	Tmod4	Unkn	muscle1	26.47
H04	SYBR	Tmod4	Unkn	muscle1	26.89
E05	SYBR	Tmod4	Unkn	muscle2	26.3
F05	SYBR	Tmod4	Unkn	muscle2	26.57
G05	SYBR	Tmod4	Unkn	muscle2	26.37
H05	SYBR	Tmod4	Unkn	muscle2	26.53
E06	SYBR	Tmod4	Unkn	muscle3	25.14
F06	SYBR	Tmod4	Unkn	muscle3	25.2
G06	SYBR	Tmod4	Unkn	muscle3	25.07
H06	SYBR	Tmod4	Unkn	muscle3	25.16
E07	SYBR	Tmod4	Unkn	adipose1	29.16
F07	SYBR	Tmod4	Unkn	adipose1	29.27
G07	SYBR	Tmod4	Unkn	adipose1	29.18
H07	SYBR	Tmod4	Unkn	adipose1	29.23
E08	SYBR	Tmod4	Unkn	adipose2	28.51
F08	SYBR	Tmod4	Unkn	adipose2	28.71
G08	SYBR	Tmod4	Unkn	adipose2	28.64
H08	SYBR	Tmod4	Unkn	adipose2	28.95
E09	SYBR	Tmod4	Unkn	adipose3	28.12
F09	SYBR	Tmod4	Unkn	adipose3	28.31
G09	SYBR	Tmod4	Unkn	adipose3	28.17
H09	SYBR	Tmod4	Unkn	adipose3	28.11
E10	SYBR	Tmod4	Unkn	rumen1	29.97
F10	SYBR	Tmod4	Unkn	rumen1	29.78
G10	SYBR	Tmod4	Unkn	rumen1	29.57
H10	SYBR	Tmod4	Unkn	rumen1	30.04
E11	SYBR	Tmod4	Unkn	rumen2	29.75
F11	SYBR	Tmod4	Unkn	rumen2	29.95
G11	SYBR	Tmod4	Unkn	rumen2	29.76
H11	SYBR	Tmod4	Unkn	rumen2	29.97
E12	SYBR	Tmod4	Unkn	rumen3	30.67
F12	SYBR	Tmod4	Unkn	rumen3	30.44
G12	SYBR	Tmod4	Unkn	rumen3	30.72
H12	SYBR	Tmod4	Unkn	rumen3	30.44

## Sheet: GAPDH
Well	Fluor	Target	Content	Sample	Cq
A01	SYBR	GAPDH	Unkn	heart1	25.02	25.1375
B01	SYBR	GAPDH	Unkn	heart1	25.17	24.7025
C01	SYBR	GAPDH	Unkn	heart1	25.2	24.6025
D01	SYBR	GAPDH	Unkn	heart1	25.16	21.81
A02	SYBR	GAPDH	Unkn	heart2	24.66	22.3525
B02	SYBR	GAPDH	Unkn	heart2	24.81	22.2725
C02	SYBR	GAPDH	Unkn	heart2	24.58	20.045
D02	SYBR	GAPDH	Unkn	heart2	24.76	19.7675
A03	SYBR	GAPDH	Unkn	heart3	24.53	20.1375
B03	SYBR	GAPDH	Unkn	heart3	24.7	22.475
C03	SYBR	GAPDH	Unkn	heart3	24.51	22.805
D03	SYBR	GAPDH	Unkn	heart3	24.67	23.0875
A04	SYBR	GAPDH	Unkn	liver1	21.76	25.6225
B04	SYBR	GAPDH	Unkn	liver1	21.89	26.2875
C04	SYBR	GAPDH	Unkn	liver1	21.72	27.3325
D04	SYBR	GAPDH	Unkn	liver1	21.87	24.6675
A05	SYBR	GAPDH	Unkn	liver2	22.41	24.5325
B05	SYBR	GAPDH	Unkn	liver2	22.42	23.1575
C05	SYBR	GAPDH	Unkn	liver2	22.22	25.665
D05	SYBR	GAPDH	Unkn	liver2	22.36	24.705
A06	SYBR	GAPDH	Unkn	liver3	22.26	23.5775
B06	SYBR	GAPDH	Unkn	liver3	22.4	20.11
C06	SYBR	GAPDH	Unkn	liver3	22.18	20.5475
D06	SYBR	GAPDH	Unkn	liver3	22.25	21.09
A07	SYBR	GAPDH	Unkn	spleen1	20.08
B07	SYBR	GAPDH	Unkn	spleen1	20.17
C07	SYBR	GAPDH	Unkn	spleen1	19.92
D07	SYBR	GAPDH	Unkn	spleen1	20.01
A08	SYBR	GAPDH	Unkn	spleen2	19.75
B08	SYBR	GAPDH	Unkn	spleen2	19.92
C08	SYBR	GAPDH	Unkn	spleen2	19.69
D08	SYBR	GAPDH	Unkn	spleen2	19.71
A09	SYBR	GAPDH	Unkn	spleen3	20.16
B09	SYBR	GAPDH	Unkn	spleen3	20.22
C09	SYBR	GAPDH	Unkn	spleen3	20.04
D09	SYBR	GAPDH	Unkn	spleen3	20.13
A10	SYBR	GAPDH	Unkn	lung1	22.47
B10	SYBR	GAPDH	Unkn	lung1	22.58
C10	SYBR	GAPDH	Unkn	lung1	22.38
D10	SYBR	GAPDH	Unkn	lung1	22.47
A11	SYBR	GAPDH	Unkn	lung2	22.8
B11	SYBR	GAPDH	Unkn	lung2	22.79
C11	SYBR	GAPDH	Unkn	lung2	22.69
D11	SYBR	GAPDH	Unkn	lung2	22.94
A12	SYBR	GAPDH	Unkn	lung3	23.1
B12	SYBR	GAPDH	Unkn	lung3	23.16
C12	SYBR	GAPDH	Unkn	lung3	22.96
D12	SYBR	GAPDH	Unkn	lung3	23.13
E01	SYBR	GAPDH	Unkn	kidney1	25.66
F01	SYBR	GAPDH	Unkn	kidney1	25.69
G01	SYBR	GAPDH	Unkn	kidney1	25.48
H01	SYBR	GAPDH	Unkn	kidney1	25.66
E02	SYBR	GAPDH	Unkn	kidney2	26.17
F02	SYBR	GAPDH	Unkn	kidney2	26.34
G02	SYBR	GAPDH	Unkn	kidney2	26.17
H02	SYBR	GAPDH	Unkn	kidney2	26.47
E03	SYBR	GAPDH	Unkn	kidney3	27.26
F03	SYBR	GAPDH	Unkn	kidney3	27.39
G03	SYBR	GAPDH	Unkn	kidney3	27.25
H03	SYBR	GAPDH	Unkn	kidney3	27.43
E04	SYBR	GAPDH	Unkn	muscle1	24.51
F04	SYBR	GAPDH	Unkn	muscle1	24.77
G04	SYBR	GAPDH	Unkn	muscle1	24.58
H04	SYBR	GAPDH	Unkn	muscle1	24.81
E05	SYBR	GAPDH	Unkn	muscle2	24.44
F05	SYBR	GAPDH	Unkn	muscle2	24.56
G05	SYBR	GAPDH	Unkn	muscle2	24.46
H05	SYBR	GAPDH	Unkn	muscle2	24.67
E06	SYBR	GAPDH	Unkn	muscle3	23.1
F06	SYBR	GAPDH	Unkn	muscle3	23.17
G06	SYBR	GAPDH	Unkn	muscle3	23.1
H06	SYBR	GAPDH	Unkn	muscle3	23.26
E07	SYBR	GAPDH	Unkn	adipose1	25.57
F07	SYBR	GAPDH	Unkn	adipose1	25.68
G07	SYBR	GAPDH	Unkn	adipose1	25.59
H07	SYBR	GAPDH	Unkn	adipose1	25.82
E08	SYBR	GAPDH	Unkn	adipose2	24.53
F08	SYBR	GAPDH	Unkn	adipose2	24.78
G08	SYBR	GAPDH	Unkn	adipose2	24.61
H08	SYBR	GAPDH	Unkn	adipose2	24.9
E09	SYBR	GAPDH	Unkn	adipose3	23.44
F09	SYBR	GAPDH	Unkn	adipose3	23.65
G09	SYBR	GAPDH	Unkn	adipose3	23.54
H09	SYBR	GAPDH	Unkn	adipose3	23.68
E10	SYBR	GAPDH	Unkn	rumen1	20.09
F10	SYBR	GAPDH	Unkn	rumen1	20.17
G10	SYBR	GAPDH	Unkn	rumen1	20.02
H10	SYBR	GAPDH	Unkn	rumen1	20.16
E11	SYBR	GAPDH	Unkn	rumen2	20.58
F11	SYBR	GAPDH	Unkn	rumen2	20.56
G11	SYBR	GAPDH	Unkn	rumen2	20.63
H11	SYBR	GAPDH	Unkn	rumen2	20.42
E12	SYBR	GAPDH	Unkn	rumen3	20.99
F12	SYBR	GAPDH	Unkn	rumen3	21.11
G12	SYBR	GAPDH	Unkn	rumen3	21.04
H12	SYBR	GAPDH	Unkn	rumen3	21.22
