# Supplementary material for: Identification of key genes in bovine muscle development by co-expression analysis
Source: PeerJ. 2023 Apr 12;11:e15093. doi: 10.7717/peerj.15093 (PMC10105563; doi:10.7717/peerj.15093)
Supplement: Supplemental Information 3 [file peerj-11-15093-s003.xlsx]

## Sheet: Atp2a1
Well	Fluor	Target	Content	Sample	Cq
A01	SYBR	Atp2a1	Unkn	heart1	32.28	31.985	26.4275	5.5575	0.46	0.368333	5.18917	0.0916667	0.0274098	0.938438	4.8726e-05
B01	SYBR	Atp2a1	Unkn	heart1	32.11	32	26.415	5.585	0.4225		5.21667	0.0541667	0.0268922	0.963151
C01	SYBR	Atp2a1	Unkn	heart1	31.82	31.9975	26.35	5.6475	0.2225		5.27917	-0.145833	0.0257521	1.10637
D01	SYBR	Atp2a1	Unkn	heart1	31.73	31.6433	21.7525	9.89083			9.5225		0.0013597	0.938438	4.40971e-05
A02	SYBR	Atp2a1	Unkn	heart2	31.88	31.7025	22.38	9.3225			8.95417		0.00201617	0.963151
B02	SYBR	Atp2a1	Unkn	heart2	31.9	31.7467	22.48	9.26667			8.89833		0.00209573	1.10637
C02	SYBR	Atp2a1	Unkn	heart2	32.22	32.27	27.285	4.985			4.61667		0.040761	0.938438	5.46276e-05		z
D02	SYBR	Atp2a1	Unkn	heart2	N/A	31.995	27.48	4.515			4.14667		0.0564585	0.963151
A03	SYBR	Atp2a1	Unkn	heart3	31.81	31.86	27.28	4.58			4.21167		0.0539712	1.10637
B03	SYBR	Atp2a1	Unkn	heart3	32.2	31.875	26.62	5.255			4.88667		0.0338039	0.938438	4.93525e-05
C03	SYBR	Atp2a1	Unkn	heart3	32.18	32.3975	26.2525	6.145			5.77667		0.0182411	0.963151
D03	SYBR	Atp2a1	Unkn	heart3	31.8	31.6575	26.0675	5.59			5.22167		0.0267992	1.10637
A04	SYBR	Atp2a1	Unkn	liver1	31.13	29.5625	26.2475	3.315			2.94667		0.129707	0.938438	9.05841e-05
B04	SYBR	Atp2a1	Unkn	liver1	31.89	29.6533	26.4425	3.21083			2.8425		0.139419	0.963151
C04	SYBR	Atp2a1	Unkn	liver1	N/A	29.3133	26.3875	2.92583			2.5575		0.16987	1.10637
D04	SYBR	Atp2a1	Unkn	liver1	31.91	26.0425	25.5825	0.46			0.0916667		0.938438	0.938438	1
A05	SYBR	Atp2a1	Unkn	liver2	31.67	25.6375	25.215	0.4225			0.0541667		0.963151	0.963151
B05	SYBR	Atp2a1	Unkn	liver2	31.81	26.5325	26.31	0.2225			-0.145833		1.10637	1.10637
C05	SYBR	Atp2a1	Unkn	liver2	31.64	31.49	26.965	4.525			4.15667		0.0560685	0.938438	5.44088e-05
D05	SYBR	Atp2a1	Unkn	liver2	31.69	31.695	26.6975	4.9975			4.62917		0.0404094	0.963151
A06	SYBR	Atp2a1	Unkn	liver3	32.01	31.655	26.05	5.605			5.23667		0.026522	1.10637
B06	SYBR	Atp2a1	Unkn	liver3	31.54	30.84	28.3475	2.4925			2.12417		0.229383	0.938438	0.000148118
C06	SYBR	Atp2a1	Unkn	liver3	N/A	31.0333	28.1575	2.87583			2.5075		0.17586	0.963151
D06	SYBR	Atp2a1	Unkn	liver3	31.69	30.8275	28.4	2.4275			2.05917		0.239955	1.10637
A07	SYBR	Atp2a1	Unkn	spleen1	32.26
B07	SYBR	Atp2a1	Unkn	spleen1	32.41
C07	SYBR	Atp2a1	Unkn	spleen1	32.14
D07	SYBR	Atp2a1	Unkn	spleen1	N/A
A08	SYBR	Atp2a1	Unkn	spleen2	32.07
B08	SYBR	Atp2a1	Unkn	spleen2	32.06
C08	SYBR	Atp2a1	Unkn	spleen2	31.95			0.938438	0.963151	1.10637	0.0274098	0.0268922	0.0257521	0.0013597	0.00201617	0.00209573	0.040761	0.0564585	0.0539712	0.0338039	0.0182411	0.0267992	0.129707	0.139419	0.16987	0.0560685	0.0404094	0.026522	0.229383	0.17586	0.239955
D08	SYBR	Atp2a1	Unkn	spleen2	31.9
A09	SYBR	Atp2a1	Unkn	spleen3	32.28
B09	SYBR	Atp2a1	Unkn	spleen3	N/A
C09	SYBR	Atp2a1	Unkn	spleen3	31.72
D09	SYBR	Atp2a1	Unkn	spleen3	31.58
A10	SYBR	Atp2a1	Unkn	lung1	31.49
B10	SYBR	Atp2a1	Unkn	lung1	31.98
C10	SYBR	Atp2a1	Unkn	lung1	31.92
D10	SYBR	Atp2a1	Unkn	lung1	32.11
A11	SYBR	Atp2a1	Unkn	lung2	32.72
B11	SYBR	Atp2a1	Unkn	lung2	32.3
C11	SYBR	Atp2a1	Unkn	lung2	32.36
D11	SYBR	Atp2a1	Unkn	lung2	32.21
A12	SYBR	Atp2a1	Unkn	lung3	31.58
B12	SYBR	Atp2a1	Unkn	lung3	31.65
C12	SYBR	Atp2a1	Unkn	lung3	31.65
D12	SYBR	Atp2a1	Unkn	lung3	31.75
E01	SYBR	Atp2a1	Unkn	kidney1	29.85
F01	SYBR	Atp2a1	Unkn	kidney1	29.66
G01	SYBR	Atp2a1	Unkn	kidney1	29.45
H01	SYBR	Atp2a1	Unkn	kidney1	29.29
E02	SYBR	Atp2a1	Unkn	kidney2	29.56
F02	SYBR	Atp2a1	Unkn	kidney2	N/A
G02	SYBR	Atp2a1	Unkn	kidney2	29.74
H02	SYBR	Atp2a1	Unkn	kidney2	29.66
E03	SYBR	Atp2a1	Unkn	kidney3	28.98
F03	SYBR	Atp2a1	Unkn	kidney3	29.52
G03	SYBR	Atp2a1	Unkn	kidney3	29.44
H03	SYBR	Atp2a1	Unkn	kidney3	N/A
E04	SYBR	Atp2a1	Unkn	muscle1	25.94
F04	SYBR	Atp2a1	Unkn	muscle1	26.07
G04	SYBR	Atp2a1	Unkn	muscle1	25.96
H04	SYBR	Atp2a1	Unkn	muscle1	26.2
E05	SYBR	Atp2a1	Unkn	muscle2	25.54
F05	SYBR	Atp2a1	Unkn	muscle2	25.74
G05	SYBR	Atp2a1	Unkn	muscle2	25.55
H05	SYBR	Atp2a1	Unkn	muscle2	25.72
E06	SYBR	Atp2a1	Unkn	muscle3	26.49
F06	SYBR	Atp2a1	Unkn	muscle3	26.63
G06	SYBR	Atp2a1	Unkn	muscle3	26.44
H06	SYBR	Atp2a1	Unkn	muscle3	26.57
E07	SYBR	Atp2a1	Unkn	adipose1	N/A
F07	SYBR	Atp2a1	Unkn	adipose1	31.49
G07	SYBR	Atp2a1	Unkn	adipose1	31.46
H07	SYBR	Atp2a1	Unkn	adipose1	31.52
E08	SYBR	Atp2a1	Unkn	adipose2	32.01
F08	SYBR	Atp2a1	Unkn	adipose2	31.85
G08	SYBR	Atp2a1	Unkn	adipose2	31.34
H08	SYBR	Atp2a1	Unkn	adipose2	31.58
E09	SYBR	Atp2a1	Unkn	adipose3	31.77
F09	SYBR	Atp2a1	Unkn	adipose3	31.8
G09	SYBR	Atp2a1	Unkn	adipose3	31.56
H09	SYBR	Atp2a1	Unkn	adipose3	31.49
E10	SYBR	Atp2a1	Unkn	rumen1	30.66
F10	SYBR	Atp2a1	Unkn	rumen1	30.89
G10	SYBR	Atp2a1	Unkn	rumen1	30.76
H10	SYBR	Atp2a1	Unkn	rumen1	31.05
E11	SYBR	Atp2a1	Unkn	rumen2	31.2
F11	SYBR	Atp2a1	Unkn	rumen2	31.25
G11	SYBR	Atp2a1	Unkn	rumen2	N/A
H11	SYBR	Atp2a1	Unkn	rumen2	30.65
E12	SYBR	Atp2a1	Unkn	rumen3	30.61
F12	SYBR	Atp2a1	Unkn	rumen3	31.03
G12	SYBR	Atp2a1	Unkn	rumen3	30.61
H12	SYBR	Atp2a1	Unkn	rumen3	31.06

## Sheet: Lmod3
Well	Fluor	Target	Content	Sample	Cq
A01	SYBR	Lmod3	Unkn	heart1	29.75	31.7075	26.4275	5.28	1.7725	1.79667	3.48333	-0.0241667	0.0894154	1.01689	1.50131e-05
B01	SYBR	Lmod3	Unkn	heart1	32.47	31.2325	26.415	4.8175	1.8525		3.02083	0.0558333	0.123208	0.962039
C01	SYBR	Lmod3	Unkn	heart1	32.15	30.5625	26.35	4.2125	1.765		2.41583	-0.0316667	0.187397	1.02219
D01	SYBR	Lmod3	Unkn	heart1	32.46	30.11	21.7525	8.3575			6.56083		0.0105924	1.01689	9.00616e-07
A02	SYBR	Lmod3	Unkn	heart2	32.01	30.4025	22.38	8.0225			6.22583		0.013361	0.962039
B02	SYBR	Lmod3	Unkn	heart2	28.22	29.9425	22.48	7.4625			5.66583		0.0196976	1.02219
C02	SYBR	Lmod3	Unkn	heart2	31.49	31.01	27.285	3.725			1.92833		0.262733	1.01689	7.27527e-06
D02	SYBR	Lmod3	Unkn	heart2	33.21	31.1275	27.48	3.6475			1.85083		0.277232	0.962039
A03	SYBR	Lmod3	Unkn	heart3	30.5	31.23	27.28	3.95			2.15333		0.224793	1.02219
B03	SYBR	Lmod3	Unkn	heart3	32.35	32.465	26.62	5.845			4.04833		0.0604408	1.01689	1.69437e-06
C03	SYBR	Lmod3	Unkn	heart3	28.31	32.02	26.2525	5.7675			3.97083		0.0637764	0.962039
D03	SYBR	Lmod3	Unkn	heart3	31.09	31.3325	26.0675	5.265			3.46833		0.0903499	1.02219
A04	SYBR	Lmod3	Unkn	liver1	30.04	31.4425	26.2475	5.195			3.39833		0.0948418	1.01689	1.31764e-06
B04	SYBR	Lmod3	Unkn	liver1	30.55	31.89	26.4425	5.4475			3.65083		0.079614	0.962039
C04	SYBR	Lmod3	Unkn	liver1	30.36	31.6475	26.3875	5.26			3.46333		0.0906636	1.02219
D04	SYBR	Lmod3	Unkn	liver1	29.49	27.355	25.5825	1.7725			-0.0241667		1.01689	1.01689	1
A05	SYBR	Lmod3	Unkn	liver2	30.06	27.0675	25.215	1.8525			0.0558333		0.962039	0.962039
B05	SYBR	Lmod3	Unkn	liver2	30.77	28.075	26.31	1.765			-0.0316667		1.02219	1.02219
C05	SYBR	Lmod3	Unkn	liver2	30.68	29.2675	26.965	2.3025			0.505833		0.704253	1.01689	0.00242571
D05	SYBR	Lmod3	Unkn	liver2	30.1	29.425	26.6975	2.7275			0.930833		0.524555	0.962039
A06	SYBR	Lmod3	Unkn	liver3	29.96	28.725	26.05	2.675			0.878333		0.543996	1.02219
B06	SYBR	Lmod3	Unkn	liver3	29.21	31.5575	28.3475	3.21			1.41333		0.375443	1.01689	0.0079115
C06	SYBR	Lmod3	Unkn	liver3	29.71	31.12	28.1575	2.9625			1.16583		0.445707	0.962039
D06	SYBR	Lmod3	Unkn	liver3	30.89	30.7125	28.4	2.3125			0.515833		0.699389	1.02219
A07	SYBR	Lmod3	Unkn	spleen1	30.9
B07	SYBR	Lmod3	Unkn	spleen1	31.56
C07	SYBR	Lmod3	Unkn	spleen1	30.97
D07	SYBR	Lmod3	Unkn	spleen1	30.61
A08	SYBR	Lmod3	Unkn	spleen2	31.02
B08	SYBR	Lmod3	Unkn	spleen2	30.85
C08	SYBR	Lmod3	Unkn	spleen2	31.47
D08	SYBR	Lmod3	Unkn	spleen2	31.17
A09	SYBR	Lmod3	Unkn	spleen3	31.46			1.01689	0.962039	1.02219	0.0894154	0.123208	0.187397	0.0105924	0.013361	0.0196976	0.262733	0.277232	0.224793	0.0604408	0.0637764	0.0903499	0.0948418	0.079614	0.0906636	0.375443	0.445707	0.699389	0.704253	0.524555	0.543996
B09	SYBR	Lmod3	Unkn	spleen3	32.04
C09	SYBR	Lmod3	Unkn	spleen3	30.15
D09	SYBR	Lmod3	Unkn	spleen3	31.27
A10	SYBR	Lmod3	Unkn	lung1	33.1
B10	SYBR	Lmod3	Unkn	lung1	32.05
C10	SYBR	Lmod3	Unkn	lung1	32.33
D10	SYBR	Lmod3	Unkn	lung1	32.38
A11	SYBR	Lmod3	Unkn	lung2	32.13
B11	SYBR	Lmod3	Unkn	lung2	32.56
C11	SYBR	Lmod3	Unkn	lung2	31.83
D11	SYBR	Lmod3	Unkn	lung2	31.56
A12	SYBR	Lmod3	Unkn	lung3	31.65
B12	SYBR	Lmod3	Unkn	lung3	30.11
C12	SYBR	Lmod3	Unkn	lung3	32.05
D12	SYBR	Lmod3	Unkn	lung3	31.52
E01	SYBR	Lmod3	Unkn	kidney1	31.5
F01	SYBR	Lmod3	Unkn	kidney1	29.11
G01	SYBR	Lmod3	Unkn	kidney1	32.39
H01	SYBR	Lmod3	Unkn	kidney1	32.77
E02	SYBR	Lmod3	Unkn	kidney2	31.45
F02	SYBR	Lmod3	Unkn	kidney2	32.1
G02	SYBR	Lmod3	Unkn	kidney2	31.8
H02	SYBR	Lmod3	Unkn	kidney2	32.21
E03	SYBR	Lmod3	Unkn	kidney3	31.98
F03	SYBR	Lmod3	Unkn	kidney3	31.53
G03	SYBR	Lmod3	Unkn	kidney3	31.57
H03	SYBR	Lmod3	Unkn	kidney3	31.51
E04	SYBR	Lmod3	Unkn	muscle1	27.23
F04	SYBR	Lmod3	Unkn	muscle1	27.39
G04	SYBR	Lmod3	Unkn	muscle1	27.57
H04	SYBR	Lmod3	Unkn	muscle1	27.23
E05	SYBR	Lmod3	Unkn	muscle2	26.47
F05	SYBR	Lmod3	Unkn	muscle2	27.45
G05	SYBR	Lmod3	Unkn	muscle2	26.91
H05	SYBR	Lmod3	Unkn	muscle2	27.44
E06	SYBR	Lmod3	Unkn	muscle3	27.78
F06	SYBR	Lmod3	Unkn	muscle3	28.26
G06	SYBR	Lmod3	Unkn	muscle3	28.17
H06	SYBR	Lmod3	Unkn	muscle3	28.09
E07	SYBR	Lmod3	Unkn	adipose1	28.71
F07	SYBR	Lmod3	Unkn	adipose1	29.53
G07	SYBR	Lmod3	Unkn	adipose1	29.43
H07	SYBR	Lmod3	Unkn	adipose1	29.4
E08	SYBR	Lmod3	Unkn	adipose2	29.22
F08	SYBR	Lmod3	Unkn	adipose2	29.54
G08	SYBR	Lmod3	Unkn	adipose2	29.39
H08	SYBR	Lmod3	Unkn	adipose2	29.55
E09	SYBR	Lmod3	Unkn	adipose3	28.32
F09	SYBR	Lmod3	Unkn	adipose3	28.9
G09	SYBR	Lmod3	Unkn	adipose3	28.9
H09	SYBR	Lmod3	Unkn	adipose3	28.78
E10	SYBR	Lmod3	Unkn	rumen1	31.64
F10	SYBR	Lmod3	Unkn	rumen1	31.52
G10	SYBR	Lmod3	Unkn	rumen1	31.83
H10	SYBR	Lmod3	Unkn	rumen1	31.24
E11	SYBR	Lmod3	Unkn	rumen2	30.91
F11	SYBR	Lmod3	Unkn	rumen2	31.06
G11	SYBR	Lmod3	Unkn	rumen2	31.01
H11	SYBR	Lmod3	Unkn	rumen2	31.5
E12	SYBR	Lmod3	Unkn	rumen3	31.38
F12	SYBR	Lmod3	Unkn	rumen3	31.7
G12	SYBR	Lmod3	Unkn	rumen3	31.32
H12	SYBR	Lmod3	Unkn	rumen3	28.45

## Sheet: Mybpc2
Well	Fluor	Target	Content	Sample	Cq
A01	SYBR	Mybpc2	Unkn	heart1	34.79	34.64	26.4275	8.2125	2.64	2.6175	5.595	0.0225	0.0206889	0.984525	1.84761e-05
B01	SYBR	Mybpc2	Unkn	heart1	35.01	34.0275	26.415	7.6125	2.705		4.995	0.0875	0.0313585	0.941152
C01	SYBR	Mybpc2	Unkn	heart1	34.54	33.975	26.35	7.625	2.5075		5.0075	-0.11	0.031088	1.07923
D01	SYBR	Mybpc2	Unkn	heart1	34.22	30.2375	21.7525	8.485			5.8675		0.017128	0.984525	1.81967e-05
A02	SYBR	Mybpc2	Unkn	heart2	33.33	30.245	22.38	7.865			5.2475		0.0263236	0.941152
B02	SYBR	Mybpc2	Unkn	heart2	33.38	30.2275	22.48	7.7475			5.13		0.0285572	1.07923
C02	SYBR	Mybpc2	Unkn	heart2	35.04	31.9175	27.285	4.6325			2.015		0.247414	0.984525	4.99013e-05
D02	SYBR	Mybpc2	Unkn	heart2	34.36	32.1875	27.48	4.7075			2.09		0.234881	0.941152
A03	SYBR	Mybpc2	Unkn	heart3	34.16	31.9225	27.28	4.6425			2.025		0.245705	1.07923
B03	SYBR	Mybpc2	Unkn	heart3	34.24	33.85	26.62	7.23			4.6125		0.0408789	0.984525	2.56351e-05
C03	SYBR	Mybpc2	Unkn	heart3	33.97	33.43	26.2525	7.1775			4.56		0.0423939	0.941152
D03	SYBR	Mybpc2	Unkn	heart3	33.53	32.2575	26.0675	6.19			3.5725		0.0840563	1.07923
A04	SYBR	Mybpc2	Unkn	liver1	30.29	33.1875	26.2475	6.94			4.3225		0.0499802	0.984525	2.01816e-05
B04	SYBR	Mybpc2	Unkn	liver1	30.1	33.285	26.4425	6.8425			4.225		0.0534747	0.941152
C04	SYBR	Mybpc2	Unkn	liver1	30.25	33.235	26.3875	6.8475			4.23		0.0532897	1.07923
D04	SYBR	Mybpc2	Unkn	liver1	30.31	28.2225	25.5825	2.64			0.0225		0.984525	0.984525	1
A05	SYBR	Mybpc2	Unkn	liver2	30.27	27.92	25.215	2.705			0.0875		0.941152	0.941152
B05	SYBR	Mybpc2	Unkn	liver2	30.14	28.8175	26.31	2.5075			-0.11		1.07923	1.07923
C05	SYBR	Mybpc2	Unkn	liver2	30.24	30.7475	26.965	3.7825			1.165		0.445964	0.984525	0.00188292
D05	SYBR	Mybpc2	Unkn	liver2	30.33	30.3775	26.6975	3.68			1.0625		0.478802	0.941152
A06	SYBR	Mybpc2	Unkn	liver3	30.4	30.7025	26.05	4.6525			2.035		0.244008	1.07923
B06	SYBR	Mybpc2	Unkn	liver3	30.12	31.915	28.3475	3.5675			0.95		0.517632	0.984525	0.000473337
C06	SYBR	Mybpc2	Unkn	liver3	30.17	31.905	28.1575	3.7475			1.13		0.456916	0.941152
D06	SYBR	Mybpc2	Unkn	liver3	30.22	31.91	28.4	3.51			0.8925		0.53868	1.07923
A07	SYBR	Mybpc2	Unkn	spleen1	31.95
B07	SYBR	Mybpc2	Unkn	spleen1	31.75
C07	SYBR	Mybpc2	Unkn	spleen1	31.89
D07	SYBR	Mybpc2	Unkn	spleen1	32.08
A08	SYBR	Mybpc2	Unkn	spleen2	32.49
B08	SYBR	Mybpc2	Unkn	spleen2	32.04
C08	SYBR	Mybpc2	Unkn	spleen2	32.22
D08	SYBR	Mybpc2	Unkn	spleen2	32
A09	SYBR	Mybpc2	Unkn	spleen3	31.59
B09	SYBR	Mybpc2	Unkn	spleen3	32.28			0.984525	0.941152	1.07923	0.0206889	0.0313585	0.031088	0.017128	0.0263236	0.0285572	0.247414	0.234881	0.245705	0.0408789	0.0423939	0.0840563	0.0499802	0.0534747	0.0532897	0.517632	0.456916	0.53868	0.445964	0.478802	0.244008
C09	SYBR	Mybpc2	Unkn	spleen3	32.27
D09	SYBR	Mybpc2	Unkn	spleen3	31.55
A10	SYBR	Mybpc2	Unkn	lung1	33.22
B10	SYBR	Mybpc2	Unkn	lung1	33.76
C10	SYBR	Mybpc2	Unkn	lung1	33.62
D10	SYBR	Mybpc2	Unkn	lung1	34.8
A11	SYBR	Mybpc2	Unkn	lung2	33.38
B11	SYBR	Mybpc2	Unkn	lung2	34.47
C11	SYBR	Mybpc2	Unkn	lung2	32.7
D11	SYBR	Mybpc2	Unkn	lung2	33.17
A12	SYBR	Mybpc2	Unkn	lung3	32.08
B12	SYBR	Mybpc2	Unkn	lung3	31.91
C12	SYBR	Mybpc2	Unkn	lung3	32.47
D12	SYBR	Mybpc2	Unkn	lung3	32.57
A04	SYBR	Mybpc2	Unkn	kidney1	33.29
E01	SYBR	Mybpc2	Unkn	kidney1	33.21
F01	SYBR	Mybpc2	Unkn	kidney1	33.14
G01	SYBR	Mybpc2	Unkn	kidney1	33.11
H01	SYBR	Mybpc2	Unkn	kidney2	33.24
E02	SYBR	Mybpc2	Unkn	kidney2	33.31
F02	SYBR	Mybpc2	Unkn	kidney2	33.37
G02	SYBR	Mybpc2	Unkn	kidney2	33.22
H02	SYBR	Mybpc2	Unkn	kidney3	33.41
E03	SYBR	Mybpc2	Unkn	kidney3	33.1
F03	SYBR	Mybpc2	Unkn	kidney3	33.23
G03	SYBR	Mybpc2	Unkn	kidney3	33.2
E04	SYBR	Mybpc2	Unkn	muscle1	28.26
F04	SYBR	Mybpc2	Unkn	muscle1	28.1
G04	SYBR	Mybpc2	Unkn	muscle1	28.24
H04	SYBR	Mybpc2	Unkn	muscle1	28.29
E05	SYBR	Mybpc2	Unkn	muscle2	27.83
F05	SYBR	Mybpc2	Unkn	muscle2	27.91
G05	SYBR	Mybpc2	Unkn	muscle2	28.05
H05	SYBR	Mybpc2	Unkn	muscle2	27.89
E06	SYBR	Mybpc2	Unkn	muscle3	28.8
F06	SYBR	Mybpc2	Unkn	muscle3	28.96
G06	SYBR	Mybpc2	Unkn	muscle3	28.74
H06	SYBR	Mybpc2	Unkn	muscle3	28.77
E07	SYBR	Mybpc2	Unkn	adipose1	30.82
F07	SYBR	Mybpc2	Unkn	adipose1	30.94
G07	SYBR	Mybpc2	Unkn	adipose1	30.82
H07	SYBR	Mybpc2	Unkn	adipose1	30.41
E08	SYBR	Mybpc2	Unkn	adipose2	30.14
F08	SYBR	Mybpc2	Unkn	adipose2	30.49
G08	SYBR	Mybpc2	Unkn	adipose2	30.47
H08	SYBR	Mybpc2	Unkn	adipose2	30.41
E09	SYBR	Mybpc2	Unkn	adipose3	30.79
F09	SYBR	Mybpc2	Unkn	adipose3	30.85
G09	SYBR	Mybpc2	Unkn	adipose3	30.42
H09	SYBR	Mybpc2	Unkn	adipose3	30.75
E10	SYBR	Mybpc2	Unkn	rumen1	31.6
F10	SYBR	Mybpc2	Unkn	rumen1	32.01
G10	SYBR	Mybpc2	Unkn	rumen1	32.26
H10	SYBR	Mybpc2	Unkn	rumen1	31.79
E11	SYBR	Mybpc2	Unkn	rumen2	32.2
F11	SYBR	Mybpc2	Unkn	rumen2	31.23
G11	SYBR	Mybpc2	Unkn	rumen2	32.04
H11	SYBR	Mybpc2	Unkn	rumen2	32.15
E12	SYBR	Mybpc2	Unkn	rumen3	31.48
F12	SYBR	Mybpc2	Unkn	rumen3	32.18
G12	SYBR	Mybpc2	Unkn	rumen3	32.02
H12	SYBR	Mybpc2	Unkn	rumen3	31.96

## Sheet: Ryr1
Well	Fluor	Target	Content	Sample	Cq
A01	SYBR	Ryr1	Unkn	heart1	31.71	32.1075	26.4275	5.68	3.66	3.64667	2.03333	0.0133333	0.24429	0.990801	0.000105955
B01	SYBR	Ryr1	Unkn	heart1	32.38	32.2025	26.415	5.7875	3.7425		2.14083	0.0958333	0.226749	0.935732
C01	SYBR	Ryr1	Unkn	heart1	32.41	32.8025	26.35	6.4525	3.5375		2.80583	-0.109167	0.143008	1.07861
D01	SYBR	Ryr1	Unkn	heart1	31.93	30.4125	21.7525	8.66			5.01333		0.0309625	0.990801	2.10561e-05
A02	SYBR	Ryr1	Unkn	heart2	31.6	30.5	22.38	8.12			4.47333		0.0450187	0.935732
B02	SYBR	Ryr1	Unkn	heart2	32.52	30.7575	22.48	8.2775			4.63083		0.0403627	1.07861
C02	SYBR	Ryr1	Unkn	heart2	32.78	32.075	27.285	4.79			1.14333		0.452712	0.990801	0.000678033
D02	SYBR	Ryr1	Unkn	heart2	31.91	32.04	27.48	4.56			0.913333		0.530957	0.935732
A03	SYBR	Ryr1	Unkn	heart3	32.2	32.2575	27.28	4.9775			1.33083		0.397539	1.07861
B03	SYBR	Ryr1	Unkn	heart3	32.4	32.935	26.62	6.315			2.66833		0.157308	0.990801	0.000109743
C03	SYBR	Ryr1	Unkn	heart3	34.15	32.7425	26.2525	6.49			2.84333		0.139339	0.935732
D03	SYBR	Ryr1	Unkn	heart3	32.46	31.7125	26.0675	5.645			1.99833		0.250289	1.07861
A04	SYBR	Ryr1	Unkn	liver1	30.66	32.375	26.2475	6.1275			2.48083		0.179141	0.990801	0.00114408
B04	SYBR	Ryr1	Unkn	liver1	30.29	31.8375	26.4425	5.395			1.74833		0.297645	0.935732
C04	SYBR	Ryr1	Unkn	liver1	30.15	31.245	26.3875	4.8575			1.21083		0.432019	1.07861
D04	SYBR	Ryr1	Unkn	liver1	30.55	29.2425	25.5825	3.66			0.0133333		0.990801	0.990801	1
A05	SYBR	Ryr1	Unkn	liver2	30.58	28.9575	25.215	3.7425			0.0958333		0.935732	0.935732
B05	SYBR	Ryr1	Unkn	liver2	30.75	29.8475	26.31	3.5375			-0.109167		1.07861	1.07861
C05	SYBR	Ryr1	Unkn	liver2	30.14	32.1325	26.965	5.1675			1.52083		0.348485	0.990801	0.00355067
D05	SYBR	Ryr1	Unkn	liver2	30.53	31.395	26.6975	4.6975			1.05083		0.482689	0.935732
A06	SYBR	Ryr1	Unkn	liver3	30.8	32.6375	26.05	6.5875			2.94083		0.130233	1.07861
B06	SYBR	Ryr1	Unkn	liver3	30.82	32.565	28.3475	4.2175			0.570833		0.673228	0.990801	0.00191617
C06	SYBR	Ryr1	Unkn	liver3	30.31	32.6	28.1575	4.4425			0.795833		0.57601	0.935732
D06	SYBR	Ryr1	Unkn	liver3	31.1	32.67	28.4	4.27			0.623333		0.649169	1.07861
A07	SYBR	Ryr1	Unkn	spleen1	32.12
B07	SYBR	Ryr1	Unkn	spleen1	32
C07	SYBR	Ryr1	Unkn	spleen1	31.77
D07	SYBR	Ryr1	Unkn	spleen1	32.41
A08	SYBR	Ryr1	Unkn	spleen2	32.02
B08	SYBR	Ryr1	Unkn	spleen2	32.25
C08	SYBR	Ryr1	Unkn	spleen2	31.95
D08	SYBR	Ryr1	Unkn	spleen2	31.94
A09	SYBR	Ryr1	Unkn	spleen3	32.14
B09	SYBR	Ryr1	Unkn	spleen3	32.35
C09	SYBR	Ryr1	Unkn	spleen3	32.12			0.990801	0.935732	1.07861	0.24429	0.226749	0.143008	0.0309625	0.0450187	0.0403627	0.452712	0.530957	0.397539	0.157308	0.139339	0.250289	0.179141	0.297645	0.432019	0.673228	0.57601	0.649169	0.348485	0.482689	0.130233
D09	SYBR	Ryr1	Unkn	spleen3	32.42
A10	SYBR	Ryr1	Unkn	lung1	32.32
B10	SYBR	Ryr1	Unkn	lung1	32.97
C10	SYBR	Ryr1	Unkn	lung1	33.2
D10	SYBR	Ryr1	Unkn	lung1	33.25
A11	SYBR	Ryr1	Unkn	lung2	32.18
B11	SYBR	Ryr1	Unkn	lung2	33.36
C11	SYBR	Ryr1	Unkn	lung2	32.8
D11	SYBR	Ryr1	Unkn	lung2	32.63
A12	SYBR	Ryr1	Unkn	lung3	31.25
B12	SYBR	Ryr1	Unkn	lung3	31.82
C12	SYBR	Ryr1	Unkn	lung3	31.43
D12	SYBR	Ryr1	Unkn	lung3	32.35
E01	SYBR	Ryr1	Unkn	kidney1	31.58
F01	SYBR	Ryr1	Unkn	kidney1	32.93
G01	SYBR	Ryr1	Unkn	kidney1	32.63
H01	SYBR	Ryr1	Unkn	kidney1	32.36
E02	SYBR	Ryr1	Unkn	kidney2	30.19
F02	SYBR	Ryr1	Unkn	kidney2	33.5
G02	SYBR	Ryr1	Unkn	kidney2	31.71
H02	SYBR	Ryr1	Unkn	kidney2	31.95
E03	SYBR	Ryr1	Unkn	kidney3	29.07
F03	SYBR	Ryr1	Unkn	kidney3	31.72
G03	SYBR	Ryr1	Unkn	kidney3	30.33
H03	SYBR	Ryr1	Unkn	kidney3	33.86
E04	SYBR	Ryr1	Unkn	muscle1	29.15
F04	SYBR	Ryr1	Unkn	muscle1	29.49
G04	SYBR	Ryr1	Unkn	muscle1	29.22
H04	SYBR	Ryr1	Unkn	muscle1	29.11
E05	SYBR	Ryr1	Unkn	muscle2	29.04
F05	SYBR	Ryr1	Unkn	muscle2	28.75
G05	SYBR	Ryr1	Unkn	muscle2	29.01
H05	SYBR	Ryr1	Unkn	muscle2	29.03
E06	SYBR	Ryr1	Unkn	muscle3	29.85
F06	SYBR	Ryr1	Unkn	muscle3	29.92
G06	SYBR	Ryr1	Unkn	muscle3	29.76
H06	SYBR	Ryr1	Unkn	muscle3	29.86
E07	SYBR	Ryr1	Unkn	adipose1	32.02
F07	SYBR	Ryr1	Unkn	adipose1	32.12
G07	SYBR	Ryr1	Unkn	adipose1	32.33
H07	SYBR	Ryr1	Unkn	adipose1	32.06
E08	SYBR	Ryr1	Unkn	adipose2	30.9
F08	SYBR	Ryr1	Unkn	adipose2	31.43
G08	SYBR	Ryr1	Unkn	adipose2	31.45
H08	SYBR	Ryr1	Unkn	adipose2	31.8
E09	SYBR	Ryr1	Unkn	adipose3	32.14
F09	SYBR	Ryr1	Unkn	adipose3	32.69
G09	SYBR	Ryr1	Unkn	adipose3	32.69
H09	SYBR	Ryr1	Unkn	adipose3	33.03
E10	SYBR	Ryr1	Unkn	rumen1	32.53
F10	SYBR	Ryr1	Unkn	rumen1	32.72
G10	SYBR	Ryr1	Unkn	rumen1	32.43
H10	SYBR	Ryr1	Unkn	rumen1	32.58
E11	SYBR	Ryr1	Unkn	rumen2	32.9
F11	SYBR	Ryr1	Unkn	rumen2	32.64
G11	SYBR	Ryr1	Unkn	rumen2	32.55
H11	SYBR	Ryr1	Unkn	rumen2	32.31
E12	SYBR	Ryr1	Unkn	rumen3	32.52
F12	SYBR	Ryr1	Unkn	rumen3	32.23
G12	SYBR	Ryr1	Unkn	rumen3	32.76
H12	SYBR	Ryr1	Unkn	rumen3	33.17

## Sheet: Tmod4
Well	Fluor	Target	Content	Sample	Cq
A01	SYBR	Tmod4	Unkn	heart1	30.73	31.0375	26.4275	4.61	-1.1375	-1.05083	5.66083	-0.0866667	0.019766	1.06191	8.7098e-06
B01	SYBR	Tmod4	Unkn	heart1	31.35	30.915	26.415	4.5	-0.9675		5.55083	0.0833333	0.0213321	0.943874
C01	SYBR	Tmod4	Unkn	heart1	31.05	31.3325	26.35	4.9825	-1.0475		6.03333	0.00333333	0.0152681	0.997692
D01	SYBR	Tmod4	Unkn	heart1	31.02	28.88	21.7525	7.1275			8.17833		0.00345204	1.06191	8.31808e-06
A02	SYBR	Tmod4	Unkn	heart2	30.51	28.1775	22.38	5.7975			6.84833		0.00867853	0.943874
B02	SYBR	Tmod4	Unkn	heart2	31.2	28.1367	22.48	5.65667			6.7075		0.00956844	0.997692
C02	SYBR	Tmod4	Unkn	heart2	30.75	30.6775	27.285	3.3925			4.44333		0.0459646	1.06191	1.01507e-05
D02	SYBR	Tmod4	Unkn	heart2	31.2	30.52	27.48	3.04			4.09083		0.0586863	0.943874
A03	SYBR	Tmod4	Unkn	heart3	30.95	30.605	27.28	3.325			4.37583		0.0481663	0.997692
B03	SYBR	Tmod4	Unkn	heart3	31.06	32.0475	26.62	5.4275			6.47833		0.0112157	1.06191	8.5349e-06
C03	SYBR	Tmod4	Unkn	heart3	31.3	31.7775	26.2525	5.525			6.57583		0.0104828	0.943874
D03	SYBR	Tmod4	Unkn	heart3	32.02	30.8525	26.0675	4.785			5.83583		0.0175081	0.997692
A04	SYBR	Tmod4	Unkn	liver1	28.68	26.66	26.2475	0.4125			1.46333		0.362654	1.06191	0.000148625
B04	SYBR	Tmod4	Unkn	liver1	28.98	27.03	26.4425	0.5875			1.63833		0.321227	0.943874
C04	SYBR	Tmod4	Unkn	liver1	28.98	27.3867	26.3875	0.999167			2.05		0.241484	0.997692
D04	SYBR	Tmod4	Unkn	liver1	28.88	24.445	25.5825	-1.1375			-0.0866667		1.06191	1.06191	1
A05	SYBR	Tmod4	Unkn	liver2	28.02	24.2475	25.215	-0.9675			0.0833333		0.943874	0.943874
B05	SYBR	Tmod4	Unkn	liver2	28.18	25.2625	26.31	-1.0475			0.00333333		0.997692	0.997692
C05	SYBR	Tmod4	Unkn	liver2	28.37	27.3675	26.965	0.4025			1.45333		0.365177	1.06191	0.000118927
D05	SYBR	Tmod4	Unkn	liver2	28.14	27.0325	26.6975	0.335			1.38583		0.382668	0.943874
A06	SYBR	Tmod4	Unkn	liver3	27.42	26.1875	26.05	0.1375			1.18833		0.43881	0.997692
B06	SYBR	Tmod4	Unkn	liver3	28.68	29.94	28.3475	1.5925			2.64333		0.160058	1.06191	2.61439e-05
C06	SYBR	Tmod4	Unkn	liver3	28.31	29.8625	28.1575	1.705			2.75583		0.148051	0.943874
D06	SYBR	Tmod4	Unkn	liver3	N/A	30.765	28.4	2.365			3.41583		0.0936983	0.997692
A07	SYBR	Tmod4	Unkn	spleen1	30.31
B07	SYBR	Tmod4	Unkn	spleen1	31.24
C07	SYBR	Tmod4	Unkn	spleen1	30.12
D07	SYBR	Tmod4	Unkn	spleen1	31.04
A08	SYBR	Tmod4	Unkn	spleen2	30.61
B08	SYBR	Tmod4	Unkn	spleen2	30.45
C08	SYBR	Tmod4	Unkn	spleen2	30.53
D08	SYBR	Tmod4	Unkn	spleen2	30.49
A09	SYBR	Tmod4	Unkn	spleen3	30.57
B09	SYBR	Tmod4	Unkn	spleen3	30.9
C09	SYBR	Tmod4	Unkn	spleen3	30.46			1.06191	0.943874	0.997692	0.019766	0.0213321	0.0152681	0.00345204	0.00867853	0.00956844	0.0459646	0.0586863	0.0481663	0.0112157	0.0104828	0.0175081	0.362654	0.321227	0.241484	0.160058	0.148051	0.0936983	0.365177	0.382668	0.43881
D09	SYBR	Tmod4	Unkn	spleen3	30.49
A10	SYBR	Tmod4	Unkn	lung1	32.33
B10	SYBR	Tmod4	Unkn	lung1	31.89
C10	SYBR	Tmod4	Unkn	lung1	31.46
D10	SYBR	Tmod4	Unkn	lung1	32.51
A11	SYBR	Tmod4	Unkn	lung2	31.64
B11	SYBR	Tmod4	Unkn	lung2	32.21
C11	SYBR	Tmod4	Unkn	lung2	31.82
D11	SYBR	Tmod4	Unkn	lung2	31.44
A12	SYBR	Tmod4	Unkn	lung3	30.96
B12	SYBR	Tmod4	Unkn	lung3	31.06
C12	SYBR	Tmod4	Unkn	lung3	30.41
D12	SYBR	Tmod4	Unkn	lung3	30.98
E01	SYBR	Tmod4	Unkn	kidney1	26.9
F01	SYBR	Tmod4	Unkn	kidney1	26.18
G01	SYBR	Tmod4	Unkn	kidney1	26.57
H01	SYBR	Tmod4	Unkn	kidney1	26.99
E02	SYBR	Tmod4	Unkn	kidney2	27.1
F02	SYBR	Tmod4	Unkn	kidney2	27.09
G02	SYBR	Tmod4	Unkn	kidney2	26.9
H02	SYBR	Tmod4	Unkn	kidney2	N/A
E03	SYBR	Tmod4	Unkn	kidney3	27.25
F03	SYBR	Tmod4	Unkn	kidney3	27.61
G03	SYBR	Tmod4	Unkn	kidney3	27.3
H03	SYBR	Tmod4	Unkn	kidney3	N/A
E04	SYBR	Tmod4	Unkn	muscle1	24.36
F04	SYBR	Tmod4	Unkn	muscle1	24.54
G04	SYBR	Tmod4	Unkn	muscle1	24.31
H04	SYBR	Tmod4	Unkn	muscle1	24.57
E05	SYBR	Tmod4	Unkn	muscle2	24.14
F05	SYBR	Tmod4	Unkn	muscle2	24.33
G05	SYBR	Tmod4	Unkn	muscle2	24.23
H05	SYBR	Tmod4	Unkn	muscle2	24.29
E06	SYBR	Tmod4	Unkn	muscle3	25.15
F06	SYBR	Tmod4	Unkn	muscle3	25.33
G06	SYBR	Tmod4	Unkn	muscle3	25.24
H06	SYBR	Tmod4	Unkn	muscle3	25.33
E07	SYBR	Tmod4	Unkn	adipose1	27.22
F07	SYBR	Tmod4	Unkn	adipose1	27.3
G07	SYBR	Tmod4	Unkn	adipose1	27.44
H07	SYBR	Tmod4	Unkn	adipose1	27.51
E08	SYBR	Tmod4	Unkn	adipose2	26.91
F08	SYBR	Tmod4	Unkn	adipose2	27.08
G08	SYBR	Tmod4	Unkn	adipose2	27.08
H08	SYBR	Tmod4	Unkn	adipose2	27.06
E09	SYBR	Tmod4	Unkn	adipose3	26.12
F09	SYBR	Tmod4	Unkn	adipose3	26.18
G09	SYBR	Tmod4	Unkn	adipose3	26.22
H09	SYBR	Tmod4	Unkn	adipose3	26.23
E10	SYBR	Tmod4	Unkn	rumen1	30.1
F10	SYBR	Tmod4	Unkn	rumen1	29.99
G10	SYBR	Tmod4	Unkn	rumen1	29.66
H10	SYBR	Tmod4	Unkn	rumen1	30.01
E11	SYBR	Tmod4	Unkn	rumen2	29.63
F11	SYBR	Tmod4	Unkn	rumen2	29.93
G11	SYBR	Tmod4	Unkn	rumen2	29.43
H11	SYBR	Tmod4	Unkn	rumen2	30.46
E12	SYBR	Tmod4	Unkn	rumen3	30.27
F12	SYBR	Tmod4	Unkn	rumen3	30.56
G12	SYBR	Tmod4	Unkn	rumen3	30.75
H12	SYBR	Tmod4	Unkn	rumen3	31.48

## Sheet: GAPDH
Well	Fluor	Target	Content	Sample	Cq
A01	SYBR	GAPDH	Unkn	heart1	26.36	26.4275
B01	SYBR	GAPDH	Unkn	heart1	26.48	26.415
C01	SYBR	GAPDH	Unkn	heart1	26.37	26.35
D01	SYBR	GAPDH	Unkn	heart1	26.5	21.7525
A02	SYBR	GAPDH	Unkn	heart2	26.36	22.38
B02	SYBR	GAPDH	Unkn	heart2	26.49	22.48
C02	SYBR	GAPDH	Unkn	heart2	26.24	27.285
D02	SYBR	GAPDH	Unkn	heart2	26.57	27.48
A03	SYBR	GAPDH	Unkn	heart3	26.33	27.28
B03	SYBR	GAPDH	Unkn	heart3	26.43	26.62
C03	SYBR	GAPDH	Unkn	heart3	26.28	26.2525
D03	SYBR	GAPDH	Unkn	heart3	26.36	26.0675
A04	SYBR	GAPDH	Unkn	liver1	21.67	26.2475
B04	SYBR	GAPDH	Unkn	liver1	21.81	26.4425
C04	SYBR	GAPDH	Unkn	liver1	21.69	26.3875
D04	SYBR	GAPDH	Unkn	liver1	21.84	25.5825
A05	SYBR	GAPDH	Unkn	liver2	22.24	25.215
B05	SYBR	GAPDH	Unkn	liver2	22.46	26.31
C05	SYBR	GAPDH	Unkn	liver2	22.33	26.965
D05	SYBR	GAPDH	Unkn	liver2	22.49	26.6975
A06	SYBR	GAPDH	Unkn	liver3	22.39	26.05
B06	SYBR	GAPDH	Unkn	liver3	22.52	28.3475
C06	SYBR	GAPDH	Unkn	liver3	22.44	28.1575
D06	SYBR	GAPDH	Unkn	liver3	22.57	28.4
A07	SYBR	GAPDH	Unkn	spleen1	27.33
B07	SYBR	GAPDH	Unkn	spleen1	27.4
C07	SYBR	GAPDH	Unkn	spleen1	27.38
D07	SYBR	GAPDH	Unkn	spleen1	27.03
A08	SYBR	GAPDH	Unkn	spleen2	27.47
B08	SYBR	GAPDH	Unkn	spleen2	27.36
C08	SYBR	GAPDH	Unkn	spleen2	27.43
D08	SYBR	GAPDH	Unkn	spleen2	27.66
A09	SYBR	GAPDH	Unkn	spleen3	26.95
B09	SYBR	GAPDH	Unkn	spleen3	27.65
C09	SYBR	GAPDH	Unkn	spleen3	27.21
D09	SYBR	GAPDH	Unkn	spleen3	27.31
A10	SYBR	GAPDH	Unkn	lung1	26.69
B10	SYBR	GAPDH	Unkn	lung1	26.48
C10	SYBR	GAPDH	Unkn	lung1	26.59
D10	SYBR	GAPDH	Unkn	lung1	26.72
A11	SYBR	GAPDH	Unkn	lung2	26.44
B11	SYBR	GAPDH	Unkn	lung2	26.22
C11	SYBR	GAPDH	Unkn	lung2	25.92
D11	SYBR	GAPDH	Unkn	lung2	26.43
A12	SYBR	GAPDH	Unkn	lung3	26.05
B12	SYBR	GAPDH	Unkn	lung3	26.2
C12	SYBR	GAPDH	Unkn	lung3	26.01
D12	SYBR	GAPDH	Unkn	lung3	26.01
E01	SYBR	GAPDH	Unkn	kidney1	26.7
F01	SYBR	GAPDH	Unkn	kidney1	26.1
G01	SYBR	GAPDH	Unkn	kidney1	26.16
H01	SYBR	GAPDH	Unkn	kidney1	26.03
E02	SYBR	GAPDH	Unkn	kidney2	26.15
F02	SYBR	GAPDH	Unkn	kidney2	26.55
G02	SYBR	GAPDH	Unkn	kidney2	26.54
H02	SYBR	GAPDH	Unkn	kidney2	26.53
E03	SYBR	GAPDH	Unkn	kidney3	26.53
F03	SYBR	GAPDH	Unkn	kidney3	26.3
G03	SYBR	GAPDH	Unkn	kidney3	26.39
H03	SYBR	GAPDH	Unkn	kidney3	26.33
E04	SYBR	GAPDH	Unkn	muscle1	25.44
F04	SYBR	GAPDH	Unkn	muscle1	25.61
G04	SYBR	GAPDH	Unkn	muscle1	25.44
H04	SYBR	GAPDH	Unkn	muscle1	25.84
E05	SYBR	GAPDH	Unkn	muscle2	25.09
F05	SYBR	GAPDH	Unkn	muscle2	25.2
G05	SYBR	GAPDH	Unkn	muscle2	25.25
H05	SYBR	GAPDH	Unkn	muscle2	25.32
E06	SYBR	GAPDH	Unkn	muscle3	26.27
F06	SYBR	GAPDH	Unkn	muscle3	26.37
G06	SYBR	GAPDH	Unkn	muscle3	26.3
H06	SYBR	GAPDH	Unkn	muscle3	26.3
E07	SYBR	GAPDH	Unkn	adipose1	26.79
F07	SYBR	GAPDH	Unkn	adipose1	27.03
G07	SYBR	GAPDH	Unkn	adipose1	26.94
H07	SYBR	GAPDH	Unkn	adipose1	27.1
E08	SYBR	GAPDH	Unkn	adipose2	26.66
F08	SYBR	GAPDH	Unkn	adipose2	26.92
G08	SYBR	GAPDH	Unkn	adipose2	26.58
H08	SYBR	GAPDH	Unkn	adipose2	26.63
E09	SYBR	GAPDH	Unkn	adipose3	25.99
F09	SYBR	GAPDH	Unkn	adipose3	26.06
G09	SYBR	GAPDH	Unkn	adipose3	26.1
H09	SYBR	GAPDH	Unkn	adipose3	26.05
E10	SYBR	GAPDH	Unkn	rumen1	28.34
F10	SYBR	GAPDH	Unkn	rumen1	28.45
G10	SYBR	GAPDH	Unkn	rumen1	28.26
H10	SYBR	GAPDH	Unkn	rumen1	28.34
E11	SYBR	GAPDH	Unkn	rumen2	28.19
F11	SYBR	GAPDH	Unkn	rumen2	28.18
G11	SYBR	GAPDH	Unkn	rumen2	28.16
H11	SYBR	GAPDH	Unkn	rumen2	28.1
E12	SYBR	GAPDH	Unkn	rumen3	28.38
F12	SYBR	GAPDH	Unkn	rumen3	28.4
G12	SYBR	GAPDH	Unkn	rumen3	28.34
H12	SYBR	GAPDH	Unkn	rumen3	28.48
