# Supplementary material for: Identification of key genes in bovine muscle development by co-expression analysis
Source: PeerJ. 2023 Apr 12;11:e15093. doi: 10.7717/peerj.15093 (PMC10105563; doi:10.7717/peerj.15093)
Supplement: Supplemental Information 4 [file peerj-11-15093-s004.xlsx]

## Sheet: Expression matrix
	SRR10174861	SRR10174862	SRR10174863	SRR10174870	SRR10174871	SRR10174872	SRR10174873	SRR10174874	SRR10174881	SRR10174882	SRR10174883	SRR10174884	SRR10174885	SRR10174887	SRR10174888	SRR10174889	SRR10174891	SRR10174892	SRR10174893	SRR10174894	SRR10174895	SRR10174896	SRR10174898	SRR10174899	SRR10174900	SRR10174901	SRR10174902	SRR10174903	SRR10174911	SRR10174912	SRR10174913	SRR10174914	SRR10174915	SRR10174916	SRR10174917	SRR10174918	SRR10174919
ENSBTAG00000006648	1	1	7	0	0	0	0	2	1	2	1	0	1	2	0	0	0	0	0	0	0	0	0	2	2	3	0	2	1	0	0	0	6	0	1	0	0
ENSBTAG00000049697	0	0	0	0	0	0	0	0	0	0	0	0	0	0	0	0	0	0	0	0	0	0	0	0	0	0	0	0	0	0	0	0	0	0	0	0	0
ENSBTAG00000047028	0	0	0	0	0	0	0	0	0	0	0	0	0	0	0	0	0	0	0	0	0	0	0	0	0	0	0	0	0	0	0	0	0	0	0	0	0
ENSBTAG00000053686	0	0	0	0	0	0	0	0	0	0	0	0	0	0	0	0	0	0	0	0	0	0	0	2	0	0	0	2	0	0	0	0	0	0	0	0	0
ENSBTAG00000054829	7	8	15	32	11	10	6	37	85	79	83	10	70	0	0	0	0	0	0	0	0	0	1	0	3	1	3	6	4	2	10	4	29	0	5	0	3
ENSBTAG00000046619	0	0	0	0	0	0	0	0	0	0	0	0	0	0	2	0	0	0	0	0	0	0	0	2	0	1	0	0	0	0	0	0	0	0	0	0	0
ENSBTAG00000001753	0	6	0	0	0	0	0	0	32	57	26	7	58	0	6	0	0	4	0	0	0	0	0	1539	1122	1202	329	1144	0	0	0	3	0	0	0	0	0
ENSBTAG00000020035	953	701	1299	3407	1680	3004	271	1216	9156	2890	1607	350	1420	306	1988	575	435	1658	488	68	431	46	449	1377	1689	948	284	887	2904	439	2331	2819	2774	696	763	372	575
ENSBTAG00000005540	0	0	0	0	0	0	0	0	0	0	0	0	0	0	0	0	0	0	0	0	0	0	1	0	0	0	0	0	0	0	0	0	0	1	0	0	0
ENSBTAG00000001150	0	1	0	7651	6710	8120	1738	7333	1280	1962	267	39	229	0	3	2	0	0	0	0	0	0	0	5	12	6	0	10	0	0	0	0	0	16	12	24	2
ENSBTAG00000026259	0	0	0	2	0	1	0	0	0	2	0	0	0	0	0	0	0	0	0	0	0	0	0	0	0	0	0	0	0	0	0	0	0	0	0	0	0
ENSBTAG00000051226	0	0	0	0	0	0	0	0	61	57	6	6	31	0	1	0	0	0	0	0	0	0	0	0	0	2	0	0	0	0	0	0	0	0	0	0	0
ENSBTAG00000013841	4	0	0	0	0	1	0	0	0	0	2	0	2	0	0	0	2	0	0	0	0	0	0	0	0	1	2	0	0	0	0	0	0	2	0	0	5
ENSBTAG00000011528	346	378	230	1429	1064	2103	233	1191	1114	702	646	126	668	305	1688	206	336	1369	321	36	174	57	176	244	267	518	50	179	434	34	253	570	301	338	309	506	402
ENSBTAG00000026260	0	0	0	115	54	145	7	36	2	2	0	1	2	0	0	0	0	0	0	0	0	0	0	0	0	0	1	0	0	0	0	0	0	0	0	8	0
ENSBTAG00000054497	0	2	1	2	0	0	0	2	6	0	0	0	0	0	0	0	0	0	0	0	0	0	0	4	3	4	0	0	3	0	0	0	0	0	1	0	0
ENSBTAG00000012594	1289	1520	1065	12691	10216	16900	2403	11454	2211	1700	1275	259	1088	116	615	120	105	393	587	47	300	69	351	546	832	946	112	488	2256	244	1481	2470	1908	1062	1182	1172	1146
ENSBTAG00000049850	0	0	0	0	0	0	0	0	0	0	0	0	0	0	0	0	0	0	0	0	0	0	0	0	0	0	0	0	0	0	0	0	0	0	0	0	0
ENSBTAG00000018278	4705	4002	2611	41264	32599	54793	8588	41792	13373	7979	6695	1448	6489	876	5663	1740	1626	6238	4306	422	2426	591	3351	2154	2314	3564	482	1632	7928	1208	7290	10277	7268	2625	2668	3153	2893
ENSBTAG00000021997	2274	1958	1998	450	678	500	98	459	1846	1014	742	189	769	71	515	117	98	346	1171	117	771	116	750	2079	2623	1497	476	1539	597	31	231	412	262	933	1188	1028	728
ENSBTAG00000054338	0	0	0	0	0	0	0	0	0	0	0	0	0	0	0	0	0	0	0	0	0	0	0	0	0	0	0	0	0	0	0	0	0	0	0	0	0
ENSBTAG00000053248	3	3	0	0	0	2	0	0	0	0	0	0	0	0	0	0	0	1	0	0	1	0	0	1	3	2	0	2	6	0	0	0	0	3	3	0	6
ENSBTAG00000008490	290	378	377	694	715	994	205	1049	921	465	447	109	515	53	307	91	82	365	222	34	162	19	209	454	472	796	143	507	346	38	288	404	244	538	494	626	580
ENSBTAG00000035175	258	228	217	198	189	162	42	109	497	340	234	47	207	36	178	53	30	146	410	51	331	80	304	420	334	420	79	206	382	34	311	276	194	441	355	328	236
ENSBTAG00000008482	6906	8059	7374	2479	3666	2908	462	1987	14040	7684	7123	1594	6338	662	3983	1006	1017	3571	4871	496	3377	579	3245	11593	12382	13158	2486	8683	5626	671	4106	4742	3376	12078	11587	9133	9384
ENSBTAG00000052933	0	0	0	0	0	0	0	0	0	0	0	0	0	0	0	0	0	0	0	0	0	0	0	0	0	0	0	0	0	0	0	0	0	0	0	0	0
ENSBTAG00000009188	1747	1064	945	873	854	1082	147	609	3662	1920	1894	362	1462	129	653	170	120	541	1522	179	1103	202	1175	1587	1841	1889	321	1170	1094	161	972	1323	870	1633	1796	1532	1297
ENSBTAG00000009187	186	61	96	393	322	333	98	403	622	353	288	65	302	67	375	48	122	411	231	26	119	35	172	97	139	72	19	73	194	18	164	172	130	118	66	69	98
ENSBTAG00000001258	1378	1172	1072	665	785	784	91	647	1643	769	692	172	775	53	350	88	119	268	731	74	358	83	393	1570	1602	2196	310	1247	2231	275	1836	2661	2319	1629	1634	1852	1479
ENSBTAG00000043399	2	3	0	0	0	0	0	0	1	0	0	0	0	1	1	0	0	0	2	0	0	0	0	4	2	3	1	0	1	0	1	4	0	0	0	7	0
ENSBTAG00000012899	2813	3615	3081	1874	1660	1896	236	1288	1434	953	677	197	688	191	1074	200	199	838	6755	840	4905	1070	5730	3036	4107	3811	759	2550	3643	460	2942	4420	3143	2477	3974	3257	2972
ENSBTAG00000021819	1666	1200	1516	500	619	379	49	317	1268	771	719	142	559	8	95	51	25	115	1660	229	1103	150	1161	3387	3724	2211	723	2417	605	140	754	807	473	2922	3057	1999	2261
ENSBTAG00000019404	619	544	450	379	414	371	71	323	942	591	516	88	512	24	131	33	33	148	653	70	419	88	553	830	996	1018	192	666	815	121	686	874	794	852	968	936	814
ENSBTAG00000015212	890	1123	1122	391	520	383	51	271	535	344	300	86	380	25	95	11	8	60	1306	95	694	161	888	1135	1474	1619	311	941	368	32	265	422	159	1693	1624	1943	1916
ENSBTAG00000051429	0	0	0	0	0	0	0	0	0	0	0	0	0	0	0	0	0	0	0	0	0	0	0	0	0	0	0	0	0	0	0	0	0	0	0	0	0
ENSBTAG00000051548	0	0	0	0	0	0	0	0	0	0	0	0	0	0	0	0	0	0	0	0	0	0	0	0	0	0	0	0	0	0	0	0	0	0	0	0	0
ENSBTAG00000037547	0	0	33	2	1	0	0	5	0	4	4	0	2	0	0	2	0	2	0	0	0	0	0	0	2	0	2	4	10	0	0	4	6	4	0	4	3
ENSBTAG00000054023	2	0	0	0	0	0	0	0	0	0	0	0	0	0	0	0	0	0	2	0	0	0	0	21	6	23	1	13	0	0	0	0	0	32	27	31	42
ENSBTAG00000049136	2	2	3	0	0	0	0	0	0	0	0	0	0	0	0	0	0	1	0	0	0	0	0	0	0	0	2	4	2	0	0	2	0	2	0	0	4
ENSBTAG00000043993	5	8	20	6	2	6	0	0	106	63	46	6	38	0	1	0	2	6	51	6	64	4	55	12	13	18	0	5	12	4	24	13	17	33	35	37	12
ENSBTAG00000003064	821	894	978	418	598	579	125	530	1626	878	749	208	885	102	476	121	84	356	833	117	602	113	574	1804	1522	1962	345	1223	904	130	643	748	489	2597	2074	1664	1498
ENSBTAG00000003063	556	687	768	214	287	253	25	182	1515	979	710	160	623	32	241	37	51	195	568	96	401	53	306	1228	1384	1085	281	1014	454	45	295	403	235	1574	1790	1363	1427
ENSBTAG00000035493	0	0	0	0	0	0	0	0	0	0	0	0	0	0	0	0	0	0	0	0	0	0	0	0	0	0	0	0	0	0	0	0	0	0	0	0	0
ENSBTAG00000003059	1191	1377	1314	1094	1216	1400	254	979	3449	2341	1661	406	1720	101	696	121	126	536	873	79	657	113	667	1969	2204	2561	532	1617	1434	206	879	1234	1059	1714	1659	1449	1374
ENSBTAG00000017310	171	196	254	96	115	146	19	78	62	64	30	11	38	7	55	12	4	19	129	9	43	18	51	550	249	272	65	173	189	60	366	157	215	111	186	228	201
ENSBTAG00000012412	707	600	697	297	422	295	31	180	762	504	353	47	297	50	232	43	51	212	512	67	329	51	349	1221	1202	1401	259	802	566	101	545	572	313	1452	1764	1045	971
ENSBTAG00000023718	3	0	0	0	0	1	0	2	9	6	6	1	7	0	2	0	0	0	13	2	10	4	12	46	18	21	8	42	4	2	6	2	3	8	5	3	4
ENSBTAG00000016619	46	10	24	27	27	26	4	19	104	42	22	0	8	0	2	2	0	2	31	0	17	4	10	86	52	45	10	34	117	26	121	152	84	122	159	112	97
ENSBTAG00000020762	81	133	90	90	87	90	14	41	1054	743	418	123	429	0	10	2	7	8	11	4	15	3	15	88	98	34	27	70	25	3	4	37	10	27	58	21	24
ENSBTAG00000018855	717	817	813	342	415	314	57	248	1687	1124	820	185	804	62	445	89	85	298	569	53	392	72	406	1477	1744	1276	303	1063	764	135	635	555	523	1299	1595	1116	1139
ENSBTAG00000018854	5639	5145	4580	6429	5454	8534	1229	6057	32462	18259	18820	4542	19615	534	3317	952	708	2836	39642	4584	27517	5949	28471	7313	7064	12073	1995	6756	2433	220	1479	2636	1446	4766	4060	5563	5222
ENSBTAG00000051337	0	0	1	0	0	0	0	0	13	4	5	0	3	0	4	0	0	0	0	0	0	0	0	22	7	4	2	10	30	3	8	33	10	2	0	0	0
ENSBTAG00000017839	564	334	471	6	39	10	4	3	125	100	95	13	32	2	19	0	2	11	13	0	7	0	3	202	163	51	30	131	801	111	668	774	517	97	107	46	57
ENSBTAG00000044299	0	0	0	0	0	0	0	0	0	0	0	0	0	0	0	0	0	0	0	0	0	0	0	0	0	0	0	0	0	0	0	0	0	0	0	0	0
ENSBTAG00000046072	0	0	0	0	0	0	0	0	0	0	0	0	0	0	0	0	0	0	0	0	0	0	0	0	0	0	0	0	0	0	0	0	0	0	0	0	0
ENSBTAG00000048631	861	1053	980	37	79	28	9	16	189	124	166	17	84	4	34	6	3	18	45	4	32	4	28	475	269	263	55	206	1298	177	1011	1379	901	630	606	395	351
ENSBTAG00000034869	0	0	0	0	0	0	0	0	0	0	0	0	0	0	0	0	0	0	0	0	0	0	0	0	0	0	0	0	0	0	0	0	0	0	0	0	0
ENSBTAG00000046804	0	0	0	0	0	0	0	0	0	0	0	0	0	0	0	0	0	0	0	0	0	0	0	0	0	0	0	0	0	0	0	0	0	0	0	0	0
ENSBTAG00000015812	0	0	0	0	0	0	0	0	0	0	0	0	0	0	0	0	0	0	0	0	0	0	0	0	0	0	0	0	0	0	0	0	0	0	0	0	0
ENSBTAG00000048503	0	0	0	0	0	0	0	0	0	0	0	0	0	0	0	0	0	0	0	0	0	0	0	0	0	0	0	0	0	0	0	0	0	0	0	0	0
ENSBTAG00000050662	0	0	0	0	0	0	0	0	0	0	0	0	0	0	0	0	0	0	0	0	0	0	0	0	0	0	0	0	0	0	0	0	0	0	0	0	0
ENSBTAG00000054173	0	0	0	0	0	0	0	0	0	0	0	0	0	0	0	0	0	0	0	0	0	0	0	0	0	0	0	0	0	0	0	0	0	0	0	0	0
ENSBTAG00000049506	0	0	0	0	0	0	0	0	0	0	0	0	0	0	0	0	0	0	0	0	0	0	0	0	0	0	0	0	0	0	0	0	0	0	0	0	0
ENSBTAG00000049468	0	0	0	0	0	0	0	0	0	0	0	0	0	0	0	0	0	0	0	0	0	0	0	0	0	0	0	0	0	0	0	0	0	0	0	0	0
ENSBTAG00000052340	0	0	0	0	0	0	0	0	0	0	0	0	0	0	0	0	0	0	0	0	0	0	0	0	0	0	0	0	0	0	0	0	0	0	0	0	0
ENSBTAG00000044154	0	0	0	0	0	0	0	0	0	0	0	0	0	0	0	0	0	0	0	0	0	0	0	0	0	0	0	0	0	0	0	0	0	0	0	0	0
ENSBTAG00000045424	0	0	0	0	0	0	0	0	1	0	0	0	0	0	0	0	0	0	0	0	0	0	0	0	0	0	0	0	0	0	0	0	0	0	0	0	0
ENSBTAG00000052530	0	0	0	0	0	0	0	0	0	0	0	0	0	0	0	0	0	0	0	0	0	0	0	0	0	0	0	0	0	0	0	0	0	0	0	0	0
ENSBTAG00000051544	0	0	0	0	0	0	0	0	0	0	0	0	0	0	0	0	0	0	0	0	0	0	0	0	0	0	0	0	0	0	0	0	0	0	0	0	0
ENSBTAG00000052321	0	0	0	0	0	0	0	0	0	0	0	0	0	0	0	0	0	0	0	0	0	0	0	0	0	0	0	0	0	0	0	0	0	0	0	0	0
ENSBTAG00000053953	0	0	0	0	0	0	0	0	0	0	0	0	0	0	0	0	0	0	0	0	0	0	0	0	0	0	0	0	0	0	0	0	0	0	0	0	0
ENSBTAG00000054015	0	0	0	0	0	0	0	0	1	0	0	0	0	0	0	0	0	0	0	0	0	0	0	0	0	0	0	0	2	0	0	0	0	0	0	0	0
ENSBTAG00000052457	0	0	0	0	0	0	0	0	0	0	0	0	0	0	0	0	0	0	0	0	0	0	0	0	0	0	0	0	0	0	0	0	0	0	0	0	0
ENSBTAG00000039602	0	0	0	0	0	0	0	0	0	0	0	0	0	0	0	0	0	0	0	0	0	0	0	0	0	0	0	0	0	0	0	0	0	0	0	0	0
ENSBTAG00000050522	0	0	0	0	0	0	0	0	0	0	0	0	0	0	0	0	0	0	0	0	0	0	0	0	0	0	0	0	0	0	0	0	0	0	0	0	0
ENSBTAG00000037933	0	0	0	0	0	0	0	0	0	0	0	0	0	0	0	0	0	0	0	0	0	0	0	0	0	0	0	0	0	0	0	0	0	0	0	0	0
ENSBTAG00000055221	0	0	0	0	0	0	0	0	0	0	0	0	0	0	0	0	0	0	0	0	0	0	0	0	0	0	0	0	0	0	0	0	0	0	0	0	0
ENSBTAG00000052202	0	0	0	0	0	0	0	0	0	0	0	0	0	0	0	0	0	0	0	0	0	0	0	0	0	0	0	0	0	0	0	0	0	0	0	0	0
ENSBTAG00000046384	0	0	0	0	0	0	0	0	0	0	0	0	0	0	0	0	0	0	0	0	0	0	0	0	0	0	0	0	0	0	0	0	0	0	0	0	0
ENSBTAG00000039820	0	0	0	0	0	0	0	0	4232	1848	2809	545	2166	0	4	0	0	0	0	0	0	0	0	4	10	0	0	10	0	0	0	0	1	4	2	0	2
ENSBTAG00000039255	0	0	0	0	0	0	0	0	2	1	0	2	2	0	0	0	0	0	0	0	0	0	0	0	0	0	0	0	57	5	30	32	21	0	0	0	0
ENSBTAG00000034854	0	0	4	2	0	0	0	0	6	0	6	0	0	0	1	1	0	0	0	0	0	0	0	0	0	0	0	0	0	0	0	0	0	0	0	0	0
ENSBTAG00000042595	0	0	0	0	0	0	0	0	0	0	0	0	0	0	0	0	0	0	0	0	0	0	0	0	0	0	0	0	0	0	0	0	0	0	0	0	0
ENSBTAG00000004139	687	535	552	264	359	253	20	201	963	487	410	74	334	44	218	62	37	145	381	54	266	37	337	870	1258	744	278	966	277	46	219	247	124	813	880	763	602
ENSBTAG00000007444	51	40	28	15	30	25	2	10	15	6	24	0	16	29	208	44	20	103	2	0	0	0	2	6	6	1	6	4	20	0	12	6	19	2	12	26	3
ENSBTAG00000014233	2227	1519	1537	2666	2214	2454	473	2182	4859	2777	2284	505	2334	227	1388	254	231	956	1838	174	1281	216	1261	2254	2424	2607	389	1513	2952	443	2646	2872	2132	2322	2446	2046	1747
ENSBTAG00000020122	1401	1430	1287	990	974	1014	186	936	3747	1857	1804	391	1757	76	480	175	104	508	1073	111	746	155	789	1372	1429	1701	323	981	1814	273	1515	2115	1465	1591	1588	1495	1434
ENSBTAG00000020121	180	134	140	118	102	128	22	108	604	396	321	80	289	36	153	36	32	151	166	19	112	29	120	189	222	227	45	149	181	31	187	264	132	171	229	196	184
ENSBTAG00000000201	591	384	465	148	204	168	20	110	1084	558	463	102	420	46	167	68	52	185	350	51	355	24	287	966	971	677	149	636	513	62	440	530	307	950	891	666	648
ENSBTAG00000038433	4	1	0	0	12	0	0	0	0	18	0	0	0	0	2	0	0	0	0	0	6	0	0	0	12	0	0	0	2	2	6	0	0	2	27	0	0
ENSBTAG00000001412	46	107	67	258	238	327	80	235	168	140	88	19	86	22	103	37	34	76	65	3	46	8	41	91	147	142	28	73	114	12	49	159	92	80	96	114	119
ENSBTAG00000045479	0	0	0	0	0	0	0	0	0	0	0	0	0	0	0	0	0	0	0	0	0	0	0	0	0	0	0	0	0	0	0	0	0	0	0	0	0
ENSBTAG00000052349	0	0	0	0	0	0	0	0	0	0	0	0	0	0	0	0	0	0	0	0	0	0	0	0	0	0	0	0	0	0	0	0	0	0	0	0	0
ENSBTAG00000052332	0	0	0	0	0	0	0	0	0	0	0	0	0	0	0	0	0	0	0	0	0	0	0	0	0	0	0	0	0	0	0	0	0	0	0	0	0
ENSBTAG00000000648	1798	2805	1897	201	279	173	18	94	188	143	64	15	81	22	102	9	17	79	606	88	487	41	447	241	159	84	69	250	425	20	72	181	69	403	555	265	296
ENSBTAG00000000706	4401	4023	6158	2682	3807	1368	210	954	2980	2131	1485	282	1045	425	2693	247	280	1189	1756	170	815	112	659	10818	11799	9830	2579	8668	2422	124	802	711	384	2162	2401	689	787
ENSBTAG00000045024	0	0	0	0	0	0	0	0	0	0	0	0	0	0	0	0	0	0	0	0	0	0	0	0	0	0	0	0	0	0	0	0	0	0	0	6	0
ENSBTAG00000050914	1919	1497	2442	1696	1966	1852	330	1480	1229	659	451	93	554	47	294	81	69	230	133	28	95	22	94	5286	4932	3656	1030	3601	423	62	297	491	226	336	579	395	362
ENSBTAG00000050144	0	0	0	0	0	0	0	0	0	0	0	0	0	0	0	0	0	0	0	0	0	0	0	0	0	0	0	0	0	0	0	0	0	0	0	0	0
ENSBTAG00000017753	32095	32026	32311	19541	29543	26999	3937	18376	72460	43636	37672	7089	30523	693	4106	842	669	2456	5928	649	3810	637	3553	69337	90819	69197	16877	58309	9177	932	5597	10423	5644	14882	18769	14694	15774
ENSBTAG00000042557	0	0	0	0	0	0	0	0	0	0	0	0	0	0	0	0	0	0	0	0	0	0	0	0	0	0	0	0	0	0	0	0	0	0	0	0	0
ENSBTAG00000019043	539	445	436	362	305	518	64	353	760	315	399	51	237	35	170	63	43	192	482	68	347	46	320	650	720	665	134	485	344	39	254	408	208	680	650	583	654
ENSBTAG00000000605	2571	2503	2080	33356	24232	43974	6798	33458	11906	6160	5816	1233	5053	963	5531	1794	1645	6229	3838	365	1935	572	2509	1716	1823	2490	404	1359	7220	818	4979	7857	5207	1984	1921	2120	2093
ENSBTAG00000000603	3750	2888	3693	2325	3271	3008	404	1792	316	292	169	18	195	63	423	90	67	320	1123	95	612	139	719	2522	2015	2851	475	1481	800	78	494	856	402	313	379	484	400
ENSBTAG00000019542	556	459	465	2408	2248	3716	511	2736	1619	1007	845	153	703	130	816	224	244	851	683	78	372	99	457	572	554	763	136	400	1111	162	871	1270	769	528	706	657	523
ENSBTAG00000036404	0	0	0	0	0	0	0	0	0	0	0	0	0	0	0	0	0	0	0	0	0	0	0	0	0	0	0	0	0	0	0	0	0	0	0	0	0
ENSBTAG00000042261	0	0	0	0	0	0	0	0	0	0	0	0	0	0	0	0	0	0	0	0	0	0	0	0	0	0	0	0	0	0	0	0	0	0	0	0	0
ENSBTAG00000043064	0	0	0	0	0	0	0	0	0	0	0	0	0	0	0	0	0	0	0	0	0	0	0	0	0	0	0	0	0	0	0	0	0	0	0	0	0
ENSBTAG00000038900	0	1	0	1	2	5	0	2	3	2	0	0	1	0	0	0	0	0	0	0	0	0	3	0	0	0	0	1	1	0	0	2	6	2	1	0	0
ENSBTAG00000045128	0	0	0	0	0	0	0	0	0	0	0	0	0	0	0	0	0	0	0	0	0	0	0	0	0	0	0	0	0	0	0	0	0	0	0	0	0
ENSBTAG00000003301	5	0	2	11	6	2	1	9	5	5	6	0	2	0	1	0	0	0	0	0	0	0	2	0	4	0	2	11	50	0	16	7	4	4	0	2	4
ENSBTAG00000036841	0	0	0	0	0	0	0	0	0	0	0	0	0	0	0	0	0	0	0	0	0	0	0	0	0	0	0	0	0	0	0	0	0	0	0	0	0
ENSBTAG00000053315	0	0	0	0	0	0	0	0	0	0	0	0	0	0	0	0	0	0	0	0	0	0	0	0	0	0	0	0	0	0	0	0	0	0	0	0	0
ENSBTAG00000047337	0	0	0	0	0	0	0	0	0	0	0	0	0	0	0	0	0	0	0	0	0	0	0	0	0	0	0	0	0	0	0	0	0	0	0	0	0
ENSBTAG00000044598	0	0	0	0	0	0	0	0	0	0	0	0	0	0	0	0	0	0	0	0	0	0	0	0	0	0	0	0	0	0	0	0	0	0	0	0	0
ENSBTAG00000043929	0	0	0	0	0	0	0	0	0	0	0	0	0	0	0	0	0	0	0	0	0	0	0	0	0	0	0	0	0	0	0	0	0	0	0	0	0
ENSBTAG00000000597	2	0	0	0	0	0	0	1	4	4	1	1	0	0	2	0	0	6	0	0	0	0	0	2	0	0	0	0	0	0	0	0	0	1	2	3	2
ENSBTAG00000000588	65	110	80	50	85	25	4	43	202	163	85	40	111	17	107	15	19	100	4	0	2	0	1	12	2	0	0	2	6	0	5	6	4	169	73	659	127
ENSBTAG00000001395	290	208	238	76	127	67	13	48	101	43	30	0	40	2	11	9	4	18	236	21	143	6	126	536	500	238	69	277	256	42	245	336	178	630	742	443	518
ENSBTAG00000055283	0	0	0	0	0	0	0	0	0	0	0	0	0	0	0	0	0	0	0	0	0	0	0	0	0	0	0	0	0	0	0	0	0	1	0	0	0
ENSBTAG00000018704	1112	862	603	2885	2399	3304	512	2488	468	206	259	42	182	21	101	12	23	56	232	0	96	23	90	596	567	568	93	312	704	119	589	950	530	629	550	579	533
ENSBTAG00000004869	415	137	131	444	682	544	80	294	3591	1771	1827	306	1389	4	44	31	4	30	556	87	615	62	438	411	338	153	51	219	731	98	672	691	394	454	538	636	712
ENSBTAG00000043726	0	0	0	0	0	0	0	0	0	0	0	0	0	0	0	0	0	0	0	0	0	0	0	0	0	0	0	0	0	0	0	0	0	0	0	0	0
ENSBTAG00000029827	4	1	0	0	0	0	0	0	0	0	0	0	0	0	0	0	0	0	0	0	0	0	0	0	0	2	0	0	0	0	0	0	0	2	0	0	0
ENSBTAG00000029912	0	0	0	0	0	0	0	0	0	0	0	0	0	0	0	0	0	0	0	0	0	0	0	0	0	0	0	0	0	0	0	0	0	0	0	0	0
ENSBTAG00000029768	0	0	0	0	0	0	0	0	0	0	0	0	0	0	0	0	0	0	0	0	0	0	0	0	0	0	0	0	0	0	0	0	0	0	0	0	0
ENSBTAG00000054337	14	10	24	7	6	10	0	4	4	0	3	0	3	0	1	3	0	6	1	0	0	0	4	3	10	4	0	3	4	0	0	3	0	4	3	1	2
ENSBTAG00000053883	27	13	14	14	2	14	2	15	37	20	17	2	13	3	3	0	0	1	4	0	7	2	16	5	16	6	4	9	14	0	2	0	0	18	16	9	9
ENSBTAG00000044220	0	0	0	0	0	0	0	0	0	0	0	0	0	0	0	0	0	0	0	0	0	0	0	0	0	0	0	0	0	0	0	0	0	0	0	0	0
ENSBTAG00000019314	855	704	853	1784	1574	1934	402	1929	526	305	198	35	214	516	3024	896	770	3012	483	28	245	49	317	1564	1269	1392	372	1308	529	48	264	416	395	1307	1168	931	932
ENSBTAG00000052575	179	100	153	20	55	24	0	15	228	110	122	31	121	4	53	26	15	35	53	5	63	9	34	178	248	57	44	122	126	12	129	114	69	120	104	97	87
ENSBTAG00000047293	730	592	774	166	172	91	28	55	1296	659	616	94	491	47	247	124	41	198	297	35	241	45	241	834	966	440	173	617	427	48	404	457	320	526	630	531	389
ENSBTAG00000054742	8	6	6	0	0	0	0	0	11	14	5	0	7	0	3	0	2	1	11	0	8	2	2	0	0	2	0	0	3	0	7	10	16	6	3	1	8
ENSBTAG00000002623	163	147	211	61	104	36	9	65	95	76	49	16	46	0	22	6	6	2	428	25	146	22	148	817	956	898	83	366	236	32	203	204	155	7659	4435	2210	2135
ENSBTAG00000012908	724	699	685	261	298	236	45	164	1520	844	781	176	759	18	131	29	21	103	781	52	478	80	545	892	909	552	142	528	412	55	326	452	274	1287	1367	1364	1496
ENSBTAG00000054574	63	17	18	1	13	0	0	2	83	38	54	2	55	2	3	0	0	0	18	0	6	0	8	237	168	128	33	116	16	0	2	14	0	220	152	93	88
ENSBTAG00000034347	30	14	26	7	4	18	2	11	130	59	74	24	54	2	0	0	0	0	24	2	18	0	32	52	40	39	4	31	59	15	51	73	27	70	49	61	48
ENSBTAG00000038512	0	2	2	0	0	0	0	1	1	0	5	0	0	0	0	0	0	0	1	0	0	0	0	0	0	2	0	1	0	0	0	0	0	0	0	0	0
ENSBTAG00000048954	0	0	0	1	0	0	0	0	0	0	2	0	0	0	0	0	0	0	0	0	0	0	0	0	0	0	0	0	0	0	0	0	0	0	2	0	0
ENSBTAG00000038422	18	25	16	2	13	10	2	2	258	208	193	41	170	0	12	1	1	2	184	16	107	22	107	21	46	110	14	37	25	1	9	24	14	56	52	170	67
ENSBTAG00000048578	0	0	0	0	0	0	0	0	0	0	0	0	0	0	0	0	0	0	0	0	0	0	0	0	0	0	0	0	0	0	0	0	0	0	0	0	0
ENSBTAG00000050084	0	0	0	0	0	0	0	0	0	0	0	0	0	0	0	0	0	0	0	0	0	0	0	0	0	0	0	0	0	0	0	0	0	0	0	0	0
ENSBTAG00000046755	0	1	3	3	0	2	1	0	28	16	11	1	21	0	0	0	0	0	5	4	6	0	6	56	82	29	21	33	17	1	5	16	8	5	2	4	1
ENSBTAG00000010462	19	13	30	39	73	40	6	44	469	279	309	111	276	0	9	0	0	2	190	14	93	16	299	808	935	354	172	569	215	18	162	225	139	48	90	47	85
ENSBTAG00000028813	0	0	0	0	0	0	0	0	0	0	0	0	0	0	0	0	0	0	0	0	0	0	0	0	0	0	0	0	0	0	0	0	0	0	0	0	0
ENSBTAG00000043751	0	0	0	0	0	0	0	0	0	0	0	0	0	0	0	0	0	0	0	0	0	0	0	0	0	0	0	0	0	0	0	0	0	0	0	0	0
ENSBTAG00000009851	1085	721	794	175	341	245	29	150	768	387	255	91	368	28	129	42	26	74	458	61	398	24	298	791	838	288	93	379	1804	208	1398	2151	949	918	1153	710	716
ENSBTAG00000051036	0	0	0	0	0	0	0	0	0	0	0	0	0	0	0	0	0	0	0	0	0	0	0	0	0	0	0	0	0	0	0	0	0	0	0	0	0
ENSBTAG00000008359	0	0	0	2	0	0	0	0	0	0	0	0	0	0	1	0	0	0	0	0	0	0	1	0	2	0	0	1	0	0	0	0	0	0	0	0	0
ENSBTAG00000036262	1520	863	1005	1223	1179	1512	311	1153	2088	1168	1366	240	1086	49	277	171	129	481	2280	226	1583	269	1974	860	1044	1007	201	700	357	66	402	427	322	602	790	814	745
ENSBTAG00000045043	0	0	0	0	0	0	0	0	0	0	0	0	0	0	0	0	0	0	0	0	0	0	0	0	0	0	0	0	0	0	0	0	0	0	0	0	0
ENSBTAG00000043669	0	0	0	0	0	0	0	0	0	0	0	0	0	0	0	0	0	0	0	0	0	0	0	0	0	0	0	0	0	0	0	0	0	0	0	0	0
ENSBTAG00000054327	0	0	2	23	0	10	0	8	2	4	0	0	0	0	0	4	0	0	0	0	0	0	0	0	4	0	0	0	0	0	0	0	0	0	2	0	4
ENSBTAG00000045974	6	0	12	8	21	20	3	10	6	4	0	0	0	0	0	0	0	0	12	2	8	1	3	12	29	55	6	21	5	0	12	11	2	132	105	60	82
ENSBTAG00000009219	0	2	0	45	70	58	20	62	0	0	1	0	0	0	21	0	0	3	0	0	0	0	0	0	0	0	2	0	3	0	0	2	0	2	3	2	4
ENSBTAG00000053095	0	0	0	0	0	0	0	0	0	0	0	0	0	0	0	0	0	0	0	0	0	0	0	0	0	0	0	0	0	0	0	0	0	0	0	0	0
ENSBTAG00000026156	288	292	305	74	77	76	0	40	116	26	14	4	26	4	18	4	0	24	4	2	1	0	10	613	519	148	131	353	92	6	42	84	36	24	51	35	24
ENSBTAG00000007939	673	843	731	845	783	1067	152	816	2847	1333	1451	292	1283	56	286	111	87	267	745	93	531	146	545	1296	1231	1634	242	773	2617	451	2663	4267	2398	884	887	994	966
ENSBTAG00000009128	0	2	4	0	0	0	0	2	98	16	79	0	6	0	9	1	0	4	0	0	0	0	0	0	0	0	2	0	0	0	0	0	2	0	0	0	0
ENSBTAG00000039151	0	0	0	0	0	0	0	0	46	26	16	1	19	0	0	0	0	0	0	0	0	0	0	0	0	0	0	0	2	0	0	0	0	5	6	2	16
ENSBTAG00000046393	0	0	0	0	0	0	0	0	0	0	1	0	0	0	0	0	0	0	0	0	0	0	0	0	0	0	0	0	0	0	0	0	0	0	0	0	0
ENSBTAG00000046959	1334	1156	1075	687	761	558	96	504	3280	1396	1531	270	1304	101	644	163	117	643	941	110	646	113	586	2053	1925	1723	413	1459	952	126	758	977	625	2684	2567	2138	2186
ENSBTAG00000023675	347	275	281	259	320	358	81	253	1019	460	494	59	342	28	195	51	67	209	302	28	182	51	187	460	587	281	135	433	342	72	351	341	211	735	639	548	543
ENSBTAG00000007970	372	394	355	407	404	465	59	328	812	406	366	80	384	28	173	37	54	214	362	33	218	60	255	543	579	701	114	380	417	61	363	454	262	680	661	641	630
ENSBTAG00000050305	0	0	0	0	0	0	0	0	0	0	0	0	0	0	0	0	0	0	0	0	0	0	0	0	0	0	0	0	0	0	0	0	0	0	0	0	0
ENSBTAG00000045590	4	0	0	0	0	0	0	0	0	0	0	0	0	0	0	0	0	0	0	0	0	0	0	0	0	0	0	0	0	0	0	0	0	0	0	2	0
ENSBTAG00000006811	171	218	180	30	42	12	0	16	232	112	46	10	29	0	20	8	7	8	95	12	95	9	72	117	80	22	9	35	52	2	7	10	8	12	37	0	17
ENSBTAG00000023652	3929	6548	7204	552	710	504	105	473	1066	507	271	79	426	6	101	32	21	82	20454	2121	13085	2356	15961	1543	1663	1091	340	1229	967	93	336	556	290	801	892	648	869
ENSBTAG00000005155	294	455	480	139	172	157	17	112	462	268	286	42	219	5	58	23	6	38	269	25	163	31	148	493	466	414	104	407	221	19	94	161	105	353	279	305	273
ENSBTAG00000005162	0	2	1	0	0	2	2	1	4	4	7	2	2	0	6	0	0	1	0	0	0	0	0	70	94	149	36	58	163	13	170	130	95	0	2	0	0
ENSBTAG00000015728	255	267	367	332	354	368	73	298	1051	479	525	136	541	25	157	37	38	131	231	25	137	36	209	431	437	611	71	360	465	72	317	467	263	458	346	336	313
ENSBTAG00000045781	0	0	0	0	0	0	0	0	0	0	0	0	0	0	0	0	0	0	0	0	0	0	0	0	0	0	0	0	0	0	0	0	0	0	0	0	0
ENSBTAG00000034182	80	42	34	19	27	22	7	27	23	42	19	2	8	0	9	2	4	12	12	2	6	0	17	53	90	54	12	37	34	5	66	65	31	10	41	59	31
ENSBTAG00000050258	4	0	0	0	0	1	0	0	10	7	14	0	8	0	0	0	0	0	0	0	0	2	2	48	47	28	8	27	2	2	4	1	2	0	0	0	0
ENSBTAG00000044111	0	0	6	0	0	0	0	0	36	61	8	8	26	0	0	1	0	0	0	11	41	0	3	34	10	23	1	11	1	0	0	2	2	0	1	0	0
ENSBTAG00000042804	0	0	0	0	0	0	0	0	0	0	0	0	0	0	0	0	0	0	0	0	0	0	0	0	0	0	0	0	0	0	0	0	0	0	0	0	0
ENSBTAG00000048531	0	0	0	0	0	0	0	0	0	0	0	0	0	0	0	0	0	0	0	0	0	0	0	0	0	0	0	0	0	0	0	0	0	0	0	0	0
ENSBTAG00000010091	96	129	104	249	298	361	62	295	1389	618	758	172	820	10	122	41	14	57	167	22	118	28	161	241	269	298	42	180	225	26	218	371	248	98	128	130	133
ENSBTAG00000047147	1367	760	1128	1104	1474	1059	195	803	452	311	192	51	167	37	130	35	31	102	273	12	133	17	121	1639	1398	705	311	1040	483	81	474	512	279	246	294	182	175
ENSBTAG00000015546	431	444	406	276	236	238	40	188	1186	693	574	151	542	69	428	83	101	457	479	82	360	78	412	333	404	474	77	323	405	87	365	462	379	385	422	388	310
ENSBTAG00000001416	0	0	0	0	0	0	0	0	0	0	0	0	0	0	0	0	0	0	0	0	0	0	0	0	0	0	0	0	200	9	75	149	126	0	0	0	0
ENSBTAG00000048630	0	0	0	0	0	0	0	0	0	0	0	0	0	0	0	0	0	0	0	0	0	0	0	0	0	0	0	0	0	0	0	0	0	0	0	0	0
ENSBTAG00000052028	0	0	0	0	0	0	0	0	0	0	0	0	0	0	0	0	0	0	0	0	0	0	0	0	0	0	0	0	0	0	0	0	0	0	0	0	0
ENSBTAG00000054232	0	0	0	0	0	0	0	0	0	0	0	0	0	0	0	0	0	0	0	0	0	0	0	0	0	0	0	0	0	0	0	0	0	0	0	0	0
ENSBTAG00000050430	0	0	0	0	0	0	0	0	0	0	0	0	0	0	0	0	0	0	0	0	0	0	0	0	0	0	0	0	0	0	0	0	0	0	0	0	0
ENSBTAG00000052415	0	0	0	0	0	0	0	0	0	0	0	0	0	0	0	0	0	0	0	0	0	0	0	0	0	0	0	0	0	0	0	0	0	0	0	0	0
ENSBTAG00000054488	0	0	0	0	0	0	0	0	0	0	0	0	0	0	0	0	0	0	0	0	0	0	0	0	0	0	0	0	0	0	0	0	0	0	0	0	0
ENSBTAG00000022908	0	0	0	0	0	0	0	0	0	0	0	0	0	0	0	0	0	0	0	0	0	0	0	0	0	0	0	0	0	0	0	0	0	0	0	0	0
ENSBTAG00000051584	0	0	0	0	0	0	0	0	0	0	0	0	0	0	0	0	2	4	0	0	0	0	0	0	0	0	0	0	0	0	0	0	0	0	0	0	0
ENSBTAG00000051784	0	0	0	0	0	0	0	0	0	0	0	0	0	0	0	0	0	2	0	0	0	0	0	0	0	0	0	0	0	0	0	0	0	0	0	0	0
ENSBTAG00000051905	0	0	0	0	0	0	0	0	0	0	0	0	0	0	0	0	0	0	0	0	0	0	0	2	0	0	0	0	0	0	0	0	0	0	0	0	0
ENSBTAG00000033437	0	0	0	0	0	0	0	0	0	0	0	0	0	0	0	0	0	0	0	0	0	0	0	0	0	0	0	0	0	0	0	0	0	0	0	0	0
ENSBTAG00000051566	0	0	0	0	0	0	0	0	0	0	0	0	0	0	0	0	0	0	0	0	0	0	0	0	1	0	0	0	0	0	0	0	0	0	0	0	0
ENSBTAG00000050543	0	0	0	0	0	0	0	0	0	0	0	0	0	0	0	0	0	0	0	0	0	0	0	2	0	0	0	0	0	0	0	0	0	0	0	0	0
ENSBTAG00000052122	0	0	0	0	0	0	0	0	0	0	0	0	0	0	0	0	0	0	0	0	0	0	0	0	0	0	0	0	0	0	0	0	0	0	0	0	0
ENSBTAG00000044603	0	0	0	0	0	0	0	0	0	0	0	0	0	0	0	0	0	0	0	0	0	0	0	0	0	0	0	0	0	0	0	0	0	0	0	0	0
ENSBTAG00000049354	0	0	0	0	0	0	0	0	0	0	0	0	0	0	0	0	0	0	0	0	0	0	0	0	0	0	0	0	0	0	0	0	0	0	0	0	0
ENSBTAG00000053167	0	0	0	0	0	0	0	0	0	0	0	0	0	0	0	0	0	0	0	0	0	0	0	0	0	0	0	0	0	0	0	0	0	0	0	0	0
ENSBTAG00000027782	0	0	0	0	0	0	0	0	0	0	0	0	0	0	0	0	0	0	0	0	0	0	0	0	0	0	0	0	0	0	0	0	0	0	0	0	0
ENSBTAG00000020996	1370	1583	1474	1421	1462	1364	223	1037	2001	860	972	193	923	79	623	154	118	429	861	84	551	80	593	2145	2212	1909	378	1247	1598	217	1382	1726	1463	2050	1562	1750	1683
ENSBTAG00000020997	0	0	0	0	0	0	0	0	0	0	0	0	2	0	0	0	0	0	2	0	5	2	3	7	16	8	6	14	164	25	131	119	92	38	32	38	26
ENSBTAG00000028582	0	0	0	0	0	0	0	0	0	0	0	0	0	0	0	0	0	0	0	0	0	0	0	0	0	0	0	0	0	0	0	0	0	0	0	0	0
ENSBTAG00000004124	996	552	531	276	357	244	45	224	1570	973	753	255	1055	46	211	85	59	275	2685	371	2189	286	2205	856	1027	728	205	635	1260	125	936	1167	741	518	619	458	374
ENSBTAG00000044934	0	0	0	0	0	0	0	0	0	0	0	0	0	0	0	0	0	0	0	0	0	0	2	0	0	0	0	0	0	0	0	0	0	0	0	0	0
ENSBTAG00000023666	0	0	0	0	0	0	0	2	0	0	0	0	0	0	0	0	0	0	115	21	75	15	136	0	0	0	0	0	0	0	2	16	6	4	26	0	0
ENSBTAG00000004471	841	755	593	270	367	321	73	276	4310	2024	2407	605	2836	107	668	186	103	491	2011	171	1027	236	1480	1415	1108	1623	237	908	282	62	291	337	237	1881	1635	1666	1626
ENSBTAG00000014889	1224	737	1068	219	326	225	46	168	3093	1883	2062	429	1756	29	225	68	35	137	711	139	653	63	587	1748	1560	878	333	1208	256	27	265	224	126	277	376	277	245
ENSBTAG00000013662	4371	2297	7641	891	1859	947	115	563	395	244	148	49	182	49	259	63	55	125	453	58	353	23	922	7331	4621	3744	1484	5359	725	50	290	352	226	179	212	251	172
ENSBTAG00000013663	137	117	141	199	154	173	29	180	355	252	213	31	159	26	161	26	20	131	100	9	58	20	52	87	114	127	18	57	199	26	132	259	207	131	119	90	113
ENSBTAG00000013664	2062	1796	1633	862	1248	609	68	397	938	536	264	66	255	260	1588	369	320	1113	577	37	177	63	178	3596	2393	1443	474	1822	531	43	235	467	235	2757	3354	1445	1136
ENSBTAG00000013667	4	4	4	1	1	0	0	0	2	3	5	0	2	0	0	0	0	0	2	0	0	0	0	1	7	3	2	1	0	0	1	0	0	4	6	6	0
ENSBTAG00000015010	887	786	882	517	503	527	90	432	2123	1023	1097	201	834	95	473	158	83	430	533	109	504	103	499	1201	1243	999	244	731	947	137	771	996	674	1086	1131	1023	937
ENSBTAG00000004833	660	710	477	772	633	1002	141	621	3831	1931	2103	521	1977	45	284	80	77	286	1637	157	907	250	1173	577	681	698	183	541	568	67	446	675	553	614	571	700	626
ENSBTAG00000014302	2279	2630	2065	2129	2085	2666	422	1799	5245	3084	3279	636	2821	406	2089	524	473	1904	1955	198	1433	294	1651	2023	2173	2570	486	1547	2358	257	1907	2661	1764	2403	2498	2772	2520
ENSBTAG00000034442	206	124	165	840	524	1384	174	786	885	478	592	121	601	4	29	8	6	28	286	29	177	72	346	85	73	102	33	97	86	2	41	54	69	292	271	553	472
ENSBTAG00000045333	0	0	0	0	0	0	0	0	0	0	0	0	0	0	0	0	0	0	0	0	0	0	0	0	0	0	0	0	0	0	0	0	0	0	0	0	0
ENSBTAG00000013321	0	0	0	0	0	0	0	0	2	0	0	0	0	0	0	0	0	0	0	0	0	0	0	0	0	0	0	0	0	0	0	0	0	0	0	2	0
ENSBTAG00000004459	491	548	618	107	172	106	9	62	1336	790	517	118	663	5	46	8	4	12	57	6	51	10	43	139	140	74	14	69	257	14	95	152	76	22	50	8	17
ENSBTAG00000012140	0	0	4	0	0	0	0	0	4	2	8	0	0	0	0	0	0	0	2	0	4	0	4	2	9	2	4	6	0	0	0	0	0	0	1	0	4
ENSBTAG00000016363	2173	1992	1883	1283	1247	1406	237	1129	3656	1989	1974	405	1766	177	1072	254	257	888	1999	189	890	285	1389	2808	2803	2661	555	1918	2621	444	2516	3242	2293	1851	2203	1885	1961
ENSBTAG00000026836	1305	1383	1638	49	113	70	13	46	51	21	11	8	14	2	57	26	18	55	8	0	4	0	4	334	346	71	55	258	470	29	218	286	139	25	25	13	18
ENSBTAG00000053387	0	0	1	11	5	22	1	14	3	1	4	1	2	0	2	1	1	8	1	0	0	0	2	0	0	2	0	0	0	1	3	4	3	1	0	0	0
ENSBTAG00000015662	57	38	37	6	19	4	5	19	50	34	25	11	33	0	9	4	2	9	26	3	9	2	11	61	94	34	6	66	32	4	26	46	20	140	126	83	83
ENSBTAG00000016932	555	546	460	153	237	172	37	175	838	460	460	104	495	23	172	44	46	129	287	33	137	26	140	584	677	743	144	451	278	40	222	335	211	1071	889	1075	797
ENSBTAG00000018731	26	26	30	17	8	18	0	13	139	57	68	11	55	6	14	7	7	25	78	8	50	5	41	31	39	25	11	41	15	5	31	14	17	71	57	56	81
ENSBTAG00000024027	477	564	556	803	691	984	150	707	1454	660	717	147	756	47	250	85	82	314	731	60	359	68	438	298	395	534	105	258	664	55	426	759	438	642	533	618	573
ENSBTAG00000015069	3441	3783	2972	2983	3039	3673	535	2559	5774	2499	3380	662	2809	366	2217	709	490	2083	2272	271	1637	369	1717	4048	3744	4731	690	2494	3504	457	2680	4486	2820	3754	3651	4340	3891
ENSBTAG00000013460	726	620	679	282	377	278	53	215	1365	878	713	145	563	60	340	93	61	221	397	66	350	48	284	1216	1470	1161	321	1039	862	117	841	813	579	1858	1631	1243	1354
ENSBTAG00000013461	19655	30400	19321	29723	28243	41395	5361	25855	19604	11136	13160	2551	11071	2310	14153	3549	3647	14224	13240	1393	8456	2012	9914	12745	13884	24218	2674	9495	57956	6661	38635	79286	48994	17974	18933	20282	17745
ENSBTAG00000013464	188	131	131	150	163	172	34	132	487	243	235	57	203	62	304	69	75	350	122	15	83	8	76	244	384	168	70	235	195	16	156	200	88	281	263	202	193
ENSBTAG00000013465	473	658	696	591	630	898	144	683	399	197	176	40	179	18	100	27	12	58	123	10	83	18	71	700	1132	915	184	596	687	56	357	551	447	822	753	521	588
ENSBTAG00000048517	7	3	0	0	2	0	0	0	0	0	0	0	2	0	1	0	1	1	0	0	0	0	0	9	7	0	0	3	3	2	6	1	3	7	2	6	4
ENSBTAG00000010987	360	479	455	233	359	225	34	183	367	308	139	49	272	16	46	27	13	64	480	71	423	81	589	437	487	1434	216	648	1675	507	2931	3544	3101	1918	3202	1549	1743
ENSBTAG00000045162	0	0	0	0	0	0	0	0	0	0	0	0	0	0	0	0	0	0	0	0	0	0	0	0	0	0	0	0	0	0	0	0	0	0	0	0	0
ENSBTAG00000054676	0	0	0	0	0	0	0	0	0	0	0	0	0	0	0	0	0	0	0	0	0	0	0	0	1	0	0	0	0	0	0	2	0	0	1	0	0
ENSBTAG00000044510	0	0	0	0	0	0	0	0	0	0	0	0	0	0	0	0	0	0	0	0	0	0	0	0	0	0	0	0	0	0	0	0	0	0	0	0	0
ENSBTAG00000051892	0	0	0	0	0	0	0	0	0	0	0	0	0	0	0	0	0	0	0	0	0	0	0	0	0	0	0	0	0	0	0	0	0	0	0	0	0
ENSBTAG00000003666	0	0	0	0	0	0	0	0	0	0	0	4	0	0	0	0	0	0	0	0	0	0	0	0	2	0	0	0	0	0	0	0	0	1	2	0	0
ENSBTAG00000044968	0	0	0	0	0	0	0	0	0	0	0	0	0	0	0	0	0	0	0	0	0	0	0	0	0	0	0	0	0	0	0	0	0	0	0	0	0
ENSBTAG00000000088	397	327	303	637	1022	925	149	764	1876	892	808	252	909	32	204	65	63	141	1081	158	1032	102	1071	2276	2626	1845	666	2330	189	63	281	582	369	755	851	527	622
ENSBTAG00000013057	573	573	554	67	108	67	11	51	229	196	183	30	138	11	45	14	10	52	142	23	123	11	87	578	680	322	160	521	111	5	96	107	55	609	826	550	568
ENSBTAG00000045335	0	0	0	0	0	0	0	0	0	2	0	0	0	0	0	0	0	0	0	0	0	0	0	0	0	0	0	0	0	0	0	0	0	0	1	0	0
ENSBTAG00000046313	2	0	0	0	0	0	0	0	0	0	0	0	0	0	0	0	0	0	0	0	0	0	0	0	0	0	0	0	0	0	0	0	0	0	0	0	0
ENSBTAG00000039575	0	0	0	0	0	0	0	0	0	0	0	0	0	0	0	0	0	0	0	0	0	0	0	0	0	0	0	0	0	0	0	0	0	0	0	2	0
ENSBTAG00000006893	1213	1326	1448	298	532	419	55	297	4548	2538	2480	510	2151	50	328	58	59	203	843	83	589	115	402	1735	2061	1213	348	1376	875	62	536	753	468	1836	2111	1705	1579
ENSBTAG00000003585	6427	5133	5524	2192	3021	2108	330	1673	5942	2963	2729	612	2716	86	595	217	132	518	4630	555	3493	596	3600	12656	12673	11646	2556	9227	5067	711	4537	4633	3713	8475	8883	7581	7906
ENSBTAG00000049729	5	1	3	0	0	0	0	0	1	2	0	0	2	0	0	2	0	0	2	0	0	0	0	4	6	0	0	4	0	0	0	4	9	16	7	8	4
ENSBTAG00000005787	648	754	636	561	666	863	126	450	1861	1213	1028	228	973	20	128	26	21	111	357	47	231	49	227	1148	1178	1164	277	921	1577	100	837	1009	936	549	549	529	433
ENSBTAG00000018397	6	1	0	3	4	3	0	2	4	7	6	0	2	0	0	0	0	2	14	0	4	0	4	40	34	31	2	13	93	5	52	31	36	52	21	10	53
ENSBTAG00000018399	9	2	12	13	4	13	2	2	14	4	5	0	4	0	2	2	2	8	6	0	0	0	0	24	16	5	2	13	10	0	0	5	4	13	4	6	8
ENSBTAG00000055188	0	0	0	0	0	0	0	0	0	0	0	0	0	0	0	0	0	0	0	0	0	0	0	0	0	2	1	0	0	0	0	0	0	0	0	0	0
ENSBTAG00000017140	92	109	90	48	31	34	6	25	109	55	39	5	32	4	24	8	8	29	61	6	28	2	14	164	149	74	31	94	102	16	90	74	28	336	283	227	225
ENSBTAG00000006158	88	56	30	117	107	90	13	66	204	117	108	28	97	7	32	9	5	25	41	3	44	3	16	92	79	86	14	32	88	6	30	66	39	217	165	133	92
ENSBTAG00000054027	0	0	0	0	0	0	0	0	0	0	0	0	0	0	0	0	0	0	0	0	0	0	0	0	0	0	0	0	0	0	0	0	0	0	0	0	0
ENSBTAG00000049130	682	745	629	1140	877	1266	236	1109	1756	894	803	147	658	52	335	84	81	381	528	67	393	80	406	451	453	624	105	370	1025	115	812	1147	748	389	370	412	341
ENSBTAG00000049108	15	11	21	1067	918	1085	210	1120	26	45	26	4	31	5	4	2	0	1	224	12	86	8	106	226	317	255	46	167	27	2	21	24	20	6488	2428	4857	2898
ENSBTAG00000050173	0	2	0	0	0	0	0	0	0	0	0	0	1	0	0	0	0	0	59	4	43	22	69	0	0	0	0	0	0	0	0	0	0	2	0	0	1
ENSBTAG00000044520	0	0	0	0	0	0	0	0	0	0	0	0	0	0	0	0	0	0	0	0	0	0	0	0	0	0	0	0	0	0	0	0	0	0	0	0	0
ENSBTAG00000020460	0	0	0	0	0	0	0	0	0	0	0	0	0	0	0	0	0	0	0	0	0	0	0	0	0	0	0	0	0	0	0	0	0	0	0	0	0
ENSBTAG00000038103	0	6	6	0	2	0	0	2	0	13	0	0	0	0	0	4	0	0	0	0	0	0	0	0	0	1	0	2	0	0	0	0	0	0	0	0	0
ENSBTAG00000022275	713	911	633	599	720	895	127	505	690	531	446	83	392	53	409	90	93	373	473	46	413	70	487	520	571	776	105	478	1077	189	910	1381	1110	575	738	676	724
ENSBTAG00000051495	0	0	0	0	0	0	0	0	2	2	0	0	0	0	0	0	0	0	0	0	0	0	0	0	0	0	0	0	0	0	0	0	0	0	1	0	0
ENSBTAG00000055085	98	93	64	97	69	115	22	122	141	99	77	8	50	23	139	20	36	92	53	5	46	8	43	111	74	83	19	39	48	6	69	104	64	80	88	103	78
ENSBTAG00000042390	0	0	0	0	0	0	0	0	0	0	0	0	0	0	0	0	0	0	0	0	0	0	0	0	0	0	0	0	0	0	0	0	0	0	0	0	0
ENSBTAG00000033360	18	8	5	22	10	25	2	9	33	28	4	6	22	0	6	0	4	8	22	6	15	10	9	6	21	12	7	23	26	13	22	26	39	19	20	19	12
ENSBTAG00000054558	40	25	20	1	12	4	1	3	60	47	27	6	31	0	2	0	2	4	51	2	29	0	34	110	92	51	7	21	10	0	8	2	3	15	2	2	10
ENSBTAG00000013769	256	317	311	60	96	19	7	35	629	372	334	45	298	0	54	10	10	37	660	105	461	74	512	929	895	796	201	669	86	2	33	60	47	132	147	115	61
ENSBTAG00000014441	8	10	24	36	31	39	9	41	38	42	14	12	48	0	2	5	0	4	157	9	76	11	100	177	315	271	59	198	34	8	53	28	24	446	463	520	623
ENSBTAG00000046637	0	0	2	0	0	0	0	0	0	0	0	0	0	0	0	0	0	0	0	0	0	0	0	0	0	0	0	0	167	16	45	227	114	0	2	0	0
ENSBTAG00000012646	53	35	65	20	24	43	4	6	39	36	13	7	23	0	0	0	2	2	18	0	7	0	19	62	82	50	13	81	44	7	24	25	34	49	74	47	63
ENSBTAG00000001209	2125	1972	2343	1321	1564	1274	224	1162	5850	3651	3572	753	3336	24	163	63	55	192	1977	244	1524	247	1679	3239	3982	2173	766	2797	653	67	288	531	386	757	963	671	745
ENSBTAG00000004601	574	595	490	924	789	1350	246	1122	1160	648	658	146	600	61	360	125	98	463	983	103	661	110	672	362	356	704	92	273	539	64	394	663	393	445	415	540	375
ENSBTAG00000004599	9	4	12	62	66	84	13	31	7	2	0	0	0	19	107	24	21	86	17	2	7	2	4	28	39	37	0	12	5	0	2	9	2	4	0	0	0
ENSBTAG00000015065	0	0	0	0	0	0	0	0	0	0	0	0	0	0	0	0	0	0	71	8	17	8	52	0	0	0	0	0	0	0	0	0	0	0	0	0	0
ENSBTAG00000016554	0	0	2	0	0	0	0	0	18	16	12	0	4	0	0	0	0	0	2	2	2	0	2	51	55	29	2	25	12	2	13	8	7	59	20	42	40
ENSBTAG00000048550	11	6	4	6	12	2	0	5	12	14	8	0	5	0	1	0	0	0	28	6	6	2	18	32	54	44	4	39	6	0	8	9	0	309	248	222	264
ENSBTAG00000019332	0	0	3	2	0	0	0	0	6	10	8	4	14	0	2	0	0	2	8	0	5	0	0	10	21	8	2	10	5	0	10	6	4	21	9	21	14
ENSBTAG00000033319	345	209	238	151	136	82	13	67	224	95	92	28	138	8	30	6	0	16	54	2	18	1	32	498	401	285	91	309	12	0	1	10	9	142	161	126	100
ENSBTAG00000011871	0	2	2	0	0	0	0	0	6	2	0	0	4	0	0	0	0	0	10	0	10	0	4	22	24	14	13	28	4	0	0	6	0	240	186	220	353
ENSBTAG00000009084	1804	1563	1380	1245	1198	1324	223	881	2518	1603	1252	257	1243	80	677	178	127	562	2047	201	1181	260	1456	1706	2041	2197	375	1171	1719	258	1416	1704	1440	2181	2733	2158	2229
ENSBTAG00000009085	1238	1168	1122	400	460	432	79	343	3019	1505	1233	270	1327	29	173	74	50	158	1217	121	792	166	998	1593	1453	1690	275	951	822	89	489	698	472	1749	1418	1600	1308
ENSBTAG00000010793	51836	56369	90579	2460	3172	1938	262	1218	2501	1627	602	163	689	605	3830	1308	1242	4673	619	59	386	32	381	12974	13564	6933	2983	10157	26286	1183	7326	8430	4490	1430	4595	1204	1716
ENSBTAG00000040144	24	129	26	0	5	11	1	2	1	2	0	0	1	2	11	2	0	0	4	0	4	1	4	20	28	57	16	28	25	10	57	47	6	261	95	283	100
ENSBTAG00000001235	241	277	188	54	66	52	11	32	54	44	15	13	27	0	20	9	4	9	57	2	29	8	44	160	139	362	56	161	75	2	44	50	44	849	380	731	751
ENSBTAG00000006534	101	90	81	251	228	263	38	223	396	204	235	33	144	10	66	11	18	45	107	16	60	10	65	124	139	91	35	121	149	6	139	188	107	109	138	130	105
ENSBTAG00000005723	143	185	151	82	91	116	16	66	472	241	270	54	247	12	71	14	13	51	142	23	87	26	127	220	215	223	28	152	229	23	187	267	124	300	252	311	268
ENSBTAG00000000242	79	123	139	76	112	162	22	108	89	48	39	11	37	11	59	15	19	62	58	12	45	10	52	46	66	65	17	52	78	16	90	117	85	62	73	78	80
ENSBTAG00000013909	766	1276	1263	171	271	231	21	68	302	193	119	35	110	35	211	48	49	158	44	2	33	4	46	472	344	262	94	278	728	65	404	376	231	298	663	174	176
ENSBTAG00000050116	4	8	7	0	2	4	0	0	21	9	3	2	12	0	2	0	0	0	4	0	2	2	0	60	58	26	13	38	1	0	0	2	0	11	15	5	9
ENSBTAG00000013920	2	2	9	2	0	1	0	0	13	0	2	1	3	0	0	0	0	2	2	0	6	2	1	57	72	40	11	46	5	0	0	0	0	16	10	2	14
ENSBTAG00000049524	0	0	6	4	2	0	0	0	11	10	0	2	0	0	0	0	0	0	2	0	2	0	0	55	48	37	8	47	23	2	9	13	7	5	0	0	6
ENSBTAG00000013937	213	295	358	145	181	246	22	144	825	413	440	93	384	12	88	26	20	60	204	35	140	24	119	514	714	753	131	521	217	40	212	250	139	534	498	492	410
ENSBTAG00000013292	2	6	8	4	12	8	0	6	4	3	1	0	6	0	6	0	0	1	16	0	13	0	10	80	62	18	33	68	31	6	57	75	23	311	415	159	171
ENSBTAG00000052710	0	0	0	0	0	0	0	0	0	0	0	0	0	0	0	0	0	0	0	0	0	0	0	0	0	0	0	0	0	0	0	0	0	2	0	0	0
ENSBTAG00000021000	318	174	205	150	179	94	16	64	698	416	462	89	312	61	392	134	74	326	250	36	276	32	237	495	623	186	121	465	497	78	335	465	301	413	638	262	306
ENSBTAG00000007784	3072	2663	2223	2186	2332	3075	459	2108	5854	2719	3328	595	2643	707	4714	1361	935	3953	1900	217	1302	235	1575	2951	2797	2720	648	2163	8326	1015	6462	9264	6494	2266	2757	2586	2349
ENSBTAG00000002703	2175	1275	1207	489	535	479	72	362	6898	3631	3709	628	2803	23	268	43	24	173	1596	205	1283	277	1208	2621	2847	2351	476	1740	5554	703	4092	7638	4960	2020	2356	1798	1715
ENSBTAG00000004971	284	297	280	228	181	144	26	155	2758	822	1021	261	1311	2	56	25	14	34	487	42	364	71	305	1244	1236	1502	279	1154	481	54	371	467	390	493	515	453	495
ENSBTAG00000044668	0	0	0	0	0	0	0	0	0	0	0	0	0	0	0	0	0	0	0	0	0	0	0	0	0	0	0	0	0	0	0	0	0	0	0	0	0
ENSBTAG00000004974	41	46	39	70	83	39	9	44	227	139	131	8	108	11	37	14	12	34	30	3	19	2	34	211	280	106	52	155	140	27	107	105	127	99	183	108	88
ENSBTAG00000004975	67	59	85	39	25	35	4	23	177	143	100	17	105	0	10	7	1	13	22	6	29	6	33	151	178	132	48	181	116	8	54	65	52	46	99	99	89
ENSBTAG00000004977	200	235	170	86	85	71	11	56	302	188	147	43	124	10	50	6	12	43	114	12	91	8	117	251	385	371	64	215	176	28	160	171	100	348	432	441	301
ENSBTAG00000002132	0	0	0	0	0	4	0	0	0	0	0	0	0	0	0	0	0	0	0	0	0	0	0	0	0	0	0	2	0	0	0	0	0	0	0	0	0
ENSBTAG00000050260	0	0	0	0	0	0	0	0	0	0	0	0	0	0	0	0	0	0	0	0	0	0	0	0	0	0	0	0	0	0	0	0	0	0	0	0	0
ENSBTAG00000011921	14	7	10	2	3	3	0	2	19	4	4	2	4	0	0	0	0	0	56	6	15	7	27	35	81	84	10	69	106	15	85	36	43	584	605	579	692
ENSBTAG00000011928	294	442	609	73	72	88	14	33	766	413	371	68	263	14	129	28	34	114	230	31	163	23	170	240	291	138	47	252	132	3	42	74	41	182	251	145	124
ENSBTAG00000047946	6	9	2	3	7	7	0	5	9	2	2	1	1	0	3	1	0	1	4	0	1	0	2	2	4	3	0	1	6	2	7	17	9	7	4	12	4
ENSBTAG00000006451	0	0	13	2	0	0	0	2	7	0	2	0	3	0	0	2	0	3	0	0	0	0	0	48	63	72	9	29	3	0	2	3	0	26	23	8	24
ENSBTAG00000049208	0	0	0	0	0	0	0	0	0	0	0	0	0	0	0	0	0	0	0	0	0	0	0	0	0	0	0	0	0	0	0	0	0	0	0	0	0
ENSBTAG00000049383	29	10	44	52	25	15	14	75	38	37	42	2	7	1	0	2	0	4	2	0	1	0	4	34	25	6	0	5	16	0	13	19	53	2	9	8	13
ENSBTAG00000044343	0	0	0	0	0	0	0	0	0	0	0	0	0	0	0	0	0	0	0	0	0	0	0	0	0	0	0	0	0	0	0	0	0	0	0	0	0
ENSBTAG00000045517	23	20	21	22	14	13	2	10	30	17	15	2	19	0	15	0	4	11	26	3	23	8	10	36	23	49	7	23	88	11	43	73	57	37	32	39	16
ENSBTAG00000048452	0	0	1	0	1	2	0	0	6	8	15	0	2	0	2	1	3	0	0	0	0	0	0	10	4	0	4	0	2	0	4	2	0	2	0	0	0
ENSBTAG00000048985	0	0	0	0	0	0	0	0	0	0	0	0	0	0	0	0	0	0	0	0	0	0	0	0	0	0	0	2	2	0	0	0	0	0	0	0	0
ENSBTAG00000048715	0	0	0	0	0	0	0	0	0	0	0	0	0	0	0	0	0	0	0	0	0	0	0	0	0	0	0	0	0	0	0	0	0	0	0	0	0
ENSBTAG00000055075	0	0	0	0	0	0	0	0	0	0	0	0	0	0	0	0	0	0	0	0	0	0	0	0	0	0	0	0	0	0	0	0	0	0	0	0	0
ENSBTAG00000049072	0	0	0	0	0	0	0	0	0	0	0	0	0	0	0	0	0	0	0	0	0	0	0	0	0	0	0	0	0	0	0	0	0	0	0	0	0
ENSBTAG00000045704	7	21	16	7	6	4	2	2	2910	2034	1461	364	1388	0	6	0	2	2	447	77	416	45	516	923	666	732	191	681	6	2	2	12	6	8	31	73	56
ENSBTAG00000054494	0	0	0	0	0	0	0	0	26	29	10	8	26	0	0	0	0	0	6	0	2	0	2	1	6	6	1	6	0	0	0	0	0	0	0	0	0
ENSBTAG00000014157	0	0	0	0	0	0	0	0	0	1	0	0	0	0	0	0	0	0	0	0	0	0	0	0	0	0	0	0	0	0	0	0	0	0	0	0	0
ENSBTAG00000009014	0	4	4	24	3	4	0	6	30	8	8	0	6	0	2	0	0	1	15	0	2	0	8	25	15	12	6	7	263	2	26	99	60	6	60	4	0
ENSBTAG00000001390	417	616	672	215	298	198	34	185	425	211	142	40	138	18	80	14	15	74	221	18	95	20	112	488	573	535	64	370	977	90	586	804	578	473	617	521	625
ENSBTAG00000000210	3283	2016	2443	1085	1804	879	138	762	1084	630	398	98	452	49	348	97	63	192	576	43	332	47	290	5239	5644	3262	1447	4891	927	135	696	993	567	887	1374	1034	1149
ENSBTAG00000000213	495	674	683	231	236	199	33	135	586	319	242	68	259	28	185	41	39	133	459	42	247	31	319	557	579	518	130	491	418	50	326	355	233	601	831	573	566
ENSBTAG00000008562	143	133	190	83	81	63	11	49	334	154	169	38	153	4	62	18	1	38	190	17	82	25	110	291	298	212	50	151	214	22	170	194	133	262	400	361	201
ENSBTAG00000012581	146	126	131	387	303	375	83	295	841	385	422	73	472	40	252	46	60	211	196	15	133	28	165	191	302	353	88	187	491	72	329	555	369	298	283	222	230
ENSBTAG00000018059	19	32	19	2	7	3	0	1	36	57	52	5	23	0	2	0	0	0	88	17	90	18	91	90	201	105	13	50	41	6	48	53	33	360	271	194	259
ENSBTAG00000009391	432	444	453	183	231	213	36	115	1738	1157	986	181	830	39	129	38	45	129	2449	247	1523	322	1894	1261	2483	2847	425	1468	186	25	192	210	118	531	697	632	497
ENSBTAG00000005604	2	2	0	4432	3424	4403	856	3962	4	4	0	0	0	70	384	135	134	417	0	0	0	0	2	64	12	12	2	8	2	2	4	28	79	0	4	3	6
ENSBTAG00000002182	984	1012	760	10806	7748	14850	2082	9357	5372	3749	3218	726	3178	885	5203	1386	1471	6070	1668	153	917	254	1259	998	1231	1759	312	951	3042	411	2370	4591	3399	1041	1204	1244	1199
ENSBTAG00000001293	44	44	59	10	16	14	5	31	126	104	85	19	73	0	13	1	4	7	9	0	6	2	2	70	103	105	20	97	18	0	4	37	10	57	31	65	55
ENSBTAG00000044376	0	0	0	0	0	0	0	0	0	0	0	0	0	0	0	0	0	0	0	0	0	0	0	0	0	0	0	0	0	0	0	0	0	0	0	0	0
ENSBTAG00000053648	0	0	0	0	0	0	0	0	0	0	0	0	0	0	0	0	0	0	0	0	0	0	0	0	0	0	0	1	0	0	0	0	0	0	0	0	0
ENSBTAG00000019557	2	2	1	2	4	0	0	2	793	584	524	123	605	0	0	0	0	0	1824	234	1414	266	1838	4	5	9	2	3	1	0	0	1	0	2	2	0	6
ENSBTAG00000048057	957	452	561	290	315	263	23	167	1908	933	927	153	766	23	196	70	42	175	437	64	368	48	373	1411	1453	1009	290	1026	752	82	666	807	547	811	951	717	720
ENSBTAG00000055108	0	0	0	0	0	0	0	0	0	0	1	0	0	0	0	0	0	0	0	0	0	0	0	0	0	0	0	0	0	0	0	0	0	0	0	0	0
ENSBTAG00000001464	57	83	56	9	12	13	4	6	34	18	0	0	14	5	12	0	0	0	123	22	85	4	113	174	137	243	54	170	39	0	25	23	25	5	18	7	3
ENSBTAG00000033170	597	229	428	137	228	121	26	81	469	288	254	48	169	1	23	8	15	15	313	34	252	22	264	616	606	284	120	467	320	20	190	257	161	454	464	300	387
ENSBTAG00000022155	69234	99852	62836	6347	9580	5493	551	2746	4399	2459	1099	215	993	415	2483	457	365	1396	4031	410	2801	320	1700	12737	12480	6590	1560	5393	13732	679	4358	6931	2799	2537	3531	2098	1813
ENSBTAG00000048370	0	0	0	0	0	0	0	0	0	0	0	0	0	0	0	0	0	0	0	0	0	0	0	0	0	0	0	0	0	0	0	0	0	0	0	0	0
ENSBTAG00000015892	907	887	734	10010	8179	12585	2024	9101	4198	2722	2248	463	2047	493	2324	772	776	2878	1245	73	672	224	957	810	721	1267	166	540	2504	349	1939	2571	1970	775	877	963	812
ENSBTAG00000015895	5	0	2	98	89	212	24	121	6678	5780	5195	1444	6100	1	22	0	0	0	35732	4586	26280	5866	30763	7	8	0	4	6	3	0	1	17	4	2	12	6	9
ENSBTAG00000015898	681	544	456	835	819	1123	209	896	2104	1028	983	246	1002	81	504	143	122	456	563	57	384	119	436	619	815	909	158	497	504	80	418	665	350	567	614	707	566
ENSBTAG00000016848	366	297	299	374	327	382	44	231	703	315	282	62	326	37	301	85	76	254	301	25	179	50	203	531	596	651	101	412	277	45	205	243	183	489	571	506	448
ENSBTAG00000045436	0	0	2	0	0	0	0	0	0	0	0	0	0	0	0	0	0	0	0	0	0	0	1	0	0	1	0	0	0	0	0	0	0	0	0	0	1
ENSBTAG00000001918	0	0	1	1	2	0	0	0	69	76	15	10	20	0	4	0	2	6	2	0	6	0	6	256	223	74	27	86	0	0	6	5	2	7	12	8	0
ENSBTAG00000001920	72	11	10	6	13	2	2	2	338	248	182	35	121	0	1	0	0	4	7	0	14	1	7	61	64	41	13	36	51	13	72	36	26	156	167	98	81
ENSBTAG00000052248	0	1	0	31	40	38	6	24	14	9	14	3	11	6	27	0	7	14	2	0	0	0	1	2	0	0	0	0	0	0	0	0	0	6	0	1	4
ENSBTAG00000014508	42	8	33	2050	1767	2469	452	2198	1676	945	887	98	502	190	1170	204	250	978	42	0	12	10	10	16	6	24	2	10	5	0	2	6	16	169	111	207	109
ENSBTAG00000001009	853	593	593	303	321	223	35	156	357	350	201	31	172	10	72	7	11	35	1441	154	725	115	594	2710	4268	4037	607	2024	385	65	286	287	143	7507	10615	7698	6981
ENSBTAG00000008862	2147	1824	2240	478	813	553	92	386	5509	3334	2481	588	2323	58	283	91	68	202	1776	216	1355	188	1197	3241	3801	2316	858	2905	2484	353	2217	2639	1684	2645	3008	2210	2633
ENSBTAG00000013069	113	210	170	89	80	104	15	83	449	253	252	47	210	15	45	37	14	52	90	8	39	13	21	198	130	313	53	117	155	7	41	180	61	378	324	419	348
ENSBTAG00000013070	10	19	14	36	27	153	26	104	149	64	58	32	81	0	3	0	2	2	29	0	23	1	24	41	57	106	10	26	35	2	30	47	26	1256	1351	1416	1557
ENSBTAG00000033166	843	180	65	56	41	97	21	78	4980	3663	2206	499	2347	0	12	2	0	2	434	65	362	59	380	1227	1207	502	229	836	2	4	6	5	2	12	28	0	19
ENSBTAG00000001442	8	0	0	0	0	0	0	0	20	9	3	3	2	0	0	0	0	0	0	3	1	0	0	11	9	0	1	1	0	0	0	0	0	0	0	0	0
ENSBTAG00000004705	4	1	3	0	0	2	0	1	540	308	253	66	128	0	2	16	5	4	54	2	4	6	9	1117	922	530	138	572	11	0	6	10	17	15	30	14	17
ENSBTAG00000013118	666	494	456	132	142	102	14	65	155	70	21	24	61	9	43	6	4	41	845	34	296	79	307	1212	1591	1653	290	942	337	13	121	161	96	4366	5032	4566	5257
ENSBTAG00000003865	0	0	0	0	0	0	0	2	2212	1616	1256	175	663	0	0	0	0	0	0	0	0	0	0	0	2	0	2	2	4	0	0	1	3	10	28	8	4
ENSBTAG00000045101	0	0	0	0	0	0	0	0	0	0	0	0	0	0	0	0	0	0	0	0	0	0	0	0	0	0	0	0	0	0	0	0	0	0	4	0	2
ENSBTAG00000014133	0	0	0	0	0	0	0	0	0	0	0	0	0	0	0	0	0	0	0	0	0	0	0	0	0	0	0	0	0	0	0	0	0	1	0	0	0
ENSBTAG00000010688	0	1	0	0	0	0	0	0	0	0	0	0	0	0	0	0	0	0	0	0	0	0	0	0	0	0	0	0	4	1	26	18	11	0	1	0	0
ENSBTAG00000054520	296	252	216	1252	1103	1650	215	1160	1162	634	454	86	506	97	569	151	161	559	510	38	359	76	398	214	233	231	20	124	678	87	631	673	439	339	372	284	269
ENSBTAG00000011140	747	883	616	8629	6178	9713	1546	7478	2647	1563	1628	285	1414	385	2166	694	683	2472	2134	197	1322	329	1548	530	551	941	129	382	12493	1649	10007	15909	10145	574	455	608	567
ENSBTAG00000054326	118	111	148	76	81	104	17	72	368	153	195	38	147	9	41	24	21	64	105	17	79	20	47	114	133	144	38	100	84	4	55	61	59	191	192	205	215
ENSBTAG00000011143	853	674	614	526	550	496	116	452	1384	705	660	137	621	210	1301	341	303	1085	653	87	533	68	542	1185	1173	946	243	858	649	89	592	823	511	918	1096	897	828
ENSBTAG00000051987	0	0	2	0	0	0	0	0	2	0	0	0	0	0	0	0	0	0	0	0	0	0	0	0	0	0	0	1	0	0	0	0	0	1	0	0	1
ENSBTAG00000021791	432	374	361	251	280	211	33	136	450	206	191	40	220	5	63	19	2	32	686	74	405	74	388	1011	1330	1541	242	879	404	39	309	299	241	1497	1500	1474	1190
ENSBTAG00000009933	630	474	450	224	333	186	33	149	339	201	170	20	143	8	53	15	13	21	597	53	271	49	255	988	1298	1090	231	907	320	31	257	178	126	1221	1477	1196	1191
ENSBTAG00000016656	804	561	551	398	494	234	42	198	1050	478	375	113	362	12	82	27	7	65	1335	141	709	122	721	3017	3392	2607	569	2071	587	50	437	411	277	3696	4279	2879	3241
ENSBTAG00000005066	57	101	90	67	57	88	7	70	289	123	145	50	153	4	43	26	7	49	64	10	63	23	92	146	168	194	22	117	86	8	60	85	56	185	138	178	161
ENSBTAG00000005071	394	273	395	317	393	440	66	292	1998	986	949	188	757	38	186	59	48	156	319	38	295	32	227	878	1020	946	199	595	281	45	232	286	174	371	427	341	241
ENSBTAG00000018765	215	250	138	53	68	57	13	37	154	195	71	11	55	0	21	9	8	21	4	7	33	6	62	123	94	100	26	63	22	0	8	16	11	26	103	33	39
ENSBTAG00000053611	4	0	6	9	7	1	2	1	2	2	2	0	0	0	4	2	0	0	5	0	0	0	1	2	8	0	0	7	0	0	0	0	0	4	0	0	0
ENSBTAG00000018877	739	722	614	225	256	217	44	166	1343	845	591	190	637	5	67	12	7	37	2857	315	1771	286	1962	1638	3211	3603	486	1597	301	31	165	265	168	1677	2176	1907	2239
ENSBTAG00000014797	196	151	222	204	198	200	32	151	508	243	211	51	213	7	69	20	19	43	206	29	133	30	180	209	253	205	35	159	205	58	227	363	242	203	223	211	184
ENSBTAG00000018777	3191	1188	2116	4991	5564	5586	908	4493	474	313	98	35	120	39	107	30	39	79	448	49	390	42	428	652	680	385	145	385	161	12	62	67	77	1315	1751	1157	916
ENSBTAG00000044318	9	4	2	9	7	4	0	3	1	0	0	0	0	0	0	0	0	0	0	0	0	0	1	1	0	0	0	3	0	0	0	0	0	0	2	4	0
ENSBTAG00000023607	2165	954	879	203	276	246	35	149	6106	2915	2427	475	2147	12	82	20	13	53	1170	144	919	147	816	714	748	542	131	482	417	70	296	361	228	501	439	442	384
ENSBTAG00000023608	0	0	0	0	0	0	0	0	0	0	0	0	0	0	0	0	0	0	0	0	0	0	0	0	0	0	0	0	0	0	0	0	0	0	0	0	0
ENSBTAG00000014567	3786	1950	2344	855	1290	871	128	554	7602	4582	3692	729	3112	58	372	85	57	265	3410	494	2944	381	2565	6690	6844	2775	1235	4243	3211	356	2302	5695	8520	3310	4275	2459	1954
ENSBTAG00000054441	103	30	66	0	1	0	0	0	296	194	134	19	162	0	2	0	0	0	40	8	66	3	66	72	112	23	24	74	3	2	4	6	3	2	3	0	2
ENSBTAG00000000566	117	107	150	43	56	67	1	43	209	106	107	25	121	4	22	15	8	29	65	10	63	3	49	115	128	150	18	74	62	5	61	45	44	193	186	196	172
ENSBTAG00000006947	0	0	0	0	0	0	0	0	6	2	0	0	2	0	0	0	0	0	7	0	0	0	0	354	316	356	97	280	0	0	0	0	0	2	2	0	0
ENSBTAG00000044700	0	0	0	0	0	0	0	0	0	0	0	0	0	0	0	0	0	0	0	0	0	0	0	0	0	0	0	0	0	0	0	0	0	0	0	0	0
ENSBTAG00000002640	255	203	324	58	84	107	18	42	87	35	33	3	51	3	26	8	4	27	14	0	4	5	10	95	130	51	12	77	64	5	39	69	20	44	78	32	28
ENSBTAG00000053238	394	356	553	1038	1047	1014	198	924	1055	528	508	120	513	68	351	42	82	298	1121	142	909	125	538	601	573	546	181	599	368	119	596	801	474	563	720	506	368
ENSBTAG00000013727	513	470	436	276	259	226	31	204	1957	1148	996	178	837	21	141	50	26	122	1008	129	745	145	733	737	730	839	113	467	927	114	952	1266	742	955	1023	992	948
ENSBTAG00000013755	7004	17186	19241	3849	5244	5200	774	3642	13328	8734	5837	1448	6501	207	1256	265	307	1141	4883	671	3729	611	4789	4494	5487	4898	1421	4538	7155	779	4899	6385	5942	3242	3047	4338	4638
ENSBTAG00000010382	0	1	0	0	0	2	0	2	2	2	0	0	2	0	0	0	0	0	0	0	0	0	0	0	2	2	2	2	0	0	5	2	0	1	6	2	2
ENSBTAG00000048794	1	2	0	0	0	0	0	0	0	0	0	0	4	0	0	0	0	0	0	0	0	0	0	0	0	0	0	0	0	0	2	0	0	0	4	2	0
ENSBTAG00000021396	5384	4389	3911	1149	2013	1223	236	868	2456	1604	1085	250	896	41	223	60	34	164	729	74	391	43	386	4537	6497	1959	1248	4413	1146	96	510	1050	333	1604	1701	1109	1394
ENSBTAG00000000496	22	23	18	2	5	6	0	2	8	17	12	0	4	0	0	0	1	2	27	0	6	0	19	15	22	26	2	24	20	4	17	29	11	9	11	18	18
ENSBTAG00000050482	521	409	489	148	175	154	32	141	918	483	491	117	421	40	174	51	37	177	219	31	209	36	177	705	787	528	157	487	284	45	334	353	190	753	823	652	617
ENSBTAG00000011383	1332	1354	1372	1023	1087	1219	198	1011	3947	1908	1930	437	1856	86	469	146	87	387	941	114	508	101	607	2765	2747	3003	503	1979	1108	143	841	1108	643	1609	1473	1435	1352
ENSBTAG00000006471	394	319	406	574	529	495	95	517	959	702	553	95	496	56	290	123	58	231	346	44	306	65	261	654	789	474	92	462	321	43	311	330	191	774	757	526	590
ENSBTAG00000003383	30	34	30	14	15	28	0	17	61	29	23	12	22	2	5	0	1	14	47	10	23	3	39	53	50	33	7	23	45	1	43	68	60	37	39	40	36
ENSBTAG00000044172	72	65	69	31	45	32	0	20	181	73	75	24	75	0	2	7	4	7	55	7	55	6	17	175	215	105	26	119	46	8	55	59	37	108	115	110	59
ENSBTAG00000045455	0	0	0	0	0	0	0	0	0	0	0	0	0	0	0	0	0	0	0	0	0	0	0	0	0	0	0	0	1	2	0	0	0	0	0	0	0
ENSBTAG00000014208	15515	29299	18904	15273	15424	19930	2856	12782	16924	9603	9825	2308	10003	853	4884	1316	1285	4678	9189	798	4853	1041	5758	11237	13784	21204	2977	10689	35056	4537	26783	37730	27754	35299	32399	33216	32076
ENSBTAG00000018025	27	27	6	16	20	25	2	17	292	182	136	15	119	0	3	0	2	4	34	4	19	10	31	206	166	176	41	142	55	6	27	42	22	26	52	57	33
ENSBTAG00000032839	885	949	847	268	404	266	39	246	963	584	560	96	373	37	220	81	53	177	228	47	128	31	171	1165	1358	794	261	936	294	31	234	260	115	890	1003	745	696
ENSBTAG00000042610	5	12	5	5	8	3	1	6	7	9	12	0	4	0	2	1	0	0	4	0	0	0	1	3	2	25	4	4	4	0	1	2	3	46	18	34	45
ENSBTAG00000054586	1	13	3	3	2	2	0	0	4	0	6	0	7	0	1	2	0	0	1	0	0	0	0	1	1	14	1	2	2	0	0	7	0	29	7	37	28
ENSBTAG00000014874	648	539	474	478	444	561	94	364	1086	584	538	75	496	151	819	295	192	829	383	41	321	43	329	635	658	568	102	428	661	95	603	797	602	600	718	680	547
ENSBTAG00000001890	413	361	299	105	121	99	15	70	979	831	578	114	528	4	58	16	6	38	218	16	142	28	149	610	983	588	168	647	303	56	226	296	164	837	1113	646	633
ENSBTAG00000032819	8	19	21	7	11	9	0	22	3918	2057	2234	264	1087	0	4	2	0	2	173	31	162	20	137	35	34	13	18	56	533	67	356	385	976	0	4	3	13
ENSBTAG00000014721	5	4	2	0	0	2	1	4	5	0	4	0	0	14	46	2	4	30	1	0	2	0	0	32	64	62	6	49	2	0	4	3	4	0	0	0	2
ENSBTAG00000021364	2171	1659	1932	1221	2052	1273	253	1098	1771	1729	1039	202	889	326	1809	310	348	1222	943	107	678	74	558	5259	5342	5383	975	3294	1527	283	1440	1196	1071	3426	4868	2801	3260
ENSBTAG00000049459	225	185	185	108	141	107	18	115	202	127	122	18	114	10	69	21	23	85	83	7	55	6	54	429	596	349	104	282	168	33	154	142	102	361	408	305	346
ENSBTAG00000032719	516	269	190	2153	2105	908	152	779	6733	3604	1785	338	1358	428	2587	222	591	2366	1394	212	1306	94	1403	1878	1877	930	392	1197	1416	279	1785	1053	777	1908	3428	677	974
ENSBTAG00000021515	21	3	16	12	20	18	0	5	33	16	13	5	15	0	6	0	1	3	116	9	88	28	154	42	43	56	13	57	58	7	80	59	47	44	54	46	50
ENSBTAG00000012347	3	2	4	0	2	1	0	2	461	400	723	208	933	0	7	0	0	5	2	0	7	3	5	7	0	5	1	3	12	2	0	4	1	0	0	5	4
ENSBTAG00000016979	596	423	455	276	287	263	41	199	691	440	345	57	340	39	277	83	65	252	436	74	384	29	319	747	829	399	149	565	542	88	420	551	328	419	583	354	306
ENSBTAG00000032684	115	131	119	560	382	632	73	493	610	346	327	81	407	20	81	15	39	97	140	13	47	10	88	157	155	280	38	138	129	11	93	176	106	203	249	294	287
ENSBTAG00000040161	24	5	8	2	8	0	0	0	3	2	7	3	4	0	0	0	0	0	79	5	19	9	23	99	263	192	45	257	9	0	3	4	4	80	52	36	31
ENSBTAG00000007577	444	272	319	147	209	135	26	97	831	443	414	81	318	15	75	31	17	30	286	59	287	26	217	571	838	425	134	576	392	70	363	461	311	663	881	540	555
ENSBTAG00000013317	680	653	598	336	326	325	45	183	991	593	511	93	398	46	277	86	73	239	421	77	335	43	362	988	1175	1098	213	827	532	84	358	519	343	1096	1192	1101	1190
ENSBTAG00000013319	0	2	0	591	442	648	127	637	6	6	3	0	4	49	445	129	162	471	1	0	6	0	2	0	2	0	0	6	2	0	0	0	0	0	0	0	2
ENSBTAG00000014660	233	348	286	221	307	355	54	199	411	284	230	45	227	36	144	54	42	126	228	24	126	34	142	296	347	505	44	218	375	31	333	437	261	308	317	332	260
ENSBTAG00000006388	112	122	127	73	96	59	15	43	182	150	60	11	66	20	102	26	22	81	68	14	57	4	73	161	232	130	39	112	206	20	148	219	96	147	214	165	166
ENSBTAG00000009614	1021	506	773	295	351	183	42	130	326	281	93	30	103	14	97	15	26	40	466	49	326	37	204	1540	3007	1956	419	1438	127	4	30	92	43	2891	3895	2134	2329
ENSBTAG00000013192	221	298	217	239	237	343	55	262	366	155	192	51	202	13	137	33	32	105	142	6	77	22	119	102	122	173	29	103	268	38	232	337	236	111	139	138	150
ENSBTAG00000049165	36	39	37	11	18	19	0	5	122	85	65	15	57	2	4	4	0	8	50	5	50	4	34	60	77	52	14	45	72	11	70	95	55	71	64	59	69
ENSBTAG00000048195	71	67	75	29	42	41	4	17	356	157	165	40	175	5	18	5	2	2	183	30	118	22	145	131	148	140	13	82	116	14	92	177	125	158	141	151	129
ENSBTAG00000047856	2899	2114	1981	969	1265	1137	163	714	3935	1806	2065	483	1862	143	744	232	150	530	1467	171	892	193	998	3013	3186	3290	610	1967	1542	248	1376	1930	1116	3502	3771	3733	3351
ENSBTAG00000032674	282	222	267	119	147	79	17	97	454	232	207	39	189	21	107	20	13	90	147	27	129	24	106	460	512	268	97	332	212	23	192	226	119	589	646	458	491
ENSBTAG00000008873	1136	1105	1156	2388	1749	2496	387	1942	2988	1590	1413	321	1362	89	515	144	94	423	1386	110	792	129	952	1199	1215	1429	291	935	1944	269	1539	1831	1429	1848	1903	1802	1782
ENSBTAG00000048390	198	338	215	335	332	508	55	280	626	518	463	88	312	24	142	44	61	166	258	14	183	47	195	117	199	261	43	131	386	51	254	368	281	156	168	183	137
ENSBTAG00000011659	417	376	402	535	834	551	107	492	1298	1368	856	174	786	121	704	117	182	741	591	116	668	109	617	909	836	1085	173	580	279	46	313	357	368	46	57	56	75
ENSBTAG00000002998	0	9	2	0	4	2	0	1	55	22	18	7	27	0	0	1	0	3	7	2	6	0	8	103	122	45	29	131	0	6	4	2	0	25	38	60	56
ENSBTAG00000020378	782	720	729	414	414	376	62	335	1639	945	1017	162	719	58	339	96	67	238	534	52	426	57	470	2593	2711	1573	455	1766	1561	216	1531	1642	1188	555	903	494	546
ENSBTAG00000045354	0	0	0	0	0	0	0	0	0	0	0	0	0	0	0	0	0	0	0	0	0	0	0	0	0	0	0	0	6	0	0	0	0	1	0	0	0
ENSBTAG00000051739	0	0	0	0	0	0	0	0	0	0	0	0	0	0	0	0	0	0	0	0	0	0	0	0	0	0	0	0	0	0	0	0	0	0	0	0	0
ENSBTAG00000048826	0	0	0	0	0	0	0	0	0	0	0	0	1	0	0	0	0	0	0	0	0	0	0	0	0	0	0	0	0	0	0	0	0	2	0	0	2
ENSBTAG00000053541	0	0	0	112	83	30	4	58	0	0	0	0	0	0	0	0	0	0	0	0	0	0	0	0	0	0	0	0	0	0	0	0	0	0	0	0	0
ENSBTAG00000048225	141	183	136	79	198	191	45	130	58	95	58	3	35	11	68	6	17	64	52	12	76	7	81	39	85	99	5	67	132	43	252	262	267	75	147	95	102
ENSBTAG00000000448	7001	1362	381	14959	7441	11079	2139	9496	12786	7234	4010	668	2700	38	156	10	40	236	21	0	9	2	13	56	71	23	6	43	22123	2206	12414	17590	15336	51	94	62	97
ENSBTAG00000052232	4	0	0	0	0	1	0	0	5	2	1	0	0	35	154	42	51	155	0	0	0	0	0	4	0	0	0	2	0	0	0	0	1	0	0	0	0
ENSBTAG00000023600	1547	1313	5553	64	146	102	19	140	4857	3131	1763	698	3228	96	560	107	156	696	87	10	60	5	129	592	672	548	324	1200	1316	132	877	1073	962	71	307	46	144
ENSBTAG00000050331	0	0	0	0	0	0	0	0	10	0	0	0	0	0	0	0	0	2	0	0	0	0	0	0	0	0	0	0	0	0	0	0	0	0	0	0	0
ENSBTAG00000006724	1973	1205	1503	772	761	785	125	601	2164	1220	1021	202	924	456	2652	625	681	2715	459	60	287	37	282	1410	1589	880	304	1054	1346	163	1222	1507	1215	1135	1398	1037	1187
ENSBTAG00000003378	229	138	172	22	76	53	4	55	218	137	105	16	110	4	30	8	6	14	78	10	92	11	79	323	403	151	55	246	192	31	215	182	158	335	446	331	385
ENSBTAG00000036946	0	2	2	0	0	0	0	0	0	0	0	0	0	0	0	0	0	0	0	0	0	0	0	0	0	0	0	0	0	0	0	0	0	0	0	0	0
ENSBTAG00000054986	495	334	458	97	125	118	12	69	432	217	252	41	166	8	43	11	8	69	179	33	157	25	94	667	750	343	122	498	323	28	318	304	260	667	852	601	543
ENSBTAG00000014564	573	394	459	310	275	234	33	135	1867	1258	932	134	584	52	214	53	60	198	969	162	934	130	772	764	581	429	132	420	928	84	365	528	506	530	498	431	412
ENSBTAG00000008462	2073	1683	2522	981	1608	1074	145	710	795	655	228	53	163	30	249	37	56	179	170	22	141	27	117	2518	2366	1985	244	776	1742	200	1141	1176	938	2083	2253	2554	2337
ENSBTAG00000008461	463	644	712	336	345	346	51	248	1058	595	485	108	528	82	457	114	82	390	404	44	273	49	378	1110	1128	1040	194	747	479	107	503	559	521	884	664	608	522
ENSBTAG00000002394	454	471	666	154	255	142	11	108	183	129	54	18	78	18	80	15	18	69	18	2	18	2	13	801	948	854	170	617	173	33	122	163	134	166	163	163	145
ENSBTAG00000045117	1	2	2	0	0	0	0	0	0	0	0	0	0	0	0	0	0	0	0	0	0	0	0	7	1	0	0	1	0	0	0	0	0	0	0	2	0
ENSBTAG00000013204	2640	2491	2107	564	756	506	85	447	6224	2860	3030	648	2987	26	131	51	26	113	1412	213	1277	147	1034	4140	6099	2385	882	3143	1434	156	775	1161	576	2985	5918	2423	2812
ENSBTAG00000013203	4	2	0	49	51	42	8	41	37	14	12	2	4	2	4	0	2	4	141	7	71	7	71	14	19	5	10	26	16	2	19	24	20	20	15	3	5
ENSBTAG00000038600	3	2	0	3	2	9	0	1	26	16	22	2	11	2	7	2	2	12	0	0	4	0	5	19	0	8	4	22	3	0	2	1	0	0	0	0	0
ENSBTAG00000032656	17	0	0	427	526	769	104	446	654	862	1031	144	623	0	5	0	0	2	11332	1460	8808	1585	10826	51	32	49	17	34	5	0	0	2	0	0	0	0	2
ENSBTAG00000048497	4	1	9	12	6	6	3	6	19	6	6	3	2	0	0	0	0	0	0	1	3	0	2	25	13	21	4	8	4	0	5	7	0	26	23	34	28
ENSBTAG00000000569	575	586	934	898	1253	617	99	453	1083	1353	1114	185	653	349	2086	313	158	578	437	31	311	48	571	3317	1810	4417	480	1758	887	82	581	1132	852	468	632	803	760
ENSBTAG00000019514	858	581	615	838	798	943	163	789	2698	1367	1278	346	1234	102	715	157	150	598	644	76	513	86	566	694	730	670	156	573	843	133	790	935	674	993	828	766	829
ENSBTAG00000016305	16	21	17	2	0	0	0	2	48	8	9	2	6	0	0	0	0	0	2	0	3	0	0	522	349	299	152	425	0	0	0	4	0	8	78	7	2
ENSBTAG00000054354	0	0	0	0	0	0	0	0	0	0	0	0	0	0	0	0	0	0	0	0	0	0	0	0	0	0	0	0	0	0	0	0	0	0	0	0	0
ENSBTAG00000018657	4	0	0	0	0	1	0	0	0	0	4	0	0	0	0	0	0	0	0	0	0	0	0	1	2	1	0	0	0	0	1	0	0	5	0	4	0
ENSBTAG00000035844	20	9	13	2677	2529	3753	719	3423	426	153	90	19	144	295	1715	642	438	1603	12	0	0	0	4	31	13	36	6	14	4	2	3	10	1	47	34	38	34
ENSBTAG00000005430	109	87	134	42	68	50	12	58	991	612	585	106	380	8	71	19	32	73	235	36	128	29	164	429	466	325	103	284	105	12	114	123	86	552	952	600	589
ENSBTAG00000053503	0	4	12	0	0	0	0	0	0	2	3	0	0	0	0	0	0	0	0	0	0	0	0	0	0	0	0	0	0	0	0	1	1	2	1	1	3
ENSBTAG00000055130	0	0	0	0	0	0	0	0	0	0	0	0	0	0	0	0	0	0	0	0	0	0	0	0	0	0	0	0	0	0	0	0	0	0	0	0	0
ENSBTAG00000012413	181	73	115	92	117	47	3	28	48	29	25	8	13	5	12	3	1	7	468	110	601	78	464	39	24	47	4	37	31	16	53	70	26	35	54	67	87
ENSBTAG00000054301	0	0	0	0	0	0	0	0	0	0	0	0	0	0	0	0	0	0	0	0	0	0	0	0	0	0	0	0	0	0	0	0	0	0	0	0	0
ENSBTAG00000006945	921	727	639	289	322	310	26	179	2243	1160	1259	256	1098	4	29	13	14	52	484	44	290	67	377	1553	1420	1230	254	960	399	51	279	373	232	1141	1431	1068	1407
ENSBTAG00000044148	0	0	0	0	0	0	0	0	0	0	0	0	0	0	0	0	0	0	0	0	0	0	0	0	0	0	0	2	0	0	0	0	0	0	0	0	0
ENSBTAG00000018703	0	2	10	0	0	0	0	4	2	0	2	0	0	0	0	0	1	2	32	2	9	2	8	71	39	143	29	98	1	0	6	10	0	117	164	105	134
ENSBTAG00000050537	0	0	1	0	0	0	0	0	0	0	0	0	0	0	0	0	0	0	0	0	2	0	2	0	4	1	0	0	0	0	0	0	0	7	4	1	3
ENSBTAG00000051592	6	2	2	1	0	0	0	0	34	16	12	0	12	0	1	0	0	0	0	0	1	2	4	36	32	20	1	27	4	0	1	6	0	0	1	0	0
ENSBTAG00000006813	15	29	15	13	12	19	0	22	13	4	18	5	5	3	6	3	0	5	15	0	4	2	6	12	18	33	1	15	28	3	30	57	61	14	16	18	11
ENSBTAG00000013205	73	65	132	30	41	22	1	24	209	153	95	21	91	0	8	10	0	10	1355	180	1094	181	1143	332	330	186	104	223	403	80	396	412	301	186	291	135	163
ENSBTAG00000013456	0	0	0	0	0	0	0	0	350	341	231	24	97	0	1	0	0	0	0	0	0	0	0	9	2	9	9	6	0	0	0	0	0	0	2	0	0
ENSBTAG00000006494	0	0	4	0	0	0	0	0	1355	949	842	98	392	0	0	0	0	0	0	0	0	0	5	0	2	0	0	0	4	0	5	14	8	2	4	0	0
ENSBTAG00000013148	57	82	15	42	59	35	6	10	715	257	138	31	128	12	13	4	2	12	1531	281	1460	147	939	1303	1240	580	206	786	3212	462	2936	3301	2800	208	506	47	90
ENSBTAG00000021025	422	409	567	161	311	263	26	153	6854	4384	3903	858	3602	19	132	24	17	47	594	80	403	60	307	2382	1661	1146	255	710	250	43	244	324	163	1738	1810	1970	1546
ENSBTAG00000015460	14	5	2	8	0	1	0	0	0	2	0	0	0	27	173	67	44	177	3	0	2	0	0	25	13	3	0	14	3473	504	2859	3848	2367	0	4	10	6
ENSBTAG00000053900	0	11	17	0	0	3	2	2	4	0	0	0	0	2	2	3	2	2	0	0	0	0	0	0	0	0	4	0	24	1	5	13	14	0	2	0	0
ENSBTAG00000032538	8	64	56	0	2	7	2	0	56	8	37	6	15	0	2	0	0	19	0	2	0	0	0	0	0	4	0	4	529	47	239	541	412	2	6	0	0
ENSBTAG00000044001	316	150	198	192	187	162	17	98	329	164	216	20	134	3	46	23	12	55	179	17	143	20	146	580	726	160	118	362	224	26	208	265	178	274	392	200	128
ENSBTAG00000036372	0	0	0	0	0	0	0	0	0	0	0	0	0	0	0	0	0	0	0	0	0	0	0	0	0	0	0	0	0	0	0	0	0	0	0	0	0
ENSBTAG00000049984	0	4	0	2	0	2	0	0	12	0	2	0	0	0	0	0	0	0	0	0	0	0	0	0	0	4	0	0	0	0	0	2	0	15	0	11	0
ENSBTAG00000055241	399	241	67	1373	1254	1561	163	919	0	0	4	0	4	0	15	8	0	0	525	19	142	49	218	0	0	8	0	2	2	0	6	0	4	34	24	21	43
ENSBTAG00000001511	2330	1557	2001	452	682	603	119	522	542	706	316	104	413	976	5950	605	557	2201	593	65	352	32	266	2025	2522	1688	535	1810	853	127	794	1356	945	3470	4620	1730	1628
ENSBTAG00000003179	0	0	0	0	0	0	0	0	0	0	0	0	0	0	0	0	0	0	0	0	0	0	0	0	0	0	0	0	0	0	0	0	0	0	0	0	0
ENSBTAG00000017312	0	0	4	0	0	0	0	0	4	0	2	0	2	0	0	4	0	0	2	0	0	0	0	0	3	2	0	0	8	0	0	6	0	0	2	2	0
ENSBTAG00000032265	181	190	223	165	199	129	6	67	105	77	46	16	34	2	14	9	2	10	428	32	149	31	189	196	271	155	67	223	73	11	21	23	15	313	362	284	301
ENSBTAG00000012467	3143	1440	1626	928	1316	883	194	958	461	293	46	30	156	97	548	200	169	523	7215	925	5112	742	6556	1955	2029	658	154	458	136	2	56	117	40	13	12	20	10
ENSBTAG00000012706	0	0	0	0	0	0	0	0	0	0	0	0	0	0	0	0	1	0	0	0	0	0	0	0	0	0	0	0	0	0	0	0	0	0	0	0	0
ENSBTAG00000010357	618	714	652	564	688	675	78	471	993	958	599	191	766	18	59	7	10	36	5301	596	3664	675	3668	1478	1337	1151	244	945	450	48	264	490	161	2869	2586	2356	2567
ENSBTAG00000045003	0	0	0	0	0	0	0	0	0	0	0	0	0	0	0	0	0	0	0	0	0	0	0	0	0	0	0	0	0	0	0	0	0	0	0	0	0
ENSBTAG00000006872	7	6	11	6	14	2	2	7	32	18	13	4	21	0	6	0	0	0	10	0	5	0	2	32	42	26	10	23	10	2	6	7	2	26	56	38	24
ENSBTAG00000052213	30887	18145	11057	13	17	84	0	4	4	11	3	0	4	54	422	242	82	291	0	0	4	0	2	4	12	0	0	2	30	0	13	8	1	4	18	0	6
ENSBTAG00000014727	219	202	139	313	260	409	62	270	379	195	148	22	132	18	146	56	31	109	228	36	175	36	127	302	333	306	56	157	423	79	344	404	243	453	479	393	417
ENSBTAG00000014724	11173	12397	9158	13954	13436	19470	3087	14600	21017	11229	10648	2381	9959	2696	15771	3818	3356	12798	8955	1330	7662	1299	7185	11896	11676	16503	2237	7424	10525	1506	8989	13754	8931	15078	13512	13992	12107
ENSBTAG00000042702	6	4	2	3	2	1	0	2	12	4	2	2	1	0	4	1	3	2	2	1	1	1	0	15	12	22	4	4	3	2	11	16	5	31	28	25	19
ENSBTAG00000042475	0	2	3	2	0	0	0	0	4	2	0	1	1	0	0	0	0	0	0	0	1	0	1	5	0	9	1	2	9	0	5	3	6	17	10	5	4
ENSBTAG00000044788	0	0	0	0	0	0	0	0	0	1	0	0	1	0	1	0	0	0	0	0	1	0	1	0	0	2	0	1	0	1	0	1	0	1	4	2	2
ENSBTAG00000050812	0	0	0	0	0	0	0	0	0	0	0	0	0	0	0	0	0	0	0	0	0	0	0	0	0	0	0	0	0	0	0	0	0	0	0	0	0
ENSBTAG00000044311	3	1	1	0	1	4	0	0	15	5	8	2	5	0	0	0	0	0	0	0	1	0	4	7	14	24	2	9	3	1	5	10	1	30	17	13	7
ENSBTAG00000005122	13	0	9	25	46	0	1	10	25	14	5	2	11	2	27	10	0	13	81045	12474	75235	19405	82787	23	10	8	0	14	47	6	23	93	54	8	10	2	22
ENSBTAG00000001265	2	0	2	11	14	0	0	2	28	36	30	6	29	2	8	5	0	4	37714	5083	29515	6662	44298	7	0	0	0	0	8	0	2	12	6	4	2	2	6
ENSBTAG00000017531	0	0	0	0	0	0	0	2	0	0	0	0	0	0	0	0	0	0	3412	497	2841	728	4302	0	0	0	0	0	30	2	11	66	42	4	0	0	0
ENSBTAG00000000522	14	0	11	73	143	0	2	12	23	58	3	2	12	0	32	9	2	14	324054	27468	158143	23684	167169	54	15	0	2	14	363	48	267	396	490	25	20	2	17
ENSBTAG00000003151	714	852	716	872	704	810	123	641	1953	945	852	156	819	42	248	64	54	205	1868	105	645	189	1170	1273	1058	1105	212	783	2437	378	2219	2634	2504	1388	1608	1246	1515
ENSBTAG00000003143	332	291	250	160	258	186	18	136	280	273	195	43	172	4	71	13	11	55	153	16	85	15	84	321	448	411	107	248	155	19	128	139	96	349	441	400	394
ENSBTAG00000003140	3	2	5	6	1	0	0	1	12	4	2	2	6	0	2	0	2	0	4	3	2	0	8	7	6	17	2	10	96	23	122	72	86	26	8	6	20
ENSBTAG00000005091	20	5	7	3	18	3	0	4	20	9	6	10	21	0	1	0	2	4	40	6	55	3	21	67	154	86	3	78	8	0	6	9	27	40	66	41	43
ENSBTAG00000014915	353	713	826	95	113	156	15	88	1285	1343	1456	320	1321	16	103	29	37	105	138	20	121	26	86	1133	2269	1186	445	1378	134	23	109	149	106	953	2137	999	1353
ENSBTAG00000011305	0	4	0	0	4	1	0	6	10	0	2	0	0	0	2	0	0	0	2	0	0	0	0	0	0	0	0	2	501	44	294	687	443	0	0	6	0
ENSBTAG00000043831	0	0	0	0	0	0	0	0	0	0	0	0	0	0	0	0	0	0	0	0	0	0	0	0	0	0	0	0	6	0	2	1	4	0	0	0	0
ENSBTAG00000001697	2358	2211	2323	1578	1231	1392	200	865	4927	2640	2342	513	2044	184	893	274	196	683	1932	185	1074	204	1213	3139	3662	3288	596	2071	3562	423	2803	3239	2147	4468	4094	3598	3396
ENSBTAG00000007666	37	83	75	31	95	129	12	52	377	384	262	97	333	12	80	6	15	42	6	4	3	0	11	339	442	171	53	168	415	48	166	329	235	22	39	18	14
ENSBTAG00000001749	780	1010	964	620	712	717	127	582	2173	1393	1404	203	1156	199	1020	295	194	763	999	166	928	138	747	1061	1396	1365	323	964	1002	133	838	1089	791	1427	1370	1219	1170
ENSBTAG00000001535	0	0	0	0	0	0	0	0	25	24	16	2	13	2	0	0	0	0	84	4	55	14	56	19	5	12	0	23	640	111	571	792	727	0	0	0	0
ENSBTAG00000051908	0	0	0	0	0	0	0	0	0	0	0	0	0	0	0	0	0	0	2	0	0	0	0	0	0	0	0	0	2	0	0	2	0	0	0	0	0
ENSBTAG00000029106	0	0	0	0	0	0	0	0	0	0	0	0	2	0	0	0	0	0	0	0	0	0	0	0	0	0	0	0	0	1	10	4	3	0	0	0	0
ENSBTAG00000017115	371	373	384	214	292	244	42	142	1059	536	469	101	463	31	209	62	54	170	413	33	261	68	239	714	735	1016	153	510	551	69	511	548	474	592	638	670	609
ENSBTAG00000017103	91	62	96	22	54	22	10	14	654	396	227	54	287	0	17	0	0	15	772	140	849	87	765	162	297	96	68	198	40	2	28	43	22	124	248	114	98
ENSBTAG00000019625	1567	639	383	217	210	120	32	142	36990	24864	20965	3948	17453	47	293	20	24	164	7548	1469	8138	1215	7857	888	927	626	165	670	309	24	205	194	200	571	880	574	507
ENSBTAG00000007296	178	170	188	98	94	124	17	78	185	111	109	10	49	2	18	12	6	12	62	2	26	4	26	235	230	166	26	139	173	36	204	227	174	244	186	209	162
ENSBTAG00000005212	229	149	265	72	99	46	7	40	175	113	92	24	61	9	36	14	9	17	49	6	38	0	25	268	311	167	53	206	74	4	43	59	42	348	378	323	226
ENSBTAG00000005209	471	481	482	176	199	185	16	138	807	457	455	100	373	31	275	80	39	262	225	29	162	37	160	725	788	768	147	599	435	51	380	417	307	519	668	565	442
ENSBTAG00000053175	0	0	0	0	0	0	0	0	0	0	0	0	0	0	0	0	0	0	0	0	0	0	0	0	0	0	0	0	0	0	0	0	0	0	0	0	0
ENSBTAG00000050932	72	54	61	27	29	16	4	18	127	59	62	12	61	2	12	10	14	39	28	1	16	3	10	112	105	47	35	68	72	5	36	64	30	66	81	68	81
ENSBTAG00000048837	4	0	2	0	0	0	0	0	0	0	0	0	0	0	0	0	0	0	0	0	0	0	0	2	0	0	0	0	22	0	8	20	20	0	0	0	0
ENSBTAG00000019014	377	482	562	303	242	277	36	156	1384	885	733	82	475	8	59	11	13	46	263	26	118	23	109	685	541	663	113	405	790	91	423	622	391	374	453	459	387
ENSBTAG00000050833	18	0	48	0	0	0	0	0	0	0	0	0	2	0	0	0	2	2	0	0	0	0	0	4	4	0	2	6	11	0	8	10	2	0	0	1	4
ENSBTAG00000048858	0	0	0	0	0	0	0	0	0	0	0	0	0	0	0	0	0	0	0	0	0	0	0	0	0	0	0	0	0	0	0	0	0	0	0	0	0
ENSBTAG00000005313	323	313	665	37	47	12	12	25	489	545	308	47	182	8	29	13	8	22	67	6	37	2	49	1517	1324	1532	429	1494	2696	493	2694	2959	2645	146	190	75	105
ENSBTAG00000008343	1	0	2	0	0	0	0	0	0	0	0	0	0	0	0	0	0	0	0	0	0	0	0	1	6	1	2	4	198	3	23	36	49	0	0	0	0
ENSBTAG00000050376	0	0	0	0	0	0	0	0	0	0	0	0	0	0	0	0	0	0	0	0	0	0	0	0	0	0	0	2	0	0	0	0	0	0	0	0	0
ENSBTAG00000002878	307	627	868	156	248	190	15	100	1682	1201	604	190	730	44	191	68	41	194	3905	590	3717	517	3159	537	906	529	107	340	408	42	195	283	149	268	364	260	322
ENSBTAG00000000476	13	40	51	11	16	15	3	6	21	19	2	2	10	2	19	6	6	15	144	16	88	19	134	33	45	41	4	20	22	0	10	10	9	5	13	9	11
ENSBTAG00000040199	659	970	772	937	884	1121	157	724	1950	1256	1301	286	1123	84	520	116	120	422	819	117	651	132	670	763	866	1104	167	668	2302	219	1396	2765	1997	1053	1041	1107	1066
ENSBTAG00000012284	128	153	159	45	62	51	5	29	462	398	335	74	307	10	40	3	13	31	159	45	252	28	155	140	233	158	55	151	2056	94	544	2147	1640	516	585	260	246
ENSBTAG00000012273	407	411	420	602	624	586	88	438	436	327	186	38	165	101	548	81	105	410	109	16	78	10	67	578	528	472	92	375	552	65	312	572	405	467	614	318	289
ENSBTAG00000012881	9108	6873	6565	3148	3791	3132	481	2376	15995	10319	8670	1693	7151	1244	7210	1377	1236	5056	7485	963	5783	873	6058	10108	10674	9953	2371	7572	13666	1969	11889	14677	11110	6068	8580	5697	5451
ENSBTAG00000042094	0	1	0	0	0	0	0	0	0	0	0	0	0	0	0	0	0	0	0	0	0	0	0	0	1	0	0	1	0	0	0	0	0	3	0	0	0
ENSBTAG00000005660	6178	5174	5086	4345	3658	4944	859	4045	9200	6141	5117	1085	4298	842	4914	1100	1377	5278	3988	551	3053	528	3164	6023	6637	6309	1454	4482	7570	1078	6308	7987	5641	3245	4318	3517	3145
ENSBTAG00000005658	266	433	371	24	106	119	6	32	112	77	93	8	53	5	30	24	6	32	38	2	31	6	31	152	236	253	33	130	249	28	155	248	131	26	61	52	64
ENSBTAG00000005657	24	20	32	6	8	4	0	4	20	21	8	4	9	0	6	1	0	0	4	3	0	0	13	59	35	12	3	8	31	6	16	18	4	10	10	4	4
ENSBTAG00000051586	179	117	128	160	126	195	26	120	364	261	224	39	216	13	81	17	11	57	287	37	188	32	225	80	106	119	20	63	307	34	276	428	298	72	82	80	111
ENSBTAG00000005652	420	344	270	197	203	187	35	160	939	712	610	73	418	40	174	37	34	115	800	72	516	92	625	475	437	501	83	334	835	132	732	724	743	360	384	288	309
ENSBTAG00000040399	4	27	28	6	7	9	4	1	12	9	6	2	7	2	2	2	0	4	9	1	0	0	4	22	28	33	9	16	36	2	12	9	16	13	22	20	22
ENSBTAG00000040245	0	0	0	0	0	0	0	0	0	0	0	0	0	0	0	0	0	0	0	0	0	0	0	0	0	0	0	0	0	0	0	0	0	0	0	0	0
ENSBTAG00000006920	1610	1558	1289	1227	1079	1199	202	825	3297	2149	1611	334	1459	134	976	173	191	658	1300	165	952	189	1021	1576	1856	1862	412	1395	1797	262	1381	1677	1261	1230	1424	1347	1080
ENSBTAG00000020106	8818	8866	8312	5844	6231	6423	1070	4961	13477	8148	6814	1431	5982	438	2944	812	716	2840	7331	800	4768	914	5758	9628	11027	9530	2057	7127	6163	709	4211	5872	4220	6029	7269	6702	5942
ENSBTAG00000019336	2655	1917	2621	1257	1592	1342	177	888	4296	3304	2003	373	1553	167	982	230	247	867	1665	224	1348	216	1407	2767	2741	1842	516	1814	2004	200	1286	1444	1336	1887	2262	1376	1356
ENSBTAG00000011414	1050	1049	962	563	694	631	126	513	2157	1306	877	231	936	108	684	141	170	680	1016	107	702	95	605	1370	1557	1826	311	1013	1881	261	1812	2024	1658	1411	1576	1333	1183
ENSBTAG00000040304	70	99	77	22	27	26	3	11	160	114	85	24	116	3	13	9	10	32	28	6	48	2	29	40	98	82	29	57	52	1	16	52	18	96	131	132	91
ENSBTAG00000016624	0	0	2	0	0	0	0	0	0	0	0	0	0	0	0	0	0	2	0	0	0	0	0	2	1	6	2	2	0	0	0	0	0	0	0	0	0
ENSBTAG00000039011	0	0	0	2	0	2	0	0	98	85	94	10	65	0	0	0	2	0	2	0	0	0	0	4	4	3	0	0	0	0	0	0	0	0	0	0	0
ENSBTAG00000017666	378	457	549	279	350	343	65	254	1278	828	572	135	676	91	657	201	112	398	696	116	798	107	635	1161	904	1182	253	912	604	58	555	603	322	629	545	550	534
ENSBTAG00000033308	4	0	0	8	5	5	1	3	13	7	0	1	1	0	0	1	0	0	4	1	2	3	7	0	1	0	0	0	0	0	1	0	0	0	0	0	0
ENSBTAG00000052825	0	0	0	0	0	0	0	0	0	0	0	0	0	0	2	0	0	0	0	0	0	0	0	0	0	0	0	2	3	0	4	4	0	4	0	0	0
ENSBTAG00000014460	1240	1478	1314	1358	1167	1757	275	1346	2313	1543	1339	292	1173	64	428	169	114	496	927	86	563	116	608	1177	1488	1801	309	918	1994	233	1594	2306	1468	1123	1329	1286	1263
ENSBTAG00000014459	258	223	301	158	206	133	12	91	226	140	62	18	77	9	62	28	15	56	35	11	36	2	29	146	164	165	36	125	86	2	53	48	36	169	168	127	95
ENSBTAG00000014451	980	765	985	363	580	321	68	325	1412	724	617	139	603	32	250	78	47	177	335	53	261	21	222	1818	1873	1263	436	1365	882	133	773	896	672	1249	1478	1098	1103
ENSBTAG00000014449	5	6	3	3	2	5	0	3	2	2	4	0	3	0	1	0	0	1	2	0	1	0	0	1	4	5	0	1	12	0	9	13	12	0	4	7	6
ENSBTAG00000017450	682	506	589	821	1012	869	118	632	1146	641	727	136	479	187	996	304	150	655	357	66	357	57	310	1038	1230	723	298	914	278	33	270	304	147	821	888	758	741
ENSBTAG00000037951	49	30	73	155	137	124	25	76	46	54	16	0	11	10	17	4	0	4	71	4	44	5	29	139	182	153	47	127	49	10	23	41	19	845	869	513	682
ENSBTAG00000042699	0	0	0	0	0	0	0	0	1	0	0	0	1	0	0	0	0	0	0	0	0	0	1	0	0	1	0	0	0	0	0	0	0	2	0	0	0
ENSBTAG00000046222	0	0	0	0	0	0	0	0	0	0	0	0	0	0	0	0	0	0	2	0	2	0	0	0	0	0	0	0	0	0	0	0	0	0	0	2	0
ENSBTAG00000049281	18	16	12	53	44	64	20	66	133	100	66	8	61	10	64	12	29	90	67	24	101	16	99	23	28	32	6	18	11	1	7	14	25	21	19	20	29
ENSBTAG00000047590	0	3	0	2	1	1	0	0	0	4	8	0	2	0	2	0	0	1	0	1	2	0	0	0	0	0	0	0	0	0	0	0	0	2	0	0	0
ENSBTAG00000010394	0	4	21	4	4	6	0	1	398	226	363	41	236	0	6	0	0	0	6	8	26	3	17	40	53	21	10	44	43	9	36	61	66	45	44	27	42
ENSBTAG00000032217	138	70	71	233	160	299	38	210	224	120	123	34	80	0	13	5	4	10	13	1	14	7	19	27	24	25	3	15	12	3	16	7	15	26	25	30	20
ENSBTAG00000010397	147	140	171	79	132	67	14	57	516	318	259	88	417	6	32	6	2	20	22	0	23	3	24	339	357	310	64	255	93	15	82	107	100	428	518	438	386
ENSBTAG00000006552	87	32	57	48	45	29	7	30	95	62	41	6	54	2	9	7	5	8	246	19	118	13	95	7622	8442	5175	1593	5990	120	6	86	101	53	2223	2392	2101	1981
ENSBTAG00000006548	2662	1366	782	496	679	726	89	499	6665	4600	4123	698	3171	80	472	93	106	427	1775	295	1563	284	1438	700	938	919	170	587	1174	164	1032	1270	980	610	722	598	495
ENSBTAG00000012797	322	252	231	576	602	694	95	489	907	443	460	58	423	114	806	235	163	586	283	55	238	33	226	630	504	395	80	336	425	46	402	428	325	541	556	491	447
ENSBTAG00000000290	666	486	476	109	174	127	26	88	1924	913	815	166	698	22	77	29	13	60	424	81	411	36	425	731	746	418	190	487	623	110	602	696	483	1039	992	771	741
ENSBTAG00000054214	0	0	0	0	0	0	0	0	0	0	0	0	0	0	0	0	0	0	0	0	0	0	0	0	0	0	0	0	0	0	0	0	0	0	0	0	0
ENSBTAG00000045138	0	0	0	0	0	0	0	0	0	0	0	0	0	0	0	0	0	0	0	0	0	0	0	0	0	0	0	0	0	0	0	0	0	0	0	0	0
ENSBTAG00000052565	0	0	0	0	0	0	0	0	0	0	0	0	0	0	2	0	0	0	0	0	0	0	0	0	0	0	0	0	0	0	0	3	2	0	0	0	0
ENSBTAG00000052804	0	0	0	0	0	0	0	0	0	0	0	0	0	0	0	0	0	0	0	0	0	0	0	0	0	0	0	0	0	0	0	0	0	0	0	0	0
ENSBTAG00000049095	3	6	6	0	0	4	0	0	5	9	0	0	1	0	0	0	0	0	0	0	0	0	0	0	0	0	0	0	0	0	0	0	2	0	0	0	2
ENSBTAG00000052407	0	0	0	0	0	0	0	0	0	0	0	0	0	0	0	0	0	0	0	0	0	0	0	0	0	0	0	0	0	0	0	0	0	0	0	0	0
ENSBTAG00000051228	0	0	0	0	0	0	0	0	0	0	0	0	0	0	0	0	0	0	0	0	0	0	0	0	0	0	0	0	0	0	0	0	0	0	0	0	0
ENSBTAG00000052485	0	0	0	0	0	0	0	0	0	0	0	0	0	0	0	0	0	0	0	0	0	0	0	0	0	0	0	0	0	0	0	0	0	0	0	0	0
ENSBTAG00000023513	810	816	460	4760	4199	7078	904	4439	3375	1693	1855	327	1402	224	1293	404	376	1495	1280	103	767	226	1081	412	458	542	89	300	995	135	820	1349	756	468	547	550	501
ENSBTAG00000016457	2055	1915	1728	2680	2325	3488	603	2744	3917	2084	2215	435	1678	1480	8939	2595	2037	8041	1344	201	1104	183	1070	2188	2493	2389	453	1657	1977	217	1546	2353	1351	1981	2071	1884	1833
ENSBTAG00000001969	2	12	13	5	8	14	0	1	48	35	19	8	30	1	7	0	0	4	2	0	0	4	2	238	224	222	56	222	14	0	13	9	8	24	19	22	22
ENSBTAG00000001968	456	624	590	203	239	230	52	183	1270	589	534	178	782	50	288	125	73	263	441	65	366	80	312	652	804	988	120	397	794	128	623	599	443	1712	1051	1083	886
ENSBTAG00000013219	2	2	4	22	18	24	0	18	7	4	14	2	4	2	6	1	0	10	0	0	0	0	0	0	2	1	0	2	2	0	0	0	0	0	0	2	4
ENSBTAG00000005946	93	44	53	854	1119	1075	164	725	196	83	109	32	113	282	1619	471	398	1561	27	3	15	2	17	119	112	80	43	97	28	0	19	30	13	74	108	71	54
ENSBTAG00000002463	1428	1211	653	11564	8778	14848	2178	10625	7371	2998	3495	744	3064	422	2533	791	650	2575	1165	116	711	184	789	810	765	1308	152	487	2676	397	2414	4142	2240	1054	1040	1265	1224
ENSBTAG00000048473	0	0	0	0	0	1	0	0	0	0	0	0	0	0	0	0	0	0	0	0	0	0	0	0	0	0	0	0	0	0	0	0	0	1	1	0	0
ENSBTAG00000002462	418	562	409	1568	1407	2112	337	1590	1400	703	656	112	641	71	396	143	122	471	584	53	312	65	400	426	467	650	97	364	828	106	719	914	589	842	779	810	744
ENSBTAG00000002460	386	299	328	400	372	540	64	317	1030	661	429	131	540	27	191	42	29	158	642	46	351	50	380	694	815	742	128	447	594	80	427	688	439	634	709	617	568
ENSBTAG00000002767	2741	1501	1562	331	485	223	25	181	1329	739	528	105	349	14	100	29	18	100	399	41	305	32	223	1579	1881	855	275	958	591	27	296	377	205	1348	1884	1288	1300
ENSBTAG00000010485	1148	964	893	895	959	931	158	776	2624	1207	1180	267	1218	207	1065	342	287	1164	1309	156	861	193	1078	1474	1329	1350	236	977	1638	170	1557	1964	1293	1149	1012	939	807
ENSBTAG00000050978	8	8	11	0	0	1	0	0	11	7	8	0	12	0	2	3	2	2	0	0	6	2	4	8	0	10	2	6	5	6	9	24	8	10	20	11	10
ENSBTAG00000037393	237	269	231	282	328	286	32	224	372	186	142	51	194	31	230	60	34	98	232	18	140	27	171	292	321	339	51	194	333	58	242	318	194	341	291	278	249
ENSBTAG00000009235	50	65	44	59	76	82	5	40	82	62	39	12	66	3	27	6	3	16	55	6	25	10	45	92	94	72	16	80	64	10	44	62	61	36	39	63	57
ENSBTAG00000009232	629	476	534	213	356	221	55	176	1089	503	542	124	447	51	240	73	46	194	374	37	269	34	244	1269	1477	1069	282	927	1098	130	890	874	574	1242	1392	960	981
ENSBTAG00000043271	0	0	0	0	0	0	0	0	0	0	0	0	0	0	0	2	0	0	0	0	0	0	0	0	0	0	0	0	2	0	0	0	0	2	2	2	0
ENSBTAG00000054655	0	1	0	0	0	0	0	0	0	0	0	0	0	0	0	0	0	0	0	0	0	0	0	0	0	0	0	0	0	0	0	10	0	3	3	2	0
ENSBTAG00000012463	224	92	145	95	120	79	20	95	347	263	173	31	124	8	47	31	10	73	69	14	113	6	69	295	275	112	64	222	176	26	121	148	126	364	507	246	271
ENSBTAG00000011377	46	34	9	204	160	120	40	153	171	270	140	24	146	0	0	0	0	0	0	0	0	0	2	0	11	4	0	0	0	0	0	0	0	0	0	0	2
ENSBTAG00000050181	8	4	7	2	1	4	0	0	7	7	0	0	1	0	0	0	0	2	41	4	22	4	29	26	32	45	4	23	12	2	10	14	11	6	25	4	1
ENSBTAG00000054907	0	0	4	0	1	1	0	0	1	0	0	0	0	0	0	0	0	2	57	7	73	7	45	48	48	41	5	24	1	3	9	12	8	1	0	0	0
ENSBTAG00000035144	267	185	168	85	182	115	15	63	271	223	107	23	91	33	218	20	19	76	488	80	412	65	452	524	622	665	100	379	95	16	122	220	149	186	215	149	67
ENSBTAG00000054315	1900	1395	1409	1820	2031	1518	205	1057	2703	2415	1055	214	1008	256	1458	186	224	928	1890	258	1768	175	1721	1545	1677	1498	365	1107	1058	124	757	958	815	817	1087	616	593
ENSBTAG00000052803	275	276	336	515	581	444	72	269	257	272	154	26	124	268	1500	283	376	1369	116	10	78	14	109	369	350	390	66	192	166	19	166	105	122	164	242	111	117
ENSBTAG00000048417	0	0	1	2	5	3	0	12	0	9	3	0	0	0	0	2	0	3	0	0	0	0	4	4	2	7	0	3	4	0	0	1	0	0	1	0	3
ENSBTAG00000045258	0	0	0	0	0	0	0	0	0	0	0	0	0	0	0	0	0	0	0	0	0	0	0	0	0	0	0	0	0	0	0	0	0	0	0	0	0
ENSBTAG00000050198	0	0	0	0	0	0	0	0	0	0	1	0	0	0	0	0	0	0	0	0	0	0	0	5	6	17	5	6	3	0	0	0	0	4	0	0	2
ENSBTAG00000036933	0	0	0	0	0	0	0	0	0	0	0	0	0	0	0	0	0	0	0	0	0	0	0	0	0	0	0	0	0	0	0	0	0	0	0	0	0
ENSBTAG00000021910	950	731	769	313	473	324	51	233	1969	852	1016	172	708	59	246	104	42	233	680	113	567	62	426	1812	1814	1119	326	1181	2136	250	1469	2256	1315	1906	2012	1761	1744
ENSBTAG00000054926	170	284	200	64	125	107	10	59	528	246	265	73	299	8	101	21	15	42	231	12	115	23	112	295	278	522	59	272	298	49	256	389	238	435	379	417	467
ENSBTAG00000048493	116	130	95	18	22	34	4	44	217	133	144	40	140	0	14	2	2	0	67	25	91	15	82	41	65	32	17	40	18	2	6	4	2	26	33	32	25
ENSBTAG00000054712	0	0	0	0	0	0	0	0	0	0	0	0	0	0	0	0	0	0	0	0	0	0	0	0	0	0	0	0	0	0	0	0	0	0	0	0	0
ENSBTAG00000044913	0	0	0	0	0	0	0	0	0	0	0	0	0	0	0	0	0	0	2	0	0	0	0	0	0	0	0	0	0	0	0	0	0	0	0	0	0
ENSBTAG00000043126	0	0	0	0	0	0	0	0	0	0	0	0	0	0	0	0	0	0	0	0	0	0	0	0	0	0	0	0	0	0	0	0	0	0	0	0	0
ENSBTAG00000044291	0	1	5	0	0	0	0	0	3	1	2	0	0	0	1	0	0	1	0	0	0	0	0	2	0	0	0	0	0	0	0	0	0	0	0	1	3
ENSBTAG00000055042	10	18	10	5	3	4	2	5	2	3	2	0	0	0	1	3	0	4	0	0	0	0	0	3	0	0	0	2	2	0	0	0	0	0	6	2	2
ENSBTAG00000029452	0	0	0	0	0	0	0	0	0	0	0	0	0	0	0	0	0	0	0	0	0	0	0	0	0	0	0	0	0	0	0	0	0	0	0	0	0
ENSBTAG00000031891	81	17	7	2	6	2	0	8	16	39	49	0	0	0	4	0	0	0	0	1	5	2	0	4	12	2	0	2	10	0	4	2	1	4	16	4	2
ENSBTAG00000046279	0	0	0	0	0	0	0	0	0	0	0	0	0	0	0	0	0	0	0	0	0	0	0	0	0	0	0	0	0	0	0	0	0	0	0	0	0
ENSBTAG00000012401	2	3	1	0	3	1	0	0	4	5	5	0	1	0	3	0	0	0	3	0	3	0	0	4	2	0	0	1	4	1	8	5	12	3	2	0	0
ENSBTAG00000031802	5	33	6	4	15	16	0	2	223	162	215	25	136	0	5	0	0	4	0	0	0	0	0	0	10	29	0	2	4	0	2	6	6	5	4	17	2
ENSBTAG00000023814	281	103	96	51	76	32	2	12	256	150	48	10	20	2	16	8	2	6	83	20	57	6	30	366	263	130	38	110	341	76	456	401	217	284	338	276	247
ENSBTAG00000020073	477	394	403	422	534	547	43	342	1897	1002	820	182	770	35	148	70	18	118	187	11	54	14	71	701	967	1151	292	932	357	60	296	395	188	752	798	700	564
ENSBTAG00000018994	1220	851	1089	506	816	730	121	609	337	159	142	45	180	11	94	56	22	110	431	45	210	48	235	1832	2554	1997	827	2940	331	59	251	388	165	366	498	477	527
ENSBTAG00000010874	2	2	10	2	0	0	0	0	0	0	0	0	4	0	0	0	2	0	2	0	0	0	0	11	16	6	0	10	5	0	4	7	0	21	26	26	14
ENSBTAG00000019376	4196	3456	3573	838	1251	932	131	577	3441	1616	1601	345	1459	41	292	111	76	241	1914	181	1063	200	1175	4439	4260	2530	689	2397	1116	57	608	934	460	2487	3144	2684	3050
ENSBTAG00000050699	2	15	10	6	18	16	0	7	49	18	14	0	12	0	5	3	5	8	9	0	10	2	4	10	16	16	0	8	19	5	10	22	20	16	16	19	9
ENSBTAG00000006174	0	0	0	0	1	0	0	2	0	0	0	0	2	0	0	0	0	0	0	0	0	0	0	43	40	14	11	59	0	0	0	4	0	0	0	0	0
ENSBTAG00000017490	681	909	792	483	482	438	79	361	568	244	173	41	171	8	33	26	7	36	592	125	634	91	572	3310	2974	1335	641	2132	3045	346	2321	3982	2801	430	647	465	523
ENSBTAG00000049814	11	2	22	18	26	19	5	18	47	34	53	2	13	4	24	3	10	17	23	0	14	6	17	172	156	44	22	80	100	12	79	89	60	126	127	70	96
ENSBTAG00000051079	126	171	131	57	82	93	3	68	85	19	39	12	33	2	10	4	1	15	41	3	28	2	26	148	203	202	30	152	123	12	86	147	67	149	193	244	239
ENSBTAG00000011742	53	61	46	72	81	70	8	69	137	91	101	12	46	20	104	39	14	55	85	12	29	5	49	458	341	210	68	254	246	43	186	219	134	380	296	249	262
ENSBTAG00000050747	0	0	0	0	0	0	0	0	0	0	0	2	0	0	2	0	1	1	0	1	0	0	0	10	3	2	0	7	2	0	0	1	2	3	9	12	2
ENSBTAG00000005386	2	2	0	2	4	0	0	0	2344	1292	788	232	903	0	4	0	0	0	4089	611	3669	464	3817	2	2	0	0	0	0	0	4	2	0	0	2	0	1
ENSBTAG00000010550	58	38	57	16	23	22	4	14	107	42	62	6	36	2	4	4	0	6	22	2	7	0	10	40	67	42	11	30	29	4	8	18	13	90	73	113	78
ENSBTAG00000007394	2308	2369	1608	965	829	854	126	617	994	483	669	110	431	63	602	128	114	557	798	70	368	117	372	1385	1220	2081	194	772	3102	390	2715	4980	2435	3996	3926	4492	3888
ENSBTAG00000052203	0	0	0	0	0	0	0	0	0	0	0	0	0	0	0	0	0	0	0	0	0	0	0	0	0	0	0	0	0	0	0	0	0	0	0	0	0
ENSBTAG00000016323	0	0	2	0	2	0	0	0	1	0	0	0	0	0	0	0	0	0	0	0	0	0	0	0	0	2	0	2	0	0	0	1	0	0	0	2	4
ENSBTAG00000019060	94	182	193	18	32	36	0	4	110	89	26	8	17	2	22	4	7	32	48	11	68	6	46	579	448	257	72	190	193	21	106	29	40	6	16	2	7
ENSBTAG00000004154	331	426	333	142	160	117	27	99	606	271	194	52	210	35	247	37	20	83	235	24	156	14	127	1054	1042	600	156	459	237	51	270	306	181	793	901	811	612
ENSBTAG00000049676	55	51	53	14	32	24	0	3	87	42	40	4	44	7	42	6	9	31	31	8	21	2	28	132	194	71	15	74	58	8	54	72	33	91	115	94	82
ENSBTAG00000001403	318	276	301	105	135	85	14	63	1349	609	589	117	644	16	61	26	13	66	209	25	179	23	120	779	831	653	162	540	2320	216	1515	1735	1388	309	353	306	296
ENSBTAG00000043872	0	0	0	0	0	0	0	0	0	0	0	0	0	0	0	0	0	0	0	0	0	0	0	0	0	0	0	0	0	0	0	0	0	0	0	0	0
ENSBTAG00000013938	276	188	322	88	149	97	9	60	489	231	239	46	190	13	69	30	12	76	154	13	187	21	137	641	756	235	157	499	343	24	224	283	162	552	615	326	335
ENSBTAG00000045411	0	0	0	0	0	0	0	1	0	0	0	0	0	0	0	0	0	0	0	0	0	0	0	0	0	0	0	0	0	0	0	0	0	0	0	0	0
ENSBTAG00000048011	3	14	41	25	12	13	8	27	108	72	39	14	74	1	6	0	0	2	24	4	2	10	20	133	114	154	33	109	134	15	98	102	73	47	15	24	63
ENSBTAG00000042535	0	0	0	0	0	0	0	0	0	0	0	0	0	0	0	0	0	0	0	0	0	0	0	0	0	0	0	0	0	0	0	0	0	0	0	0	0
ENSBTAG00000045991	2	2	1	6	0	3	0	2	2	2	2	0	2	0	5	3	0	0	1	1	0	0	3	3	1	5	0	0	4	0	2	6	4	2	4	8	3
ENSBTAG00000039442	5365	8495	7086	3026	3409	4107	547	2729	16860	8733	9359	2199	9573	188	1502	452	358	1442	10354	1078	6783	2037	7425	9148	8482	15512	1917	6793	4963	502	3097	5777	3515	5761	5069	5629	5608
ENSBTAG00000018228	0	0	0	0	0	0	0	0	0	0	0	0	0	0	0	0	0	0	0	0	0	0	0	0	0	0	0	0	0	0	0	0	0	0	0	0	0
ENSBTAG00000006415	0	0	0	2	0	0	0	0	2	0	0	0	0	0	0	0	0	0	0	0	0	0	0	0	4	2	2	2	0	0	0	0	0	0	2	0	0
ENSBTAG00000006409	62	51	50	51	45	55	8	27	86	45	11	3	30	2	15	2	0	0	22	2	6	0	23	75	76	85	8	44	44	6	22	48	15	34	46	34	36
ENSBTAG00000013142	603	559	502	237	262	265	35	204	1154	502	527	116	533	57	295	95	68	287	377	55	325	52	249	678	750	667	133	510	508	61	434	552	323	891	878	796	755
ENSBTAG00000013141	60	63	64	42	50	32	7	28	89	64	70	12	52	18	113	27	27	60	54	3	22	2	35	44	105	128	25	79	93	11	53	79	53	43	62	105	66
ENSBTAG00000043157	61	44	37	3	14	4	0	10	6	6	14	3	8	0	6	0	0	6	27	0	4	4	0	33	51	124	4	22	10	9	37	8	26	60	34	72	40
ENSBTAG00000054767	0	0	0	0	0	0	0	0	0	0	0	0	0	0	0	0	0	0	0	0	0	0	0	0	0	0	0	0	0	0	0	0	0	0	0	0	0
ENSBTAG00000053891	13	26	14	4	9	11	1	5	61	53	50	8	38	0	1	1	0	2	0	0	0	0	0	87	84	55	5	61	64	11	40	73	33	3	0	6	8
ENSBTAG00000047144	12	10	16	7	19	13	0	10	46	27	41	11	10	0	1	2	0	0	0	0	0	0	0	53	31	22	5	46	43	4	19	35	33	4	4	2	4
ENSBTAG00000005871	498	353	455	240	399	289	40	238	1239	739	828	150	532	7	42	14	8	42	37	4	27	4	50	1053	1171	922	288	1004	1337	114	883	1086	602	113	109	166	174
ENSBTAG00000054693	0	1	4	0	2	0	0	4	2	0	0	0	0	0	0	0	0	0	0	0	0	0	0	23	86	30	11	29	0	0	0	0	0	0	4	1	0
ENSBTAG00000030029	0	0	0	0	0	0	0	0	0	0	0	0	0	0	0	0	0	0	0	0	0	0	0	0	0	0	0	0	0	0	0	0	0	0	0	0	0
ENSBTAG00000018727	3544	3487	3806	2333	2886	2595	390	1833	14892	8051	8352	1642	6958	88	440	99	81	283	8494	1332	7978	1261	8362	4085	4486	2658	829	2588	2235	243	1201	1708	1112	1646	2227	1915	1682
ENSBTAG00000031704	0	0	0	0	0	0	0	0	0	0	0	0	0	0	0	0	0	0	0	0	0	0	0	0	0	0	0	0	0	0	0	0	0	0	0	0	1
ENSBTAG00000012708	36	55	83	15	10	18	4	28	2501	1215	1368	247	1141	0	9	0	0	16	19	3	6	4	15	109	120	156	22	100	321	41	265	434	200	152	176	183	177
ENSBTAG00000031709	843	915	868	590	608	684	97	513	2053	979	811	180	782	27	202	80	50	238	672	72	407	96	502	971	1010	1356	218	725	1472	201	1200	1978	1421	1338	1281	1286	1231
ENSBTAG00000031618	1	2	5	0	0	0	0	0	0	0	0	0	0	0	0	0	0	0	0	0	0	0	0	36	50	22	2	30	1	0	0	0	2	0	0	0	1
ENSBTAG00000011423	0	4	2	0	0	0	0	0	0	0	0	0	0	0	0	0	0	0	0	0	0	0	0	9	2	10	2	3	0	0	0	0	0	0	0	0	0
ENSBTAG00000035710	0	0	0	0	0	0	0	0	6	0	1	2	2	0	0	0	0	0	0	0	0	0	0	55	49	37	16	40	0	0	0	0	0	0	0	0	0
ENSBTAG00000043293	0	0	0	0	0	0	0	0	0	0	0	0	0	0	0	0	0	0	0	0	0	0	0	0	0	0	0	0	0	0	0	0	0	0	0	0	0
ENSBTAG00000011139	995	960	942	93	133	86	12	65	284	97	79	7	40	7	106	15	2	49	55	2	32	12	64	253	161	250	58	157	422	18	102	197	152	148	173	80	65
ENSBTAG00000053582	0	2	0	0	0	0	0	0	0	0	0	0	0	0	0	0	0	0	0	0	0	0	0	0	0	1	0	0	3	0	0	0	0	1	0	0	0
ENSBTAG00000044337	0	0	0	0	0	0	0	0	0	0	0	0	0	0	0	0	0	0	0	0	0	0	0	0	0	0	0	0	0	0	0	0	0	0	0	0	0
ENSBTAG00000017180	0	0	2	0	0	0	0	0	0	0	0	0	0	0	5	0	0	0	0	0	0	0	0	0	0	0	0	0	1	0	0	0	5	0	0	0	0
ENSBTAG00000055191	0	0	0	0	0	0	0	0	0	0	0	0	0	0	0	0	0	0	0	0	0	0	0	0	0	0	0	0	0	0	0	0	0	0	0	0	0
ENSBTAG00000006975	0	0	0	0	0	2	0	0	0	0	6	0	0	0	0	0	0	0	2	0	0	0	0	2	0	0	0	1	0	0	0	1	0	0	1	3	0
ENSBTAG00000044737	0	0	0	0	0	0	0	0	0	0	0	0	0	0	0	0	0	0	0	0	0	0	0	0	0	0	0	0	0	0	0	0	0	0	0	0	0
ENSBTAG00000048551	0	2	0	0	0	0	0	0	0	0	0	0	0	0	0	0	0	0	2	0	0	0	0	0	0	2	0	0	0	0	0	0	0	0	0	0	0
ENSBTAG00000018312	538	302	305	277	238	286	43	192	402	318	248	34	169	17	110	21	42	145	560	46	281	46	292	680	771	885	124	417	678	101	608	670	569	812	1190	721	863
ENSBTAG00000043587	0	0	0	0	0	0	0	0	0	0	0	0	0	0	0	0	0	0	0	0	0	0	0	0	0	0	0	0	0	0	0	0	0	0	0	0	0
ENSBTAG00000027213	39	119	57	48	35	127	6	58	50	37	56	3	58	2	19	4	7	21	55	4	14	5	28	41	41	88	12	43	111	11	89	283	178	71	50	107	96
ENSBTAG00000025847	0	0	0	0	0	0	0	0	0	0	0	0	0	0	0	0	0	0	0	0	0	0	0	0	0	0	0	0	0	0	0	0	0	0	0	0	0
ENSBTAG00000043595	0	0	0	0	0	0	0	0	0	0	0	0	0	0	0	0	0	0	0	0	0	0	0	0	0	0	0	0	0	0	0	0	0	0	0	0	0
ENSBTAG00000018489	0	0	2	0	0	0	0	0	1	0	0	0	2	0	0	0	0	0	2	0	0	0	0	2	0	2	0	0	22	4	10	23	13	2	0	0	0
ENSBTAG00000049813	0	0	0	0	0	0	0	0	0	0	0	0	0	0	0	0	0	0	0	0	0	0	0	0	0	0	0	0	0	0	0	0	0	0	0	0	0
ENSBTAG00000049223	9	4	17	54	138	43	16	22	125	84	114	20	98	2	4	0	2	2	1268	81	504	166	619	398	302	264	60	250	5712	942	5816	14800	9488	10	6	12	5
ENSBTAG00000016228	667	757	656	492	546	686	116	453	1631	762	732	149	749	84	595	191	150	673	693	55	443	87	403	728	746	1120	156	560	1339	230	1379	1998	1188	1023	880	921	871
ENSBTAG00000046104	1292	1057	1254	114	163	114	21	104	57	19	30	3	22	9	117	46	15	89	2	2	0	0	0	485	419	365	95	297	58	0	6	30	24	2	4	5	6
ENSBTAG00000001274	427	132	212	77	118	92	17	74	229	106	115	26	94	49	482	192	106	395	199	38	210	40	166	177	133	42	21	72	100	10	71	91	119	27	24	16	25
ENSBTAG00000055054	2	0	1	0	0	0	0	0	0	0	0	0	0	0	0	0	0	0	0	1	2	0	0	0	0	0	0	0	0	0	0	2	0	0	0	0	0
ENSBTAG00000049943	0	0	0	0	0	0	0	0	0	0	0	0	0	0	0	0	0	0	0	0	0	0	0	0	0	0	0	0	0	0	0	0	0	0	0	0	0
ENSBTAG00000049656	259	96	113	34	61	33	1	25	46	35	11	4	15	0	17	1	2	6	14	4	6	0	2	125	175	145	29	103	49	3	40	17	13	17	22	6	33
ENSBTAG00000017322	0	0	0	0	0	0	0	0	0	0	0	0	0	0	0	0	0	0	0	0	0	0	0	0	2	0	0	0	0	0	5	0	0	1	0	0	2
ENSBTAG00000017416	920	761	779	720	727	812	159	802	1358	711	765	157	671	286	1733	447	386	1570	702	86	414	74	440	1272	1262	985	298	873	893	144	842	1338	905	1026	1112	1019	1107
ENSBTAG00000045275	0	4	2	0	0	2	0	0	4	0	2	0	6	0	1	0	0	0	0	0	0	0	0	1	0	8	0	0	2	0	0	2	2	4	0	49	16
ENSBTAG00000008078	66	24	44	21	39	30	6	14	86	67	58	5	43	4	2	0	0	6	44	6	38	0	30	129	118	76	12	64	56	9	66	69	63	144	86	114	120
ENSBTAG00000005862	836	513	394	314	354	253	33	113	1217	573	359	90	338	73	380	74	26	193	498	56	349	33	162	1633	1392	1142	164	642	994	202	1009	879	524	2147	2002	1575	1649
ENSBTAG00000029916	0	0	0	0	0	0	0	0	0	0	0	0	0	0	0	0	0	0	0	0	0	0	0	0	0	0	0	0	0	0	0	0	0	2	0	0	0
ENSBTAG00000029929	0	0	0	0	0	0	0	0	0	0	0	0	0	0	0	0	0	0	0	0	0	0	0	0	0	0	0	0	0	0	0	0	0	0	0	0	0
ENSBTAG00000031572	241	188	171	85	128	76	21	93	856	492	393	65	326	9	54	12	12	72	95	24	78	5	63	326	298	278	62	202	194	30	134	170	96	282	276	194	212
ENSBTAG00000047247	8	5	5	0	5	2	0	0	0	0	2	0	1	0	0	0	0	0	1	0	0	0	0	9	12	25	6	18	3	0	0	4	6	0	4	2	2
ENSBTAG00000052570	771	1332	1072	338	307	310	57	224	664	355	327	66	394	28	187	39	31	128	473	29	152	42	264	1421	1168	1259	226	796	505	45	293	534	201	1569	1429	1497	1275
ENSBTAG00000015150	6	3	2	0	0	6	2	0	11	12	2	4	8	2	4	0	2	0	0	0	2	2	0	6	8	4	0	2	0	0	5	12	2	27	34	41	35
ENSBTAG00000049210	0	0	4	0	0	0	0	0	4	0	2	0	5	0	0	0	0	0	0	0	0	0	0	0	0	0	0	0	0	0	0	0	0	8	3	2	7
ENSBTAG00000014960	400	416	305	2636	2460	3008	581	2490	1157	804	560	83	373	740	4250	1014	1109	4208	105	13	46	2	58	1946	1849	2170	366	1195	180	15	113	199	178	346	361	312	200
ENSBTAG00000054919	0	0	0	0	0	0	0	0	8	0	1	1	1	0	0	0	0	0	0	0	0	0	0	1	0	3	0	2	0	0	0	0	0	2	0	1	2
ENSBTAG00000003135	0	0	0	0	0	0	0	0	0	1	0	0	0	0	0	0	0	0	0	0	0	0	0	0	0	0	0	0	0	0	0	0	0	0	0	0	0
ENSBTAG00000038395	0	0	0	0	0	0	0	0	0	0	0	0	0	0	0	0	0	0	0	0	0	0	0	2	4	0	0	0	0	0	0	0	0	0	0	0	0
ENSBTAG00000009263	1215	1386	1248	578	566	546	87	430	6696	3634	3901	790	3407	89	382	92	81	420	3833	564	3145	427	2635	1599	1692	1866	369	1226	1238	158	904	1189	906	1135	1313	1318	1132
ENSBTAG00000014713	653	753	661	414	475	521	56	238	690	689	712	71	282	4	46	12	13	55	1346	150	797	189	1939	1961	1776	2120	412	1407	861	77	313	641	318	1488	1014	1258	1233
ENSBTAG00000027795	1109	715	516	1446	1215	2051	277	1330	3034	1715	1965	351	1437	80	496	176	118	577	1156	129	798	210	918	543	543	831	114	428	1124	189	1003	1474	776	551	558	588	523
ENSBTAG00000009336	787	663	552	508	542	289	35	171	269	128	132	21	91	14	51	15	12	18	110	9	48	16	29	995	892	622	91	302	351	19	213	281	156	471	376	559	328
ENSBTAG00000004126	183	375	274	5259	4660	5846	1399	6710	378	212	238	35	184	897	5618	1551	1689	6174	14	2	30	4	21	596	494	489	122	438	175	8	91	241	143	92	84	58	80
ENSBTAG00000031561	747	744	745	520	424	601	91	446	949	605	431	97	432	40	256	83	65	290	658	111	447	74	615	501	463	420	88	412	837	106	581	781	704	572	652	536	535
ENSBTAG00000005230	404	490	526	38	17	39	2	36	8	2	4	0	2	5	22	6	5	27	10	0	3	0	10	24	15	8	0	14	17	0	16	15	10	0	0	6	0
ENSBTAG00000045446	0	0	0	0	0	0	0	0	0	0	0	0	0	0	0	0	0	0	0	0	0	0	0	0	0	0	0	0	0	0	0	0	0	0	0	0	0
ENSBTAG00000024643	13	13	15	6	0	5	0	10	1268	760	808	130	547	0	0	0	0	6	151	16	58	14	146	552	471	433	143	495	9	2	9	9	6	4	0	2	4
ENSBTAG00000009012	264	99	92	16	20	16	2	5	89	36	22	6	31	3	23	6	4	6	61	3	13	0	6	328	162	116	26	81	82	10	72	161	76	27	26	11	14
ENSBTAG00000052714	0	0	4	0	0	0	0	0	0	0	0	0	0	0	0	0	0	0	0	0	0	0	0	0	0	0	0	1	0	0	0	0	0	0	0	0	0
ENSBTAG00000054426	0	0	0	0	0	0	0	0	0	0	3	0	4	0	0	0	0	0	0	0	0	0	0	0	0	0	0	0	0	0	0	0	0	0	0	0	0
ENSBTAG00000003851	1233	1238	1415	537	527	461	66	331	1485	844	644	139	665	144	824	127	93	342	786	73	490	84	365	1619	1718	2460	350	1167	1092	109	747	784	532	2711	2188	1669	1449
ENSBTAG00000018009	17	4	6	11	22	19	2	22	20	27	10	4	12	1	0	4	2	2	29	4	31	2	12	61	157	101	18	55	15	2	20	21	6	177	385	287	200
ENSBTAG00000050129	0	1	0	8	7	13	1	6	10	14	11	2	5	0	0	0	0	0	3	0	0	0	0	9	5	0	2	4	4	0	6	0	2	9	5	3	2
ENSBTAG00000012120	1510	1466	1183	839	882	613	114	445	1483	634	490	105	514	93	735	70	41	190	820	56	441	53	320	1503	2006	1751	235	1030	1381	119	1046	1507	1174	2843	3258	1609	1840
ENSBTAG00000018471	2508	3400	2943	2053	1997	2555	339	1670	3360	1947	2027	437	1815	190	1229	374	329	1267	2267	207	1294	405	1640	2120	2141	2672	410	1449	2495	368	2048	3123	1941	1989	2465	2599	2314
ENSBTAG00000018465	37	73	34	81	120	99	8	67	615	391	369	81	400	6	18	5	5	9	14	2	14	0	4	11	30	8	10	11	138	6	64	99	44	94	96	75	67
ENSBTAG00000044278	0	0	0	0	0	0	0	0	0	0	0	0	0	0	0	0	0	0	0	0	0	0	0	0	0	0	0	0	0	0	0	0	0	0	0	0	0
ENSBTAG00000013013	828	935	844	1187	1132	1313	210	1227	2587	1351	1287	266	1251	141	1066	274	247	897	835	86	543	100	578	1115	1199	1450	189	713	987	129	813	965	751	1087	1407	1374	1120
ENSBTAG00000014318	626	654	519	400	396	353	73	286	2571	1318	1236	304	1242	55	259	91	48	314	1711	117	879	206	1547	1203	1011	1196	302	834	886	111	682	996	701	967	1059	868	829
ENSBTAG00000005203	128	93	100	112	96	91	13	63	280	157	114	28	120	21	37	13	16	52	28	7	22	7	35	59	101	109	25	53	55	3	53	80	36	50	40	75	50
ENSBTAG00000008307	7	0	6	0	2	0	0	0	821	414	490	112	448	0	4	0	0	0	44	6	26	2	30	246	278	104	73	247	362	20	138	315	380	8	2	0	0
ENSBTAG00000042550	0	0	0	0	0	0	0	0	0	0	0	0	0	0	0	0	0	0	0	0	0	0	0	0	0	0	0	0	0	0	0	0	0	0	0	0	0
ENSBTAG00000054182	0	0	0	467	752	532	88	452	389	200	218	50	206	905	5265	1330	693	2685	2	0	0	0	2	0	0	0	0	0	0	0	0	0	0	4	2	2	2
ENSBTAG00000044667	0	0	0	0	0	0	0	0	0	0	4	0	0	0	0	0	0	0	0	0	0	0	0	0	2	0	0	0	0	0	0	0	0	0	0	0	0
ENSBTAG00000002075	3421	711	275	197	100	55	10	79	42690	20021	20575	3994	16760	153	763	100	94	348	2	0	6	0	0	925	1455	1632	388	1220	1	0	2	12	12	217	298	78	138
ENSBTAG00000024623	2	2	4	12	5	29	6	26	20	4	8	2	10	1	2	0	0	7	2	1	6	2	4	9	0	5	1	6	13	2	2	3	6	2	2	4	0
ENSBTAG00000006147	0	0	0	0	0	0	0	0	0	0	0	0	0	0	0	0	0	0	0	0	0	0	0	0	0	0	0	0	0	0	0	0	0	0	0	0	0
ENSBTAG00000006142	677	582	526	318	377	343	60	308	1677	721	913	130	722	46	222	70	76	279	610	67	440	90	441	987	987	913	198	659	667	95	542	674	465	923	1004	889	770
ENSBTAG00000013439	134	87	95	73	90	60	10	32	93	90	94	21	79	4	20	2	0	6	372	67	351	56	498	2719	2737	2117	745	2389	77	8	71	77	72	498	1247	578	551
ENSBTAG00000046896	0	0	0	0	0	0	0	0	0	0	0	0	0	0	0	0	0	0	0	0	0	0	0	0	0	0	0	0	0	0	0	0	0	0	0	0	0
ENSBTAG00000047341	34	36	22	14	15	17	3	11	69	23	31	3	16	0	6	0	6	4	21	4	7	0	12	37	56	32	13	34	32	2	13	15	14	48	54	47	34
ENSBTAG00000048392	0	6	10	0	4	4	0	4	6	0	0	0	0	0	0	0	0	0	4	0	2	0	0	3	6	17	0	0	0	0	0	0	0	6	4	9	7
ENSBTAG00000055257	1510	2358	2019	408	539	489	65	308	978	630	415	102	428	51	211	55	42	152	1023	144	622	109	760	2404	2902	2574	545	1638	1365	166	935	1032	747	4146	4362	4130	3651
ENSBTAG00000046577	0	0	0	0	0	0	0	0	0	0	0	0	0	0	0	0	0	0	0	0	0	0	0	0	0	0	0	0	0	0	0	0	0	0	0	0	0
ENSBTAG00000001465	131	67	79	172	238	166	29	143	141	96	20	0	28	179	1057	186	307	1154	252	25	158	23	206	288	295	218	55	176	243	28	207	269	159	264	367	194	266
ENSBTAG00000033740	47	85	23	74	78	102	2	15	86	58	34	7	22	7	24	14	12	6	36	9	20	8	7	85	115	64	10	25	71	11	38	49	7	36	55	55	16
ENSBTAG00000004564	3659	3174	3414	1216	1606	1233	261	1134	2494	1255	1430	259	1288	521	3391	1350	891	3228	1592	159	944	187	1069	5117	4929	4011	1141	3839	2248	350	2360	3177	1991	6180	5941	5767	5496
ENSBTAG00000043899	0	0	0	0	0	0	0	0	0	0	0	0	0	0	0	0	0	0	0	0	0	0	0	0	0	0	0	0	0	0	0	0	0	0	0	0	0
ENSBTAG00000053581	264	319	303	70	57	68	10	40	257	131	82	14	102	0	14	8	2	19	317	25	152	36	175	281	701	654	123	413	179	17	123	271	137	1259	1733	1497	1801
ENSBTAG00000049884	0	0	0	0	0	0	0	0	0	0	1	0	0	0	0	0	0	0	0	0	0	0	0	0	0	0	0	0	0	0	0	0	0	0	0	0	0
ENSBTAG00000011569	8	0	1	2	2	0	0	1	4866	2260	2107	471	2007	0	0	0	0	2	7510	1003	6608	814	5596	2	2	2	0	2	2	0	0	6	0	0	1	1	2
ENSBTAG00000050308	20	5	3	0	0	0	0	0	0	0	0	0	2	0	0	0	0	0	31	8	30	6	45	6	13	0	1	4	0	0	0	0	0	0	0	0	0
ENSBTAG00000013378	0	0	0	0	0	0	0	0	0	0	0	0	0	0	0	0	0	0	0	0	0	0	0	0	0	0	0	0	0	0	0	0	0	0	0	0	0
ENSBTAG00000042814	0	0	0	0	0	0	0	0	0	0	0	0	0	0	0	0	0	0	0	0	0	0	0	0	0	0	0	0	0	0	0	0	0	0	0	0	0
ENSBTAG00000050232	0	0	0	0	0	0	0	0	0	0	0	0	0	0	0	0	0	0	0	0	0	0	0	0	0	0	0	0	0	0	0	0	0	0	0	0	0
ENSBTAG00000010385	0	0	0	0	0	0	0	0	0	0	0	0	0	0	0	0	0	0	0	0	0	0	0	0	0	0	0	0	0	0	0	0	0	0	0	0	0
ENSBTAG00000049521	0	0	0	0	0	0	0	0	0	0	0	0	0	0	0	0	0	0	0	0	0	0	0	0	0	0	0	0	0	0	0	0	0	0	0	0	0
ENSBTAG00000001728	1774	967	840	61	173	54	8	72	259	103	65	26	135	0	31	7	4	25	18	1	13	4	7	785	1416	489	138	502	853	63	315	282	181	183	110	115	137
ENSBTAG00000021703	54	19	45	12	13	24	2	18	266	186	149	22	105	2	6	5	6	8	48	1	26	1	36	108	86	47	22	79	39	8	13	22	17	339	434	359	397
ENSBTAG00000015837	162	105	110	16	36	39	4	6	27	26	14	2	4	0	4	0	0	4	20	2	13	6	6	106	91	100	17	38	15	0	4	1	8	206	146	228	158
ENSBTAG00000011192	44	70	73	8	5	10	0	2	6	15	0	3	7	0	8	0	0	0	50	3	20	5	24	224	256	253	50	220	1079	151	982	1289	1019	894	655	733	862
ENSBTAG00000020990	42	83	107	63	98	54	14	58	188	133	81	17	73	5	22	4	2	17	79	15	59	22	45	336	1094	439	87	226	23	0	4	0	2	203	226	222	136
ENSBTAG00000009848	28	26	42	22	28	10	0	24	43	18	27	1	17	0	7	2	0	2	65	2	21	2	25	35	80	91	9	51	80	6	47	26	38	1178	552	415	404
ENSBTAG00000054822	0	0	0	0	0	0	0	0	0	0	0	0	0	0	0	0	0	0	0	0	0	0	0	0	0	0	0	0	0	0	0	0	0	0	0	0	0
ENSBTAG00000011267	0	0	0	0	0	0	0	0	0	0	0	0	0	0	0	0	0	0	0	0	0	0	0	0	25	2	0	2	0	0	0	6	0	0	0	0	0
ENSBTAG00000023445	1722	1856	2463	1798	1811	1403	195	1048	10910	8476	5307	1248	5111	233	1768	194	262	1078	2340	312	1882	180	2412	3112	2632	2793	602	1908	3823	423	2827	3741	4316	1568	2062	1355	1353
ENSBTAG00000001331	2	0	0	0	0	0	0	2	0	0	0	0	2	0	0	0	0	0	0	0	0	0	0	3	12	6	2	6	2	0	0	0	0	1	1	3	1
ENSBTAG00000031435	3186	2517	2189	1392	1501	1385	183	976	6322	3378	3047	706	2869	136	810	254	216	797	2778	271	1753	462	1957	3148	3541	3494	654	2385	2937	343	1932	3380	2333	3173	3807	3663	3304
ENSBTAG00000009106	1997	1765	1548	1998	1780	2144	384	2071	3683	1912	1739	341	1684	263	1555	454	399	1328	1486	159	1090	227	1188	1762	1609	1960	328	1175	2695	314	2093	3544	2029	2132	1915	2110	1910
ENSBTAG00000042474	0	0	0	0	0	0	0	0	0	0	0	0	0	0	0	0	0	0	0	0	0	0	0	0	0	0	0	0	0	0	0	0	0	0	0	0	0
ENSBTAG00000009104	1924	1463	1486	846	780	791	119	528	3423	1920	1988	355	1641	61	341	86	82	289	2704	249	1381	273	1917	4721	5061	4566	1032	3611	3368	479	3268	4061	2943	5415	5597	5825	5473
ENSBTAG00000018402	2523	1993	1909	1343	1593	964	158	657	2840	1773	1139	236	929	224	1276	156	188	786	1017	125	655	80	647	4080	3479	2170	559	1766	2050	242	1551	2045	1580	1641	1643	1177	1073
ENSBTAG00000053963	1	2	2	6	2	0	0	3	0	1	0	1	2	0	3	0	0	1	0	0	0	0	0	5	0	0	2	1	0	0	0	0	1	1	0	3	0
ENSBTAG00000011150	1709	1458	1585	1246	1085	1426	253	1263	8829	4482	4891	1068	5099	375	2181	664	432	1667	129	12	106	23	146	2543	2794	3008	536	1938	373	34	205	434	439	655	733	655	615
ENSBTAG00000011147	1457	1747	1882	930	1138	1036	148	771	6882	3057	3170	617	2861	68	430	140	111	402	1916	226	1415	257	1473	2316	2476	2928	430	1578	1214	160	824	1138	853	2094	1805	2065	1766
ENSBTAG00000031346	6	5	2	4	2	4	0	0	54	15	52	8	32	0	2	0	0	0	0	0	0	2	0	13	34	18	3	36	2	0	0	0	0	20	11	20	28
ENSBTAG00000005068	472	468	421	305	307	308	45	186	1214	679	586	114	485	13	102	22	14	68	251	32	164	24	136	673	625	683	124	434	543	56	344	594	321	606	567	544	571
ENSBTAG00000007814	2274	2066	2401	1019	1399	893	125	517	3257	1809	1451	261	1046	57	206	64	45	297	254	24	120	37	150	3776	2850	1411	625	2154	1697	228	1172	1772	1001	429	663	448	444
ENSBTAG00000001893	0	0	2	14	12	0	0	2	100	59	100	13	54	0	0	0	0	0	11564	1412	8257	2001	10213	9	2	1	0	1	2	0	2	5	3	0	9	0	2
ENSBTAG00000015163	2103	2257	2105	1836	2352	1939	247	1215	4831	2758	1553	390	1768	78	361	92	48	245	686	53	383	87	319	4775	6473	5814	1110	3858	1919	257	1436	2543	1833	541	560	886	688
ENSBTAG00000019960	306	116	81	515	435	341	41	176	895	479	321	82	347	0	27	0	8	26	104	18	45	8	34	346	251	307	89	209	295	43	202	367	181	39	59	24	52
ENSBTAG00000012164	67	55	201	24	10	2	4	5	1921	992	426	190	599	2	8	4	0	4	37079	3928	23807	4158	32620	32	31	28	13	32	45	7	29	46	23	1765	3023	1864	1766
ENSBTAG00000002395	449	496	469	157	184	206	44	137	707	427	317	78	386	55	248	61	88	271	382	41	281	44	268	648	871	1093	240	717	255	27	168	229	125	1395	1406	1134	1116
ENSBTAG00000042551	0	0	0	0	0	0	0	0	0	0	0	0	0	0	0	0	0	0	0	0	0	0	0	0	0	0	0	0	0	0	0	0	0	0	0	0	0
ENSBTAG00000019704	1318	785	889	531	648	504	76	401	3643	2116	2054	420	1811	17	135	36	24	107	1103	109	853	140	701	1591	1682	1557	275	845	701	75	556	635	368	2733	2335	2216	1856
ENSBTAG00000001721	2920	1124	1541	4131	3260	5874	762	3782	1401	789	644	136	511	1061	6475	1648	1612	6403	356	34	258	37	232	2238	2271	2107	315	1173	355	52	273	482	330	1082	1144	1179	1112
ENSBTAG00000015008	277	863	1164	85	39	60	17	30	2	13	14	2	4	9	43	26	6	32	9	2	14	0	12	78	100	134	33	128	20	1	10	14	6	76	80	97	51
ENSBTAG00000000456	0	2	3	0	0	0	0	0	0	0	0	0	0	0	0	0	0	2	0	0	0	0	0	0	0	0	0	0	0	0	0	0	0	0	0	0	0
ENSBTAG00000045633	1575	2678	2785	204	247	131	59	137	531	283	140	35	234	45	208	60	39	205	1450	165	1069	153	1140	100	60	86	36	100	344	10	90	146	85	333	613	455	473
ENSBTAG00000046008	64	44	72	106	107	147	24	115	104	69	29	9	49	4	44	9	5	39	55	9	25	0	23	55	49	31	7	39	68	10	76	77	60	45	46	48	61
ENSBTAG00000042362	0	0	0	0	0	0	0	0	0	0	0	0	0	0	0	0	0	0	0	0	0	0	0	0	0	0	0	0	0	0	0	0	0	0	0	0	0
ENSBTAG00000050282	0	0	0	0	0	0	0	0	0	0	0	0	0	0	0	0	0	0	0	0	0	0	0	2	0	0	0	0	0	0	0	0	0	0	0	0	0
ENSBTAG00000014751	0	0	0	0	0	0	0	0	0	0	0	0	0	89	623	105	143	434	2	0	0	0	2	6	3	4	4	8	0	0	0	0	0	0	0	0	0
ENSBTAG00000014749	0	0	0	0	0	0	0	0	2	0	0	0	0	23	132	27	23	69	0	0	0	0	0	2	0	0	0	0	0	0	0	0	0	0	0	0	0
ENSBTAG00000053400	0	0	2	0	0	0	0	0	0	0	0	0	0	7	26	9	5	17	0	0	0	0	0	0	0	0	0	3	2	0	0	0	0	0	0	0	0
ENSBTAG00000048442	0	0	0	0	0	0	0	0	0	0	0	0	0	0	0	0	0	0	0	0	0	0	0	0	0	0	0	0	0	0	0	0	0	0	0	0	0
ENSBTAG00000039176	0	0	0	0	0	0	0	0	0	0	0	0	0	0	0	0	0	0	0	0	0	0	0	0	0	0	0	0	0	0	0	0	0	0	0	0	0
ENSBTAG00000005522	0	0	0	0	0	0	0	0	13	7	8	6	14	0	0	0	0	0	0	0	0	0	0	0	0	0	0	0	0	0	0	0	0	0	0	0	0
ENSBTAG00000022227	690	734	669	311	368	248	32	180	3119	1598	2224	398	1770	18	75	18	10	41	479	37	143	40	131	1993	1860	2484	391	1535	813	65	383	793	276	973	883	918	852
ENSBTAG00000054268	1	0	0	1	0	0	0	0	6	0	0	0	1	0	2	0	0	0	0	0	0	0	0	5	3	2	0	0	0	0	0	0	0	4	2	2	0
ENSBTAG00000031306	0	0	0	0	0	0	0	0	1	2	0	0	0	0	0	0	0	0	0	0	0	0	0	0	1	0	0	0	0	0	0	0	0	0	0	0	0
ENSBTAG00000011986	949	1371	1300	231	317	206	27	142	2073	1092	1572	236	1055	23	124	31	29	84	415	39	270	49	283	930	846	601	183	554	464	52	238	340	209	190	402	196	256
ENSBTAG00000007331	658	793	912	251	347	286	29	165	274	177	106	24	66	14	89	29	19	83	177	31	130	14	82	392	245	170	35	169	488	58	280	351	172	253	224	191	174
ENSBTAG00000043802	0	0	0	0	0	0	0	0	0	0	0	0	0	0	0	0	0	0	0	0	0	0	0	0	0	0	0	0	0	0	0	0	0	0	0	0	0
ENSBTAG00000049240	12	2	0	2	0	0	0	0	6	0	0	0	0	0	0	0	0	0	0	0	0	0	0	2	0	0	0	0	0	0	0	0	0	2	0	0	0
ENSBTAG00000049785	0	0	0	0	0	0	0	0	0	0	0	0	0	0	0	0	0	0	0	0	0	0	0	0	0	0	0	0	0	0	0	0	0	0	0	0	0
ENSBTAG00000007933	1189	1111	1233	828	868	944	120	656	1616	951	846	178	974	39	236	76	61	247	1610	184	1211	267	1458	4177	2916	2664	499	1769	925	195	978	836	763	941	1068	1020	1194
ENSBTAG00000031178	675	620	570	101	138	119	28	83	202	124	105	22	91	16	72	17	13	98	355	49	193	22	166	403	499	297	106	294	234	13	177	201	106	931	1387	1006	1330
ENSBTAG00000054067	0	0	0	0	0	0	0	0	0	0	0	0	0	0	0	0	0	0	2	0	0	0	0	0	0	1	0	0	0	0	2	0	0	4	0	4	0
ENSBTAG00000052125	0	0	0	0	0	0	0	0	0	0	0	0	0	0	0	0	0	0	0	0	0	0	0	0	0	0	0	0	0	0	0	2	0	1	0	0	0
ENSBTAG00000011584	2236	1079	1325	459	863	452	72	379	367	270	94	41	148	19	97	30	19	81	174	38	192	29	187	1748	1848	1011	116	522	321	44	154	225	150	2266	2181	1693	2173
ENSBTAG00000009154	345	327	349	134	194	166	42	92	542	294	303	65	270	32	136	35	34	141	248	25	162	21	126	412	488	379	82	388	394	38	270	390	203	759	669	487	526
ENSBTAG00000011116	5	9	5	269	296	248	43	196	15	31	33	2	22	2	13	8	5	26	30	6	43	0	7	2	0	0	0	1	0	0	1	0	0	50	17	90	97
ENSBTAG00000038111	1	0	2	1	2	3	0	0	17	14	9	4	11	0	0	0	0	2	13	0	11	3	8	2	4	8	0	3	2	0	0	6	1	1	5	10	9
ENSBTAG00000016026	13742	65630	33715	3336	5380	6545	684	3773	126	252	275	28	106	142	1001	305	208	899	855	107	612	60	856	435	397	475	115	451	3426	119	675	1486	780	101	133	109	116
ENSBTAG00000002232	128	145	157	27	60	38	8	25	171	80	62	16	72	0	9	6	2	15	23	6	4	5	11	193	191	138	26	134	32	0	11	36	15	103	54	69	62
ENSBTAG00000023429	4	9	0	4	14	29	2	4	4289	2335	2182	550	2216	4	35	0	5	4	477	64	447	73	473	356	210	199	62	209	29	4	16	32	7	86	67	97	45
ENSBTAG00000011529	280	223	217	121	117	71	8	72	767	418	450	74	392	5	44	14	7	36	355	46	313	58	321	474	541	475	76	319	219	50	180	217	126	717	631	595	450
ENSBTAG00000011524	524	280	351	225	332	308	54	211	380	265	223	43	174	49	274	122	109	268	243	20	161	32	139	678	867	361	175	658	273	32	251	273	166	822	885	545	629
ENSBTAG00000018138	188	193	124	224	237	244	41	167	445	197	227	41	170	7	12	9	0	12	1947	379	2289	397	1997	380	517	470	120	374	258	29	244	240	205	215	283	238	209
ENSBTAG00000006222	322	232	244	339	273	508	72	256	399	234	179	52	174	46	248	83	48	194	86	17	47	13	66	470	534	423	99	381	279	48	261	289	193	236	272	179	193
ENSBTAG00000019007	0	0	0	0	0	0	0	0	0	0	0	0	0	0	0	0	0	0	0	0	0	0	0	0	2	2	1	0	2	0	2	0	0	0	1	0	0
ENSBTAG00000014140	988	1604	1233	295	373	433	39	245	716	402	348	61	302	25	169	46	25	147	2069	265	1583	374	1988	3551	5035	4968	873	2863	11786	1320	8621	12559	11964	944	1010	844	951
ENSBTAG00000021886	0	0	0	0	0	0	0	0	0	0	0	0	0	0	0	0	0	0	0	0	0	0	0	9	19	29	27	80	11	0	0	8	0	0	0	0	0
ENSBTAG00000044773	0	0	0	0	0	0	0	0	0	0	0	0	0	0	0	0	0	0	0	0	0	0	0	0	0	0	0	0	0	0	0	0	0	0	0	0	0
ENSBTAG00000002185	551	759	592	1895	1694	2641	382	1989	1114	571	477	116	570	192	1460	369	431	1736	851	78	539	96	622	592	692	926	140	464	849	122	550	847	531	609	541	550	554
ENSBTAG00000054849	0	0	0	0	0	0	0	0	0	0	0	0	0	0	0	0	0	0	0	0	0	0	0	100	118	71	30	103	0	0	0	0	0	0	0	0	0
ENSBTAG00000045597	0	0	0	0	0	0	0	0	0	0	0	0	0	0	0	0	0	0	0	0	0	0	0	0	0	0	0	0	0	0	0	0	0	0	0	0	0
ENSBTAG00000015413	157	153	136	34	33	29	6	35	525	289	260	48	305	5	21	11	11	27	88	9	48	7	44	218	276	155	41	150	166	44	223	196	123	639	604	429	445
ENSBTAG00000049533	0	0	0	0	0	0	0	0	0	0	0	0	0	0	0	0	0	0	0	0	0	0	0	0	0	0	0	0	0	0	0	0	0	1	0	0	0
ENSBTAG00000040061	1335	1204	1239	495	652	536	79	471	2674	1579	1340	323	1240	50	458	98	91	314	620	84	536	94	518	1785	2098	1510	522	1615	591	89	439	526	304	2291	2475	2462	2780
ENSBTAG00000050763	397	405	283	481	565	603	98	453	491	320	296	55	257	14	58	18	14	59	116	18	68	11	67	215	127	164	35	155	360	35	225	274	193	432	353	410	343
ENSBTAG00000050470	0	0	0	0	0	0	0	1	1	0	0	0	0	0	0	0	0	0	0	0	0	2	0	0	2	0	1	0	1	0	0	0	1	0	0	3	0
ENSBTAG00000009115	436	759	639	119	303	95	6	78	292	233	138	23	125	64	434	40	72	293	0	0	0	0	0	56	50	21	8	33	66	0	16	17	17	65	44	49	36
ENSBTAG00000015310	2841	1518	1475	410	689	474	99	422	2503	1241	1096	274	1124	78	564	258	120	363	338	39	201	15	150	1881	1886	1706	372	1345	2099	209	1188	1942	1299	3372	2803	2338	2346
ENSBTAG00000052041	0	0	0	0	0	0	0	1	0	0	0	0	0	0	0	0	0	0	0	0	0	0	0	0	0	0	0	0	0	0	0	0	0	0	0	0	0
ENSBTAG00000018346	0	0	0	0	0	0	0	0	0	0	0	2	0	0	0	0	0	0	0	0	0	0	0	4	0	0	2	0	0	0	0	0	0	0	0	0	0
ENSBTAG00000008714	49	60	63	16	18	6	0	10	12	6	7	2	5	2	24	9	18	56	4	0	0	0	6	3	1	3	2	0	19	4	2	4	4	6	30	7	22
ENSBTAG00000051936	64	50	66	370	337	403	58	387	754	634	450	99	367	69	437	93	127	521	112	10	45	16	95	82	90	176	40	94	166	25	170	158	153	140	194	214	203
ENSBTAG00000048200	0	0	0	0	0	0	0	0	1	0	3	0	4	0	0	0	0	0	0	0	1	0	0	0	0	8	0	0	0	0	0	0	0	0	2	0	2
ENSBTAG00000020028	213	624	653	208	259	311	47	247	1263	862	428	177	762	8	58	21	13	43	1527	134	762	191	1052	297	366	441	90	228	557	79	572	747	457	295	440	435	390
ENSBTAG00000015056	0	0	0	2	0	3	0	0	3143	4765	2222	463	1784	0	10	0	0	0	32	13	68	4	41	2	0	0	0	0	3684	314	1734	3358	4593	2	4	2	0
ENSBTAG00000043381	0	0	0	0	0	0	0	0	0	0	0	0	0	0	0	0	0	0	0	0	0	0	0	0	0	0	0	0	2	0	0	0	0	0	0	0	0
ENSBTAG00000014843	3965	3259	3314	1438	1336	1428	238	1049	5784	3218	2788	645	2460	169	977	250	218	842	2608	254	1578	324	1885	3771	3791	3993	729	2690	3577	611	3197	4328	2728	3437	3401	3051	2956
ENSBTAG00000047608	726	611	543	2058	1499	2288	381	1916	2038	1254	1106	238	848	88	608	154	130	533	840	95	537	104	576	575	560	712	138	426	1323	173	1062	1446	999	595	675	590	656
ENSBTAG00000048953	0	4	0	0	0	0	0	0	0	0	0	0	0	0	0	0	0	0	0	0	0	0	0	0	0	1	0	2	0	0	0	0	0	29	92	51	54
ENSBTAG00000048326	0	0	0	0	0	0	0	0	0	0	0	0	0	0	0	0	0	0	0	0	0	0	0	0	0	0	0	0	0	0	0	0	0	0	0	0	0
ENSBTAG00000046040	0	0	0	0	0	0	0	0	0	0	0	0	0	0	0	0	0	0	0	0	0	0	0	0	2	0	0	0	0	0	0	0	0	0	0	0	0
ENSBTAG00000046738	0	0	0	0	0	0	0	0	0	0	0	0	0	0	0	0	0	0	0	0	0	0	0	0	0	0	0	1	0	0	0	0	0	0	0	0	0
ENSBTAG00000051220	26	38	97	7	12	9	4	23	34	32	21	30	94	0	4	0	9	15	5	0	13	0	39	34	49	17	35	126	11	0	17	26	130	28	45	38	161
ENSBTAG00000048724	1	0	0	0	0	0	0	0	0	0	0	0	0	0	0	0	0	0	0	0	0	0	0	2	0	2	0	2	0	0	0	0	0	0	0	0	0
ENSBTAG00000050721	0	0	0	0	0	0	0	0	0	0	0	0	0	0	0	0	0	0	0	0	0	0	0	0	0	0	0	0	0	0	0	0	0	0	0	0	0
ENSBTAG00000045637	0	0	0	0	0	0	0	0	0	0	0	0	0	0	0	0	0	2	0	0	0	0	0	0	0	1	0	0	0	0	0	0	0	0	0	0	0
ENSBTAG00000031277	0	2	8	1	2	0	0	2	2	0	2	0	0	0	0	0	0	2	0	0	0	0	0	16	1	6	1	3	1	0	0	0	2	1	2	0	0
ENSBTAG00000006909	614	281	357	192	244	169	16	96	2314	1140	1372	259	1116	24	172	48	37	126	310	34	200	16	192	904	1084	890	169	751	2250	402	2511	3057	2015	1088	1851	908	836
ENSBTAG00000023426	177	275	225	164	206	266	31	181	810	409	439	127	511	6	56	12	1	34	32	2	14	0	21	292	160	258	37	146	11	6	18	25	26	281	322	290	266
ENSBTAG00000048975	1	6	4	0	3	4	4	4	8	4	16	0	5	0	1	0	2	2	0	0	0	0	0	11	6	9	0	0	0	0	0	0	0	17	17	6	4
ENSBTAG00000018538	260	193	157	116	117	134	27	92	613	340	303	43	305	15	63	14	18	68	173	30	106	24	144	233	234	266	43	155	210	16	101	223	111	484	503	500	368
ENSBTAG00000026861	4	4	1	0	1	2	0	1	3	3	2	0	3	0	0	0	0	0	1	0	1	0	4	2	9	10	3	3	6	0	2	7	1	13	14	10	3
ENSBTAG00000008111	3	10	28	3	3	4	1	0	39	14	22	0	4	2	7	4	1	11	0	0	4	0	2	204	220	167	84	190	173	34	163	178	194	3	11	2	0
ENSBTAG00000001497	6776	3360	2850	1047	1245	1024	170	800	1734	1183	723	171	746	100	503	137	69	286	1030	107	630	124	500	1673	3142	2092	537	1744	942	104	569	848	539	935	1633	1009	998
ENSBTAG00000012850	7	8	3	0	2	0	0	0	7	6	0	0	6	1	5	0	0	2	6	2	0	0	3	283	325	310	108	283	6	0	2	3	7	9	14	13	0
ENSBTAG00000019952	386	377	345	291	353	251	32	269	883	466	482	94	501	122	661	138	110	493	247	34	177	39	211	510	533	598	123	423	614	95	505	612	473	789	576	439	501
ENSBTAG00000019949	284	352	373	139	171	309	46	173	626	411	297	70	327	16	157	27	28	119	289	29	217	33	184	432	570	545	126	345	734	107	744	967	830	445	472	503	459
ENSBTAG00000001451	0	0	0	0	0	0	0	0	0	0	0	0	0	0	0	0	0	0	0	0	0	0	0	0	0	0	0	0	0	0	0	0	0	0	0	0	0
ENSBTAG00000015198	132	106	196	199	268	210	40	158	581	642	532	75	334	0	23	20	8	51	149	22	87	2	72	551	714	551	143	503	124	34	100	121	79	94	118	58	88
ENSBTAG00000014589	4	6	0	3	2	0	0	2	2	0	6	0	2	0	2	0	0	0	4	0	0	0	0	15646	14306	11983	3801	12515	0	0	3	0	0	6	1	2	1
ENSBTAG00000019535	0	0	0	0	0	0	0	0	0	0	0	0	0	0	0	0	0	0	0	0	0	0	0	0	0	4	2	2	0	0	0	0	0	0	0	0	0
ENSBTAG00000043591	0	0	0	0	0	0	0	0	0	0	0	0	0	0	0	0	0	0	0	0	0	0	0	0	0	0	0	0	0	0	0	0	0	0	0	0	0
ENSBTAG00000008299	26	21	21	2	3	15	0	14	25	16	20	2	4	0	5	2	0	2	15	4	12	0	5	847	599	1147	224	821	3350	336	2132	3080	2385	172	74	73	77
ENSBTAG00000018427	876	814	695	412	377	383	61	272	1311	573	617	119	616	30	294	72	52	266	713	48	366	58	420	1318	1412	1585	267	1104	784	98	600	785	546	2280	2610	2732	2487
ENSBTAG00000003833	196	96	116	20	8	12	0	18	2	2	8	0	3	2	6	0	0	2	4	0	0	0	0	105	138	168	12	65	89	11	41	82	92	166	198	204	249
ENSBTAG00000054797	148	166	143	48	71	41	1	42	206	76	85	26	104	14	38	22	19	59	67	19	45	8	67	248	289	135	40	149	94	10	69	81	43	182	204	173	157
ENSBTAG00000016306	0	0	0	0	0	0	0	1	0	0	0	0	0	0	1	0	0	0	0	0	0	0	0	0	0	0	0	0	0	0	1	0	0	2	0	0	1
ENSBTAG00000035437	479	638	610	142	233	142	17	120	707	332	366	100	315	51	232	73	38	176	241	53	180	28	169	823	803	644	135	537	272	47	273	300	166	659	654	596	625
ENSBTAG00000015221	4909	2012	1596	2559	2350	2643	517	2716	14246	10641	8606	2148	9551	110	641	152	111	523	6967	990	5650	1061	7266	1231	1100	1431	267	893	3213	442	2787	3193	2854	577	683	657	588
ENSBTAG00000052750	102	149	85	43	42	40	4	38	142	54	91	9	92	0	51	5	4	31	50	0	26	9	28	88	78	147	22	50	41	0	20	46	16	95	64	101	79
ENSBTAG00000000750	432	487	396	128	178	129	23	110	659	316	249	46	240	37	112	23	31	82	210	35	150	17	125	745	774	646	126	529	228	29	156	206	114	850	841	668	652
ENSBTAG00000023416	863	745	659	2165	2075	2780	499	2345	3924	2023	2061	396	1829	597	3129	1123	634	2770	286	33	257	47	214	456	346	231	64	195	848	132	720	820	553	259	182	306	220
ENSBTAG00000051032	0	0	0	0	0	0	0	0	0	2	0	0	8	0	0	0	0	0	0	0	0	0	0	0	0	0	0	0	0	0	0	0	0	0	0	0	0
ENSBTAG00000042460	0	0	0	0	0	0	0	0	0	0	0	0	0	0	0	0	0	0	0	0	0	0	0	0	0	0	0	0	0	0	0	0	0	0	0	0	0
ENSBTAG00000015377	45	44	48	46	33	18	4	9	76	75	17	2	13	0	9	0	0	13	0	0	2	0	6	33	20	18	1	32	14	0	13	17	12	27	105	15	32
ENSBTAG00000054179	0	0	0	0	0	0	0	0	0	0	0	0	0	0	24	6	3	18	0	0	0	0	0	0	0	0	1	0	0	0	0	0	0	0	0	0	0
ENSBTAG00000051206	2	2	2	64	63	55	6	44	0	0	0	0	0	145	1029	181	222	966	12	0	0	0	0	4	8	0	0	0	2	2	0	0	0	2	2	0	0
ENSBTAG00000007014	230	264	331	757	679	907	165	753	236	163	164	37	119	20	99	40	27	87	158	25	128	15	125	357	440	384	95	307	148	20	95	155	112	292	360	334	356
ENSBTAG00000014461	730	618	494	1529	1359	1853	245	1447	1728	1154	995	208	920	102	646	171	176	660	941	123	482	151	670	742	705	1105	154	519	1187	153	935	1341	967	781	983	821	727
ENSBTAG00000000742	7334	7577	8324	2472	3818	2279	356	1814	2989	3165	1826	372	1553	207	1144	133	171	598	1307	162	1053	130	1486	8038	12947	8747	2745	8584	1399	135	942	1065	1021	1506	2373	1277	998
ENSBTAG00000049951	0	0	0	0	0	0	0	0	0	0	0	0	0	0	0	0	0	0	0	0	0	0	0	0	0	0	0	0	0	0	0	0	0	0	0	0	0
ENSBTAG00000016999	1331	1352	1174	696	961	807	125	560	2062	1208	1050	264	902	162	982	228	201	836	844	78	579	84	600	1680	1910	1872	241	1019	1699	204	1230	1519	1105	822	874	935	788
ENSBTAG00000048733	0	0	0	0	0	0	0	0	0	0	0	0	0	0	0	0	0	0	0	0	0	0	0	0	0	0	0	0	0	0	0	0	0	0	0	4	0
ENSBTAG00000001324	499	336	331	518	836	576	62	354	627	541	285	65	201	7	80	25	10	61	134	12	72	8	78	1795	2738	1781	468	1621	498	69	431	547	212	459	1038	304	350
ENSBTAG00000000905	70	221	57	27	15	52	0	7	45	35	58	7	24	0	7	15	0	6	16	0	0	0	6	201	263	233	45	193	41	4	6	85	38	72	35	86	25
ENSBTAG00000044075	1241	1509	1200	716	795	838	103	574	3292	1521	1533	301	1311	75	494	139	142	490	1529	124	880	189	1033	1653	1556	1827	278	1112	1841	259	1421	2090	1425	1396	1469	1734	1631
ENSBTAG00000007273	2583	777	3470	247	423	14	3	34	25803	14782	15203	2493	11103	6	158	39	18	37	885513	102328	597332	84891	647720	2325	3244	1684	410	1383	164	5	51	218	49	135	231	26	98
ENSBTAG00000023411	4	0	6	0	6	5	0	2	5013	2993	2162	330	1632	0	2	0	0	0	13929	1760	11124	1553	10170	1634	1510	1340	345	1046	279	58	299	336	269	8	2	0	3
ENSBTAG00000000526	768	626	592	320	387	336	54	264	2053	1149	843	241	849	69	456	88	116	379	1115	131	751	101	740	1253	1107	991	262	825	996	118	720	886	508	1336	1365	1060	1091
ENSBTAG00000035556	4481	4645	3761	4240	3494	3524	653	3192	14518	7640	7399	1491	6886	484	2905	880	687	2749	3240	400	2159	488	2285	4939	4575	5562	938	3401	3916	548	3158	4298	3251	6190	5671	5856	5293
ENSBTAG00000043328	0	0	0	0	0	0	0	0	0	0	0	0	0	0	0	0	0	0	0	0	0	0	0	0	0	0	0	0	0	0	0	0	0	0	0	0	0
ENSBTAG00000017659	63	23	53	53	43	42	3	16	47	31	20	3	19	2	12	4	0	0	101	6	28	4	29	175	141	213	12	104	48	2	30	19	16	637	460	481	557
ENSBTAG00000018508	10	20	18	17	12	12	2	10	115	119	58	13	58	2	9	2	4	28	24	0	5	2	22	67	76	28	15	48	71	0	28	58	43	31	43	64	46
ENSBTAG00000049758	0	0	0	0	0	1	0	0	0	0	0	0	0	0	0	0	0	0	0	0	0	0	0	0	2	0	0	0	0	0	0	0	0	0	0	0	0
ENSBTAG00000049044	2	4	4	4	3	13	1	6	5	8	0	0	0	0	10	2	0	0	5	0	4	0	5	4	14	3	1	9	3	4	1	3	6	3	10	2	2
ENSBTAG00000045260	0	0	0	0	0	0	0	0	0	0	0	0	0	0	0	0	0	0	0	0	0	0	0	0	0	0	0	0	0	0	0	0	0	0	0	0	0
ENSBTAG00000049529	0	0	2	0	1	0	0	0	48	10	27	10	30	0	0	0	1	0	1	0	0	0	6	0	0	0	0	2	0	0	0	0	2	0	2	0	0
ENSBTAG00000005769	173	156	177	68	100	75	14	51	522	382	396	91	355	8	46	14	13	55	240	42	215	26	218	260	274	204	78	211	79	11	91	99	60	181	226	197	156
ENSBTAG00000004495	1863	1471	1404	718	691	748	99	460	4911	2405	2684	477	2015	75	467	115	112	489	1180	115	742	189	932	1681	1762	1946	269	1126	1747	199	1298	2362	1296	1613	1830	1923	1698
ENSBTAG00000031010	573	542	558	295	226	285	42	182	5278	2832	3084	635	2652	20	130	55	27	135	3322	359	2397	539	2866	774	616	627	118	370	857	82	519	708	548	452	468	387	449
ENSBTAG00000019577	425	940	624	52	113	83	16	67	117	108	110	15	85	3	42	25	14	45	371	44	125	46	203	605	512	1568	232	744	176	11	61	74	86	43	53	69	54
ENSBTAG00000002966	1444	1236	1305	421	575	361	34	282	5546	2894	2807	605	2786	81	414	118	97	275	965	107	711	120	631	1858	2073	1717	408	1226	990	159	879	1028	589	2274	2483	1669	1583
ENSBTAG00000011634	0	0	0	0	2	0	0	2	315	263	223	36	100	0	0	0	0	2	106	6	90	24	70	17	21	9	6	16	191	86	548	709	459	8	6	1	2
ENSBTAG00000054801	0	0	0	0	0	0	0	0	0	0	0	0	0	0	0	0	0	0	0	0	0	0	0	0	0	0	0	0	0	0	0	0	0	0	0	0	0
ENSBTAG00000049430	0	0	0	0	0	0	0	0	2	4	0	0	1	0	0	0	0	0	0	0	0	0	0	0	0	0	0	0	0	0	0	0	0	0	0	2	0
ENSBTAG00000054913	1	2	2	0	0	0	0	0	0	1	0	0	0	0	2	0	0	0	0	0	0	0	1	0	0	5	0	0	0	0	0	0	3	0	0	4	0
ENSBTAG00000053823	0	0	0	0	0	0	0	0	0	0	0	0	0	0	0	0	0	0	0	0	0	0	0	0	0	0	0	0	0	0	0	0	0	0	0	0	0
ENSBTAG00000054550	0	0	2	0	0	0	0	0	1	0	0	0	0	0	0	0	1	2	0	0	0	0	1	0	0	0	0	0	0	0	0	0	0	0	0	2	0
ENSBTAG00000010448	11	18	19	0	0	0	0	1	0	0	1	0	0	2	2	0	4	7	0	0	0	0	0	4	10	4	0	2	0	0	0	0	2	2	4	0	0
ENSBTAG00000053358	2	28	24	9	4	0	1	0	2	0	2	0	0	0	11	2	4	4	0	0	0	0	1	6	9	9	2	1	0	0	4	5	2	0	0	6	2
ENSBTAG00000030942	1427	1519	1009	2816	1867	3346	644	2799	3824	2300	2267	472	1989	107	637	183	194	766	1327	151	898	222	1129	1109	1186	1328	244	897	2315	268	1784	3357	1894	1146	1220	1276	1241
ENSBTAG00000018749	817	1110	1117	644	849	1430	209	687	1219	1100	745	164	768	56	224	39	66	254	448	35	275	46	504	691	786	1182	220	736	1497	228	1186	1920	1493	393	487	620	715
ENSBTAG00000009258	10	8	27	8	16	16	2	7	148	92	63	24	74	0	4	0	0	2	8	0	8	0	12	65	87	74	18	61	14	0	11	4	4	27	9	17	4
ENSBTAG00000045294	0	0	0	0	0	0	0	0	0	0	0	0	0	0	0	0	0	0	0	0	0	0	0	0	0	0	0	0	0	0	0	0	0	0	0	0	0
ENSBTAG00000007462	184	182	180	112	120	114	14	100	387	238	257	64	163	2	28	16	7	69	193	24	180	21	182	208	217	256	39	190	224	31	192	249	122	149	225	200	149
ENSBTAG00000011626	2144	2156	1880	1198	1444	1418	247	1053	3878	2164	1967	382	1686	132	807	230	139	627	1246	152	905	110	947	3820	4073	3397	796	2755	1443	149	960	1407	1031	1707	1845	1641	1589
ENSBTAG00000050167	0	0	0	0	0	0	0	0	0	0	0	0	0	0	0	0	0	0	0	0	0	0	0	0	0	0	0	0	0	0	0	0	0	0	0	0	0
ENSBTAG00000013600	904	1077	857	1471	1045	2058	282	1360	2165	1142	1161	208	1035	73	463	158	130	473	957	105	545	146	661	799	783	1018	183	694	1871	219	1442	2104	1391	630	762	804	785
ENSBTAG00000013602	1072	882	960	445	506	379	77	348	1480	787	742	165	761	79	441	118	95	365	558	69	443	76	417	1361	1640	1132	251	965	662	104	591	692	350	1891	1657	1237	1193
ENSBTAG00000050138	0	0	0	1	0	4	0	0	2	0	0	0	0	0	0	0	0	0	0	0	0	1	0	0	1	1	0	0	0	0	5	3	0	5	2	3	0
ENSBTAG00000018768	4671	4050	3278	4161	3681	4394	605	3035	10712	6193	5898	1136	5095	231	1501	358	295	1079	4946	549	3470	788	3839	5584	4993	5173	847	3094	3350	464	3029	3181	2587	8052	7206	7469	5728
ENSBTAG00000023106	250	262	313	527	513	667	97	440	861	485	439	114	433	54	353	70	68	280	217	31	206	31	225	305	315	363	57	227	381	71	373	438	493	270	284	317	310
ENSBTAG00000013629	987	1074	1086	648	779	932	121	629	1465	802	723	176	789	36	256	51	61	196	383	38	282	28	237	952	940	1136	210	642	664	71	482	622	449	286	391	360	427
ENSBTAG00000030993	3	2	4	0	4	2	0	0	0	0	2	0	0	0	0	0	0	0	0	0	0	0	0	13	10	11	0	6	0	0	2	0	0	0	0	0	0
ENSBTAG00000043046	0	0	0	0	0	0	0	0	0	0	0	0	0	0	0	0	0	0	0	0	0	0	0	0	0	0	0	0	0	0	0	0	0	0	0	0	0
ENSBTAG00000007068	344	477	440	8598	6972	10406	1735	7984	706	427	256	94	411	2845	16037	3739	2992	11578	169	24	121	14	168	640	557	576	83	380	779	83	397	760	944	888	863	743	590
ENSBTAG00000048819	0	0	0	0	0	2	0	0	0	0	0	0	0	1	1	0	0	0	0	0	0	0	0	0	0	0	0	0	0	0	0	4	0	0	0	0	0
ENSBTAG00000023407	2	0	0	1	2	0	0	2	1	6	5	2	4	0	2	0	0	0	35	9	32	3	36	21	46	10	9	28	0	0	0	0	0	20	34	13	12
ENSBTAG00000002029	2	2	6	0	1	2	0	2	7856	4641	3686	748	3289	0	11	0	0	0	1320	157	928	177	1186	1450	1366	1180	299	1133	0	0	0	6	2	2	34	5	4
ENSBTAG00000051421	0	0	26	103	65	55	4	19	29	9	53	20	128	0	11	2	0	0	2	3	0	0	0	20	0	20	0	2	76	48	208	964	2408	0	14	21	8
ENSBTAG00000004754	3	4	8	0	0	0	2	0	0	0	0	0	0	0	0	0	0	0	53	8	37	10	30	6	0	9	0	0	4	0	0	0	0	2	2	2	2
ENSBTAG00000054486	0	0	0	0	0	0	0	0	0	0	0	0	0	0	0	0	0	0	0	0	0	0	0	0	0	0	0	0	0	0	0	0	0	0	0	0	0
ENSBTAG00000042467	0	0	0	0	0	0	0	0	0	0	0	0	0	0	0	0	0	0	0	0	0	0	0	0	0	0	0	0	0	0	0	0	0	0	0	0	0
ENSBTAG00000043030	0	0	0	0	0	0	0	0	0	0	0	0	0	0	0	0	0	0	0	0	0	0	0	0	0	0	0	0	0	0	0	0	0	0	0	0	0
ENSBTAG00000048701	0	0	0	0	0	0	0	0	0	0	2	0	2	0	0	0	0	0	0	2	6	0	0	17	8	8	3	4	14	2	12	27	6	0	0	0	0
ENSBTAG00000000394	1005	813	969	285	512	282	45	149	1145	943	816	105	415	9	120	14	26	76	917	110	598	118	640	2082	1679	1292	400	1327	1847	252	1691	2014	1698	256	446	257	196
ENSBTAG00000030921	14	4	6	0	0	2	0	2	26	27	18	4	4	0	6	0	0	0	14	2	12	8	7	22	45	58	8	27	405	84	508	675	559	27	36	50	36
ENSBTAG00000008471	114	28	25	50	64	50	2	13	57	33	29	5	20	0	4	6	2	4	298	14	117	37	65	908	1301	944	113	525	144	36	161	134	70	695	1071	863	551
ENSBTAG00000030913	1034	1603	1222	762	644	409	44	239	794	643	441	149	457	6	64	29	10	74	2329	161	927	142	1405	2385	1873	2884	419	1309	931	236	1364	828	988	1919	2212	2333	2237
ENSBTAG00000009132	6	3	6	15	0	0	0	6	4431	3259	2033	426	1718	0	9	2	0	3	133	16	142	13	140	2206	1923	1635	528	1650	8	8	24	42	12	10	6	6	7
ENSBTAG00000050235	0	0	0	0	0	0	0	0	0	0	0	0	0	0	0	0	0	0	0	0	0	0	0	0	0	0	0	0	0	0	0	0	0	0	0	0	0
ENSBTAG00000045771	0	0	0	0	0	0	0	0	0	0	0	0	0	0	0	0	0	0	0	0	0	0	0	0	0	0	0	0	0	0	0	0	0	0	0	0	0
ENSBTAG00000046015	0	0	0	0	0	0	0	0	0	0	0	0	0	0	0	0	0	0	0	0	0	0	0	0	0	0	0	0	0	0	0	0	0	0	0	0	0
ENSBTAG00000021251	24	75	39	24	60	30	0	6	2837	2329	1730	280	1250	0	12	2	0	1	704	91	634	63	473	2847	2721	3003	921	2994	4048	590	3302	4198	3256	2	0	2	0
ENSBTAG00000021253	203	144	178	44	87	38	10	38	385	313	199	43	138	14	72	4	6	67	201	32	146	27	121	313	408	272	79	254	287	59	279	258	196	334	441	260	280
ENSBTAG00000021259	2224	1795	2231	92	176	119	22	90	1062	1006	564	138	543	21	96	21	33	115	241	34	184	22	223	832	788	364	126	564	285	32	203	303	317	336	406	218	258
ENSBTAG00000030836	549	344	493	246	311	153	11	83	676	358	195	48	195	37	150	20	9	56	416	76	354	33	280	1008	810	388	119	431	601	83	380	456	247	549	792	345	357
ENSBTAG00000021270	2	4	12	0	0	0	0	0	0	0	0	0	0	0	0	0	0	0	0	0	3	0	0	7	5	9	2	9	0	0	0	0	0	0	22	16	7
ENSBTAG00000021272	119	149	323	47	20	18	8	21	154	141	116	24	131	12	50	56	64	212	77	5	50	3	30	976	978	687	320	916	53	2	28	32	41	1317	1330	1082	989
ENSBTAG00000021276	2	3	0	5	2	8	0	2	28	46	34	6	10	0	0	0	0	2	62	4	15	2	6	4952	4787	6709	1096	3685	2	0	1	2	2	0	10	8	1
ENSBTAG00000030814	0	0	0	0	0	0	0	0	0	0	0	0	0	0	0	0	0	0	0	0	0	0	0	2	2	0	2	0	0	0	0	0	0	4	7	1	22
ENSBTAG00000048276	0	0	0	0	0	0	0	0	0	6	7	0	2	0	0	0	0	0	0	0	0	0	0	0	0	0	0	0	0	0	0	0	0	0	0	0	0
ENSBTAG00000021280	0	0	0	0	0	0	0	0	0	0	0	0	0	0	1	0	0	0	0	0	0	0	0	0	0	1	0	0	0	0	0	0	6	2	0	0	0
ENSBTAG00000023398	34	43	79	42	42	11	6	20	58	28	25	10	35	0	13	2	0	11	97	8	67	10	53	120	170	233	80	208	98	13	63	72	50	479	527	408	480
ENSBTAG00000021284	0	0	0	0	2	0	0	0	46	41	39	6	29	0	0	2	0	0	0	0	0	0	0	339	436	325	104	363	5	0	0	4	0	0	4	0	0
ENSBTAG00000021286	67	177	200	23	40	39	4	28	435	286	267	37	166	5	22	8	6	18	123	4	52	7	49	600	944	614	221	654	519	66	362	543	561	529	522	320	364
ENSBTAG00000021899	192	250	314	91	163	113	32	100	221	170	126	43	135	4	41	22	8	41	233	18	112	27	163	451	553	643	116	475	106	2	61	81	52	124	99	60	98
ENSBTAG00000021490	234	279	250	144	128	106	20	76	333	155	116	23	121	10	77	10	2	42	189	24	104	16	89	448	426	542	108	266	449	38	341	356	448	632	680	525	469
ENSBTAG00000021491	2102	1395	1316	10373	7621	10865	1760	7872	4783	3150	2537	518	2142	496	2728	639	734	3083	1390	141	924	151	956	1720	1847	2099	409	1284	2724	305	1708	2457	2159	1285	1565	1441	1269
ENSBTAG00000014153	366	331	304	173	156	146	18	102	707	376	383	82	311	36	233	57	43	144	238	16	154	32	166	562	561	443	110	334	284	36	190	233	193	440	553	465	452
ENSBTAG00000000160	859	540	429	159	169	249	33	165	10544	3997	6502	1049	4712	28	144	12	37	129	5280	721	4318	682	4338	720	609	483	112	453	1700	148	1083	1799	1359	413	539	493	520
ENSBTAG00000011645	1706	2077	1853	1816	1681	2246	305	1596	3926	2395	2428	523	2080	270	1659	477	402	1380	3661	363	2165	466	2359	2389	2540	3380	478	1677	2521	358	2127	2864	2089	2937	2929	3266	2891
ENSBTAG00000003134	2	17	0	0	0	0	0	0	0	1	0	0	0	0	1	0	0	0	0	0	0	0	0	5	0	0	0	5	0	0	0	0	0	2	2	0	0
ENSBTAG00000011437	4316	1802	4438	3897	4350	784	82	440	11123	4839	1422	202	858	636	4064	199	181	606	3052	237	1548	144	780	24185	28958	10476	1794	5918	5227	547	3035	3911	3583	15120	21262	5033	4627
ENSBTAG00000052654	0	0	0	0	0	0	0	0	0	0	0	0	0	0	0	0	0	0	2	17	101	26	94	0	0	0	0	0	0	0	0	2	0	0	0	1	0
ENSBTAG00000017407	155	199	370	171	118	261	41	200	291	222	214	34	206	13	74	11	17	65	142	8	65	8	76	334	296	415	79	278	164	11	84	189	158	101	114	176	140
ENSBTAG00000017418	457	527	604	250	317	244	62	167	840	583	432	137	442	42	217	63	70	210	388	43	210	35	223	799	934	786	157	624	506	65	420	415	304	1085	1067	789	769
ENSBTAG00000018186	1912	929	1023	578	560	526	80	321	5362	3136	2084	413	2215	42	200	50	46	208	784	74	439	63	294	4383	4714	2512	735	2466	1562	193	1340	1716	1004	1469	2641	926	897
ENSBTAG00000018189	159	14	12	4	22	1	0	2	44	12	8	0	3	0	0	0	2	0	54	5	9	7	29	102	248	246	65	245	8576	1386	7516	11160	6970	90	729	1132	148
ENSBTAG00000000524	2660	2752	2642	1159	1144	966	151	659	4261	2596	1508	378	1762	47	232	55	55	252	1644	92	570	158	762	3243	4048	5300	784	2635	9541	1302	6821	11062	8840	3014	3852	4370	3294
ENSBTAG00000003981	773	903	790	476	442	490	45	315	1547	1292	905	236	958	59	277	71	72	203	579	82	509	97	449	841	923	1166	220	712	768	111	619	708	563	942	1119	857	803
ENSBTAG00000020456	1513	1099	1153	391	487	450	68	281	6097	4415	3280	657	3048	149	750	135	169	704	2091	286	1502	201	1691	1850	2577	2054	434	1584	984	111	710	1004	741	1289	1869	1540	1416
ENSBTAG00000007100	1314	1480	1373	264	434	255	41	267	2050	1345	1036	222	790	63	399	78	75	232	584	108	488	87	486	1530	2057	1395	346	1241	916	166	849	1139	840	1334	1524	1072	1207
ENSBTAG00000007105	628	662	550	239	324	275	43	128	840	613	508	101	416	50	229	42	46	147	620	64	379	72	389	769	742	1001	174	615	665	113	686	734	505	762	1036	845	665
ENSBTAG00000007106	5255	4334	5203	16041	12068	14197	4463	20582	11326	8772	5333	1453	6484	542	3282	510	973	3734	9664	1242	6707	1013	9652	2617	2888	3181	747	2494	4799	549	3152	2900	4369	2241	2472	1729	2150
ENSBTAG00000014880	732	462	517	417	488	269	46	178	650	552	168	50	250	26	264	48	30	155	393	44	225	14	174	1841	1925	1570	422	1189	827	110	702	777	552	2223	3229	1362	1728
ENSBTAG00000014882	17	9	5	0	0	0	0	0	1	6	2	0	0	0	0	0	0	0	4	0	0	0	0	8	11	7	1	9	23	11	7	22	14	1	0	0	0
ENSBTAG00000023393	0	0	0	0	0	0	0	0	0	0	0	0	2	0	0	0	0	2	0	0	0	0	0	118	116	147	47	158	0	0	2	2	0	12	12	21	16
ENSBTAG00000051579	2	2	1	0	0	0	0	0	1	1	1	2	0	0	0	2	0	1	7	0	0	0	0	2	2	3	0	6	1	0	0	0	0	3	0	1	0
ENSBTAG00000010658	11341	22609	17940	3228	4003	3767	535	2124	9737	8224	4553	940	3954	116	758	169	197	863	3745	450	2503	316	3088	4977	5159	4847	990	3163	7608	945	5443	5621	4071	2683	3392	2257	2115
ENSBTAG00000019589	370	614	707	574	381	570	65	360	799	621	411	79	349	28	150	35	55	177	441	44	290	39	281	393	446	483	108	301	477	52	326	388	275	267	243	252	195
ENSBTAG00000021901	37	90	53	46	50	55	18	38	141	99	63	25	81	2	14	12	2	16	1132	102	601	86	693	2074	4658	3176	986	3123	78	16	73	42	42	4193	5176	3036	3632
ENSBTAG00000046909	0	0	0	0	0	0	0	0	0	0	0	0	0	0	0	0	0	0	0	0	0	0	0	0	0	0	0	0	0	0	0	0	0	0	0	0	0
ENSBTAG00000017882	130	110	122	35	69	26	5	11	119	164	48	25	67	0	2	0	0	5	1266	184	1305	97	1156	188	197	149	69	270	22	1	10	22	35	6	13	1	2
ENSBTAG00000018607	5	9	8	14	23	23	0	10	15	7	2	0	8	0	2	0	4	2	29	0	16	6	21	22	0	27	3	11	5	2	8	4	4	151	504	127	165
ENSBTAG00000053879	0	0	0	0	0	0	0	0	0	0	0	0	0	0	0	0	0	0	0	0	0	0	0	0	0	0	0	1	0	0	0	0	0	0	0	0	0
ENSBTAG00000053978	0	0	0	0	0	0	0	0	0	0	0	0	2	0	0	0	0	0	0	0	0	0	0	0	0	0	0	0	0	0	0	0	0	0	0	0	0
ENSBTAG00000051900	0	0	0	0	0	0	0	0	0	0	0	0	0	0	0	0	0	0	0	0	0	0	0	0	0	0	0	0	0	0	0	0	0	0	0	0	0
ENSBTAG00000037662	0	0	0	0	0	0	0	0	0	0	0	0	0	0	0	0	0	0	0	0	0	0	0	0	0	0	0	0	0	0	0	0	0	0	0	0	0
ENSBTAG00000052773	0	0	0	0	0	0	0	0	0	0	0	0	0	0	0	0	0	0	0	0	0	0	0	0	0	0	0	0	0	0	0	0	0	0	0	0	0
ENSBTAG00000040291	0	0	0	0	0	0	0	0	0	0	0	0	0	0	0	0	0	0	0	0	0	0	0	0	0	0	0	0	0	0	0	0	0	0	0	0	0
ENSBTAG00000053056	0	0	0	0	0	0	0	0	0	0	0	0	0	0	0	0	0	0	0	0	0	0	0	0	0	0	0	0	0	0	0	0	0	0	0	0	4
ENSBTAG00000018610	0	0	0	0	0	0	0	0	0	0	0	0	0	0	0	0	0	0	0	0	0	0	0	0	0	0	0	0	0	0	0	0	0	0	0	0	0
ENSBTAG00000030862	0	0	0	0	0	0	0	0	0	0	0	0	0	0	0	0	0	0	0	0	0	0	0	0	0	0	0	0	0	0	0	0	0	0	0	0	0
ENSBTAG00000051778	0	0	0	0	0	0	0	0	0	0	0	0	0	0	0	0	0	0	0	0	0	0	0	0	0	0	0	0	0	0	0	0	0	2	2	2	0
ENSBTAG00000050038	0	0	0	0	0	0	0	0	1	0	0	0	0	0	0	0	0	0	0	0	0	0	0	0	4	0	0	4	0	0	0	0	0	1	4	0	0
ENSBTAG00000048090	1562	1584	1696	1601	1547	1938	380	1449	3040	1790	1738	377	1579	154	803	184	193	744	1341	141	759	178	915	1862	2107	2123	438	1619	1909	217	1304	2216	1628	1568	1899	1893	1825
ENSBTAG00000017321	2889	4271	4107	1612	1713	2179	343	1495	6104	3834	3788	784	3342	342	2084	660	578	2323	3230	386	1853	420	1914	2923	3428	4377	738	2747	2553	337	1975	2952	1875	2319	2686	3476	3062
ENSBTAG00000021771	7711	15506	14000	2428	2954	2425	362	1666	17265	12122	9241	1835	7793	156	882	203	203	664	5570	654	3828	657	3656	18214	19267	20975	4659	16184	4296	499	2865	3754	2596	6664	7628	7360	7010
ENSBTAG00000017060	3858	1214	1685	632	886	439	60	327	772	725	286	79	381	17	124	25	30	102	4925	511	2428	367	2300	12361	20362	19392	3582	12101	1090	83	575	493	349	17833	24328	16234	17589
ENSBTAG00000017010	345	397	503	893	627	879	137	501	1034	551	415	89	414	72	417	73	91	327	590	25	242	35	289	636	551	852	101	330	593	67	395	420	259	798	609	528	491
ENSBTAG00000053509	7	2	4	10	6	2	0	8	8	16	15	4	4	10	14	0	2	9	4	0	2	0	6	24	125	72	13	48	0	0	2	2	2	4	6	8	8
ENSBTAG00000017486	751	643	1335	159	354	310	34	192	446	410	227	63	191	29	111	11	31	85	178	12	163	17	114	1725	2670	1150	417	1392	154	10	137	195	162	102	201	117	107
ENSBTAG00000007818	3775	4615	4472	1459	1909	1583	195	931	2716	2498	1358	297	1324	158	1101	182	231	771	1631	251	1530	202	1326	3222	3387	4054	709	2191	1636	156	1019	1367	920	1855	2377	1863	1737
ENSBTAG00000050478	47	31	36	27	58	50	7	45	21	25	11	4	11	2	4	2	0	2	7	0	1	0	0	28	23	13	3	15	7	4	22	7	2	2	6	8	4
ENSBTAG00000023907	36114	16232	15979	6211	9277	4581	888	3676	12312	11020	4329	1102	4411	168	983	174	169	693	88863	13474	78472	8980	103791	18767	20890	9414	2104	6576	7934	902	5035	6905	4613	5486	8289	3269	3666
ENSBTAG00000024162	732	383	298	149	207	136	19	76	1206	1243	831	146	568	12	110	24	29	99	201	22	125	19	140	286	324	418	34	176	325	32	204	328	208	432	538	432	348
ENSBTAG00000051007	3	0	0	4	0	0	0	0	4	1	2	0	5	2	0	0	0	0	0	0	0	0	0	1	1	2	0	1	0	0	0	0	0	11	0	2	0
ENSBTAG00000030775	25	48	65	183	183	261	39	172	71	91	81	4	12	7	71	15	14	19	48	4	26	9	54	100	100	207	35	138	57	9	47	85	24	132	186	192	129
ENSBTAG00000030764	0	0	0	0	0	0	0	0	0	0	0	0	0	0	0	0	0	0	0	0	0	0	0	0	0	0	0	0	0	0	0	0	0	0	0	0	0
ENSBTAG00000048318	1	0	1	0	0	0	0	0	0	0	0	0	0	0	0	0	0	0	0	0	0	0	0	0	0	0	0	0	0	0	0	0	0	0	0	0	0
ENSBTAG00000011802	70866	65363	83256	12552	14678	8770	1202	5569	13878	7789	1798	686	2774	1272	7332	1385	1695	6673	2679	300	1846	168	2364	31614	25852	15695	4916	16154	22565	1938	11570	13458	7334	8245	12594	4561	5944
ENSBTAG00000019269	73644	68683	88723	13906	15495	9255	1466	6233	15354	8658	1830	669	3074	1266	7435	1407	2000	7745	3406	426	2338	248	3203	37207	25516	18127	5163	16857	30344	1998	13337	16273	9176	6615	9589	4129	4737
ENSBTAG00000020404	5	4	0	6	13	3	0	6	4802	6727	7276	1537	6444	0	13	0	0	2	12829	2646	14958	2527	19325	1	0	9	2	8	3	0	4	26	2	1	4	8	5
ENSBTAG00000020409	8	5	4	2	0	0	0	0	18	7	5	4	8	0	8	2	2	6	49	3	16	4	54	3	5	10	0	0	0	0	0	0	7	4	2	2	0
ENSBTAG00000018936	4576	1851	1796	592	764	376	53	255	3141	2134	830	202	789	47	337	33	62	236	5471	1177	6689	863	5914	1822	2037	1336	393	1303	2115	314	1911	2305	2039	711	1112	603	554
ENSBTAG00000003148	2200	2178	2188	774	937	804	140	544	3025	2188	1550	326	1432	113	757	125	121	453	1291	124	859	134	742	3444	3969	3515	789	2569	1774	242	1466	1536	1118	3544	3849	2861	2674
ENSBTAG00000003161	1484	1322	1387	1352	2490	3710	619	2818	1452	1733	1382	370	1656	126	673	205	262	951	807	146	713	142	1162	584	918	993	233	797	722	120	763	994	1045	692	1004	877	1037
ENSBTAG00000021984	2	4	2	2	3	5	2	2	0	1	2	0	1	0	1	0	0	1	0	0	0	0	0	145	98	108	34	104	2	0	0	1	0	1	0	5	0
ENSBTAG00000030670	1307	902	1037	747	869	723	124	454	1808	1073	839	167	725	242	1369	267	256	964	508	83	404	35	310	1861	2148	1739	416	1542	1062	214	1063	1153	712	1334	1474	944	737
ENSBTAG00000011495	2612	1913	2528	582	787	503	89	378	1897	1437	848	185	704	31	257	63	64	247	693	106	680	68	506	1956	2201	1450	392	1377	1860	201	1287	1275	873	687	963	519	559
ENSBTAG00000004777	5041	3068	3100	9018	10557	14246	1983	9603	1155	821	489	114	467	120	820	250	194	637	298	13	94	30	127	244	218	225	37	187	435	31	190	436	319	153	116	266	256
ENSBTAG00000044930	0	0	0	0	0	0	0	0	0	0	0	0	0	0	0	0	0	0	0	0	2	0	0	0	0	0	0	0	0	0	0	0	0	0	2	0	0
ENSBTAG00000005503	879	1261	1213	866	1147	1157	187	819	590	580	431	111	392	16	267	79	88	219	177	17	107	22	53	955	912	1316	196	662	449	89	443	485	343	649	833	642	534
ENSBTAG00000052513	0	0	0	0	0	0	0	0	0	0	0	0	0	0	0	0	0	0	0	0	0	0	0	8	0	0	2	3	0	0	0	0	0	0	0	0	0
ENSBTAG00000007039	835	987	1091	303	403	464	67	284	3371	2133	1837	373	1446	47	361	67	98	300	843	129	724	113	906	987	1309	1585	283	965	848	112	811	1119	776	1219	1143	1167	1036
ENSBTAG00000043957	180	116	83	51	74	38	6	58	552	412	335	82	304	2	6	4	0	6	97	0	42	4	59	121	172	80	37	138	134	18	70	80	143	8	37	43	20
ENSBTAG00000054155	0	1	0	0	2	0	2	6	0	2	0	2	6	0	0	0	0	0	0	0	0	0	0	0	9	4	0	3	2	0	0	0	0	2	0	0	0
ENSBTAG00000052599	0	0	0	0	0	0	0	0	45	21	17	11	27	0	0	0	0	0	0	0	0	0	0	0	0	0	0	0	0	0	0	0	0	0	0	0	0
ENSBTAG00000053000	0	0	0	0	0	0	0	0	313	165	202	38	132	0	0	0	0	0	0	0	0	0	0	0	0	0	0	1	0	0	0	0	1	0	0	0	0
ENSBTAG00000046447	0	1	2	0	0	0	0	0	522	213	176	83	272	0	3	0	0	0	0	0	0	0	0	0	0	2	0	0	0	0	0	1	0	0	0	0	0
ENSBTAG00000004742	215	166	90	38	41	8	5	23	55	39	26	4	34	2	14	10	3	19	86	16	100	7	68	730	770	335	131	430	183	18	174	174	91	601	655	385	416
ENSBTAG00000044270	0	0	0	0	0	0	0	0	0	0	0	0	0	0	0	0	0	0	0	0	0	0	0	0	0	0	0	0	0	0	0	0	0	0	0	0	0
ENSBTAG00000030105	0	0	0	0	0	0	0	0	0	0	0	0	0	0	0	0	0	0	0	0	0	0	2	0	0	0	0	0	0	0	0	0	0	0	0	0	0
ENSBTAG00000018682	471	431	491	236	267	219	45	210	1543	1520	1092	240	1085	67	324	69	46	204	652	88	571	101	416	835	1070	1174	236	803	266	48	272	299	159	685	747	770	512
ENSBTAG00000023384	73	152	214	244	183	445	79	286	15543	10234	9658	2682	11432	19	196	63	72	259	12623	1668	9977	2514	9620	322	346	505	95	353	216	4	92	150	107	62	51	193	123
ENSBTAG00000052342	3	17	21	18	12	22	2	28	1168	810	837	306	1257	2	10	4	4	20	3871	255	1472	532	3884	14	15	24	6	24	18	0	7	15	10	4	3	10	10
ENSBTAG00000030629	2	0	0	1	0	0	0	2	5	0	3	0	0	0	1	0	0	6	808	150	783	20	132	4	1	5	0	2	2	0	2	2	4	9	6	5	3
ENSBTAG00000018688	574	2345	1496	190	304	385	35	154	110	93	40	2	38	42	288	71	62	250	135	2	50	8	51	352	524	660	107	331	3945	579	3250	3545	2983	183	309	332	225
ENSBTAG00000053201	99	78	93	14	29	18	2	15	35	31	20	5	18	2	7	6	7	13	24	5	24	0	5	124	129	61	15	57	85	21	73	52	29	58	98	48	46
ENSBTAG00000014306	957	889	909	219	343	175	35	160	300	214	177	28	105	37	200	66	55	153	281	19	108	13	198	934	1315	1034	192	675	658	115	532	511	441	614	817	611	471
ENSBTAG00000011876	425	301	384	109	157	116	19	70	637	295	270	63	223	38	171	81	44	150	254	13	217	23	166	732	667	568	149	484	213	25	183	158	105	767	778	607	546
ENSBTAG00000011880	141	103	158	57	56	20	6	17	122	41	31	8	28	2	13	8	2	26	64	10	48	4	28	212	240	157	40	107	232	27	187	198	141	255	348	232	273
ENSBTAG00000030585	0	2	1	0	0	0	0	0	126	117	77	14	26	0	0	0	0	0	2859	398	1877	322	2808	0	0	0	0	2	0	0	0	0	0	0	0	0	0
ENSBTAG00000037096	0	0	0	0	0	0	0	0	0	0	0	0	0	0	0	0	0	0	0	0	0	0	0	0	0	0	0	0	0	0	0	0	0	0	0	0	0
ENSBTAG00000053305	11	28	30	0	0	0	0	0	36	27	28	4	6	4	52	2	0	34	0	0	0	0	0	0	0	0	0	0	2	0	0	2	0	0	0	0	0
ENSBTAG00000021447	28	77	48	0	0	0	0	0	277	248	98	18	75	8	100	14	14	59	0	0	0	0	0	3	6	0	0	0	2	0	0	0	2	1	3	0	0
ENSBTAG00000033679	457	144	186	94	107	55	13	52	853	651	390	77	353	31	174	20	38	106	452	63	366	26	329	726	753	475	125	393	207	42	181	210	134	257	259	238	226
ENSBTAG00000051916	45	9	17	11	26	8	0	6	74	35	33	3	22	0	4	0	0	6	64	0	19	2	16	1007	1295	995	137	518	177	17	140	322	59	63	113	113	35
ENSBTAG00000043298	0	0	0	0	0	0	0	0	0	0	0	0	0	0	0	0	0	0	0	0	0	0	0	1	0	0	0	0	0	0	0	0	0	0	0	0	0
ENSBTAG00000055107	651	689	798	1895	1173	1901	344	1510	1998	947	956	179	803	68	421	98	91	407	588	57	299	82	379	466	461	647	102	406	769	82	424	656	592	523	405	433	360
ENSBTAG00000008167	3166	2393	2500	2264	2212	3935	368	1890	3162	1616	1593	350	1355	105	788	191	105	451	711	86	479	64	421	1462	1672	1221	342	1192	1039	116	694	1174	531	1627	1566	1251	1232
ENSBTAG00000004791	1362	1566	1708	786	763	627	106	541	2695	1574	1147	192	971	39	283	77	68	264	941	139	626	68	641	1617	1713	1647	464	1516	1656	196	917	1289	1130	1373	1771	1314	1282
ENSBTAG00000001771	1930	1957	2045	1448	1586	1446	263	1247	3411	1691	1646	377	1561	275	1753	347	283	1113	1263	120	826	160	807	3596	3385	3012	752	2509	1309	186	1118	1442	880	3153	3332	2778	2910
ENSBTAG00000037616	0	6	0	0	0	0	0	0	2	0	0	0	0	0	0	0	0	0	0	0	0	0	0	0	2	0	0	0	0	0	0	0	0	4	2	0	0
ENSBTAG00000042581	0	0	0	0	0	0	0	0	0	0	0	0	0	0	0	0	0	0	0	0	0	0	0	0	0	0	0	0	0	0	0	0	0	0	0	0	0
ENSBTAG00000045272	0	0	0	0	0	0	0	0	0	0	0	0	0	0	0	0	0	0	0	0	0	0	0	0	0	0	0	0	0	0	0	0	0	0	0	0	0
ENSBTAG00000053559	0	0	0	0	0	0	0	0	7	11	5	6	10	0	0	0	0	0	0	0	0	0	0	46	37	17	10	30	0	0	0	0	0	0	0	0	0
ENSBTAG00000000973	3	35	11	2	10	12	2	4	29160	20171	11732	3239	13171	0	47	0	0	3	18	2	12	0	10	883	1049	458	151	472	1	0	10	28	10	4	3	4	15
ENSBTAG00000011001	2566	1512	2385	855	1601	777	137	621	1479	910	531	152	626	87	378	61	54	215	991	41	398	93	704	4386	4721	4140	1010	3409	544	57	321	855	377	297	368	446	491
ENSBTAG00000043221	0	0	0	0	1	0	0	0	0	0	0	0	0	0	0	0	0	0	0	0	0	0	0	0	0	0	0	0	0	0	0	0	0	0	0	0	0
ENSBTAG00000009214	1832	1918	1638	656	1035	334	57	248	4916	2628	1336	260	1029	798	4613	369	417	1666	2494	235	1301	203	1722	4938	4763	3199	628	2210	1899	208	1466	1831	1536	2148	2047	1475	1535
ENSBTAG00000052589	0	1	2	0	0	1	0	0	0	0	0	0	0	0	0	0	0	0	0	0	0	0	0	0	0	0	0	0	2	0	3	0	0	1	2	3	4
ENSBTAG00000020787	2190	1923	2293	776	970	766	156	659	3393	2170	1758	357	1528	236	1340	227	294	1097	1267	146	933	177	1116	2379	2512	2234	526	1814	1141	161	1020	1216	821	1721	1816	1370	1312
ENSBTAG00000012837	3084	1085	2401	225	569	256	30	180	4	7	0	2	4	6	95	9	9	69	229	19	158	13	200	83	63	6	7	38	4	0	2	2	0	2	0	3	2
ENSBTAG00000049122	38	22	60	17	24	10	2	7	414	268	48	48	161	0	2	0	0	12	462	90	470	35	515	1257	1624	976	434	1371	30	6	61	41	14	48	55	50	51
ENSBTAG00000006479	816	811	888	221	287	273	75	163	1230	665	522	128	552	124	633	170	160	589	604	63	314	50	334	929	870	1059	173	607	730	138	740	784	599	1077	979	931	1031
ENSBTAG00000023377	4249	5388	5840	987	1172	1108	196	877	2220	1823	1033	215	774	978	5494	751	1300	4917	766	121	676	98	1022	1399	1780	1163	265	1013	1424	65	461	660	458	2071	2817	2087	2379
ENSBTAG00000030592	8	18	12	24	13	39	2	25	21	27	14	3	24	2	17	2	2	14	9	1	4	1	12	22	3	22	3	9	10	2	9	29	26	8	14	9	13
ENSBTAG00000023375	257	304	232	328	216	345	52	260	511	263	311	49	273	27	173	57	59	181	238	24	94	35	138	344	315	572	59	230	361	37	189	393	214	411	332	424	329
ENSBTAG00000019202	1882	1649	1964	722	852	601	88	427	3087	1975	1550	318	1265	80	464	102	74	331	1014	116	612	77	631	2721	2868	2229	650	2014	2903	324	2098	2846	2138	1228	1500	1167	1375
ENSBTAG00000051541	3265	1606	785	22	30	28	2	20	102	137	77	22	74	11	62	21	6	48	29	6	45	3	41	95	26	31	7	32	659	47	321	519	365	34	26	12	11
ENSBTAG00000040193	374	238	141	0	16	6	0	2	21	23	18	6	25	0	1	2	1	6	13	1	7	0	7	16	4	3	4	8	337	12	105	238	129	2	4	12	7
ENSBTAG00000003718	1832	931	623	507	441	770	110	669	2969	1965	1928	389	1760	51	345	75	100	358	5812	833	4914	1021	5371	308	395	586	86	288	515	43	390	599	418	483	494	439	437
ENSBTAG00000019129	172	152	177	73	66	66	6	47	2458	2762	2125	478	1995	2	43	3	7	48	1532	204	1167	251	1604	199	212	224	61	214	120	4	63	108	88	192	234	294	276
ENSBTAG00000024815	498	386	317	111	142	80	17	80	686	343	387	67	265	47	258	51	44	185	202	32	175	15	166	350	438	263	87	287	319	43	279	373	261	375	483	424	443
ENSBTAG00000048450	0	0	0	0	0	0	0	0	0	0	0	0	0	0	2	0	0	0	0	0	0	0	0	0	0	0	0	0	0	0	0	0	0	0	0	0	0
ENSBTAG00000008240	292	4797	2839	64	108	176	16	109	22	21	10	2	9	4	34	29	18	121	8	0	1	0	7	62	45	199	18	103	194	18	83	145	74	57	52	46	61
ENSBTAG00000051065	1	8	6	0	2	0	0	0	0	2	0	0	0	0	0	0	0	0	0	0	0	0	0	0	0	0	1	1	0	0	0	0	0	0	0	0	0
ENSBTAG00000003916	642	689	687	835	862	751	123	648	1900	812	905	192	772	125	612	193	120	568	681	61	380	77	414	962	892	1004	154	580	888	122	660	993	666	558	600	549	493
ENSBTAG00000053091	0	2	4	0	0	0	0	0	0	2	1	0	0	0	0	0	0	0	0	0	0	0	0	2	0	0	0	1	0	0	2	1	2	3	4	1	3
ENSBTAG00000004891	532	356	329	299	253	372	81	263	1351	756	640	128	533	19	97	28	17	102	365	17	249	58	279	293	400	444	43	232	545	79	436	655	469	333	279	290	263
ENSBTAG00000030593	1459	1801	2222	1026	1133	784	155	710	1420	1128	489	126	433	51	298	64	122	335	639	47	336	51	667	3423	4228	4772	677	2204	1107	112	711	1006	663	3298	3926	3052	2171
ENSBTAG00000051752	210	201	291	118	135	62	18	69	161	156	55	22	54	4	33	16	15	55	89	4	16	4	34	449	575	354	75	239	136	17	82	117	79	346	463	330	200
ENSBTAG00000000502	0	0	0	2	0	0	0	4	41	22	19	6	20	0	0	0	0	2	0	0	0	0	2	0	0	0	2	0	0	0	0	0	0	0	0	2	0
ENSBTAG00000054674	0	0	0	0	0	0	0	0	0	0	0	0	0	0	0	0	0	0	0	0	0	0	0	0	0	0	0	0	0	0	0	0	0	0	0	0	0
ENSBTAG00000052583	1	1	2	2	1	0	0	0	0	2	0	0	0	0	0	0	0	1	0	1	3	0	3	12	5	9	2	9	0	0	0	0	0	57	36	28	28
ENSBTAG00000009942	1220	1183	1328	618	604	509	85	532	1851	1276	1004	234	900	902	5638	806	1215	4350	2069	230	1287	173	1625	1497	1741	2244	351	1099	555	54	320	389	264	5146	4829	4414	3381
ENSBTAG00000054477	0	0	0	0	0	0	0	0	0	0	0	0	0	0	0	0	0	0	0	0	0	0	0	0	0	0	0	0	0	0	0	0	0	0	0	0	0
ENSBTAG00000049193	0	0	0	2	0	0	0	0	0	1	0	0	2	0	0	0	0	0	2	0	2	0	0	4	1	0	0	0	2	0	0	0	1	26	10	11	1
ENSBTAG00000030581	1021	894	980	427	520	369	59	219	1120	759	508	106	396	35	173	24	48	150	462	58	318	37	283	1265	1240	1211	244	796	617	67	497	498	437	1320	1507	1143	1067
ENSBTAG00000021158	553	594	950	855	1008	790	128	704	959	689	479	101	590	276	1715	348	267	1229	714	65	417	71	397	1253	1634	1360	354	1186	165	23	97	116	170	2855	2285	1925	2207
ENSBTAG00000012798	21	2	2	2	13	0	0	0	19	33	7	0	4	0	0	0	0	0	0	0	3	0	1	6	15	1	0	5	0	0	16	0	0	17	32	0	0
ENSBTAG00000052043	0	0	0	0	0	0	0	0	0	0	0	0	0	0	0	0	0	0	0	0	0	0	0	0	0	0	0	0	0	0	0	0	0	0	0	0	0
ENSBTAG00000047978	0	0	0	0	0	0	0	0	0	0	0	0	0	0	0	0	0	0	0	0	0	0	0	0	0	0	0	0	0	0	0	0	0	0	0	0	0
ENSBTAG00000013806	87	87	60	274	167	441	56	226	304	241	193	51	132	41	269	52	65	318	369	53	233	45	259	81	169	150	20	89	163	19	96	275	127	188	187	158	170
ENSBTAG00000046385	2094	2054	1884	1025	1046	1407	193	920	3560	1760	1993	441	1982	127	828	177	243	671	1383	134	844	128	1091	2419	2901	3129	534	2011	2969	400	2388	4250	2412	1986	2045	2237	2105
ENSBTAG00000004061	46	16	53	4	4	10	1	10	42	25	19	0	25	0	7	2	0	10	6	0	15	3	13	57	28	78	16	50	47	2	37	55	51	63	36	30	32
ENSBTAG00000000746	5689	3748	4311	687	817	691	122	646	7137	4146	3365	689	3113	351	2069	496	488	1912	1875	307	1755	244	1740	3262	4103	2967	842	2656	1592	123	855	1283	800	1611	1916	1241	1349
ENSBTAG00000000752	89	9	16	13	13	10	2	4	44	27	10	0	10	1	0	0	0	3	27	0	15	2	14	94	73	70	2	25	96	25	119	80	32	145	184	110	91
ENSBTAG00000047076	0	0	0	0	0	0	0	0	0	0	0	0	0	0	0	0	0	0	0	0	0	0	0	0	0	0	0	0	0	0	0	0	0	0	0	0	0
ENSBTAG00000049158	146	152	204	167	148	199	32	121	170	105	140	20	116	6	61	21	15	60	86	10	56	10	68	121	133	195	24	94	104	10	76	124	37	87	143	169	157
ENSBTAG00000055206	24	24	24	12	15	4	2	1	11	18	7	4	13	0	7	4	4	2	11	0	0	2	4	27	18	17	2	11	17	6	9	12	2	18	22	29	14
ENSBTAG00000004538	0	0	1	0	0	0	0	0	0	0	0	0	0	0	0	0	0	0	0	0	0	0	0	0	2	0	0	0	0	0	0	0	0	0	4	0	0
ENSBTAG00000040393	4	0	4	0	0	0	0	6	22	1	0	0	2	1	4	2	2	12	9	0	3	0	1	0	0	0	0	0	22424	3030	17155	22100	14166	0	0	0	6
ENSBTAG00000051758	0	0	0	0	0	0	0	0	0	0	0	0	0	0	0	0	4	5	1	0	1	0	0	7	8	20	10	17	490	48	370	316	172	0	0	2	0
ENSBTAG00000048736	32	16	40	12	14	3	0	4	38	20	13	5	12	0	6	4	0	4	2	0	0	0	0	31	46	23	13	23	3	0	7	3	3	2	3	5	1
ENSBTAG00000047651	0	0	0	0	0	0	0	0	0	0	0	0	0	0	0	0	0	0	0	0	0	0	0	0	0	0	0	0	0	0	0	0	0	0	0	0	0
ENSBTAG00000049102	0	0	2	0	0	0	0	0	2	0	0	0	0	0	0	0	0	0	0	0	0	0	0	0	0	0	0	0	0	0	0	0	0	0	2	2	0
ENSBTAG00000012023	0	0	0	0	0	0	0	0	0	0	0	0	0	0	0	0	0	0	0	0	0	0	0	0	0	0	0	0	0	0	0	0	0	3	0	2	2
ENSBTAG00000053325	0	0	0	0	0	0	0	0	0	0	0	0	0	0	0	0	0	0	0	0	0	0	0	0	0	0	0	0	0	0	0	0	0	0	0	0	0
ENSBTAG00000049601	0	0	0	0	0	0	0	0	0	0	0	0	0	0	0	0	0	0	0	0	0	0	0	0	0	0	0	0	0	0	0	0	0	0	0	0	0
ENSBTAG00000037965	0	0	0	0	2	2	2	6	6	4	8	0	0	0	0	0	0	0	0	0	1	0	0	4	1	6	2	0	2	0	0	4	0	7	10	1	2
ENSBTAG00000050787	0	0	0	0	0	0	0	0	0	0	0	0	0	0	0	0	0	0	0	0	0	0	0	0	0	0	0	0	0	0	0	0	0	0	0	0	0
ENSBTAG00000012867	887	720	794	259	269	218	40	125	1015	712	633	106	402	24	153	42	32	104	416	47	301	28	316	1125	1123	637	233	821	588	90	540	641	321	673	816	611	544
ENSBTAG00000002896	935	591	531	547	541	591	86	332	1993	1239	976	166	829	123	752	179	199	708	638	84	493	52	431	1291	1280	778	261	938	1430	177	1255	1588	1021	859	1156	833	846
ENSBTAG00000043742	0	0	0	0	0	0	0	0	0	1	0	0	0	0	0	0	0	0	0	0	0	0	0	0	0	0	0	0	0	0	0	0	0	0	0	1	0
ENSBTAG00000049543	565	881	531	461	473	702	105	419	451	309	325	76	306	29	147	30	65	233	308	31	149	41	252	379	501	608	94	271	1557	167	911	1881	1232	560	662	806	659
ENSBTAG00000016954	419	488	445	213	200	167	34	116	509	355	276	46	243	22	176	39	24	131	349	51	254	37	263	644	504	600	88	404	590	73	380	467	358	511	630	538	486
ENSBTAG00000012497	2738	2669	2372	1231	1390	1278	217	999	4181	2359	2340	451	1965	206	898	230	215	838	1524	185	1057	149	1004	3968	3829	3595	870	2500	2271	277	1706	2243	1312	2991	3549	3404	2747
ENSBTAG00000049541	2	55	41	2	7	17	2	14	0	5	6	0	0	2	5	6	2	5	2	0	0	0	13	12	16	89	12	51	12	2	4	33	22	51	25	55	63
ENSBTAG00000005219	87	102	148	34	37	12	1	7	34	11	6	0	7	4	13	0	2	5	10	2	4	0	6	145	86	62	25	56	61	1	4	40	22	4	10	2	6
ENSBTAG00000050901	0	0	0	0	0	0	0	0	0	0	0	0	0	0	0	0	0	0	0	0	0	0	0	0	0	0	0	0	0	0	0	0	0	0	0	0	0
ENSBTAG00000053288	17	20	14	1	6	1	0	5	32	39	12	3	26	0	2	0	0	2	4	0	2	0	0	12	8	5	0	15	9	3	7	13	3	7	2	2	2
ENSBTAG00000054028	0	17	2	6	0	2	0	2	33	0	5	0	9	0	0	0	0	0	3	0	0	0	0	6	6	3	2	3	2	0	0	1	0	4	0	0	1
ENSBTAG00000040386	3	0	5	0	0	2	0	4	5	2	2	0	0	0	0	0	3	4	29	0	7	0	4	0	0	2	0	0	0	0	0	0	0	0	0	0	0
ENSBTAG00000000185	18	14	14	2	12	0	0	2	50	46	32	4	21	2	0	0	0	2	148	21	118	26	113	1670	1367	1352	285	997	137	104	495	325	151	5	7	2	4
ENSBTAG00000049868	0	0	0	0	0	0	0	0	2	2	2	0	0	0	0	0	0	0	0	0	0	0	0	4	4	2	0	2	0	0	0	0	0	0	0	0	0
ENSBTAG00000000501	314	187	286	123	195	174	27	110	3307	1636	1651	327	1431	16	112	16	6	56	357	68	314	46	367	691	667	431	109	462	132	14	27	99	36	33	69	26	38
ENSBTAG00000045525	0	0	0	0	0	0	0	0	0	0	0	0	0	0	0	0	0	0	0	0	0	0	0	0	0	0	0	0	0	0	0	0	0	0	0	0	0
ENSBTAG00000046978	0	0	0	0	0	0	0	0	0	0	0	0	0	0	0	0	0	0	0	0	0	0	0	0	0	0	0	0	0	0	0	0	0	0	0	0	0
ENSBTAG00000054281	0	0	0	0	0	0	0	0	0	0	0	0	0	0	0	0	0	0	0	0	0	0	0	0	0	0	0	0	0	0	0	0	0	0	0	0	0
ENSBTAG00000018697	424	444	468	157	261	225	37	115	468	263	234	50	196	33	158	36	39	168	172	12	136	19	108	668	652	836	146	541	248	29	180	234	163	688	629	627	525
ENSBTAG00000006439	1348	1040	1150	170	223	163	16	84	758	335	311	55	267	12	126	43	22	105	1196	73	458	109	426	1763	2045	1451	457	1403	686	62	366	559	263	2273	2416	1703	1714
ENSBTAG00000048038	0	0	0	0	0	0	0	0	0	0	0	0	0	0	0	0	0	0	0	0	0	0	0	1	0	0	0	0	0	0	0	0	0	0	0	1	0
ENSBTAG00000053537	72	128	51	1	12	7	0	15	16	17	17	0	11	4	10	13	9	20	19	10	60	11	126	153	50	119	6	50	13	2	54	24	26	95	125	110	92
ENSBTAG00000051458	0	0	0	0	0	0	0	0	4	0	0	0	2	0	0	0	0	0	2	0	0	0	0	2	1	3	1	0	1	0	0	0	0	5	0	2	0
ENSBTAG00000019338	6081	7426	6310	1245	1698	1098	159	795	7449	4166	3866	972	4240	133	816	261	155	694	8954	1170	7098	1285	7298	5012	3903	3795	801	2851	4085	390	2765	4208	2994	2418	2211	2123	2428
ENSBTAG00000043696	0	0	0	0	0	0	0	0	0	0	0	0	0	0	0	0	0	0	0	0	0	0	0	0	0	0	0	0	0	0	0	0	0	0	0	0	0
ENSBTAG00000054161	0	2	1	0	0	0	0	0	0	0	0	0	0	0	0	0	0	0	0	0	0	0	0	0	0	0	0	0	0	0	0	0	0	0	0	0	0
ENSBTAG00000035018	4	2	8	46	34	49	6	39	3	10	5	0	0	7	72	8	17	47	5	0	2	0	0	131	89	113	27	102	0	2	6	6	0	6	0	2	0
ENSBTAG00000051018	9	7	3	18	14	6	0	9	24	15	15	2	18	0	1	0	0	0	0	2	5	0	3	5	0	8	2	6	23	2	21	27	15	14	10	9	13
ENSBTAG00000002615	363	291	323	130	170	112	21	85	248	127	152	29	120	32	194	33	27	109	91	29	137	11	165	911	924	518	202	826	333	33	244	274	240	123	122	99	154
ENSBTAG00000051093	0	0	0	0	0	0	0	0	0	0	0	0	0	0	2	0	0	0	0	0	0	0	0	0	0	0	0	0	0	0	0	0	0	0	0	0	0
ENSBTAG00000019552	4301	3828	3275	1446	1722	1139	144	813	10751	6327	5328	1026	4740	57	380	78	39	245	19947	3241	19350	3380	19997	17515	12909	16599	3533	11880	3263	311	2028	3020	2353	2047	1851	2055	1814
ENSBTAG00000019553	0	0	0	0	0	0	0	0	20	30	40	4	17	0	0	0	0	0	0	0	0	0	0	5	8	0	2	9	8	0	0	4	2	0	2	0	1
ENSBTAG00000047757	3	6	1	0	0	2	0	0	2	1	0	1	0	1	0	0	0	2	7	0	4	0	0	1	9	2	0	1	0	0	1	4	0	4	6	0	2
ENSBTAG00000001007	262	180	209	157	122	145	23	125	496	292	240	43	190	63	283	44	76	249	175	15	142	14	134	257	366	240	44	150	299	32	165	196	210	173	280	157	155
ENSBTAG00000046037	1412	736	619	431	383	351	53	242	29957	20234	13155	3155	13334	23	121	23	14	79	945	100	520	159	628	1434	1639	1723	285	1099	5007	827	5219	6577	4144	2434	2714	2432	2210
ENSBTAG00000047169	510	597	537	464	400	506	89	411	1148	729	722	153	584	9	170	38	47	121	446	44	288	68	373	535	539	1004	119	346	608	80	521	764	519	764	693	803	665
ENSBTAG00000045779	851	691	649	1363	1118	1693	296	1254	1973	1006	905	203	822	139	793	193	188	718	686	80	408	72	449	932	863	1091	161	625	1215	178	1143	1462	1136	1100	1069	955	868
ENSBTAG00000045744	139	153	127	53	80	38	2	23	213	108	135	26	88	6	48	7	12	41	35	4	28	1	20	183	149	227	45	126	83	18	109	157	104	247	337	299	267
ENSBTAG00000004291	1020	1113	1232	402	563	323	43	261	1567	982	713	200	733	15	169	38	32	124	637	57	322	56	272	1399	1836	1721	320	1173	536	60	299	677	530	4537	4959	3955	3923
ENSBTAG00000042450	0	0	0	0	0	0	0	0	0	0	0	0	0	0	0	0	0	0	0	0	0	0	0	0	0	0	0	0	0	0	0	0	0	0	0	0	0
ENSBTAG00000046012	252	199	227	22	38	61	2	16	911	872	648	148	624	0	5	0	2	7	103	16	93	11	66	295	420	565	77	273	183	21	128	144	194	307	489	493	525
ENSBTAG00000049833	10521	18213	9756	13665	14341	19319	2498	12154	16936	8794	11470	2619	11087	1085	6801	2193	1333	5373	8064	762	4602	1388	5685	9113	10628	18520	2348	8080	46505	6172	36949	80509	40728	27598	30747	38643	32940
ENSBTAG00000051595	1	0	2	0	0	0	0	0	0	0	0	0	0	0	0	0	0	0	0	0	0	0	0	0	4	1	0	0	0	0	0	0	0	0	0	0	0
ENSBTAG00000043128	0	8	0	2	0	0	0	0	0	0	0	0	0	0	0	0	0	0	0	0	0	0	0	0	0	0	0	0	3	0	0	8	0	0	0	0	2
ENSBTAG00000053038	4	1	3	1	2	1	1	0	2	4	2	0	0	0	3	0	0	4	0	0	4	0	2	12	9	9	0	9	3	3	1	2	2	1	2	5	5
ENSBTAG00000035615	313	566	425	234	233	290	46	189	677	444	415	132	442	28	198	59	65	162	233	25	139	28	141	356	435	588	91	347	334	44	278	279	228	604	517	518	700
ENSBTAG00000047098	4	7	6	21	39	18	6	12	18	8	9	0	8	0	6	0	0	3	0	2	0	0	1	6	2	11	2	9	0	2	2	0	0	1	7	0	0
ENSBTAG00000006034	511	814	642	1006	964	1471	243	1058	1083	795	759	137	680	68	544	122	147	420	436	51	321	62	355	654	1002	1333	190	754	504	84	457	589	513	960	901	1438	1273
ENSBTAG00000006033	1616	1466	1369	9771	7929	12865	2079	9739	6185	3688	3231	745	3346	597	3999	1048	986	3894	1630	166	946	215	1257	1397	1638	2595	377	1338	2795	360	1941	3147	2354	2013	2024	2407	2178
ENSBTAG00000010881	10	23	16	10	21	27	0	10	60	22	30	2	45	0	5	2	2	9	11	0	5	3	11	36	45	80	10	30	7	0	11	23	12	24	28	33	23
ENSBTAG00000010884	365	406	419	230	260	260	46	187	798	544	510	74	482	13	130	42	38	129	375	35	247	24	250	417	502	483	125	431	496	61	293	459	356	338	425	464	396
ENSBTAG00000051760	14	32	8	0	4	0	0	2	11	2	0	0	0	0	0	0	2	8	5	0	2	0	0	8	10	0	0	7	3	0	2	4	16	2	6	0	4
ENSBTAG00000006252	0	8	0	2	5	0	0	2	0	1	1	0	0	0	0	0	0	0	0	0	0	0	0	5	34	11	13	13	2	0	2	0	0	2	0	0	2
ENSBTAG00000052996	24	11	14	95	92	49	20	74	40	43	13	6	18	0	0	2	1	2	0	0	0	0	0	330	583	599	136	339	19	2	21	3	5	0	1	0	2
ENSBTAG00000017184	667	806	826	250	370	253	28	185	1434	804	797	174	745	11	135	47	35	118	401	44	338	77	317	1199	935	897	163	620	681	93	588	768	451	914	853	1049	902
ENSBTAG00000017187	319	920	765	15	25	47	2	11	12	1	10	0	0	8	58	16	33	51	0	0	0	0	0	123	152	60	33	180	114	8	30	74	40	5	14	4	4
ENSBTAG00000008920	4	2	4	2086	1890	2210	328	1502	0	0	0	0	0	390	2226	1048	486	1758	0	0	0	0	0	0	2	0	0	4	0	0	0	1	0	2	1	0	2
ENSBTAG00000007399	5168	6569	5163	1936	2318	2616	302	1635	12174	6459	6762	1266	5555	339	2234	787	498	1755	11422	1390	7893	1556	9914	5700	6009	7206	1196	4143	6458	744	4573	6842	4677	4107	4828	5090	4539
ENSBTAG00000018569	1446	1456	1488	296	428	344	35	259	2392	1402	1430	282	1237	32	282	51	58	215	975	96	537	117	619	1356	1471	1501	286	967	772	115	665	737	564	1147	1269	1136	1034
ENSBTAG00000052761	0	0	0	0	0	0	0	0	0	0	0	0	0	0	0	0	0	0	0	0	0	0	0	0	0	0	0	2	0	0	0	0	0	0	0	0	0
ENSBTAG00000034992	333	367	232	1146	866	1524	232	1106	617	404	457	96	463	59	347	131	99	349	763	64	417	87	473	278	240	400	63	182	539	46	324	706	439	342	366	442	325
ENSBTAG00000021410	367	402	388	289	333	415	46	241	1277	573	672	120	523	22	68	39	14	89	641	58	374	97	406	579	671	822	106	447	509	66	377	473	389	476	427	469	416
ENSBTAG00000038497	0	0	0	0	0	0	0	0	0	0	0	0	0	0	0	0	0	0	0	0	0	0	0	0	0	0	0	0	0	0	0	0	0	0	0	0	0
ENSBTAG00000049471	0	0	0	0	0	0	0	0	0	0	0	0	0	0	0	0	0	0	0	0	0	0	0	0	0	0	0	0	0	0	0	0	0	0	0	1	2
ENSBTAG00000050820	0	0	0	0	0	0	0	0	0	0	0	0	0	0	0	0	0	0	0	0	0	0	0	0	0	0	0	0	0	0	0	0	0	0	0	0	0
ENSBTAG00000011833	97	152	155	127	125	103	21	100	4	6	0	0	12	3	25	4	13	56	12	2	13	1	9	14	9	22	10	25	39	12	62	32	23	55	69	70	66
ENSBTAG00000008388	970	1374	1100	486	618	554	59	413	2125	1189	1180	283	979	59	316	98	81	344	780	71	454	93	443	1460	1507	1709	303	1015	1155	131	818	1094	625	2049	1792	1600	1860
ENSBTAG00000051114	0	0	0	0	0	0	0	0	0	0	0	0	0	0	0	0	0	0	0	0	0	0	0	0	0	0	0	0	0	0	0	0	0	0	0	0	0
ENSBTAG00000040350	338	266	233	96	106	81	18	74	980	512	660	101	489	12	119	61	9	83	348	46	331	47	263	489	536	342	113	413	193	33	186	237	125	710	688	480	519
ENSBTAG00000043402	0	1	0	0	0	0	0	0	0	0	2	0	0	0	0	0	0	0	0	0	0	0	0	1	0	0	0	0	1	0	0	0	0	0	0	0	0
ENSBTAG00000053617	0	0	0	0	0	0	0	0	0	0	0	0	0	0	0	0	0	0	0	0	0	0	0	0	0	0	0	0	0	0	0	0	0	0	0	0	0
ENSBTAG00000009121	1882	1858	1696	610	878	650	93	490	3407	1586	1747	329	1509	109	649	241	145	472	1068	119	772	126	682	2769	2947	2577	510	1837	1426	231	1412	1558	884	3708	3728	3116	2905
ENSBTAG00000052925	0	0	0	0	0	0	0	0	0	0	0	0	0	1	2	0	1	0	0	0	0	0	0	0	0	0	0	0	0	0	0	0	0	0	0	0	0
ENSBTAG00000045715	0	0	0	0	0	0	0	0	7	0	1	0	0	0	0	0	0	2	0	0	0	0	0	0	0	4	0	0	0	0	0	0	0	2	2	4	0
ENSBTAG00000026067	2	18	18	0	10	4	2	12	31	43	34	10	20	0	4	8	2	2	207	17	100	12	97	144	348	301	76	252	54	0	20	24	16	794	1015	1011	1083
ENSBTAG00000018819	11	19	24	2	4	2	0	0	290	150	169	36	164	0	0	4	4	2	2	2	4	0	58	52	43	22	20	48	4	0	4	7	4	10	32	12	2
ENSBTAG00000053513	0	0	0	0	0	0	0	0	0	0	0	0	0	0	0	0	0	0	0	0	0	0	0	0	0	0	0	0	0	0	0	0	0	0	0	0	0
ENSBTAG00000044803	0	0	0	0	0	0	0	0	0	0	0	0	0	0	0	0	0	0	0	0	0	0	0	0	0	0	0	0	0	0	0	0	0	0	0	0	0
ENSBTAG00000046796	0	0	0	0	0	0	0	0	0	0	0	0	0	0	0	0	0	0	0	0	0	0	0	0	0	0	0	0	0	0	0	0	0	0	0	0	0
ENSBTAG00000022399	0	0	0	0	0	0	0	2	6	0	3	0	4	0	0	0	0	0	0	0	0	0	0	33	14	0	0	0	0	0	0	0	0	0	0	1	4
ENSBTAG00000054321	0	0	0	0	0	0	0	0	0	0	0	0	0	0	0	0	0	0	0	0	0	0	0	2	2	0	0	0	0	0	0	0	0	0	0	0	0
ENSBTAG00000054511	0	0	0	0	0	0	0	0	0	0	0	0	0	0	0	0	0	0	0	0	0	0	0	2	0	0	0	0	0	0	0	0	0	0	0	0	0
ENSBTAG00000008763	0	0	0	0	4	0	0	0	2	0	0	0	0	47	276	18	4	27	0	0	0	0	0	0	0	0	0	0	0	0	2	0	0	0	0	0	0
ENSBTAG00000043523	0	0	0	0	0	0	0	0	0	0	0	0	0	0	0	0	0	0	0	0	0	0	0	0	0	0	0	0	0	0	0	0	0	0	0	0	0
ENSBTAG00000000154	8	21	7	3	13	6	3	2	18	19	14	1	8	0	7	3	4	11	5	2	5	0	6	25	14	28	0	18	9	0	13	5	13	12	6	12	11
ENSBTAG00000047701	0	0	0	0	0	0	0	0	0	0	0	0	0	0	0	0	0	0	0	0	0	0	0	0	0	0	0	0	0	0	0	0	0	0	0	0	0
ENSBTAG00000002292	1255	1086	1018	271	363	278	59	302	4536	2906	2729	490	2327	59	241	55	56	224	1292	215	1395	161	862	1024	1336	953	144	608	322	26	185	254	149	991	989	816	825
ENSBTAG00000044746	0	0	0	0	0	0	0	0	0	0	0	0	0	0	0	0	0	0	0	0	0	0	0	0	0	0	0	0	0	0	0	0	0	0	0	0	0
ENSBTAG00000018247	848	783	682	343	431	316	47	271	1404	981	862	165	658	82	532	80	101	375	742	118	597	90	484	935	1111	876	196	682	591	88	405	689	401	490	527	453	375
ENSBTAG00000053073	350	97	56	491	445	204	35	161	335	195	105	39	135	10	94	6	11	73	9	1	0	0	6	885	1151	839	119	524	62	2	13	48	28	29	29	26	17
ENSBTAG00000049022	138	30	43	194	158	91	12	39	120	102	45	8	42	13	43	3	8	17	5	0	1	0	7	382	454	215	53	145	18	1	9	7	14	6	5	8	10
ENSBTAG00000019993	602	119	129	938	734	292	18	175	381	274	126	21	139	26	145	20	27	125	24	2	14	0	22	1714	1647	1034	156	565	100	6	22	50	73	25	39	48	13
ENSBTAG00000010345	3963	1368	839	19	26	20	9	29	29968	24002	20500	4060	17305	14	93	9	8	39	1355	309	1757	314	1109	484	593	383	76	262	162	11	58	124	67	814	1916	481	877
ENSBTAG00000026011	0	0	0	0	0	0	0	0	0	0	0	0	0	0	0	0	0	0	0	0	0	0	0	0	0	0	0	0	0	0	0	0	0	0	0	0	0
ENSBTAG00000002041	540	308	305	150	129	99	8	54	181	168	106	19	93	8	30	4	4	11	497	47	243	53	243	774	1364	1594	299	881	325	26	255	169	139	5155	6864	5468	5421
ENSBTAG00000015354	1220	833	945	374	448	336	46	192	6839	5240	4137	847	3438	29	186	49	25	158	1663	213	1136	187	1032	2633	2773	2567	808	2522	747	86	515	681	511	448	454	348	325
ENSBTAG00000046395	0	0	0	0	0	0	0	0	0	0	0	0	0	0	0	0	0	0	0	0	0	0	0	0	0	0	0	0	0	0	0	0	0	0	0	0	0
ENSBTAG00000013671	4125	6550	4375	2278	2731	2746	413	1939	3548	2561	2529	480	1950	204	1101	348	212	879	2433	290	1851	228	1326	4329	5329	5056	1116	4001	5139	555	3290	5801	3937	4830	5114	5091	4279
ENSBTAG00000004962	872	618	755	191	310	198	21	135	653	460	222	45	309	48	169	39	24	92	204	23	155	13	133	1011	1252	713	221	720	518	64	291	347	257	578	783	413	450
ENSBTAG00000019061	991	887	908	140	281	162	35	162	381	223	125	34	162	10	71	10	26	31	242	23	201	21	165	988	1360	613	247	823	727	65	369	543	430	1698	2058	1222	1201
ENSBTAG00000006838	1915	952	666	8743	6467	9511	1824	8856	7795	5276	4575	900	3907	213	1685	345	422	1734	4181	411	2590	512	3004	924	979	1322	245	876	2963	401	2350	3003	2329	930	1050	1059	936
ENSBTAG00000034712	12	19	19	321	195	502	90	371	19	46	33	5	24	0	4	4	0	3	19	4	2	4	20	19	21	43	2	18	35	0	19	44	39	46	30	42	43
ENSBTAG00000019885	69	68	56	23	30	26	6	39	48	29	39	0	21	0	4	1	0	6	38	4	28	4	18	64	100	73	8	59	18	2	19	21	22	89	87	110	64
ENSBTAG00000016263	73	131	114	193	189	290	30	163	202	153	106	24	93	10	44	3	10	39	65	14	38	12	53	111	118	153	20	74	135	11	68	120	95	122	137	116	150
ENSBTAG00000051880	47	87	91	129	54	108	15	101	171	56	113	26	64	14	27	8	2	28	120	6	47	26	93	212	154	143	32	120	122	9	83	138	85	123	86	126	141
ENSBTAG00000052042	15	15	11	19	19	17	4	5	27	16	17	1	11	1	10	1	0	5	16	1	11	0	14	32	16	27	9	21	16	0	17	29	11	16	20	12	14
ENSBTAG00000014770	0	0	2	0	0	0	0	0	0	0	0	0	0	0	0	0	0	0	0	0	0	0	0	0	0	0	0	0	0	0	0	0	0	0	0	0	0
ENSBTAG00000014771	521	1125	735	265	341	371	50	226	570	350	291	79	371	16	190	52	41	155	479	44	327	83	321	678	1055	1598	213	699	317	42	239	344	149	1337	1252	924	915
ENSBTAG00000048581	2	1	2	0	0	0	0	2	4	0	0	0	0	0	0	0	0	0	1	0	0	0	0	3	2	0	0	17	4	0	1	5	2	4	4	0	23
ENSBTAG00000049641	188	184	185	148	133	99	31	108	367	291	143	55	168	21	145	45	49	164	172	24	113	7	102	274	278	256	57	243	220	33	185	248	172	231	278	268	251
ENSBTAG00000021189	2	11	6	0	0	4	0	0	0	0	0	0	0	0	23	0	0	4	0	0	0	0	0	1	2	0	0	0	0	0	0	0	0	0	0	0	0
ENSBTAG00000047994	0	0	0	0	0	0	0	0	0	0	0	0	0	0	0	0	0	0	0	0	0	0	0	0	0	0	0	0	0	0	0	0	0	0	0	0	0
ENSBTAG00000051885	0	0	0	0	0	0	0	0	0	0	0	0	0	0	0	0	0	0	0	0	0	0	0	0	0	0	0	0	0	0	0	0	0	0	0	0	0
ENSBTAG00000046476	0	0	6	0	0	5	0	2	172	185	46	8	43	0	2	0	0	0	68	13	34	10	45	14	12	7	1	4	12	2	4	9	6	0	0	0	0
ENSBTAG00000054512	6	12	1	0	0	4	0	0	369	285	122	14	119	0	7	0	0	0	7	0	5	2	15	104	50	54	8	26	50	0	11	15	12	2	6	6	0
ENSBTAG00000048126	0	0	0	0	0	0	0	0	0	0	0	0	0	0	0	0	0	0	0	0	0	0	0	0	0	0	0	0	0	0	0	0	0	0	0	0	0
ENSBTAG00000051996	0	0	0	0	0	0	0	0	0	0	0	0	0	0	2	0	0	0	0	0	0	0	0	0	0	0	0	0	0	0	0	0	0	0	0	0	0
ENSBTAG00000054675	9	5	8	13	6	16	1	10	2	3	2	0	3	0	2	0	0	3	0	0	0	0	0	9	5	6	1	3	6	2	2	12	2	13	7	4	3
ENSBTAG00000049858	0	0	0	0	0	0	0	0	0	0	0	0	0	0	0	0	0	0	0	0	0	0	0	0	0	0	0	0	0	0	0	0	0	0	0	0	0
ENSBTAG00000024210	0	0	0	0	0	0	0	0	0	0	0	0	0	0	2	0	0	0	0	0	0	0	0	0	0	0	0	0	0	0	0	0	0	0	0	0	0
ENSBTAG00000044767	0	0	0	0	0	0	0	0	0	0	0	0	0	0	0	0	0	0	0	0	0	0	0	0	0	0	0	0	0	0	0	0	0	0	0	0	0
ENSBTAG00000007647	0	0	0	0	0	0	0	0	0	6	0	0	0	0	0	0	0	0	0	0	0	0	0	0	0	0	0	0	0	0	0	0	0	0	0	0	0
ENSBTAG00000051508	5	9	0	4	5	13	0	0	4	4	9	2	2	0	2	0	2	0	0	0	2	0	2	6	13	0	0	2	2	0	0	6	4	11	13	13	6
ENSBTAG00000019652	187	124	202	105	83	55	9	105	478	251	243	67	238	26	84	20	34	97	348	27	172	21	167	866	966	957	159	636	504	65	459	482	403	3667	2846	2845	2781
ENSBTAG00000007344	3	2	6	0	4	0	0	0	6	18	4	0	4	0	0	0	0	0	2	2	0	0	3	0	0	1	2	4	0	0	2	0	0	5	2	8	2
ENSBTAG00000004131	1379	1113	1165	715	678	669	101	571	4915	2544	2201	466	1783	91	417	131	106	404	5609	525	2752	535	2859	1762	1891	2068	292	1143	1064	132	717	1130	712	1872	1850	1988	1904
ENSBTAG00000014088	390	68	62	0	4	0	2	0	155	116	104	19	67	0	10	6	0	0	343	84	404	27	378	107	89	39	14	57	41	4	41	54	27	182	211	105	104
ENSBTAG00000042799	0	0	0	0	0	0	0	0	0	0	0	0	0	0	0	0	0	0	0	0	0	0	0	0	0	0	0	0	0	0	0	0	0	0	0	0	0
ENSBTAG00000049807	0	0	0	3	0	0	0	0	7	14	15	0	0	0	2	2	4	12	1	0	15	0	0	9	12	22	6	11	2	1	0	0	0	4	12	20	29
ENSBTAG00000021344	0	0	0	0	0	0	0	0	0	0	0	0	0	0	0	0	0	0	0	0	0	0	0	0	0	0	0	0	0	0	0	0	0	0	0	0	0
ENSBTAG00000026063	0	1	0	0	0	0	0	0	1	0	0	0	0	0	0	0	0	0	0	0	0	0	0	0	0	0	0	0	0	0	0	0	0	0	0	0	0
ENSBTAG00000020644	652	383	478	1509	2135	1607	242	1130	10652	10584	8730	1256	5279	38	235	27	29	113	252	34	326	34	285	4164	3188	2064	382	1228	672	73	442	433	170	81	130	66	77
ENSBTAG00000036908	0	0	0	0	0	0	0	2	0	0	0	0	0	0	0	0	0	0	0	0	0	0	0	0	0	0	0	0	0	0	0	0	0	0	0	0	0
ENSBTAG00000020406	2425	2820	2651	173	161	97	13	78	3371	2649	2418	419	1826	18	169	34	42	200	1846	173	1126	531	1820	2519	2410	1543	323	1115	499	40	338	561	353	4	18	16	22
ENSBTAG00000054781	0	0	0	0	0	0	0	0	2	0	0	0	0	0	0	0	0	0	0	0	0	0	0	0	1	0	0	0	0	0	0	0	0	0	0	0	0
ENSBTAG00000030507	2	0	0	0	1	0	0	1	2	0	4	0	1	0	0	0	0	0	2	2	3	0	2	2	0	7	0	0	1	0	0	4	2	1	2	1	1
ENSBTAG00000053184	0	0	0	0	0	0	0	0	0	0	0	0	0	0	0	0	0	0	0	0	0	0	0	0	0	0	0	0	0	0	0	0	0	0	0	0	0
ENSBTAG00000029978	0	2	0	0	0	0	0	0	0	0	0	0	0	0	0	0	0	0	0	0	0	0	0	0	0	0	0	0	0	0	0	0	0	0	0	2	0
ENSBTAG00000030059	0	0	0	0	0	0	0	0	0	0	0	0	0	0	0	0	0	0	0	0	0	0	0	0	0	0	0	0	0	0	0	0	0	0	0	0	0
ENSBTAG00000029785	0	0	0	0	0	0	0	0	0	0	0	0	0	0	0	0	0	0	0	0	0	0	0	0	0	0	0	0	0	0	0	0	0	0	0	0	0
ENSBTAG00000029910	0	0	0	0	0	0	0	0	0	0	0	0	0	0	0	0	0	0	0	0	0	0	0	0	0	0	0	0	0	0	0	0	0	0	0	0	0
ENSBTAG00000029973	0	0	0	0	0	0	0	0	0	0	0	0	0	0	0	0	0	0	0	0	0	0	0	0	0	0	0	0	0	0	0	0	0	0	0	0	0
ENSBTAG00000029781	0	0	0	0	0	0	0	0	0	0	0	0	0	0	0	0	0	0	0	0	0	0	0	0	0	0	0	0	0	0	0	0	0	0	0	0	0
ENSBTAG00000036349	14	7	7	20	10	16	0	8	121	85	57	18	81	0	0	0	0	0	6	0	2	0	2	21	36	55	8	22	7	4	8	12	6	16	30	18	28
ENSBTAG00000015196	250	217	234	154	163	101	14	93	840	426	373	89	359	16	81	21	23	83	218	40	121	26	137	496	571	395	99	476	310	42	235	331	202	801	890	653	642
ENSBTAG00000052441	0	0	0	0	0	0	0	0	0	0	0	0	0	0	0	0	0	0	0	0	0	0	0	0	0	0	0	0	0	0	0	0	0	0	0	0	0
ENSBTAG00000014685	1713	1368	988	3564	3181	3904	593	3189	2904	1694	1534	299	1387	200	951	182	288	977	3712	241	1472	510	2552	2290	2471	3324	413	1634	3040	438	2344	3983	2866	2015	2852	2185	2269
ENSBTAG00000043695	0	0	0	0	4	0	0	2	4	0	11	2	10	2	0	0	0	0	4	0	0	0	0	0	3	0	0	0	0	0	0	2	0	0	0	0	1
ENSBTAG00000029807	0	0	0	0	0	0	0	0	2	0	5	0	4	0	0	0	0	0	0	0	0	0	0	0	0	0	0	0	0	0	0	0	0	0	0	0	2
ENSBTAG00000029885	0	0	0	0	0	0	0	0	1	0	1	0	0	0	0	0	0	0	0	0	0	0	0	1	0	0	0	0	0	0	0	0	0	0	0	0	0
ENSBTAG00000030024	1	0	0	0	0	0	0	0	1	0	0	0	0	0	0	0	0	0	0	0	0	0	0	0	0	0	0	0	0	0	0	0	0	0	0	0	0
ENSBTAG00000030084	0	0	0	0	0	0	0	0	0	0	2	0	0	0	0	0	0	0	0	0	0	0	0	0	2	0	0	0	0	0	0	0	0	0	0	0	0
ENSBTAG00000036419	0	0	0	0	0	0	0	0	0	0	0	0	0	0	0	0	0	0	0	0	0	0	0	0	0	0	0	0	0	0	0	0	0	0	0	0	0
ENSBTAG00000006293	0	0	0	2	2	0	0	0	3	2	0	4	6	0	0	0	0	0	0	0	0	0	0	2	0	0	0	0	0	0	0	0	0	0	0	0	0
ENSBTAG00000001886	563	432	397	190	269	191	42	159	1174	701	578	102	504	8	68	20	14	54	327	33	252	36	193	1035	1162	649	282	752	723	81	618	650	484	742	1017	724	683
ENSBTAG00000044891	0	0	0	0	0	0	0	0	4	0	0	0	1	0	0	0	0	0	0	0	0	2	0	8	3	0	2	0	0	0	0	2	0	7	4	0	4
ENSBTAG00000045425	0	0	0	0	0	0	0	0	0	0	0	0	0	0	0	0	0	0	0	0	0	0	0	0	0	0	0	0	0	0	0	0	0	0	0	0	0
ENSBTAG00000042714	0	0	0	0	0	0	0	0	0	0	0	0	0	0	0	0	0	0	0	0	0	0	0	0	0	0	0	0	0	0	0	0	0	0	0	0	0
ENSBTAG00000053525	5	2	6	2	9	8	0	7	3	0	0	0	4	0	2	0	0	9	0	1	1	0	3	2	4	0	1	6	0	0	0	2	0	6	2	0	0
ENSBTAG00000050804	0	0	0	0	0	0	0	0	0	0	0	0	0	0	0	0	0	0	0	0	0	0	0	0	0	0	0	0	0	0	0	0	0	0	0	0	0
ENSBTAG00000013922	211	231	206	432	388	646	84	385	1027	661	450	120	583	50	367	84	58	234	702	100	639	79	570	327	253	272	41	193	157	17	112	161	138	122	127	122	133
ENSBTAG00000048173	763	347	339	901	1124	758	89	444	20340	15344	14539	2872	12284	11	119	17	9	67	659	175	1045	68	503	650	828	937	162	538	41	0	37	48	20	87	108	149	108
ENSBTAG00000054025	2	0	0	0	0	0	0	0	0	0	0	0	0	0	0	0	0	0	0	0	0	0	0	0	1	0	0	0	0	0	0	0	0	0	0	0	0
ENSBTAG00000039890	412	255	258	163	186	221	27	131	256	253	128	25	130	10	71	25	18	116	51	10	84	5	82	184	127	156	17	104	157	16	90	101	87	58	79	75	61
ENSBTAG00000052285	0	0	2	0	0	0	0	0	0	0	2	0	0	0	0	0	0	0	0	0	0	0	0	0	0	0	0	0	0	0	0	0	0	0	0	0	0
ENSBTAG00000049298	10	9	15	0	1	0	0	0	0	0	0	0	2	0	0	0	0	4	2	1	0	0	0	0	0	0	0	0	0	0	0	0	0	0	0	0	0
ENSBTAG00000019546	0	0	0	0	0	0	0	0	36	16	20	4	7	0	0	0	0	0	0	0	0	0	0	0	0	1	0	0	0	0	0	0	0	0	2	0	0
ENSBTAG00000047954	261	203	234	264	251	259	54	247	405	299	246	39	174	18	195	19	26	127	135	19	93	14	105	351	412	302	67	260	298	45	257	299	212	421	461	398	467
ENSBTAG00000048653	0	0	0	0	0	0	0	0	0	0	0	0	0	0	0	0	0	0	0	0	0	0	0	0	0	0	0	0	1	0	2	0	0	2	0	0	0
ENSBTAG00000018090	11	4	6	4	1	0	0	0	0	0	0	0	4	0	0	0	2	0	0	0	2	0	0	0	0	0	3	2	2	0	0	3	0	6	0	0	1
ENSBTAG00000050385	78	118	134	65	77	91	26	85	195	126	112	15	104	18	131	13	30	131	85	3	49	8	53	173	136	282	47	166	108	4	35	91	59	454	347	238	202
ENSBTAG00000047939	58	61	73	49	31	31	5	17	79	101	45	7	55	3	22	6	4	30	37	7	23	4	40	84	55	117	26	108	55	3	24	39	37	221	105	156	163
ENSBTAG00000049183	89	31	62	21	14	26	6	29	55	59	74	11	30	2	6	2	0	7	4	0	12	0	3	103	72	140	13	65	8	0	9	16	7	22	53	19	27
ENSBTAG00000045569	0	0	0	0	0	0	0	0	0	0	0	0	0	0	0	0	0	0	0	0	0	0	0	0	1	0	0	0	4	0	3	8	2	2	0	8	4
ENSBTAG00000049802	68	54	45	28	61	29	4	22	22	12	7	3	7	2	26	3	1	42	15	1	11	2	6	65	135	66	27	101	23	0	16	20	11	104	57	78	69
ENSBTAG00000052733	0	0	5	0	0	2	0	0	10	0	4	0	1	1	1	0	0	0	1	0	2	0	3	4	3	1	1	2	7	2	6	2	2	3	5	1	0
ENSBTAG00000054899	39	47	122	43	33	23	3	48	71	112	83	43	62	5	18	2	4	30	24	2	12	0	18	86	120	26	4	119	33	6	18	23	13	48	52	18	31
ENSBTAG00000050158	552	744	1151	711	652	931	193	781	123	90	103	20	44	367	2089	559	973	3901	19	6	28	0	23	589	665	424	115	449	238	35	163	294	111	220	219	179	158
ENSBTAG00000014170	508	431	433	163	168	255	29	121	196	128	70	29	83	5	48	5	11	53	141	5	96	11	49	336	345	267	80	230	117	17	91	163	60	280	381	460	345
ENSBTAG00000005616	0	0	0	0	0	0	0	0	0	0	0	0	0	0	0	0	0	0	0	0	0	0	0	0	0	0	0	0	0	0	0	0	0	0	0	0	0
ENSBTAG00000054942	342	175	212	116	170	171	21	89	219	125	133	60	120	8	101	39	44	90	181	12	57	16	107	455	312	573	57	248	168	2	72	100	61	117	316	255	120
ENSBTAG00000017843	0	6	6	0	0	0	0	0	5	11	0	4	2	0	0	1	0	0	11	0	1	0	2	7	2	12	0	8	8	2	4	12	10	52	32	19	12
ENSBTAG00000017850	462	414	415	324	443	528	58	318	480	270	151	38	140	65	365	94	50	307	570	61	383	46	371	832	849	608	148	512	155	22	110	169	106	1123	1462	1034	1139
ENSBTAG00000042185	0	0	0	0	0	0	0	0	0	0	0	0	0	0	0	0	0	0	0	0	0	0	0	0	0	0	0	0	0	0	0	0	0	0	0	0	0
ENSBTAG00000049141	0	0	0	0	0	0	0	0	0	0	0	0	0	0	0	0	0	0	0	0	0	0	0	0	0	0	0	0	0	0	0	0	0	0	1	0	0
ENSBTAG00000022373	0	5	3	2	0	0	0	1	0	6	1	0	2	0	0	0	0	0	2	0	5	0	3	6	29	12	2	15	2	0	1	0	0	4	11	4	8
ENSBTAG00000039388	0	2	0	0	0	0	0	0	2	0	0	0	0	0	0	0	0	0	0	0	4	0	0	0	1	0	0	0	0	0	0	0	0	0	0	0	0
ENSBTAG00000050383	0	0	0	0	0	0	0	0	0	0	0	0	0	0	0	0	0	0	0	0	0	0	0	0	0	0	0	0	0	0	0	0	0	0	0	0	0
ENSBTAG00000042114	0	0	0	0	0	0	0	0	0	0	0	0	0	0	0	0	0	0	0	0	0	0	0	0	0	0	0	0	0	0	0	0	0	0	0	0	0
ENSBTAG00000051480	10	11	27	93	131	125	16	92	56	17	24	9	11	59	139	51	46	156	0	0	1	0	2	48	72	34	20	55	4	0	2	1	5	2	2	11	5
ENSBTAG00000029864	0	0	0	0	0	0	0	0	0	0	0	0	0	0	0	0	0	0	0	0	0	0	0	0	0	0	0	0	0	0	0	0	0	0	0	0	0
ENSBTAG00000019221	0	0	0	0	0	0	0	0	0	0	2	0	0	0	0	0	0	0	0	0	0	0	0	0	0	0	0	0	0	0	0	0	0	0	0	0	0
ENSBTAG00000000567	0	0	0	0	0	0	0	0	0	0	0	0	0	0	0	0	0	0	0	0	0	0	0	0	0	0	0	0	0	0	0	0	0	0	0	0	0
ENSBTAG00000052795	0	0	0	0	0	0	0	0	2	7	9	21	29	0	1	0	0	0	1207	122	1000	105	1080	0	0	0	0	0	0	0	0	2	0	0	0	0	0
ENSBTAG00000004007	0	0	2	0	0	0	0	0	54	6	13	6	21	0	0	0	0	0	0	0	4	0	0	3	0	0	0	0	0	0	0	0	0	21	32	16	17
ENSBTAG00000055076	0	0	0	0	0	0	0	0	0	0	0	0	0	0	0	0	0	0	0	0	0	0	0	0	0	0	0	0	0	0	0	0	0	0	0	0	0
ENSBTAG00000016484	186	145	139	24	36	36	8	34	847	360	294	78	417	6	23	5	10	25	932	132	768	154	761	266	349	282	26	182	129	12	74	98	76	360	312	254	322
ENSBTAG00000029950	0	0	0	0	0	0	0	0	0	0	0	0	0	0	0	0	0	0	0	0	0	0	0	0	0	0	0	0	0	0	0	0	0	0	0	0	0
ENSBTAG00000051471	0	0	0	0	0	0	0	0	0	0	0	0	0	0	0	0	0	0	0	0	0	0	0	0	0	0	0	0	0	0	0	0	0	0	0	0	0
ENSBTAG00000047089	544	742	578	549	563	743	104	425	930	497	437	89	408	79	300	84	51	231	306	37	241	33	252	652	625	849	137	404	719	91	499	799	442	739	675	726	653
ENSBTAG00000047819	0	0	0	0	0	0	0	0	0	0	0	0	0	0	0	0	0	0	0	0	0	0	0	0	0	0	0	0	0	0	0	0	0	0	0	0	0
ENSBTAG00000036144	0	0	0	0	0	0	0	0	0	0	0	0	0	0	0	0	0	0	0	0	0	0	0	0	0	0	0	0	0	0	0	0	0	0	0	0	0
ENSBTAG00000051732	0	0	0	2	0	0	0	0	2	0	2	0	0	0	0	0	0	0	0	0	0	0	0	5	4	18	8	26	0	0	2	0	2	0	0	0	0
ENSBTAG00000055177	0	0	0	0	0	0	0	0	0	0	0	0	0	0	0	0	0	0	0	0	0	0	0	0	0	0	0	0	0	0	0	0	0	0	0	0	0
ENSBTAG00000018098	2	6	6	0	0	1	0	0	20	24	21	8	7	0	2	0	0	0	0	0	0	0	0	0	5	3	0	6	2	0	0	0	0	0	2	4	0
ENSBTAG00000052701	0	0	0	0	0	0	0	0	0	0	0	0	0	0	0	0	0	0	0	0	0	0	0	0	0	0	0	0	0	0	0	0	0	0	0	0	0
ENSBTAG00000050218	0	0	0	0	0	0	0	0	0	0	0	0	0	0	0	0	0	0	0	0	0	0	0	0	0	0	0	0	0	0	0	0	0	0	0	0	0
ENSBTAG00000049311	0	0	0	0	0	0	0	0	0	0	0	0	0	0	0	0	0	0	0	0	0	0	0	0	0	0	0	0	0	0	0	0	0	0	2	0	2
ENSBTAG00000043188	0	0	0	0	0	0	0	0	0	0	0	0	0	0	0	0	0	0	0	0	0	0	0	0	0	0	0	0	0	0	0	0	0	0	0	0	0
ENSBTAG00000011780	78	17	39	0	0	0	0	2	35	44	13	8	22	0	0	0	0	0	0	0	0	0	0	1	0	0	0	4	0	0	0	0	0	0	0	0	0
ENSBTAG00000000997	0	0	0	0	0	0	0	0	0	0	0	0	0	0	0	0	0	0	0	0	0	0	0	0	0	0	0	0	0	0	0	0	0	2	3	4	2
ENSBTAG00000019009	0	0	0	0	0	0	0	0	0	0	0	0	0	0	0	0	0	0	0	0	0	0	0	0	0	0	0	0	0	0	0	0	0	0	0	0	0
ENSBTAG00000045940	0	0	0	0	0	1	0	0	0	0	0	0	0	0	0	0	0	0	0	0	0	0	0	1	0	18	0	8	2	0	0	0	0	0	0	0	2
ENSBTAG00000054420	0	0	0	0	0	0	0	0	0	0	0	0	0	0	0	0	0	0	0	0	0	0	0	0	0	0	0	0	0	0	0	0	0	0	0	0	0
ENSBTAG00000039377	1	0	0	4	1	2	0	6	1	0	0	0	0	0	1	0	0	1	0	0	0	0	0	1	7	0	0	7	0	0	0	3	6	0	0	1	0
ENSBTAG00000055043	1	2	4	6	8	0	0	0	4	0	1	0	0	0	0	0	0	2	0	0	2	1	0	12	18	1	6	11	0	0	2	4	8	0	2	0	0
ENSBTAG00000045394	0	0	0	0	0	0	0	0	0	0	0	0	0	0	0	0	0	0	0	0	0	0	0	0	0	0	0	0	0	0	2	0	0	0	0	0	0
ENSBTAG00000016940	0	0	0	0	0	0	0	0	0	0	0	0	0	0	0	0	0	0	0	0	0	0	0	0	0	0	0	0	0	0	0	0	0	0	0	0	0
ENSBTAG00000045773	0	0	0	0	0	0	0	0	0	0	0	0	0	0	0	0	0	0	0	0	0	0	0	0	0	0	0	0	0	0	0	0	0	0	0	0	0
ENSBTAG00000051571	0	0	0	0	0	0	0	0	0	0	0	0	0	0	0	0	0	0	0	0	0	0	0	0	0	0	0	0	0	0	0	0	0	0	0	0	0
ENSBTAG00000049708	0	0	0	0	0	0	0	0	0	0	0	0	0	0	0	0	0	0	0	0	0	0	0	0	0	0	0	0	0	0	0	0	0	0	0	0	0
ENSBTAG00000043320	0	0	0	0	0	0	0	0	0	0	0	0	0	0	0	0	0	0	0	0	0	0	0	0	0	0	0	0	0	0	0	0	0	0	0	0	0
ENSBTAG00000052973	0	0	0	0	0	0	0	0	1	0	0	0	0	0	0	0	0	0	0	0	0	0	0	0	0	0	0	0	0	0	0	0	0	0	0	0	0
ENSBTAG00000012552	697	1010	874	299	406	329	61	298	1908	917	1099	196	870	26	145	54	50	198	934	116	692	153	630	1696	1630	1365	308	1148	753	101	591	783	521	1523	1482	1492	1368
ENSBTAG00000054960	0	0	0	0	0	0	0	0	0	0	0	0	0	0	0	0	0	0	0	0	0	0	0	0	0	0	0	0	0	0	0	0	0	0	0	0	0
ENSBTAG00000054192	0	0	0	0	0	0	0	0	0	0	0	0	0	0	0	0	0	0	0	0	0	0	0	0	0	0	0	0	0	0	0	0	0	0	0	0	0
ENSBTAG00000034045	0	0	0	2	0	11	0	8	0	2	0	0	0	0	2	0	0	0	0	0	0	2	0	0	0	0	0	1	0	0	0	0	0	0	0	0	6
ENSBTAG00000020750	31	70	108	2	4	2	2	4	22	16	6	4	13	0	0	2	2	2	14	2	6	0	2	77	51	31	6	28	4	0	0	4	0	285	444	281	272
ENSBTAG00000018311	0	0	0	0	0	0	0	0	0	0	0	0	0	0	0	0	0	0	0	0	0	0	0	0	0	0	0	0	0	0	0	0	0	0	0	0	0
ENSBTAG00000011056	1299	840	969	399	546	394	57	274	1697	1043	883	161	654	25	97	30	28	130	309	64	309	22	228	2193	1773	609	368	1307	1860	154	1028	1453	1090	427	668	335	374
ENSBTAG00000049027	0	0	0	0	0	0	0	0	0	0	1	0	0	0	0	0	0	0	0	0	0	0	0	0	2	0	0	0	0	0	0	0	0	0	0	0	0
ENSBTAG00000050778	0	0	0	0	0	0	0	0	0	0	0	0	0	0	0	0	0	0	0	0	0	0	0	0	0	0	0	0	0	0	0	0	0	0	0	0	0
ENSBTAG00000006818	707	1021	854	460	587	568	79	387	1131	708	586	140	640	81	532	151	159	446	585	71	479	55	427	859	925	976	194	687	761	109	615	789	678	623	753	588	611
ENSBTAG00000046565	0	0	0	0	0	0	0	0	0	0	0	0	0	0	0	0	0	0	0	0	0	0	0	0	0	0	0	0	0	0	0	0	0	0	0	0	0
ENSBTAG00000050724	0	0	0	0	0	0	0	0	0	0	0	0	0	0	0	0	0	0	0	0	0	0	0	2	2	0	0	2	0	0	0	0	0	0	0	2	0
ENSBTAG00000048623	0	0	0	0	0	0	0	0	0	0	0	0	0	0	0	0	0	0	0	0	0	0	0	0	0	0	0	0	0	0	0	0	0	0	0	0	0
ENSBTAG00000055194	0	0	0	0	0	0	0	0	0	0	0	0	0	0	0	0	0	0	0	0	0	0	0	0	0	0	0	0	0	0	0	0	0	0	0	0	0
ENSBTAG00000048505	0	0	0	0	0	0	0	0	0	0	0	0	0	0	0	0	0	0	0	0	0	0	0	0	0	0	0	0	0	0	0	0	0	0	0	0	0
ENSBTAG00000053064	2	0	0	0	0	0	0	0	0	0	1	0	0	0	0	0	0	0	0	0	0	0	0	1	0	0	0	4	0	0	0	0	0	2	0	2	0
ENSBTAG00000055100	0	0	0	0	0	0	0	0	0	0	0	0	0	0	0	0	0	0	0	0	0	0	0	0	0	0	0	0	0	0	0	0	0	0	0	0	0
ENSBTAG00000021713	113	85	90	113	139	130	8	89	129	75	38	21	69	18	154	33	58	219	22	8	43	4	16	226	272	201	72	178	15	3	14	48	17	170	250	194	212
ENSBTAG00000014138	201	188	275	124	166	150	32	112	743	385	369	89	399	41	268	104	89	340	218	22	118	32	142	332	441	459	73	278	185	24	157	266	135	354	509	407	453
ENSBTAG00000009657	426	442	420	376	467	402	86	340	1210	797	684	123	518	111	597	98	141	556	391	48	301	50	213	971	1167	580	146	590	746	83	639	750	593	966	1199	992	742
ENSBTAG00000052670	3984	2772	3878	1716	2147	2151	293	1498	2213	1864	1171	263	1149	270	1561	323	258	1107	864	146	941	93	729	1901	2219	1726	447	1600	533	57	295	430	362	815	1064	846	806
ENSBTAG00000005150	425	141	175	206	105	316	53	240	384	210	129	39	232	2	19	0	3	14	235	33	192	36	140	217	119	37	10	39	237	53	307	211	115	126	79	88	103
ENSBTAG00000005950	0	0	4	0	0	0	0	0	0	0	0	0	0	2	0	0	0	2	0	0	0	0	0	0	0	0	0	0	0	0	0	0	0	0	0	0	0
ENSBTAG00000006296	1265	953	876	673	728	669	97	424	4867	2477	2396	477	2134	174	1095	376	270	1123	1049	81	626	164	683	1822	1603	1859	329	1154	1921	224	1365	1910	1351	1738	1698	1735	1439
ENSBTAG00000049423	0	0	0	0	0	0	0	0	0	0	0	0	0	0	0	0	0	0	0	0	0	0	0	0	0	0	0	0	0	0	0	0	0	0	0	0	0
ENSBTAG00000050658	0	0	0	0	0	0	0	0	0	0	0	0	0	0	0	0	0	0	0	0	0	0	0	0	2	2	0	0	0	0	0	0	0	0	0	0	0
ENSBTAG00000054065	0	0	0	0	1	0	0	0	0	0	0	0	0	0	0	0	0	0	0	0	0	0	0	0	0	0	0	8	0	0	1	0	0	0	0	0	0
ENSBTAG00000050821	0	0	0	0	0	0	0	0	0	0	0	0	0	0	0	0	0	0	0	0	0	0	0	0	0	0	0	0	0	0	0	0	0	0	0	0	0
ENSBTAG00000009775	21	31	38	34	67	34	4	39	378	299	180	13	141	1	7	4	1	2	75	29	161	9	127	168	186	59	38	163	61	12	55	69	70	33	34	15	53
ENSBTAG00000006820	0	0	2	0	0	3	0	0	0	0	0	0	0	0	0	0	0	0	0	0	0	0	0	0	2	2	4	6	0	0	0	0	0	0	8	0	2
ENSBTAG00000020725	0	0	4	0	2	7	0	2	0	0	0	0	0	0	0	0	0	0	6	0	6	0	11	1	18	11	8	14	0	0	0	0	0	0	4	22	20
ENSBTAG00000013548	111	136	232	0	2	8	2	10	159	86	69	12	104	2	26	6	6	25	4	2	14	0	7	394	247	301	121	395	41	4	30	32	21	13	30	15	17
ENSBTAG00000048241	1	4	6	0	0	0	0	0	1	2	0	0	4	0	0	0	0	0	0	0	0	0	0	4	2	14	3	3	2	0	0	0	0	0	0	0	0
ENSBTAG00000029818	0	0	2	0	0	0	0	0	1	0	0	0	0	0	0	0	0	0	0	0	0	0	0	0	3	0	1	4	0	0	0	1	0	0	0	0	0
ENSBTAG00000029889	0	2	0	0	0	0	0	0	0	0	0	0	4	0	0	0	0	0	0	0	0	0	0	1	0	0	0	0	0	0	0	0	0	0	0	0	0
ENSBTAG00000012748	0	0	0	0	0	0	0	0	0	1	0	0	0	0	0	0	0	0	0	0	0	0	0	0	0	0	0	0	0	0	0	0	0	0	0	0	0
ENSBTAG00000006691	4	0	7	12	23	16	0	14	5	4	0	0	2	0	11	2	0	5	0	0	0	0	0	4	8	3	0	2	1	0	0	0	1	0	2	0	1
ENSBTAG00000029875	0	0	0	0	0	0	0	0	0	0	0	0	0	0	0	0	0	0	0	0	0	0	0	0	0	0	0	0	0	0	0	0	0	0	0	0	0
ENSBTAG00000030104	0	0	0	0	0	0	0	0	0	0	0	0	0	0	0	0	0	0	0	0	0	0	0	0	0	0	0	0	0	0	0	0	0	0	0	0	0
ENSBTAG00000030106	0	0	0	0	0	0	0	0	0	0	0	0	0	0	0	0	0	0	0	0	0	0	0	0	0	0	0	0	0	0	0	0	0	0	0	0	0
ENSBTAG00000048998	0	0	0	0	0	0	0	0	0	0	0	0	0	0	0	0	0	0	0	0	0	0	0	0	0	0	0	0	0	0	0	0	0	0	0	0	0
ENSBTAG00000013002	8	0	1	0	0	0	0	0	2	0	0	0	0	0	0	0	0	0	0	0	0	4	0	11	5	0	1	2	4	0	0	4	4	0	0	0	0
ENSBTAG00000050384	0	0	0	0	0	0	0	0	0	0	0	0	0	0	0	0	0	0	0	0	0	0	0	0	0	0	0	0	0	0	0	0	0	0	0	0	0
ENSBTAG00000007844	757	816	756	1230	1255	1691	322	1386	1669	890	813	168	805	51	359	107	91	372	833	136	717	161	671	1367	1331	1473	276	972	982	120	734	1071	769	814	903	897	735
ENSBTAG00000009231	1130	525	396	223	300	200	26	150	2898	1228	770	160	769	16	64	12	17	33	6247	1044	6015	1009	6013	941	957	799	213	644	3722	541	3149	4444	3498	625	825	637	653
ENSBTAG00000005776	16	37	32	13	44	10	1	4	91	74	57	4	36	2	4	4	0	3	159	12	88	4	25	269	162	161	79	171	8908	1618	10205	14584	9136	17	19	4	9
ENSBTAG00000048506	25	23	27	24	8	22	10	7	58	42	23	14	41	0	2	0	2	5	35	6	13	2	34	35	20	17	6	22	15	0	9	4	15	99	59	31	45
ENSBTAG00000049615	347	290	278	147	161	180	23	127	673	297	351	52	261	4	72	33	20	79	274	34	170	34	248	417	412	304	119	366	307	45	203	349	208	309	375	327	331
ENSBTAG00000010245	135	27	24	0	3	1	0	0	101	41	59	11	56	0	4	0	0	0	103	8	58	14	94	164	166	51	45	139	2	0	0	0	0	1	10	0	6
ENSBTAG00000011648	223	100	163	418	325	281	68	414	3270	1787	1719	415	1832	8	86	20	23	94	694	61	456	44	439	387	425	233	89	377	213	18	154	163	150	227	209	147	188
ENSBTAG00000052777	0	0	0	0	0	0	0	0	0	0	0	0	0	0	0	0	0	0	0	0	0	0	0	0	0	0	0	0	0	0	0	0	0	0	0	0	0
ENSBTAG00000010948	941	1265	1376	557	731	1095	156	695	606	350	300	63	246	10	84	29	14	81	440	27	152	35	158	1656	1763	2793	482	1509	342	24	197	340	117	385	526	411	322
ENSBTAG00000053554	2	3	8	0	3	1	0	0	0	0	2	1	0	0	2	0	2	2	0	0	0	1	0	4	2	9	1	1	3	0	1	3	2	2	0	2	2
ENSBTAG00000023978	460	386	424	303	313	290	37	151	642	503	379	55	291	12	66	13	16	92	501	88	361	52	505	409	385	431	108	301	286	55	198	234	187	212	293	264	212
ENSBTAG00000019779	0	0	5	0	2	0	0	4	23	17	10	4	5	0	0	0	0	0	10	0	1	0	4	4	18	22	6	8	2	6	11	7	2	34	57	85	80
ENSBTAG00000052586	90	68	41	116	119	92	28	143	124	63	117	24	65	23	116	23	25	104	61	1	40	22	55	77	52	55	14	42	135	11	85	134	92	65	86	64	85
ENSBTAG00000017265	607	567	484	2520	2168	3330	522	2664	1633	748	670	149	614	225	1128	367	268	1221	884	73	539	112	618	593	628	974	126	481	844	138	878	1071	682	773	788	760	705
ENSBTAG00000011144	0	0	0	0	0	0	0	0	1	0	0	0	0	0	0	0	0	0	0	0	0	0	0	0	0	0	0	0	0	0	0	0	0	0	0	0	0
ENSBTAG00000007817	305	243	252	424	376	449	77	415	849	438	399	79	304	26	165	67	36	172	434	57	306	48	414	304	359	320	73	224	366	24	265	336	231	229	309	226	226
ENSBTAG00000007813	42	81	67	406	341	447	79	316	129	87	83	17	82	8	33	30	34	86	74	10	48	11	69	69	61	125	13	63	70	5	39	66	64	103	94	102	104
ENSBTAG00000045697	62	53	73	25	35	43	1	26	158	63	59	27	88	2	44	13	2	22	58	1	28	9	21	106	142	125	34	96	64	7	58	85	55	190	177	129	105
ENSBTAG00000016977	2068	1471	1278	3811	3206	4696	709	3451	2464	1634	1471	263	1175	410	2881	673	739	2792	831	70	472	90	584	1550	1789	1918	429	1303	1371	175	1076	1443	1192	1349	1895	1551	1749
ENSBTAG00000010726	1465	957	956	653	890	983	136	666	809	435	371	76	318	40	258	57	40	208	585	46	362	52	318	1040	1303	916	221	796	168	23	114	190	101	571	610	575	657
ENSBTAG00000042692	0	0	0	0	0	0	0	0	0	0	0	0	0	0	0	0	0	0	0	0	0	0	0	0	0	0	0	0	0	0	0	0	0	0	0	0	0
ENSBTAG00000033167	336	224	288	201	186	190	27	147	558	447	306	61	252	15	106	31	15	134	222	37	192	20	272	297	225	280	63	183	253	15	159	196	133	241	260	177	198
ENSBTAG00000054473	0	0	2	0	3	0	0	0	2	0	0	0	0	0	2	0	0	0	0	0	0	0	0	0	0	4	0	0	0	0	0	0	0	0	0	0	0
ENSBTAG00000013046	7413	5758	4665	969	833	820	165	702	7994	6476	5355	880	3830	165	813	219	221	862	5143	611	3771	895	4554	2556	3766	2975	589	2024	1871	246	1299	1678	1162	3029	4047	3370	3112
ENSBTAG00000013045	1308	1674	1443	775	757	929	112	594	2578	1648	1553	340	1349	116	514	114	171	471	1145	130	651	140	745	1545	1665	2311	370	1153	1611	264	1435	1707	1200	2221	2433	2153	1923
ENSBTAG00000042370	1	8	2	0	0	0	0	0	0	0	0	0	0	0	0	0	0	0	1	0	0	0	0	0	2	2	1	3	4	0	1	1	0	1	5	3	9
ENSBTAG00000049272	0	0	0	0	0	0	0	0	0	0	0	0	0	0	0	0	0	0	0	0	0	0	0	0	0	1	0	0	0	0	0	0	0	0	0	0	0
ENSBTAG00000043347	0	0	0	0	0	0	0	0	0	0	0	0	0	0	0	0	0	0	0	0	0	0	0	1	0	0	0	0	0	0	0	1	0	0	0	1	2
ENSBTAG00000013044	254	247	333	108	200	125	28	92	32	13	18	4	4	11	58	19	11	31	48	6	46	10	14	340	548	263	121	284	37	2	16	25	17	311	416	295	279
ENSBTAG00000023820	0	0	0	0	0	0	0	0	0	0	0	0	0	0	1	0	0	0	0	0	0	0	0	1	0	0	0	0	0	0	0	0	0	0	0	0	0
ENSBTAG00000051663	22	21	30	10	11	7	0	0	24	9	13	2	14	0	2	0	2	0	6	0	4	2	0	10	26	5	5	28	10	0	4	1	8	44	41	22	15
ENSBTAG00000020185	178	170	134	35	48	22	8	24	118	71	46	0	55	4	15	0	4	15	35	1	11	1	20	119	132	57	26	83	50	2	41	48	19	176	231	144	140
ENSBTAG00000047917	2	0	1	0	0	0	0	0	0	0	0	0	0	0	0	0	0	0	0	0	0	0	0	0	0	0	0	0	0	0	0	0	0	0	2	0	0
ENSBTAG00000050830	0	4	2	0	2	2	0	0	23	23	14	0	24	0	0	0	0	0	0	0	0	0	0	1	2	5	0	2	4	0	4	0	0	2	0	0	0
ENSBTAG00000014095	856	811	708	741	678	793	111	489	1287	952	617	122	655	26	148	31	42	125	738	61	382	73	468	1032	1408	1257	244	804	558	61	467	417	287	1131	1288	1197	1069
ENSBTAG00000005250	8181	4124	6549	7434	8330	5935	646	2973	7263	4591	2768	630	2418	48	275	50	35	176	4774	504	3055	643	3608	7636	6739	3348	1059	3766	988	118	677	960	538	4621	6705	5798	5909
ENSBTAG00000000520	25	15	20	22	17	35	0	14	2124	1573	923	136	654	0	2	1	0	5	18	2	8	0	5	14	9	18	1	12	8	0	0	0	7	24	25	9	15
ENSBTAG00000011350	474	570	616	498	567	678	120	550	1244	905	600	157	647	157	822	134	229	790	631	73	470	91	510	498	634	764	158	428	459	65	308	372	308	465	603	553	479
ENSBTAG00000008319	2	0	4	0	0	0	2	0	781	587	226	57	319	0	0	0	0	0	0	0	0	0	0	342	336	292	59	203	0	0	0	2	2	0	0	0	2
ENSBTAG00000017430	6	4	9	643	497	592	84	413	205	210	133	43	143	58	318	91	65	234	0	0	4	0	2	67	37	47	22	46	63	6	48	66	141	92	117	43	51
ENSBTAG00000043002	0	0	0	0	0	0	0	0	0	0	0	0	0	0	0	0	0	0	0	0	0	0	0	0	0	0	0	2	0	0	0	0	0	0	0	0	0
ENSBTAG00000009959	801	732	667	1211	1304	1237	206	1123	5203	4317	3183	641	2848	567	3331	759	642	2579	305	30	164	18	211	948	745	633	236	787	4716	567	3309	4224	2818	171	288	166	183
ENSBTAG00000020547	10007	7329	6944	2241	2569	3386	504	2057	14301	10271	8357	1630	7203	503	3104	602	386	1583	8523	898	6032	1329	8321	5919	6381	10823	1316	4525	5513	573	3886	5481	5210	3536	3783	4278	3758
ENSBTAG00000042885	0	0	0	1	5	3	3	2	0	0	0	0	0	0	0	0	2	4	0	0	0	0	0	2	0	0	0	0	0	0	0	0	0	0	0	0	0
ENSBTAG00000020551	3248	1960	1513	1828	1650	1943	322	1433	4494	3938	2332	543	2242	267	1494	357	537	1771	1574	218	1379	153	1240	2106	2404	1903	512	1702	434	27	205	271	240	1713	2482	1801	1738
ENSBTAG00000010146	148	80	163	209	276	213	27	217	253	169	122	25	106	4	36	5	4	26	28	1	23	0	19	377	411	335	63	239	24	4	24	38	17	120	84	90	117
ENSBTAG00000001058	21	38	67	1440	1228	1682	315	1419	23	35	13	16	16	668	3671	739	1151	4277	12	0	8	0	12	18	32	22	15	35	7	4	6	2	23	112	85	116	94
ENSBTAG00000001059	4163	3979	3164	12846	10721	14325	2874	13943	9918	7010	5115	1155	5222	1138	6631	1576	1653	6138	3789	512	2637	491	3314	2522	2810	3409	544	1984	4153	561	3525	4755	4371	2382	2996	2368	2327
ENSBTAG00000021421	5879	7320	4698	4106	3840	5752	752	3569	5622	3614	3715	870	3370	311	1696	485	405	1692	5388	516	3121	662	3949	3977	4157	6044	1086	3468	18172	2132	12954	21082	17560	9965	12999	13306	16161
ENSBTAG00000043634	0	0	2	0	2	0	0	0	1	0	0	0	1	0	0	0	0	0	0	0	1	0	0	0	0	0	1	0	0	0	0	1	1	11	3	2	2
ENSBTAG00000021422	77	78	52	20	28	20	0	6	55	24	14	0	10	0	7	2	0	8	8	2	0	0	6	158	118	61	19	82	46	2	15	39	14	15	21	4	19
ENSBTAG00000048637	0	0	0	0	0	0	0	0	2	0	2	0	0	0	0	0	0	0	0	0	0	0	0	0	2	0	0	0	0	0	0	0	0	2	0	0	0
ENSBTAG00000038379	194	342	228	192	231	329	30	199	238	164	128	36	158	9	95	19	26	109	172	27	78	16	158	147	155	252	26	127	445	36	323	668	472	264	274	377	345
ENSBTAG00000013462	282	379	436	490	744	429	51	308	5112	4254	3647	427	1949	12	46	6	12	51	89	0	29	7	28	317	176	174	80	195	334	34	153	225	163	607	365	197	186
ENSBTAG00000047138	253	260	268	192	338	238	24	139	868	612	778	90	440	12	56	12	10	34	4	0	1	0	2	0	3	4	0	6	18	2	6	10	4	16	11	14	3
ENSBTAG00000047531	1542	1137	1235	353	397	334	34	187	382	309	185	47	134	6	69	11	17	75	1753	180	978	115	898	3132	5121	6438	964	2877	651	55	330	327	247	8587	12860	8144	7793
ENSBTAG00000047702	1296	1498	1246	1747	1655	2078	341	1506	1925	1140	1040	213	964	150	947	229	271	895	1667	107	975	218	1024	985	1028	1446	217	791	1479	215	1325	1642	1418	1108	1156	1147	1086
ENSBTAG00000047827	692	1080	929	216	264	380	39	219	12808	12479	8818	1675	6816	5	65	1	20	37	1132	82	583	140	654	1319	1716	3241	424	1507	1851	212	1446	1867	1419	2122	2728	2250	2126
ENSBTAG00000011904	4523	3111	3453	1296	1958	1171	153	807	5746	4787	2594	554	2220	282	1667	375	316	1233	2223	297	1897	187	1603	7096	7244	3768	1454	4662	3029	495	2931	2266	1554	5056	7682	3854	3710
ENSBTAG00000045033	0	0	0	0	0	0	0	0	0	0	0	0	0	0	0	0	0	0	0	0	0	0	0	0	0	0	0	0	0	0	0	0	0	0	0	1	0
ENSBTAG00000008278	66	69	62	60	61	87	20	36	207	191	112	26	92	4	10	1	2	1	471	82	427	85	449	86	82	108	21	59	75	11	47	62	58	75	80	97	110
ENSBTAG00000016085	3178	2231	2472	1188	1470	1012	145	790	5250	3950	2192	453	1956	333	2026	194	352	1522	1550	283	1269	137	1326	2660	2209	3020	581	1818	4214	581	3077	2923	2922	3031	3741	2395	2380
ENSBTAG00000047855	1369	1794	1751	819	988	925	164	713	2888	2108	1856	372	1667	150	1123	243	313	1099	811	63	434	109	564	2064	2313	2090	510	1711	1120	108	783	989	670	1606	1744	1420	1389
ENSBTAG00000052492	24	41	22	4	7	11	0	2	23	19	7	1	6	1	3	0	0	4	10	3	2	0	5	43	31	53	19	29	43	0	14	37	32	52	69	48	48
ENSBTAG00000020299	0	0	0	0	0	0	0	0	0	0	0	0	0	0	0	0	0	0	2	0	0	0	0	0	8	4	4	0	0	0	2	0	0	0	12	4	2
ENSBTAG00000020300	0	0	0	0	0	0	2	0	0	0	0	0	0	0	2	0	0	2	0	0	0	0	0	3	1	0	0	2	0	0	0	0	0	8	10	5	0
ENSBTAG00000020127	0	0	3	0	17	2	0	6	390	315	218	48	184	2	18	1	4	6	0	0	0	0	0	0	2	1	0	6	1	0	4	2	0	4	12	7	0
ENSBTAG00000051850	10	11	14	21	46	8	6	15	6	14	4	0	7	0	11	2	4	15	11	5	8	3	4	31	25	19	6	24	9	2	18	11	8	3	24	8	4
ENSBTAG00000011190	45542	33666	32556	10793	14779	10521	1269	5623	17649	11503	6647	1262	5398	633	3812	635	688	2337	4822	547	3297	510	3515	85038	83521	59254	17253	57663	22553	2479	14745	28829	40325	25588	37594	18740	16307
ENSBTAG00000022314	1029	1303	1245	1174	985	1356	170	878	1608	1133	884	207	879	156	747	220	196	682	960	118	600	128	601	1393	1475	1505	311	967	1590	193	948	1462	1081	1110	1481	1262	1013
ENSBTAG00000052040	170	174	163	285	349	689	83	367	515	587	531	125	503	39	150	76	51	225	526	89	426	86	548	202	287	358	63	233	193	12	183	343	239	91	189	226	133
ENSBTAG00000007454	45423	61414	41611	39055	45976	56772	7372	35549	45798	32104	32948	6886	29041	4348	25815	5576	5796	22023	34466	4059	23750	5062	30714	34686	43284	49863	9242	30593	79569	9885	57662	96179	72254	41686	55970	51689	50847
ENSBTAG00000042493	9	19	14	4	4	2	1	3	14	14	9	1	10	8	55	11	9	37	11	0	1	1	4	28	36	34	7	16	21	4	17	10	7	35	26	25	14
ENSBTAG00000007455	1367	1456	1458	879	911	1049	129	729	1614	1093	899	190	627	241	1720	581	459	1685	951	101	508	113	552	2472	3689	3742	697	2623	1034	130	689	978	732	1346	2065	1677	1702
ENSBTAG00000007456	359	389	391	391	464	717	88	397	645	381	310	77	308	61	365	92	113	497	343	48	287	45	273	374	388	824	120	336	302	23	230	297	218	536	589	584	444
ENSBTAG00000051720	15	21	10	6	8	5	0	8	25	18	20	4	29	0	5	0	0	0	27	0	11	6	12	48	66	92	13	61	25	3	26	41	34	98	96	107	96
ENSBTAG00000054681	0	0	0	0	0	0	0	0	0	0	0	0	0	0	0	0	0	0	0	0	0	0	0	0	0	0	0	0	0	0	0	0	0	0	0	0	0
ENSBTAG00000012117	2905	2984	2965	2179	2312	2467	396	1468	9783	6021	4384	898	3642	163	1031	248	245	841	2818	316	1722	307	1575	6896	8051	7641	1536	5243	3518	472	2675	3299	2814	5270	7502	5483	5113
ENSBTAG00000012125	5224	5482	4757	2699	2966	2882	437	2062	9909	7591	5186	1105	4750	196	948	238	198	575	3537	509	2587	387	2298	7744	10012	10085	1965	6240	4312	592	3246	4744	3385	5495	6828	4889	4882
ENSBTAG00000033032	854	1065	1039	841	788	943	119	643	1591	974	786	186	742	101	635	136	107	491	778	62	461	117	543	1220	1629	2524	374	1393	1148	169	983	1175	964	1657	1774	1474	1499
ENSBTAG00000008552	970	1184	1192	187	280	191	25	134	400	343	225	37	188	23	116	25	21	62	127	2	68	4	66	983	869	913	252	825	1339	147	703	802	735	1211	1108	814	695
ENSBTAG00000054868	607	561	503	1393	1245	1506	208	1061	1405	780	604	131	575	113	539	129	143	574	794	68	476	89	626	689	789	1060	129	461	1019	137	708	912	662	611	595	594	586
ENSBTAG00000014331	1327	1430	1216	5323	4569	6337	890	4323	2704	1988	1450	310	1334	228	1751	294	384	1625	936	68	537	134	682	1072	1229	1547	263	791	1862	261	1440	2065	1637	974	1062	1059	941
ENSBTAG00000014333	570	607	666	286	288	213	21	140	1060	802	562	122	421	31	154	19	39	134	361	42	186	34	184	1105	945	879	250	700	847	105	596	624	570	435	663	445	473
ENSBTAG00000012747	636	815	747	437	471	526	58	319	1553	1344	785	161	753	53	269	83	70	311	443	47	286	32	325	2442	2302	3079	616	1966	593	114	601	507	571	655	654	510	464
ENSBTAG00000019512	25734	13119	6635	1107	1481	838	155	516	6506	5560	3296	714	3195	132	733	154	96	440	1764	107	967	172	1010	6143	6701	6234	1387	4591	7261	950	6257	7204	5963	4428	6264	3958	4223
ENSBTAG00000053534	25	11	3	0	8	2	0	2	18	9	5	0	5	0	0	0	0	0	2	0	4	1	2	9	20	9	0	10	9	0	5	4	2	16	29	18	4
ENSBTAG00000006268	875	944	896	652	639	648	104	487	968	760	491	94	416	46	345	76	122	372	824	107	589	99	721	1245	1561	1552	325	1019	904	164	811	1033	670	1032	1369	908	1023
ENSBTAG00000001900	18	7	17	3	6	6	0	4	5	9	14	0	0	5	9	2	4	9	4	0	14	0	6	12	48	17	3	13	8	0	10	4	3	29	28	8	17
ENSBTAG00000048914	0	0	0	0	0	0	0	0	0	0	0	0	0	0	0	0	0	2	1	0	0	0	0	0	0	0	0	0	0	0	0	0	0	0	0	2	0
ENSBTAG00000055292	0	0	0	0	0	0	0	0	0	0	0	0	0	0	0	0	0	0	0	0	0	0	0	0	0	0	0	0	0	0	0	0	0	0	0	0	0
ENSBTAG00000053848	0	0	0	0	0	0	0	0	0	0	0	0	0	0	0	0	0	0	1	0	0	0	0	0	0	0	0	0	0	0	0	0	0	1	0	0	0
ENSBTAG00000043130	0	0	0	0	0	0	0	0	0	0	0	0	0	0	0	0	0	0	0	0	3	0	0	0	0	0	0	0	0	0	0	0	0	5	1	4	0
ENSBTAG00000048534	0	0	0	0	0	0	0	0	0	0	0	0	0	0	0	0	0	0	0	0	0	0	0	0	0	0	0	0	0	0	0	0	0	0	0	1	0
ENSBTAG00000052652	0	0	0	0	0	0	0	0	0	0	0	0	0	0	0	0	0	0	0	0	0	0	0	0	0	0	0	0	0	0	0	0	0	0	0	0	0
ENSBTAG00000049584	0	0	0	0	0	0	0	0	0	0	0	0	0	0	0	0	0	0	0	0	0	0	0	0	0	1	0	1	0	0	0	0	0	0	0	0	0
ENSBTAG00000054052	0	0	0	0	0	0	0	0	0	0	0	0	0	0	0	0	0	0	0	0	0	0	0	0	0	0	0	0	0	0	0	0	0	0	0	0	0
ENSBTAG00000048281	0	0	0	0	0	0	0	0	0	0	0	0	0	0	0	0	0	0	0	0	0	0	0	0	0	0	0	0	0	0	0	0	0	0	0	0	0
ENSBTAG00000049678	0	0	0	0	0	0	0	0	0	0	0	0	0	0	0	0	0	0	0	0	0	0	0	0	0	0	0	0	0	0	0	0	0	0	0	0	0
ENSBTAG00000036343	73	59	13	0	0	0	0	0	0	0	0	0	0	0	0	0	0	0	0	0	0	0	0	0	0	0	0	0	0	0	0	0	0	0	0	0	0
ENSBTAG00000049844	0	0	0	0	0	0	0	0	0	0	0	0	0	0	0	0	0	0	0	0	0	0	0	0	0	0	0	0	0	0	0	0	0	0	0	0	0
ENSBTAG00000033445	0	0	0	0	0	0	0	0	0	0	0	0	0	0	0	0	0	0	0	0	0	0	0	0	0	0	0	0	0	0	0	0	0	0	0	0	0
ENSBTAG00000049694	0	0	0	0	0	0	0	0	0	0	0	0	0	0	0	0	0	0	0	0	0	0	0	0	0	0	0	0	0	0	0	0	0	0	0	0	0
ENSBTAG00000051023	55	34	46	16	20	19	0	21	90	50	60	12	21	0	26	11	7	29	30	6	16	3	25	58	91	82	12	48	43	17	66	54	37	58	66	41	75
ENSBTAG00000019942	56	49	65	26	27	17	0	10	6	23	7	0	9	2	6	0	8	14	5	0	3	0	2	24	26	8	6	4	24	0	16	2	8	25	38	45	20
ENSBTAG00000033749	14	15	20	42	25	30	6	30	79	24	11	6	17	0	6	2	0	0	6	2	0	0	8	47	36	33	13	67	8	4	8	12	3	6	3	4	21
ENSBTAG00000051994	0	0	0	0	0	0	0	0	0	0	0	0	0	0	0	0	0	0	0	0	0	0	0	2	0	0	0	0	0	0	0	0	0	0	0	0	0
ENSBTAG00000001911	6	6	10	0	4	0	0	4	190	68	72	0	29	2	2	0	0	0	1	0	4	0	6	6	2	2	2	0	0	0	0	2	0	4	10	4	0
ENSBTAG00000046895	0	0	0	0	0	0	0	0	0	0	0	0	0	0	0	0	0	0	0	0	0	0	0	0	0	0	0	0	0	0	0	0	0	0	0	0	0
ENSBTAG00000011277	13	6	10	15	4	8	0	8	18	4	2	0	0	0	0	0	0	1	2	0	0	0	2	10	6	15	0	10	14	0	4	14	3	12	7	3	5
ENSBTAG00000046059	0	0	0	0	0	0	0	0	0	0	0	0	0	0	0	0	0	0	0	0	0	0	0	0	0	0	0	0	0	0	0	0	0	0	0	0	0
ENSBTAG00000043883	0	0	0	0	0	0	0	0	0	0	0	0	0	0	0	0	0	0	0	0	0	0	0	0	0	0	0	0	0	0	0	0	0	0	0	0	0
ENSBTAG00000053314	0	0	0	0	0	0	0	0	0	0	0	0	0	0	0	0	0	0	0	0	0	0	0	0	0	0	0	0	0	0	0	0	0	0	0	0	0
ENSBTAG00000038813	0	0	0	0	0	0	0	0	0	0	0	0	0	0	0	0	0	0	0	0	0	0	0	0	0	0	0	0	0	0	0	0	0	0	0	0	0
ENSBTAG00000053993	0	0	0	0	0	0	0	0	0	0	0	0	0	0	0	0	0	0	0	0	0	0	0	0	0	0	0	0	0	0	0	0	0	0	0	0	0
ENSBTAG00000048495	0	0	0	0	0	0	0	0	0	0	0	0	0	0	0	0	0	0	0	0	0	0	0	0	0	0	0	0	0	0	0	0	0	0	0	0	0
ENSBTAG00000038815	172	47	74	16	41	22	0	13	85	80	57	10	48	0	10	4	2	5	51	1	30	6	56	195	150	64	35	121	83	5	55	71	24	120	126	72	83
ENSBTAG00000042743	0	0	0	0	0	0	0	0	0	0	0	0	0	0	0	0	0	0	0	0	0	0	0	0	0	0	0	0	0	0	0	1	0	1	0	2	0
ENSBTAG00000050709	468	194	203	47	70	37	8	21	313	143	123	23	113	9	18	11	3	36	125	13	80	11	52	381	371	142	66	263	161	18	115	180	121	296	329	185	185
ENSBTAG00000005395	20	41	27	18	20	34	3	18	24	21	22	3	12	4	8	2	2	19	8	0	2	3	7	14	5	35	6	13	31	5	25	51	42	20	19	30	25
ENSBTAG00000048028	0	0	0	0	0	0	0	0	0	0	0	0	0	0	0	0	0	0	0	0	0	0	0	0	0	4	0	0	0	0	0	0	0	0	0	0	0
ENSBTAG00000016019	0	0	0	0	0	0	0	0	0	0	0	0	0	0	0	0	0	0	0	0	0	0	0	0	0	0	0	0	0	0	0	0	0	0	0	0	0
ENSBTAG00000032923	7	3	2	0	0	0	0	0	0	0	0	0	0	0	0	0	0	0	4	2	11	0	5	0	0	0	0	0	0	0	2	4	0	0	0	0	0
ENSBTAG00000014169	110	79	103	60	82	56	12	33	4	2	0	0	1	2	14	2	6	8	205	106	456	43	448	114	81	36	23	126	196	12	112	109	57	4	4	0	0
ENSBTAG00000021059	20	24	52	0	0	0	0	0	0	0	0	0	0	0	5	6	0	6	0	0	0	0	0	9	14	7	2	9	0	0	0	0	0	0	0	0	0
ENSBTAG00000045550	1055	1372	1052	668	790	922	151	597	3113	1653	1706	334	1473	54	272	68	49	206	1229	134	805	187	786	1947	1818	2271	355	1179	1120	91	804	1243	743	302	298	366	325
ENSBTAG00000037686	737	1827	1046	233	228	260	17	134	359	228	161	17	96	10	75	14	6	47	24	4	10	2	6	492	391	238	66	176	89	8	36	83	62	4	22	20	8
ENSBTAG00000040255	0	0	0	0	0	0	0	0	0	0	0	0	0	0	0	0	0	0	0	0	0	0	0	0	0	0	0	0	0	0	0	0	0	0	0	0	0
ENSBTAG00000032875	0	2	6	0	0	2	0	0	4	0	0	2	0	1	6	0	0	0	0	0	0	0	0	8	9	17	7	6	2	0	1	2	0	0	0	2	0
ENSBTAG00000022502	0	0	0	0	0	0	0	0	0	0	0	0	0	0	0	0	0	0	0	0	0	0	0	0	0	0	0	0	0	0	0	0	0	0	0	0	0
ENSBTAG00000048265	0	0	0	0	0	0	0	1	3	0	0	0	0	0	0	0	0	0	0	0	0	0	0	0	1	2	0	0	1	0	0	0	0	0	0	0	1
ENSBTAG00000046608	176	157	197	45	59	55	7	48	160	72	76	12	67	4	53	15	9	40	43	6	22	4	37	79	150	94	19	149	55	0	37	56	53	74	141	80	127
ENSBTAG00000050607	30	34	37	17	11	15	1	15	23	18	12	2	21	4	9	3	2	15	1	0	7	2	2	16	42	28	9	38	7	1	3	13	14	6	14	28	10
ENSBTAG00000032852	118	193	183	67	91	77	6	80	313	169	177	22	171	10	45	4	11	32	111	16	66	17	63	100	370	290	63	227	81	4	52	84	40	143	148	144	120
ENSBTAG00000047213	176	227	344	82	104	103	12	82	275	138	128	29	148	3	27	23	2	34	118	11	55	30	102	162	384	334	104	325	94	8	35	62	18	223	244	179	169
ENSBTAG00000010114	318	339	356	176	215	211	59	173	739	330	317	70	264	6	58	19	18	59	252	24	170	40	152	352	535	590	88	366	169	31	179	186	162	613	464	484	476
ENSBTAG00000020522	0	0	0	0	0	0	0	0	4	0	0	0	0	0	0	0	0	0	0	0	0	0	0	34	124	53	12	67	0	0	1	0	0	0	0	0	0
ENSBTAG00000027978	0	0	0	0	0	0	0	0	0	0	0	0	0	0	0	0	0	0	0	0	0	0	0	0	0	0	0	0	0	0	0	0	0	0	0	0	0
ENSBTAG00000045481	0	0	0	0	0	0	0	0	0	0	0	0	0	0	0	0	0	0	0	0	0	0	0	0	0	0	0	0	0	0	0	0	0	0	0	0	0
ENSBTAG00000037637	0	0	0	0	0	0	0	0	0	0	0	0	0	0	0	0	0	0	0	0	0	0	0	0	0	0	0	0	0	0	0	0	0	0	0	0	0
ENSBTAG00000014670	6	18	14	19	35	26	13	74	526	208	286	49	274	0	7	0	0	0	0	0	0	0	2	96	124	111	20	87	3	0	0	9	2	104	61	64	88
ENSBTAG00000003601	16	60	38	12	14	27	0	27	740	474	342	80	471	2	10	0	3	10	73	1	58	10	46	49	69	125	24	78	0	0	0	4	0	83	38	70	37
ENSBTAG00000005319	0	0	0	0	0	0	0	0	0	0	0	0	0	0	0	0	0	0	0	0	0	0	0	0	0	0	0	0	0	0	0	0	0	0	0	0	0
ENSBTAG00000019417	356	307	394	268	336	273	36	124	2127	1382	963	170	857	6	51	10	22	29	182	22	125	20	89	402	728	864	149	582	136	14	91	136	66	601	730	705	542
ENSBTAG00000050056	118	136	170	104	112	76	17	37	374	192	122	40	144	5	29	3	9	36	71	9	48	6	58	203	280	361	57	201	96	8	54	67	42	168	207	210	125
ENSBTAG00000037996	1967	1649	1669	1065	1165	927	140	709	5340	2638	2258	435	1815	81	669	191	135	561	937	80	413	62	358	2713	3386	2645	519	1727	781	74	422	738	391	2508	2783	2250	2182
ENSBTAG00000026139	717	723	733	242	370	220	45	200	739	481	397	96	449	25	58	16	19	64	140	9	45	14	92	867	831	850	130	521	171	19	127	187	75	150	208	199	157
ENSBTAG00000038204	2	0	1	0	0	4	0	1	0	1	2	0	0	0	0	0	0	0	0	0	0	0	0	0	0	1	4	0	0	0	0	3	0	0	0	0	0
ENSBTAG00000052983	432	340	357	71	135	82	19	72	523	281	178	79	237	0	38	12	4	22	44	4	43	6	34	765	676	485	131	425	110	12	60	96	45	107	121	56	75
ENSBTAG00000050068	18	8	14	2	12	9	2	7	51	22	11	0	11	0	0	0	0	0	6	0	2	0	0	67	33	10	6	24	5	0	2	8	4	5	4	0	4
ENSBTAG00000007499	1367	1567	1398	1090	896	1259	186	794	3480	2014	1966	413	1619	114	700	247	170	636	1804	204	1046	256	1245	1680	1835	2020	358	1249	1702	203	1366	2002	1448	1987	2338	2243	2221
ENSBTAG00000019256	1071	821	832	264	274	157	30	109	1272	785	568	114	500	18	93	30	27	106	538	69	309	44	344	1154	1315	629	263	939	394	44	256	330	184	779	1115	709	820
ENSBTAG00000019253	4640	6291	3569	6019	6082	9277	1198	6002	5330	3084	3692	763	3232	596	3582	1089	1097	4287	2667	284	1688	393	2106	2478	3394	5019	746	2676	11713	1308	7908	14850	8658	6840	6724	7175	5623
ENSBTAG00000019250	349	362	408	58	74	71	8	16	78	79	62	12	21	4	18	4	4	16	314	27	151	32	130	665	1234	1445	197	598	150	4	51	88	44	1700	2467	2131	1863
ENSBTAG00000050517	0	4	0	0	0	0	0	0	0	0	0	0	0	0	0	0	0	0	0	0	0	0	0	3	2	1	0	3	1	0	1	0	0	15	8	6	8
ENSBTAG00000022292	323	372	228	1363	925	1340	172	954	2157	1125	1046	226	1054	35	317	110	82	448	1225	141	688	194	969	200	233	327	47	171	951	150	705	1212	740	375	377	408	312
ENSBTAG00000001979	0	4	0	0	0	0	0	0	5	0	0	0	6	0	18	16	10	43	10	4	12	4	12	1	1	0	0	0	0	0	2	0	0	7	9	13	7
ENSBTAG00000001975	33	57	17	0	0	4	0	0	25	12	12	4	23	2	10	2	6	16	0	0	0	0	2	2	0	0	4	0	12	2	2	5	2	0	14	2	6
ENSBTAG00000021254	386	237	232	90	117	109	16	78	270	246	153	39	133	16	79	19	18	55	137	32	108	26	63	453	574	470	98	347	228	71	245	302	216	638	749	641	658
ENSBTAG00000021252	108	174	122	17	50	39	8	28	44	48	26	9	41	10	32	7	8	13	16	0	4	0	10	312	294	246	40	156	70	2	46	73	50	15	71	40	62
ENSBTAG00000053172	8	15	14	2	6	8	6	2	11	12	9	0	14	0	4	0	1	0	7	2	7	0	5	13	4	6	5	11	12	0	7	12	9	14	13	14	7
ENSBTAG00000020390	12	16	14	0	5	2	4	0	8	6	5	5	8	0	1	1	0	0	5	0	1	0	1	6	4	12	0	7	5	0	3	14	2	11	6	10	7
ENSBTAG00000005378	6	10	0	0	2	9	0	2	43	30	29	4	11	0	7	0	0	2	8	0	6	0	4	35	24	56	6	21	78	10	67	70	55	56	65	80	72
ENSBTAG00000016761	2	2	4	0	0	2	0	0	2	3	0	0	1	0	0	0	0	0	0	0	1	0	0	3	4	17	0	0	4	1	8	11	4	10	25	14	4
ENSBTAG00000003547	307	233	211	249	216	204	34	157	841	378	340	81	347	22	102	36	18	79	252	29	152	42	130	702	783	704	124	533	534	105	545	599	519	706	714	660	562
ENSBTAG00000005724	348	257	357	137	96	83	18	69	670	353	267	102	304	10	96	16	15	81	179	12	159	6	158	478	456	358	90	405	355	24	209	280	259	286	289	204	251
ENSBTAG00000006026	939	865	627	274	383	302	34	125	4593	2436	2407	463	1938	24	112	21	13	56	232	45	240	30	104	483	660	624	87	276	432	39	233	364	149	395	579	549	379
ENSBTAG00000048143	127	181	194	42	27	20	0	6	63	39	45	3	18	4	12	0	7	8	31	3	15	6	18	16	13	22	4	20	106	2	28	33	20	46	45	52	24
ENSBTAG00000046707	0	0	0	0	0	0	0	0	0	0	0	0	0	0	0	0	0	0	0	0	0	0	0	0	0	0	0	0	0	0	0	0	0	0	0	0	0
ENSBTAG00000036028	380	344	350	320	364	424	51	269	3742	2214	2595	456	2213	7	100	20	27	84	4062	434	2587	638	3713	963	836	1396	243	653	153	21	70	191	213	380	239	459	380
ENSBTAG00000046972	0	0	0	0	0	0	0	0	0	0	0	0	0	0	0	0	0	0	0	0	0	0	0	0	0	0	0	0	0	0	0	0	0	0	0	0	0
ENSBTAG00000049653	0	0	0	0	0	0	0	0	0	0	1	0	0	0	0	0	0	0	0	0	0	0	0	0	0	0	0	0	0	0	0	0	0	0	0	0	0
ENSBTAG00000027843	949	875	805	793	886	1118	112	608	1631	913	839	142	578	33	190	56	30	131	2904	417	2357	415	2902	671	592	599	126	385	962	130	498	987	601	699	678	641	618
ENSBTAG00000051378	6	8	6	0	0	5	0	0	59	1043	558	8	42	0	11	2	0	0	2	15	59	7	0	8	23	16	0	2	9	0	0	4	0	17	47	47	8
ENSBTAG00000050869	31	39	40	26	38	55	9	31	55	48	27	5	19	0	9	0	1	7	147	4	93	35	121	30	31	28	8	21	35	2	24	37	38	18	38	20	28
ENSBTAG00000014223	3	2	4	4	0	2	0	2	4	7	5	1	2	0	1	0	0	2	1	1	0	0	2	0	0	2	0	4	1	0	2	4	1	3	2	4	1
ENSBTAG00000032450	1	7	2	9	5	13	1	3	11	4	3	0	1	0	6	0	1	6	0	0	0	0	5	3	4	4	0	3	11	0	2	12	9	1	1	3	2
ENSBTAG00000022204	1050	1559	1542	2294	1899	3246	425	2232	2631	1840	1541	355	1343	90	460	116	123	405	2182	226	1277	281	1748	1250	1435	1411	283	1039	1221	68	659	1128	860	838	932	796	872
ENSBTAG00000049730	271	409	364	323	338	427	75	265	481	338	266	41	270	25	140	29	11	93	361	41	407	55	334	333	315	386	75	239	204	14	149	192	159	250	270	337	283
ENSBTAG00000001311	4177	4318	4104	3335	2872	4237	606	3021	7875	4130	4044	815	3784	570	3664	910	876	2920	5888	561	3646	803	4564	4055	3611	4273	719	2563	5274	697	4411	5995	4282	3394	2938	3266	2897
ENSBTAG00000003320	0	0	0	0	0	2	0	0	0	0	0	0	0	0	0	0	0	0	0	0	0	0	0	0	0	0	0	0	0	0	0	0	0	0	0	0	0
ENSBTAG00000006977	42	180	283	12	44	39	7	23	36	2	41	0	27	4	16	16	4	48	16	0	10	2	14	7	2	24	0	17	89	2	1	26	20	8	26	26	32
ENSBTAG00000019820	10	5	15	0	3	0	0	2	6	0	0	2	3	0	0	0	0	2	0	0	0	0	4	0	2	4	0	2	2	0	2	1	0	8	4	1	8
ENSBTAG00000047211	0	0	0	0	0	0	0	0	0	0	0	0	0	0	0	0	0	0	0	0	0	0	0	0	0	0	0	0	0	0	0	0	0	0	0	0	0
ENSBTAG00000052155	5858	2747	1955	112	116	144	22	109	986	585	1380	93	414	20	108	37	22	66	58	10	34	8	107	138	86	150	48	125	227	36	107	183	121	251	165	311	390
ENSBTAG00000053141	0	0	0	0	0	0	0	0	0	0	0	0	0	0	0	0	0	0	0	0	0	0	0	0	0	0	0	0	0	0	0	0	0	0	0	0	0
ENSBTAG00000014287	0	0	0	0	0	0	0	0	0	0	0	0	0	0	0	0	0	0	0	0	0	0	0	0	0	0	0	0	0	0	0	0	0	0	0	0	0
ENSBTAG00000046436	0	0	0	0	0	0	0	0	0	0	0	0	0	0	0	0	0	0	0	0	0	0	0	0	0	0	0	0	0	0	0	0	0	0	0	0	0
ENSBTAG00000054469	29	21	38	19	28	22	7	25	138	35	49	4	30	5	14	16	4	37	21	0	6	8	21	83	91	79	17	51	33	0	19	14	14	196	216	168	191
ENSBTAG00000052647	63	95	130	28	40	27	3	18	74	20	41	6	16	0	7	9	0	4	29	4	13	2	11	41	102	79	19	86	67	5	41	27	29	104	208	177	163
ENSBTAG00000004008	230	92	94	45	42	29	2	26	277	120	135	28	97	9	43	29	10	58	102	16	105	11	56	206	273	98	52	205	206	13	176	163	95	168	223	170	119
ENSBTAG00000005953	0	0	0	0	0	0	0	0	0	0	0	0	0	0	0	0	0	0	0	0	0	0	0	1	4	0	0	0	0	0	0	0	0	0	0	0	0
ENSBTAG00000053380	2	1	0	0	2	0	0	0	0	0	0	0	0	0	0	0	0	0	0	0	5	0	0	0	0	0	0	0	0	0	1	1	0	0	0	0	1
ENSBTAG00000009457	0	0	0	0	0	0	0	0	12	0	7	2	0	0	0	0	0	0	0	0	0	0	0	0	0	0	0	0	0	0	0	0	0	0	0	0	0
ENSBTAG00000045756	7	2	4	7	5	8	0	7	12	0	5	1	0	0	1	0	0	2	0	0	2	0	0	4	6	0	0	7	6	0	0	17	11	7	9	2	2
ENSBTAG00000044025	0	0	4	0	1	2	0	0	58	29	52	8	34	0	0	0	0	0	0	0	0	0	0	0	0	0	0	0	0	0	0	2	0	17	11	26	20
ENSBTAG00000004836	2111	600	1267	604	600	264	44	243	6307	3944	2761	451	1992	10	127	13	14	47	5	0	6	3	0	35	43	5	9	21	23	4	4	4	10	8	11	2	19
ENSBTAG00000047655	0	0	0	0	6	0	0	0	0	5	0	0	0	0	0	0	0	0	4158	386	2168	568	3545	3	0	0	0	0	1	0	0	0	0	0	0	0	1
ENSBTAG00000053716	0	0	0	0	0	0	0	0	0	0	0	0	0	0	0	0	0	0	1	0	0	0	1	0	0	0	0	0	0	0	0	0	0	0	0	0	0
ENSBTAG00000048881	18	1	8	4	0	2	0	3	22	21	22	8	25	0	4	2	0	2	8	2	0	0	3	28	9	0	6	15	4	0	2	8	0	3	6	1	4
ENSBTAG00000050958	28	9	6	7	4	4	1	5	48	15	34	5	21	0	2	8	4	2	3	0	0	0	7	12	13	4	7	7	7	0	0	2	0	10	10	1	9
ENSBTAG00000040132	71	48	39	13	36	17	2	9	182	63	81	22	87	0	15	25	10	30	19	4	4	0	4	57	22	20	5	18	19	0	8	6	4	33	57	19	39
ENSBTAG00000003668	2	15	29	8	0	4	2	10	18	0	12	2	8	0	1	2	4	8	175	15	98	19	62	8	0	48	13	45	144	0	21	135	198	110	9	124	397
ENSBTAG00000055181	0	0	0	0	0	0	0	0	0	0	0	0	0	0	0	0	0	0	0	0	0	0	0	0	0	0	0	0	0	0	0	0	0	0	0	0	0
ENSBTAG00000022920	149	58	76	221	153	331	40	253	8064	4682	4006	766	3334	118	618	242	202	839	11382	1524	9635	1857	9544	1448	1142	1688	316	1082	704	106	744	819	583	754	734	876	837
ENSBTAG00000046314	239	253	202	43	46	49	3	28	405	185	225	21	181	9	71	8	2	23	351	34	212	45	213	240	297	137	46	147	155	14	115	144	101	177	234	131	221
ENSBTAG00000044115	0	0	0	0	0	0	0	0	169	169	259	18	100	0	0	0	0	0	25	2	18	4	35	0	0	0	0	0	0	0	0	0	0	0	0	0	0
ENSBTAG00000005294	479	497	414	166	150	132	19	73	3685	2760	2677	486	2113	11	65	12	13	34	720	104	566	122	544	212	194	168	52	165	196	20	108	171	84	73	128	62	62
ENSBTAG00000055282	2	7	0	0	1	0	0	2	24993	19801	15726	2860	12337	0	46	0	0	2	793	129	557	90	709	0	0	0	2	0	0	0	2	6	4	2	4	2	2
ENSBTAG00000045876	218	150	136	42	60	47	8	44	328	211	233	40	170	4	29	1	2	18	153	23	192	2	146	117	111	29	23	67	86	12	45	63	46	13	48	31	39
ENSBTAG00000000955	102	88	109	76	68	76	12	48	219	96	110	20	90	15	49	13	20	72	59	6	18	7	61	182	148	154	39	131	158	31	140	122	98	179	110	123	126
ENSBTAG00000052886	8	20	6	0	4	4	0	2	228	113	132	31	105	0	0	0	0	2	18	1	2	7	11	18	12	6	1	9	7	0	4	2	4	6	10	2	12
ENSBTAG00000003321	2	8	2	35	38	95	28	104	221	148	86	24	125	0	5	0	0	7	13	1	11	5	6	68	60	84	25	74	8	2	14	28	15	8	6	8	10
ENSBTAG00000044506	0	0	0	0	0	0	0	0	0	0	0	0	0	0	0	0	0	0	0	0	0	0	0	0	0	0	0	0	0	0	0	0	0	0	0	0	0
ENSBTAG00000044745	0	0	0	0	0	0	0	0	0	0	0	0	0	0	0	0	0	0	0	0	0	0	0	0	0	0	0	0	0	0	0	0	0	0	0	0	0
ENSBTAG00000003121	7	0	8	12	9	8	2	12	17	6	8	6	4	0	4	0	0	2	6	0	1	0	2	0	1	0	2	1	1	0	4	0	0	16	144	30	35
ENSBTAG00000019703	1096	1143	965	932	940	1051	175	841	2092	1217	1133	232	1103	140	840	204	219	774	1011	106	714	113	735	1011	1071	1132	208	667	578	87	442	613	403	1649	1985	2123	1750
ENSBTAG00000045877	3999	4268	4932	1961	2609	1660	295	1405	4118	3065	1697	358	1426	895	5442	837	1203	4405	3117	383	2273	337	1971	9757	14126	7674	1764	5731	1578	210	1134	1003	700	8538	7606	4133	4455
ENSBTAG00000050604	0	2	0	0	0	0	0	0	0	0	0	0	0	0	0	0	0	2	0	0	0	0	0	0	0	0	0	0	0	0	0	0	0	0	2	0	0
ENSBTAG00000021968	303	127	285	66	107	70	7	63	217	97	115	19	94	10	40	10	6	22	44	6	34	0	25	429	456	218	83	401	217	30	155	193	122	150	203	188	132
ENSBTAG00000045338	0	0	0	0	0	0	0	0	0	0	0	0	0	0	0	0	0	0	0	0	0	0	0	0	0	0	0	1	0	0	0	2	0	3	0	0	0
ENSBTAG00000048086	0	0	4	0	2	0	0	0	26	4	0	1	8	0	0	0	0	0	0	0	0	0	0	2	0	2	0	2	6	2	9	10	2	0	0	0	2
ENSBTAG00000007859	0	0	4	0	0	0	0	0	490	273	201	14	122	0	0	0	0	0	0	0	0	0	0	2	0	0	0	0	1	0	2	0	0	0	0	0	0
ENSBTAG00000013721	293	168	216	100	91	87	25	78	357	207	202	40	148	23	85	26	6	66	140	15	83	21	82	207	191	92	43	157	261	53	275	330	254	132	137	118	118
ENSBTAG00000013724	286	194	192	181	166	202	30	185	369	193	162	39	186	37	256	103	78	261	168	23	146	20	136	173	163	143	35	117	209	42	170	297	204	122	208	170	188
ENSBTAG00000054471	0	0	0	0	0	0	0	0	0	0	0	0	0	0	0	0	0	0	0	0	0	0	0	0	0	0	0	0	0	0	0	0	0	3	0	0	0
ENSBTAG00000013760	164	152	149	307	400	236	26	153	444	468	289	36	189	9	49	9	2	36	134	33	136	5	120	398	426	146	69	222	470	31	217	224	128	21	57	18	20
ENSBTAG00000043692	0	0	0	0	0	0	0	0	0	0	0	0	0	0	0	0	0	0	0	0	0	0	0	0	0	0	0	0	0	0	0	0	0	0	0	0	0
ENSBTAG00000014575	282	297	285	260	330	228	31	165	2310	1502	1026	199	790	10	48	32	15	44	384	70	396	33	252	3258	3880	1430	415	1525	875	93	583	510	414	151	272	88	84
ENSBTAG00000042426	0	0	0	0	0	0	0	0	0	0	0	0	0	0	0	0	0	0	0	0	0	0	0	0	0	0	0	0	0	0	0	0	0	0	0	0	0
ENSBTAG00000036929	0	0	0	0	0	0	0	0	0	0	0	0	0	0	0	0	0	0	0	0	0	0	0	0	0	0	0	0	0	0	0	1	0	0	0	0	0
ENSBTAG00000006535	0	2	0	0	0	0	0	0	91	97	18	9	40	0	0	0	0	0	0	0	0	0	0	0	0	0	0	2	0	0	0	0	0	0	2	0	0
ENSBTAG00000046820	0	0	0	0	0	0	0	0	0	0	0	0	0	0	0	0	0	0	1	0	0	0	0	2	0	0	0	0	0	0	5	0	1	0	0	1	0
ENSBTAG00000032696	0	0	0	0	0	0	0	0	0	0	0	0	0	0	0	0	0	0	0	0	0	0	0	0	0	0	0	0	0	0	0	0	0	0	0	0	0
ENSBTAG00000026003	0	0	1	2	0	0	0	0	1	0	0	0	0	0	0	0	0	0	0	0	0	0	0	0	0	4	0	0	0	0	0	0	0	0	0	2	0
ENSBTAG00000020739	336	299	262	112	150	119	22	89	433	238	286	45	219	2	34	12	14	35	242	31	142	45	150	423	552	542	87	331	625	103	496	890	501	886	838	789	859
ENSBTAG00000012319	10	10	6	17	34	5	4	2	7	2	4	0	4	10	47	10	10	37	2	0	6	0	4	35	34	12	4	16	3	0	2	3	1	71	78	44	38
ENSBTAG00000018986	2109	1386	1511	596	608	383	53	371	5509	2726	2393	487	1912	68	285	87	67	260	615	44	320	43	227	2995	3511	2686	626	2329	360	43	230	360	186	1547	2544	1587	1568
ENSBTAG00000037413	1094	939	781	1845	2222	1995	330	1462	2905	1842	1861	343	1412	203	1025	215	232	860	296	10	153	34	120	1379	1414	1332	340	955	2495	338	1742	2370	2134	1573	1572	1529	1415
ENSBTAG00000046985	0	0	0	0	0	0	0	0	0	0	0	0	0	0	0	0	0	0	0	0	0	0	0	0	0	0	0	0	0	0	0	0	0	0	0	0	0
ENSBTAG00000022288	101	76	60	37	35	37	10	22	131	102	52	2	53	0	10	2	2	22	46	10	41	2	16	206	268	136	62	136	170	55	276	198	144	133	157	87	81
ENSBTAG00000037650	14	12	11	0	0	0	0	0	20	6	4	2	16	0	0	0	0	0	1	0	0	0	0	4	3	0	0	6	0	0	4	2	0	2	2	0	2
ENSBTAG00000017978	0	0	0	0	0	0	0	0	0	10	12	0	7	0	0	0	0	0	0	0	0	0	0	0	0	0	0	0	0	0	0	0	0	0	0	0	0
ENSBTAG00000055175	0	0	0	0	0	0	0	0	6	28	19	6	10	0	0	0	0	0	0	0	0	0	0	0	0	0	0	0	0	0	0	0	0	0	0	0	0
ENSBTAG00000004432	15423	18882	20323	339	584	653	84	442	491	421	333	51	236	52	548	197	169	517	146	7	32	14	47	821	1291	1276	402	1374	3253	229	1211	1787	1217	255	394	170	136
ENSBTAG00000015670	118	66	79	16	23	13	0	11	57	41	26	8	43	2	13	2	5	7	10	0	8	0	7	62	41	14	6	37	13	0	8	17	0	14	58	14	37
ENSBTAG00000000828	625	198	1040	77	81	109	6	36	5520	3842	2401	423	1823	113	695	86	95	423	172	21	147	33	131	295	195	99	62	235	2	0	0	5	0	9	33	4	6
ENSBTAG00000019591	20	4	0	4	6	2	0	4	25	6	4	4	10	0	4	0	0	0	0	2	2	0	1	3	8	4	2	4	11	2	8	9	5	9	6	6	11
ENSBTAG00000045811	0	0	0	0	0	0	0	0	0	0	0	0	0	0	0	0	0	0	0	0	0	0	0	0	0	0	0	0	0	0	0	0	0	0	0	0	0
ENSBTAG00000053463	0	0	0	0	4	0	0	0	0	0	1	0	2	4	4	0	0	8	0	0	0	0	0	0	0	2	0	0	1	0	0	0	0	2	0	0	0
ENSBTAG00000004586	289	357	321	1076	907	1026	164	791	791	372	366	81	338	50	278	90	92	285	414	30	211	63	355	327	239	434	91	192	280	49	242	333	315	551	391	395	368
ENSBTAG00000015251	56	31	37	28	30	48	10	37	110	55	47	16	97	4	24	17	10	30	28	6	16	2	23	68	13	59	18	37	19	0	8	10	8	191	88	67	94
ENSBTAG00000010065	0	1	0	2	0	0	0	0	40	14	8	0	9	0	0	0	0	1	2	0	4	0	4	40	12	8	14	54	0	0	0	0	0	0	10	6	0
ENSBTAG00000049974	0	0	0	0	0	0	0	0	0	0	0	0	0	0	0	0	0	0	0	0	0	0	0	0	0	0	0	0	0	0	0	0	0	0	0	0	0
ENSBTAG00000051180	0	0	0	0	0	0	0	0	0	0	0	0	0	0	0	0	0	0	0	0	0	0	0	0	0	0	0	0	0	0	0	0	0	0	0	0	0
ENSBTAG00000032485	4	48	26	0	10	0	0	0	3	4	6	0	4	0	9	2	0	12	0	0	0	0	0	210	731	798	134	370	4	0	4	2	0	0	0	0	0
ENSBTAG00000016221	1067	1178	1444	345	438	339	46	200	1727	1138	993	168	805	234	1176	484	250	1120	676	79	406	85	458	3062	4718	2374	745	2508	357	23	161	261	161	355	560	249	347
ENSBTAG00000045340	0	0	0	0	0	0	0	0	0	0	0	0	0	0	0	0	0	0	0	0	0	0	0	0	0	0	0	0	0	0	0	0	0	0	0	0	0
ENSBTAG00000016688	456	403	349	2869	1888	2699	493	2095	435	293	193	26	132	2440	14185	4808	3645	14291	315	49	168	20	123	330	306	378	68	220	3885	609	3885	4630	3625	404	445	297	350
ENSBTAG00000050984	0	0	0	0	0	0	0	0	0	0	0	0	0	0	0	0	0	0	0	0	0	0	0	0	0	0	0	0	0	0	0	0	0	0	0	0	0
ENSBTAG00000042648	0	0	0	0	0	0	0	0	0	0	0	0	0	0	0	0	0	0	0	0	0	0	0	0	0	0	0	0	0	0	0	0	0	0	0	0	0
ENSBTAG00000045052	0	0	0	0	0	0	0	0	0	0	0	0	0	0	0	0	0	0	0	0	0	0	0	0	0	0	0	0	0	0	0	0	0	0	0	0	0
ENSBTAG00000046522	0	0	0	0	0	0	0	0	0	0	0	0	0	0	0	0	0	0	0	0	0	0	0	0	0	0	0	0	0	0	0	0	0	0	0	0	0
ENSBTAG00000043114	0	0	0	0	0	0	0	0	0	0	0	0	0	0	0	0	0	0	0	0	0	0	0	0	0	0	0	0	0	0	0	0	0	0	0	0	0
ENSBTAG00000038205	0	0	0	0	0	0	0	0	0	0	0	0	0	0	0	0	0	0	0	0	0	0	0	0	0	0	0	0	0	0	0	0	0	0	0	0	0
ENSBTAG00000050670	0	0	0	0	0	0	0	0	0	0	0	0	0	0	0	0	0	0	0	0	0	0	0	0	0	0	0	0	0	0	0	0	0	0	0	0	0
ENSBTAG00000043825	0	0	0	0	0	0	0	0	0	0	0	0	0	0	0	0	0	0	0	0	0	0	0	0	0	0	0	0	0	0	0	0	0	0	0	0	0
ENSBTAG00000054073	0	0	0	0	0	0	0	0	0	0	0	0	0	0	0	1	0	0	0	0	0	0	0	0	0	0	0	0	0	0	0	0	0	0	0	0	0
ENSBTAG00000055095	216	335	238	107	139	152	6	51	273	178	160	41	166	10	67	14	16	54	122	17	102	11	91	276	387	303	75	298	132	23	114	140	108	332	317	332	353
ENSBTAG00000053214	0	0	0	0	0	0	0	0	0	0	0	0	0	0	0	0	0	0	0	0	0	0	0	2	0	2	0	0	0	0	0	0	0	0	0	0	0
ENSBTAG00000046327	0	0	0	4	1	5	1	3	0	0	0	0	0	0	0	0	0	0	2	0	1	0	0	2	0	0	0	0	0	0	0	0	0	0	4	0	0
ENSBTAG00000020022	2	1	1	935	561	1601	226	961	4	0	2	0	0	0	0	0	0	2	151	4	33	14	99	14	16	9	0	12	2	0	2	0	0	14	24	5	23
ENSBTAG00000050382	14	21	26	2	4	2	2	4	8	4	0	0	0	0	2	0	2	2	4	0	0	0	0	11	8	0	0	4	8	0	4	0	0	4	2	0	18
ENSBTAG00000043888	0	0	0	0	0	0	0	0	0	0	0	0	0	0	0	0	0	0	0	0	0	0	0	0	0	0	0	0	0	0	0	0	0	0	0	0	0
ENSBTAG00000046463	0	0	0	0	0	0	0	0	10	12	11	3	4	0	1	0	0	0	0	0	0	0	0	3	3	1	1	2	6	0	8	16	12	0	0	0	0
ENSBTAG00000011613	6223	4883	6672	2590	2984	2864	298	1590	9952	5026	5312	1000	4025	93	717	216	107	508	2897	472	2612	383	2780	10969	10671	11908	2507	9096	6484	694	4316	5697	4356	834	782	942	872
ENSBTAG00000049980	0	0	0	0	0	0	0	0	1	0	0	0	0	0	0	0	0	0	0	0	0	0	0	0	0	0	0	0	0	0	0	0	0	0	0	0	0
ENSBTAG00000044037	2	0	4	0	0	0	0	0	4	10	11	0	4	0	0	0	0	0	0	0	0	0	0	0	0	0	0	0	0	0	0	0	0	0	0	0	0
ENSBTAG00000043127	0	0	0	0	0	0	0	0	0	0	0	0	0	0	0	0	0	0	0	0	0	0	0	0	0	0	0	0	0	0	0	0	0	0	0	0	0
ENSBTAG00000051597	0	0	0	0	0	0	0	0	0	0	0	0	0	0	0	0	0	0	0	0	0	0	0	0	0	0	0	0	0	0	0	0	0	0	0	0	0
ENSBTAG00000009598	338	365	304	105	151	108	23	89	795	302	426	121	377	26	175	77	58	211	204	18	162	46	155	399	388	509	53	263	200	24	147	379	185	413	504	553	472
ENSBTAG00000029810	0	0	0	0	0	0	0	0	0	0	0	0	0	0	0	0	0	0	0	0	0	0	0	0	0	0	0	1	0	0	0	0	0	0	0	0	0
ENSBTAG00000046941	2	5	2	11	14	24	2	8	10	8	5	0	6	1	4	2	0	4	4	1	5	0	14	3	4	0	0	0	87	19	78	101	69	2	5	3	0
ENSBTAG00000014485	2	0	0	0	0	0	0	0	121	47	81	11	48	0	0	0	0	0	0	0	0	0	0	100	55	93	25	104	2490	339	2238	2745	2342	0	0	0	0
ENSBTAG00000002668	95	70	51	20	66	16	2	18	223	110	86	37	94	5	20	12	1	12	33	2	28	6	19	177	142	177	24	116	269	23	213	322	155	326	211	163	189
ENSBTAG00000013077	0	0	0	0	0	0	0	0	0	0	0	0	0	0	0	0	0	0	0	0	0	0	0	0	0	4	1	0	1	0	0	0	0	0	2	0	0
ENSBTAG00000021790	611	433	350	1808	1299	2150	362	1864	1310	589	586	157	576	76	396	149	111	505	621	65	376	94	426	277	324	308	39	191	520	61	343	601	425	283	179	302	219
ENSBTAG00000027867	0	0	0	8	18	21	6	8	10	8	1	0	4	2	6	0	0	0	0	0	0	0	0	2	0	1	0	2	0	0	1	0	0	0	2	4	0
ENSBTAG00000054253	0	0	0	1	0	4	2	0	0	0	0	0	0	0	0	0	0	0	0	0	0	0	0	2	0	0	0	0	0	0	0	0	0	0	0	0	0
ENSBTAG00000053700	0	0	0	0	0	0	0	0	0	0	0	0	0	0	0	0	0	0	0	0	0	0	0	0	0	0	0	0	0	0	0	0	0	0	0	0	0
ENSBTAG00000051806	0	8	2	0	0	1	0	0	2	2	0	0	0	0	0	0	0	0	7	0	6	0	0	0	0	0	0	0	0	0	2	0	0	0	0	0	0
ENSBTAG00000055024	0	0	0	0	0	0	0	0	1	1	0	0	3	0	0	0	0	0	2	0	0	3	0	0	0	0	0	0	0	0	0	0	0	0	0	0	0
ENSBTAG00000052962	0	0	0	0	0	0	0	0	0	0	0	0	0	0	0	0	0	0	0	0	0	0	0	0	0	0	0	0	0	0	0	0	0	0	0	0	0
ENSBTAG00000002015	39	62	52	63	72	46	23	43	907	560	459	115	473	3	26	7	3	20	161	13	107	28	125	247	273	245	76	224	100	14	57	109	65	360	307	252	235
ENSBTAG00000048589	0	0	0	0	0	0	0	0	0	0	0	0	0	0	0	0	0	0	0	0	0	0	0	0	0	0	0	0	0	0	0	0	0	0	0	0	0
ENSBTAG00000047417	0	0	0	0	0	2	0	0	0	0	0	0	0	0	0	0	0	0	0	0	0	0	0	0	0	0	0	0	0	0	0	0	0	0	0	0	0
ENSBTAG00000015712	0	0	2	0	0	0	0	0	0	0	6	0	0	0	0	0	0	0	0	0	0	0	0	0	0	0	0	0	1	0	2	0	0	0	0	0	0
ENSBTAG00000039066	0	0	0	0	0	0	0	0	0	0	0	0	0	0	0	0	0	0	0	0	0	0	0	0	0	0	0	0	0	0	0	0	0	0	0	0	0
ENSBTAG00000044784	0	0	0	0	0	0	0	0	0	0	0	0	0	0	0	0	0	0	0	0	0	0	0	0	0	0	0	0	0	0	0	0	0	0	0	0	0
ENSBTAG00000051658	0	0	0	0	0	0	0	0	0	4	0	0	0	0	0	0	0	0	8	0	0	0	0	0	1	10	0	1	4	0	4	0	0	24	14	26	27
ENSBTAG00000048206	10	7	2	0	0	1	2	6	22	6	8	4	2	0	0	0	0	0	8	0	1	0	2	15	3	4	0	6	5	0	3	6	0	29	7	46	41
ENSBTAG00000010587	3236	2855	2616	1426	1469	1559	257	1099	4658	2321	2378	567	2222	46	250	78	80	257	5496	575	3835	966	4833	1749	1576	1764	253	1099	1043	72	485	824	472	1390	1453	1579	1383
ENSBTAG00000049971	0	0	0	0	0	0	0	0	0	4	0	0	0	0	0	0	0	0	0	0	2	0	0	0	0	0	0	0	0	0	0	0	0	0	0	0	2
ENSBTAG00000001877	227	256	126	108	156	207	21	112	742	407	356	106	436	3	43	19	14	52	443	33	236	53	221	321	403	707	60	268	308	42	274	308	194	567	522	391	528
ENSBTAG00000051240	4	0	2	0	5	2	0	2	11	7	6	0	7	0	0	0	0	2	6	0	1	0	2	10	11	2	2	4	16	3	27	5	2	17	7	20	13
ENSBTAG00000016230	269	160	187	72	125	69	8	48	381	165	196	36	121	4	39	24	6	28	137	23	140	20	68	311	443	202	92	252	456	69	438	340	241	444	509	341	359
ENSBTAG00000049425	0	0	0	0	0	0	0	0	0	0	0	0	0	0	0	0	0	0	0	0	0	0	0	0	0	0	0	0	0	0	0	0	0	0	0	0	0
ENSBTAG00000045653	0	0	0	0	0	0	0	0	0	0	0	0	0	0	0	0	0	0	0	0	0	0	0	0	0	0	0	0	0	0	0	0	0	0	0	0	0
ENSBTAG00000048060	0	0	0	0	0	0	0	0	0	0	0	0	0	0	0	0	0	0	0	0	0	0	0	0	0	0	0	0	0	0	0	0	0	0	0	0	0
ENSBTAG00000044266	0	0	0	0	0	0	0	0	0	0	0	0	0	0	0	0	0	0	0	0	0	0	0	0	0	0	0	0	0	0	0	0	0	0	0	0	0
ENSBTAG00000045678	17	17	5	8	11	4	2	6	11	5	5	2	5	0	0	0	3	4	4	0	6	1	4	1	3	15	0	8	4	5	10	21	17	10	11	11	8
ENSBTAG00000021437	10	7	19	17	12	7	2	8	15	17	6	2	11	0	2	0	0	4	27	8	29	2	17	106	77	191	27	87	35	0	27	12	4	1060	702	754	665
ENSBTAG00000054002	0	0	0	1	0	3	0	2	2	1	0	0	0	0	2	0	0	2	0	0	0	0	0	0	0	1	1	0	0	0	0	0	0	1	1	0	0
ENSBTAG00000050883	0	2	0	0	0	0	0	0	0	0	0	0	0	0	0	0	0	0	0	0	0	0	0	0	0	0	0	0	0	0	0	0	0	3	1	10	6
ENSBTAG00000008555	29	46	61	15	30	24	6	27	32	13	19	8	20	0	8	0	0	6	82	9	40	8	37	147	183	432	23	145	72	10	68	53	33	1271	852	935	761
ENSBTAG00000003299	66	28	67	2	4	8	4	0	18	16	4	0	4	0	2	0	0	2	0	0	0	0	4	4	10	2	0	2	8	0	2	4	4	0	16	6	2
ENSBTAG00000035882	3	8	2	1	2	4	0	0	7	12	5	0	2	0	4	0	0	6	4	1	7	0	5	8	5	5	0	3	5	5	4	9	5	4	5	6	5
ENSBTAG00000024675	63	69	67	29	44	23	0	20	22	16	20	2	6	8	9	8	2	14	46	2	20	0	8	69	69	267	26	73	12	4	2	13	6	112	131	251	166
ENSBTAG00000051877	0	0	0	1	3	0	0	1	0	2	0	0	0	0	0	0	0	2	0	0	0	0	0	0	0	0	0	0	0	0	0	0	0	0	1	0	0
ENSBTAG00000026025	8	48	13	14	10	20	1	10	4	2	4	0	0	2	11	3	4	14	0	0	0	0	0	6	11	8	6	2	2	4	4	0	0	11	14	2	6
ENSBTAG00000000895	177	180	168	137	138	149	16	78	281	165	190	43	141	17	104	32	28	157	90	17	94	7	89	273	232	142	38	177	56	24	80	117	76	196	200	167	188
ENSBTAG00000000894	7784	4983	4525	15965	11088	16079	2943	14526	16850	9520	8469	1743	7239	5133	30542	4859	4989	18765	3718	424	2502	503	2497	4672	5399	5820	1030	3642	9442	1296	7849	10607	7035	3385	4353	3811	3585
ENSBTAG00000010018	1042	549	712	232	342	185	32	147	1165	518	525	91	465	30	186	78	42	176	462	59	259	53	195	1188	1738	688	322	1099	326	37	188	284	145	1398	1465	1147	1118
ENSBTAG00000047768	2484	2011	1433	24518	19243	33501	4796	23548	11389	5507	5419	1151	5160	1124	7247	2377	2033	7656	3006	230	1548	536	1946	1269	1531	2551	283	1146	7258	975	5680	8465	5832	2490	2209	2797	2624
ENSBTAG00000045931	2401	2423	2264	844	1099	916	150	702	4755	2224	2425	611	2549	72	406	122	94	423	3630	343	2308	586	3031	3477	3495	4369	689	2676	1672	223	1556	1734	1143	3157	3402	3451	3425
ENSBTAG00000053487	21	15	13	13	15	11	0	22	30	21	16	3	14	1	18	3	4	17	6	4	6	0	8	24	21	33	0	7	19	4	8	10	8	32	23	25	22
ENSBTAG00000038434	1789	2069	2101	677	854	813	119	486	2431	1153	1166	239	1021	123	532	159	78	373	907	81	574	71	530	2151	2193	1484	358	1303	1208	114	625	790	496	2401	2248	1725	1816
ENSBTAG00000006722	146	440	489	1273	714	1219	177	781	8	32	5	2	16	4	16	4	0	14	0	0	0	0	0	2	0	0	0	2	18	2	0	2	3	0	2	0	2
ENSBTAG00000046806	0	0	0	2	0	2	0	0	0	0	0	0	0	0	0	0	0	0	0	0	0	0	0	0	0	0	0	0	0	0	0	0	0	0	0	0	0
ENSBTAG00000042364	0	0	0	0	0	0	0	0	0	0	0	0	0	0	0	0	0	0	0	0	0	0	0	0	0	0	0	0	0	0	0	0	0	0	0	0	0
ENSBTAG00000051706	220	287	182	122	138	169	20	114	552	237	307	40	176	31	144	41	22	64	203	19	158	23	116	256	260	320	43	132	334	33	212	355	149	254	265	236	162
ENSBTAG00000003609	620	842	783	786	812	933	128	688	1293	775	852	169	776	69	458	126	118	444	599	43	258	67	364	562	594	832	148	446	727	68	463	693	399	825	726	693	819
ENSBTAG00000025062	87	144	136	18	17	26	1	18	288	168	230	37	163	6	14	8	4	18	32	2	8	12	14	471	540	549	130	439	51	4	26	35	29	53	62	85	93
ENSBTAG00000008047	48	17	24	3	0	12	0	6	37	10	43	12	21	0	0	0	0	2	45	13	32	6	23	43	34	41	12	28	70	3	50	53	19	15	29	25	11
ENSBTAG00000052760	51	37	23	7	6	13	0	12	117	35	38	7	46	0	0	0	0	0	86	13	52	8	51	57	66	50	15	48	63	10	49	120	48	34	27	56	27
ENSBTAG00000004549	422	329	295	366	284	333	80	312	663	373	381	52	300	20	246	81	58	220	167	25	101	26	123	347	407	344	93	226	402	80	329	523	345	394	451	430	338
ENSBTAG00000052015	0	0	0	4	0	0	0	0	2	0	4	0	0	0	0	0	0	0	0	0	0	0	0	0	2	2	0	0	0	0	0	0	0	0	1	0	1
ENSBTAG00000011028	628	523	445	624	518	669	147	637	1531	935	912	223	788	68	411	139	117	409	760	82	483	122	667	640	592	625	136	468	823	109	643	737	599	457	538	545	486
ENSBTAG00000017241	0	0	0	0	0	0	0	0	4	0	0	0	0	0	0	0	0	0	0	0	0	0	0	0	0	0	0	0	0	0	0	0	0	0	0	0	0
ENSBTAG00000000300	4	11	22	2	6	2	0	0	61	45	59	4	13	0	15	2	0	8	42	18	70	4	27	43	64	25	4	42	2	0	6	4	10	2	15	2	0
ENSBTAG00000053647	0	0	0	0	0	0	0	0	0	0	0	0	0	0	0	0	0	0	0	0	0	0	0	0	0	0	0	0	0	0	0	0	0	0	0	0	0
ENSBTAG00000015630	698	586	567	145	217	143	37	92	1282	541	672	84	434	24	127	30	26	124	329	49	327	37	180	900	921	509	204	716	571	93	575	751	431	828	1089	747	788
ENSBTAG00000051929	0	0	0	0	0	0	0	0	1	2	0	0	2	0	0	0	0	0	0	0	0	0	0	0	0	0	0	0	0	0	0	0	0	1	2	0	0
ENSBTAG00000002585	2445	1019	1195	101	117	74	9	47	6664	4967	3125	910	3568	8	63	20	18	46	28	6	27	4	29	1581	1871	1433	570	1939	255	20	111	169	105	214	411	188	159
ENSBTAG00000028938	0	0	2	0	0	0	0	0	0	2	2	2	5	0	0	0	0	0	0	0	0	0	0	0	0	0	0	0	0	0	0	0	0	0	0	0	0
ENSBTAG00000032003	28	14	26	18	36	24	6	28	3	7	4	0	6	2	19	10	2	9	16	0	2	2	2	18	30	148	5	47	10	0	2	11	2	36	54	99	70
ENSBTAG00000051404	0	0	0	0	0	0	0	0	1	0	1	0	2	0	0	0	0	0	0	0	0	0	1	0	2	0	0	0	0	0	0	1	0	0	0	3	0
ENSBTAG00000036411	0	1	0	0	0	2	0	0	0	0	0	0	0	0	0	0	0	0	0	0	0	0	0	0	0	0	0	0	0	0	0	0	0	0	0	0	0
ENSBTAG00000030019	0	1	0	0	0	0	0	0	0	0	0	0	0	0	0	0	0	0	0	0	0	0	0	0	0	0	0	0	0	0	0	0	0	0	0	0	0
ENSBTAG00000050876	0	0	0	0	0	0	0	0	0	0	0	0	0	0	0	0	0	0	0	0	0	0	0	0	0	0	0	0	0	0	0	0	0	0	0	0	0
ENSBTAG00000051239	186	248	349	84	157	141	23	86	559	318	274	63	282	9	106	32	26	113	69	17	82	23	86	387	419	356	80	236	268	29	144	194	104	649	557	408	395
ENSBTAG00000051103	0	0	0	0	0	0	0	0	0	0	0	0	0	0	0	0	0	0	0	0	0	0	0	0	0	0	0	0	0	0	0	0	0	0	0	0	0
ENSBTAG00000053698	0	0	0	0	0	0	0	0	0	0	0	0	0	0	0	0	0	0	0	0	0	0	0	0	0	0	0	0	0	0	0	0	0	0	0	0	0
ENSBTAG00000036367	17	15	16	5	7	13	4	5	53	21	11	16	29	0	5	1	9	13	17	3	5	0	3	35	35	19	12	15	20	0	4	16	5	45	38	23	16
ENSBTAG00000029828	19	22	47	2	12	11	0	7	60	18	19	2	19	0	8	4	6	15	7	2	14	0	7	37	22	22	8	20	19	4	4	10	4	58	29	24	28
ENSBTAG00000051000	181	180	122	1059	857	1402	197	1119	627	283	335	74	296	87	468	166	111	584	172	11	109	42	132	119	110	262	19	88	304	55	275	320	274	143	127	176	189
ENSBTAG00000049983	2	3	11	9	6	3	1	10	9	5	9	2	2	0	2	0	0	1	1	1	6	4	1	5	11	6	1	10	0	0	2	4	2	23	15	13	7
ENSBTAG00000051552	0	0	0	0	0	0	0	0	0	0	0	0	0	0	0	0	0	0	0	0	0	0	0	0	0	0	0	0	0	0	0	0	0	0	0	0	0
ENSBTAG00000049740	0	12	13	0	0	9	2	4	0	0	10	5	6	0	0	2	2	2	0	0	0	0	1	0	0	13	5	13	0	0	0	47	5	0	0	29	7
ENSBTAG00000054758	0	110	129	0	0	46	11	35	0	0	91	25	102	0	0	10	12	27	0	0	0	14	42	0	0	73	37	120	0	0	0	115	49	0	0	187	212
ENSBTAG00000020826	36	52	75	245	193	269	66	278	193	151	115	9	111	2	14	2	0	5	31	1	16	0	8	91	97	91	21	54	41	4	26	39	6	74	107	120	71
ENSBTAG00000001726	0	0	0	0	0	0	0	0	0	0	0	0	0	0	0	0	0	0	0	0	0	0	0	0	1	0	0	0	0	0	0	0	0	0	0	0	0
ENSBTAG00000050059	0	0	0	0	0	0	0	0	0	0	0	0	0	0	0	0	0	0	0	0	0	0	0	0	0	0	0	0	0	0	0	0	0	0	0	0	0
ENSBTAG00000053104	0	0	0	0	0	0	0	0	0	0	0	0	0	0	0	0	0	0	0	0	0	0	0	0	0	0	1	0	0	0	0	0	0	0	0	0	0
ENSBTAG00000052491	39	60	44	8	14	9	0	6	20	18	9	0	7	0	6	0	0	6	20	0	12	2	18	43	47	65	19	36	40	2	13	15	23	210	246	185	173
ENSBTAG00000051474	0	0	0	0	0	0	0	0	0	0	0	0	0	0	0	0	0	0	0	0	0	0	0	0	0	0	0	0	0	0	0	0	0	0	0	0	0
ENSBTAG00000050902	6	11	8	0	4	6	2	0	0	2	0	0	0	0	0	0	1	2	0	0	0	0	0	6	1	8	2	0	3	0	5	6	7	17	3	21	7
ENSBTAG00000051767	74	57	71	106	89	79	8	92	200	109	76	34	86	359	2053	391	393	1393	32	2	15	5	24	105	109	48	31	93	71	9	92	74	47	60	108	54	50
ENSBTAG00000015848	367	252	249	461	418	485	79	365	854	487	454	76	444	1942	11469	1964	1792	7003	123	12	87	10	112	414	360	384	90	254	305	56	197	319	224	303	324	256	269
ENSBTAG00000046092	224	261	271	164	163	139	12	93	619	416	328	43	256	6	100	14	15	68	266	27	146	59	169	338	355	280	73	233	372	35	305	472	319	354	439	339	391
ENSBTAG00000046312	0	0	0	0	0	0	0	0	0	0	0	0	0	0	0	0	0	0	0	0	0	0	0	0	0	0	0	0	0	0	0	0	0	0	0	0	0
ENSBTAG00000052692	0	0	0	0	0	0	0	0	1	0	0	0	0	0	0	0	0	0	0	0	0	0	0	0	0	0	0	0	0	0	0	0	0	0	0	2	0
ENSBTAG00000045925	42	53	58	706	572	624	67	321	113	136	217	24	73	8	22	24	20	83	3	0	2	1	8	19	30	54	8	33	8	5	8	13	4	12	8	15	6
ENSBTAG00000018800	24216	49501	35078	18335	20523	25826	3080	16063	17136	10810	12779	2458	10394	1101	6697	1756	1699	6321	7283	693	4241	982	4910	16509	18095	28243	3979	13740	37597	3948	24065	43014	29476	21360	23997	25357	21682
ENSBTAG00000005607	55	20	13	12	15	4	2	4	39	22	10	0	4	0	12	5	2	3	39	2	21	0	8	102	90	36	10	40	93	10	82	57	30	123	153	121	117
ENSBTAG00000047376	449	498	400	1148	1082	1653	324	1644	992	567	508	139	610	72	437	153	167	557	474	47	257	64	342	255	359	538	70	279	693	122	706	930	549	497	440	512	483
ENSBTAG00000045565	342	160	227	51	81	55	7	44	177	175	127	20	112	2	20	12	6	14	97	14	67	4	50	330	353	89	82	232	71	8	39	71	34	119	144	57	77
ENSBTAG00000047545	1308	998	904	333	538	397	64	287	2294	1598	1047	283	1008	23	117	15	30	99	1966	325	1685	214	1685	1585	1993	1219	333	1130	302	38	220	202	101	615	915	497	450
ENSBTAG00000049525	0	0	0	0	0	0	0	0	0	0	0	0	0	0	0	0	0	0	0	0	0	0	0	0	0	0	0	0	0	0	0	0	0	0	0	0	0
ENSBTAG00000014798	4	6	11	35	18	26	2	14	24	25	28	4	13	0	1	0	2	2	95	2	39	6	35	49	74	124	33	96	22	2	12	10	2	170	296	273	322
ENSBTAG00000000902	1360	1511	1773	779	1132	927	134	853	2802	1509	1480	321	1389	164	1013	372	291	1172	790	61	713	112	539	2321	2482	2808	498	1579	1442	157	1055	1097	736	4882	4024	3532	3269
ENSBTAG00000006878	564	444	497	160	225	164	26	105	789	440	397	69	314	30	180	49	43	124	291	25	184	30	168	902	1015	691	173	709	597	66	477	629	338	1044	1294	871	801
ENSBTAG00000004110	49	33	38	10	13	10	0	8	51	54	43	2	20	0	2	1	0	5	15	2	9	3	12	49	65	42	12	42	54	6	40	37	25	52	68	49	63
ENSBTAG00000043870	0	0	0	1	5	0	0	0	0	0	0	0	0	0	0	1	1	1	0	0	0	0	0	0	0	0	0	0	0	0	0	0	0	6	0	2	2
ENSBTAG00000012163	13	15	12	874	729	1132	192	871	23	5	9	0	12	52	351	138	94	349	14	0	7	0	3	29	29	25	5	17	46	0	19	10	9	55	29	22	36
ENSBTAG00000012152	5856	7412	5745	2105	2402	1803	257	1246	7668	5208	4514	908	3693	198	857	227	202	656	3294	457	2503	371	2397	8683	8901	6729	1663	6078	7136	757	4904	7276	4998	7403	9572	7675	6855
ENSBTAG00000008492	669	628	700	275	345	268	27	208	1583	1192	893	163	805	36	289	72	61	222	445	65	360	62	399	1231	1381	1186	286	1029	641	64	498	396	299	1489	1498	1103	1030
ENSBTAG00000020512	10	3	7	1	6	3	0	3	10460	8229	3856	1233	5539	0	23	1	2	2	11639	1577	9060	1211	9769	23	5	20	2	4	3	0	0	8	4	4	10	4	0
ENSBTAG00000052224	0	0	0	0	0	0	0	0	3	11	10	3	4	0	0	0	0	0	4	0	9	0	2	0	0	0	0	0	0	0	0	0	0	0	0	0	0
ENSBTAG00000020513	0	0	0	0	0	0	0	0	0	0	25	0	2	0	0	0	0	0	4	0	0	0	1	0	0	0	0	0	0	0	0	0	0	0	0	0	0
ENSBTAG00000007708	69	97	98	35	82	28	8	13	49	41	10	4	16	4	7	4	4	13	18	0	7	0	7	274	211	88	35	94	88	2	75	77	40	135	133	64	89
ENSBTAG00000021351	1149	1053	1365	373	642	459	53	310	1875	1298	916	191	933	67	478	126	78	297	773	97	636	97	521	2809	2821	2029	627	2092	1024	161	926	853	559	2726	3163	1986	2057
ENSBTAG00000007626	436	320	301	208	212	171	47	118	286	220	189	22	181	10	73	21	12	26	958	48	389	71	392	1417	1805	3029	403	1342	339	80	286	301	196	5558	6185	5455	4582
ENSBTAG00000032209	0	0	2	3	0	2	0	2	0	0	4	0	2	0	0	0	0	0	3	0	4	0	3	1	10	23	2	9	2	0	0	0	0	27	24	15	29
ENSBTAG00000004879	663	1222	1219	858	1159	1006	183	848	2058	1565	1289	257	1086	326	1906	525	402	1491	554	62	497	93	599	1543	1723	1900	585	1853	581	87	421	736	582	995	1297	1223	1104
ENSBTAG00000007871	1782	1842	1543	1006	1099	936	136	667	4287	2669	2274	424	1773	102	604	182	148	566	1226	122	778	138	671	2354	2567	2109	471	1679	1779	254	1463	2009	1452	1584	2158	1955	1857
ENSBTAG00000051077	0	2	0	0	0	1	0	0	7	0	2	0	3	0	0	0	0	0	0	0	0	0	0	0	0	2	0	0	2	0	0	0	1	1	1	2	1
ENSBTAG00000007403	0	0	0	0	0	0	0	0	0	1	0	0	2	0	0	0	0	0	0	0	0	0	1	0	0	0	0	0	0	0	0	0	0	2	2	0	0
ENSBTAG00000016272	2	4	1	0	0	3	0	0	51	45	25	9	35	0	0	0	0	0	2	0	2	0	0	10	8	48	0	0	2	0	7	1	14	0	3	2	0
ENSBTAG00000043203	0	0	0	0	0	0	0	0	0	0	0	0	0	0	0	0	0	0	0	0	0	0	0	0	0	0	0	0	0	0	0	0	0	0	0	0	0
ENSBTAG00000042884	0	0	0	0	0	0	0	0	0	0	0	0	0	0	0	0	0	0	0	0	0	0	0	0	0	0	0	0	0	0	0	0	0	0	0	0	0
ENSBTAG00000042915	0	0	0	0	0	0	0	0	0	0	0	0	0	0	0	0	0	0	0	0	0	0	0	0	0	0	0	0	0	0	0	0	0	0	0	0	0
ENSBTAG00000011291	136	297	327	34	55	46	8	54	1621	1025	1047	237	908	8	40	23	11	45	920	151	898	132	696	725	992	829	210	723	1409	190	1203	1664	1186	446	472	456	359
ENSBTAG00000012863	0	2	6	20	38	38	7	23	35	33	30	0	25	9	65	12	16	52	0	0	4	0	0	4	4	6	3	6	265	17	99	168	128	1773	2296	1361	1572
ENSBTAG00000012861	166	12	21	116	115	141	35	108	92	123	14	3	9	33	140	49	58	165	33	18	42	0	2	213	161	61	21	69	324	55	300	290	152	412	438	304	266
ENSBTAG00000012860	1691	1440	1227	1966	1667	2544	370	1604	3081	2083	1657	268	1425	163	918	215	182	749	1596	156	891	177	1035	1836	1865	2221	321	1302	3395	401	2457	3843	2911	1710	2341	1898	1881
ENSBTAG00000054409	3	6	9	3	12	0	2	8	0	0	7	4	8	0	2	0	0	5	6	0	0	0	5	4	4	8	0	9	16	0	0	6	8	11	4	4	12
ENSBTAG00000012856	0	2	4	0	0	0	0	0	2	0	0	0	0	0	1	0	0	1	0	0	0	0	0	0	0	2	0	1	1	0	0	2	0	0	0	0	2
ENSBTAG00000040541	0	0	0	2	0	0	0	0	0	0	0	0	0	0	0	0	0	0	0	0	0	0	0	0	0	0	0	0	0	0	0	0	0	0	0	0	0
ENSBTAG00000018839	0	0	0	0	0	0	0	0	0	0	0	0	0	0	0	0	0	0	0	0	0	0	0	0	0	0	0	0	0	0	0	0	0	0	0	0	0
ENSBTAG00000007798	0	2	0	2	0	0	0	0	3	4	5	0	6	0	0	0	0	0	18	0	6	0	16	2	0	4	0	2	2	0	0	2	2	0	0	8	0
ENSBTAG00000007797	1056	1385	1251	1252	1079	1490	197	1055	2941	1712	1561	358	1520	239	1221	277	338	1251	1827	222	1161	281	1409	1470	1661	1650	324	1023	2004	201	1190	2343	1569	1268	1163	1318	1164
ENSBTAG00000054566	0	0	0	0	0	0	0	0	0	0	0	0	0	0	0	0	0	0	0	0	0	0	0	0	0	0	0	0	0	0	0	0	0	0	0	0	0
ENSBTAG00000012281	0	0	1	0	0	0	0	0	1	0	0	0	0	0	0	0	0	0	0	0	0	0	0	0	0	0	0	0	0	0	0	0	0	0	0	0	0
ENSBTAG00000012543	63	69	75	13	21	4	0	4	17	23	13	0	9	4	15	8	2	5	23	0	0	0	1	42	59	26	8	28	13	0	2	6	4	43	42	32	33
ENSBTAG00000022278	769	1196	631	966	985	1498	181	783	1005	485	685	140	590	60	372	160	105	342	438	56	262	63	346	617	553	927	185	524	1927	223	1200	2958	1704	802	1002	1158	875
ENSBTAG00000011310	251	422	371	10	17	25	0	14	576	441	361	71	286	16	47	13	16	66	27	0	4	1	11	151	161	138	37	131	178	22	110	145	137	161	193	152	137
ENSBTAG00000021026	1985	1493	1459	395	456	424	74	300	1529	927	774	135	597	51	247	66	55	297	295	43	216	32	256	1254	1294	877	272	818	1090	116	681	1133	691	742	785	778	701
ENSBTAG00000015801	2078	2068	2213	592	738	453	59	328	3674	2750	1667	447	1692	46	217	82	37	185	907	63	467	72	504	3321	4042	3080	738	2292	2190	248	1455	1423	1238	1544	2337	1757	1411
ENSBTAG00000033702	666	632	779	537	842	496	76	336	2090	1598	755	188	885	47	282	77	67	218	598	54	342	54	325	1927	1848	1620	386	1383	295	27	160	221	128	460	966	431	493
ENSBTAG00000049384	20	21	16	8	14	23	0	2	7	8	0	2	3	0	4	0	0	2	0	0	0	2	0	0	2	2	0	4	7	0	0	4	0	6	2	2	2
ENSBTAG00000001977	1291	1013	1077	403	455	420	56	350	2867	1170	1347	229	1165	53	230	91	48	177	959	95	848	119	649	1368	1381	1017	294	1133	1516	238	1255	1796	1148	1026	1071	1150	1015
ENSBTAG00000054350	0	0	0	0	2	0	0	0	0	0	0	0	0	0	0	0	0	0	0	0	0	0	0	0	0	1	0	0	0	0	0	0	0	0	0	0	0
ENSBTAG00000055120	219	178	173	25	46	46	2	38	201	178	116	13	90	4	23	9	0	28	68	6	50	6	40	310	386	181	75	222	253	31	154	167	119	117	164	110	110
ENSBTAG00000052786	6	0	0	0	0	0	0	0	0	0	0	0	0	0	0	0	0	0	0	0	0	0	0	0	0	0	0	0	6	0	0	0	0	0	0	0	0
ENSBTAG00000049792	1	0	2	0	2	2	0	0	0	0	0	0	0	0	8	0	0	0	0	0	0	0	0	0	0	0	0	0	0	0	0	0	0	0	0	0	0
ENSBTAG00000044574	0	0	0	0	0	0	0	0	0	0	0	0	0	0	0	0	0	0	0	0	0	0	0	0	0	0	0	0	0	0	0	0	0	0	0	0	0
ENSBTAG00000022255	246	204	264	6	11	12	11	14	93	58	48	3	14	3	67	24	10	70	540	98	636	86	597	11	22	6	2	11	118	17	101	86	58	11	19	15	14
ENSBTAG00000054703	0	0	0	0	0	0	0	0	0	0	0	0	0	0	0	0	0	0	0	0	0	0	0	0	0	0	0	0	0	0	0	0	0	0	0	0	0
ENSBTAG00000047326	0	0	0	172	149	224	34	165	0	0	0	0	0	0	0	0	2	4	0	0	0	0	0	0	0	0	0	0	5	2	12	18	9	0	3	1	5
ENSBTAG00000050199	0	0	0	2	2	2	0	0	0	0	0	0	0	0	0	0	0	0	0	0	0	0	0	0	0	0	3	1	0	0	0	0	0	0	0	2	0
ENSBTAG00000047411	0	0	2	12	7	16	0	15	8	3	4	0	3	2	5	0	2	8	0	0	0	0	0	33	18	24	23	52	0	0	0	0	0	0	0	0	4
ENSBTAG00000007654	1446	1169	1411	779	1395	1083	205	870	527	349	176	49	214	42	198	38	41	113	211	21	174	16	195	997	698	673	102	337	252	33	161	289	177	919	1096	1307	1315
ENSBTAG00000003290	51	32	26	51	79	49	7	29	205	129	95	20	73	0	7	0	0	5	44	16	35	3	31	158	155	69	36	116	44	11	20	34	22	312	373	242	207
ENSBTAG00000048907	0	0	0	0	0	0	0	0	0	0	0	0	0	0	1	0	0	0	0	0	0	0	0	0	0	0	0	2	0	0	0	0	0	0	0	0	0
ENSBTAG00000005496	444	313	304	95	139	95	6	90	684	415	297	80	329	12	60	18	7	15	247	17	184	29	167	588	639	538	108	399	322	33	274	334	237	932	1007	812	847
ENSBTAG00000054692	0	0	0	0	0	0	0	0	0	0	0	0	0	0	0	0	0	0	0	0	0	0	0	0	0	0	0	0	0	0	0	0	0	0	0	0	0
ENSBTAG00000005124	148	120	99	55	127	57	8	70	623	289	286	59	279	12	29	9	20	46	73	20	84	14	37	518	535	394	128	450	57	6	48	73	43	127	180	166	180
ENSBTAG00000053224	0	0	0	0	0	0	0	0	0	0	0	0	0	0	0	0	0	0	0	0	0	0	0	0	0	0	0	0	0	0	0	0	0	0	0	0	0
ENSBTAG00000046155	574	305	282	105	122	112	22	127	533	304	300	85	446	4	24	15	13	26	54749	6394	37944	9614	48417	104	85	76	14	83	52	2	23	66	36	49	65	70	73
ENSBTAG00000051287	5001	5204	3976	29517	23341	38483	5432	25230	10311	7499	6031	1265	5116	1113	5884	1523	1601	6493	5076	521	3229	713	3970	3499	4196	5939	910	2904	4457	599	3603	4571	3726	2622	3873	3476	3296
ENSBTAG00000002890	3027	3488	2928	1778	2241	2124	246	1284	5731	4278	3441	698	2735	233	1448	300	245	964	2801	324	1843	297	2256	4331	4723	5011	1091	3423	4132	620	3459	3755	3032	4679	5759	4267	3998
ENSBTAG00000016764	7177	5667	5146	2676	2953	3257	432	2218	15468	10885	7632	1766	7080	536	3580	790	744	2850	4198	509	2868	513	3341	9753	10039	9365	2104	6709	9019	1370	8193	10832	8281	6237	7775	5663	5640
ENSBTAG00000016769	1997	1906	1872	4287	4085	4478	669	3459	4187	2962	1891	376	1817	233	1778	358	356	1317	717	76	463	66	467	2070	2214	1915	484	1435	2376	287	1635	2156	1768	1649	1578	1281	1190
ENSBTAG00000016772	2414	2211	2174	1430	1749	1429	229	1182	5524	4106	2700	593	2616	148	892	224	210	805	2216	303	1897	271	1951	3271	3761	3449	807	2674	1402	202	1119	1190	1030	3194	3461	2330	2516
ENSBTAG00000038589	0	0	0	0	0	0	0	0	0	0	0	0	0	0	0	0	0	0	4	0	1	0	0	0	0	0	0	0	0	0	0	0	0	1	0	0	1
ENSBTAG00000002113	75	81	66	44	41	59	6	40	87	48	41	14	31	3	27	4	2	22	26	2	5	3	9	67	75	67	15	51	21	3	20	12	6	126	116	100	94
ENSBTAG00000043647	0	0	0	0	0	0	0	0	0	0	0	0	0	0	0	0	0	0	0	0	0	0	0	0	0	0	0	0	0	0	0	0	0	0	0	0	0
ENSBTAG00000005039	5928	7450	5951	5413	6150	7118	1085	4939	6372	5205	3323	726	2998	999	6184	1278	1466	5558	3716	535	3048	441	3442	5396	6114	6479	1409	4404	3490	359	2388	3399	2503	3479	4636	3366	2983
ENSBTAG00000005042	31	30	74	142	165	513	51	193	10	9	16	3	11	51	270	22	72	279	9	5	13	4	0	43	51	53	26	56	52	2	27	47	33	130	156	94	87
ENSBTAG00000052214	0	0	0	0	0	0	0	0	0	0	0	0	0	0	0	0	0	0	0	0	0	0	0	0	0	0	0	0	0	0	0	0	0	0	0	2	0
ENSBTAG00000015815	1328	773	731	218	219	243	26	106	193	153	101	13	81	10	50	10	5	34	2713	209	1249	202	952	5531	8283	11296	1263	4462	528	32	147	224	88	8260	13418	9708	10704
ENSBTAG00000015817	808	831	842	604	507	544	57	324	1356	1035	515	113	548	260	1699	194	335	1098	647	102	478	62	573	1255	1277	810	240	786	873	105	660	727	519	920	1138	664	691
ENSBTAG00000015820	494	771	534	1008	956	1276	206	909	1080	691	781	145	635	57	369	116	101	364	758	86	378	128	568	548	703	952	160	543	2028	231	1465	2788	1841	1315	1696	1638	1666
ENSBTAG00000049172	0	0	0	0	0	0	0	0	0	0	0	0	0	0	0	0	0	0	0	0	0	0	0	0	0	0	0	0	0	0	0	0	0	1	0	0	0
ENSBTAG00000039794	97	165	107	35	58	42	6	31	167	73	103	19	95	2	31	11	14	31	95	9	62	25	57	133	208	275	41	136	95	15	66	70	33	499	271	352	278
ENSBTAG00000039285	0	0	0	0	0	0	0	0	0	0	0	0	0	0	0	0	0	0	0	0	0	0	0	0	0	0	0	0	0	0	0	0	0	0	0	0	0
ENSBTAG00000005866	36	20	14	2	21	13	0	4	12	22	17	0	15	0	4	0	2	2	8	10	8	1	14	49	59	15	14	44	20	0	14	12	2	27	39	28	32
ENSBTAG00000047194	0	0	0	0	0	0	0	0	0	0	0	0	0	0	0	0	0	0	0	0	0	0	0	0	0	0	0	0	0	0	0	0	0	1	1	0	0
ENSBTAG00000043189	0	0	2	0	0	0	0	0	1	0	0	0	0	0	0	0	0	0	0	0	0	0	0	0	0	0	0	0	0	0	0	0	0	0	0	0	0
ENSBTAG00000017660	10	5	11	8	8	11	10	27	4	6	0	4	4	4	9	1	5	5	4	0	1	0	6	0	0	1	0	0	2	0	5	3	2	0	6	6	6
ENSBTAG00000050826	3	4	0	0	1	0	0	0	4	0	0	0	1	0	0	0	1	0	0	0	3	0	2	1	2	2	0	0	0	0	3	2	0	4	0	3	1
ENSBTAG00000046774	91	72	43	33	41	36	0	22	128	70	100	31	70	6	25	6	0	9	47	1	24	8	35	108	100	82	27	96	44	8	42	51	39	179	111	168	125
ENSBTAG00000046069	0	2	0	0	0	0	0	0	0	0	0	0	0	0	0	0	0	0	0	0	0	0	0	0	0	0	0	0	0	0	0	0	0	0	0	0	0
ENSBTAG00000054604	2	8	0	0	0	0	0	2	0	0	0	0	0	0	0	0	0	0	0	0	0	0	0	0	0	0	0	4	0	0	0	0	0	3	4	4	2
ENSBTAG00000048817	0	0	0	2	2	0	0	0	0	0	0	0	0	2	0	0	0	0	2	0	4	0	0	0	0	1	0	0	0	0	0	0	0	20	46	0	0
ENSBTAG00000050800	0	0	0	0	0	0	0	0	0	0	0	0	0	0	0	0	0	0	0	0	0	0	0	0	0	1	0	0	0	0	0	0	0	38	44	57	52
ENSBTAG00000011854	85	166	105	11	23	16	0	6	6	2	2	0	2	2	8	0	0	6	20	0	4	0	8	32	77	83	11	36	95	2	21	70	26	165	116	84	91
ENSBTAG00000031829	715	599	566	242	258	192	35	162	956	574	507	108	451	59	264	72	96	315	371	31	326	51	250	1397	1182	833	265	1016	492	89	393	532	355	835	935	783	771
ENSBTAG00000009282	397	317	316	77	106	104	10	82	155	91	64	19	122	10	94	20	19	74	149	12	72	17	61	525	709	427	145	411	258	24	215	285	156	163	155	148	112
ENSBTAG00000009287	2783	929	556	855	725	902	125	555	2305	1460	1008	223	876	81	417	58	109	499	9107	1153	6334	1403	6852	834	1081	1260	224	692	1747	254	1335	1600	1371	714	839	928	839
ENSBTAG00000009288	438	492	566	430	415	434	62	340	960	765	486	81	398	49	253	74	79	318	408	28	246	34	324	664	732	667	165	625	382	61	364	450	317	343	494	403	377
ENSBTAG00000051063	2	8	10	4	8	13	2	9	15	2	4	1	3	2	3	0	1	1	10	0	5	0	9	2	4	8	2	9	10	0	11	25	14	20	18	21	19
ENSBTAG00000025848	3602	3656	3460	1300	1006	1403	221	994	2659	1624	1307	378	1471	105	588	295	400	1491	994	80	455	106	487	1956	2315	3110	451	1589	1023	128	729	750	638	3491	3594	3567	3537
ENSBTAG00000018060	2627	2802	2822	6037	5732	5969	1089	4981	3446	2886	1650	408	1726	301	2070	426	513	1966	1512	214	1125	179	1263	2852	2862	4154	688	2241	2390	398	2280	2524	2261	2027	1963	1782	1687
ENSBTAG00000043112	0	0	0	0	0	0	0	0	0	0	0	0	0	0	0	0	0	0	0	0	0	0	0	0	0	0	0	0	2	0	0	0	0	0	0	0	0
ENSBTAG00000046555	486	301	414	156	162	114	20	74	231	178	86	19	112	4	45	7	0	50	875	66	318	51	430	1251	1914	2057	348	1262	309	29	159	167	109	4499	5191	3622	3489
ENSBTAG00000004706	387	467	428	136	150	118	18	108	734	582	389	85	348	14	73	14	15	115	406	59	501	56	417	487	606	615	178	540	256	30	211	211	149	576	732	541	569
ENSBTAG00000053600	0	0	0	0	0	0	0	0	0	0	0	0	0	0	0	0	0	0	0	0	0	0	0	0	0	0	0	0	0	0	0	0	0	0	0	0	0
ENSBTAG00000052110	0	2	4	0	2	0	0	0	2	0	0	0	1	0	0	0	0	1	1	0	2	0	2	2	0	3	0	2	0	0	0	0	0	7	7	5	1
ENSBTAG00000003184	4	44	46	2	3	2	4	1	2	3	2	0	0	0	4	0	0	2	2	2	0	0	2	21	20	21	7	22	0	0	0	0	0	8	20	12	35
ENSBTAG00000013244	1025	1117	1005	403	491	395	61	316	6522	5859	3975	899	3724	74	385	102	105	455	520	66	407	45	400	1236	1362	1223	329	927	1362	210	1037	1127	938	1217	1310	1039	950
ENSBTAG00000012954	45	45	74	20	21	25	4	14	662	821	370	113	448	4	26	0	0	10	34	10	40	6	31	80	54	116	22	56	92	10	49	48	22	173	109	67	94
ENSBTAG00000013250	184	394	2742	1967	2203	866	248	1178	524	371	281	81	346	4	35	12	4	51	178	22	133	16	286	7055	3298	7541	787	2521	1030	129	790	978	1406	58	39	51	70
ENSBTAG00000049284	0	0	0	1	0	1	0	0	0	0	0	0	0	0	0	0	0	0	0	0	0	0	0	0	0	2	0	1	0	0	2	0	0	0	0	0	0
ENSBTAG00000018496	1350	1303	1166	5135	4105	6231	872	4130	4097	3271	2339	517	2163	360	2118	395	598	2196	2161	268	1635	302	1833	1594	1793	2493	420	1322	2868	471	2461	2487	2350	1819	2276	1977	1734
ENSBTAG00000018498	696	925	882	1019	865	1088	153	801	1245	924	711	146	649	97	593	147	112	436	847	87	487	115	653	830	1142	1275	243	853	967	142	710	905	896	998	1187	911	909
ENSBTAG00000002768	463	409	487	250	264	306	39	160	1096	775	608	143	554	22	175	25	41	97	501	49	357	58	383	686	795	810	219	602	830	121	770	916	712	557	595	474	533
ENSBTAG00000004597	74	92	92	164	148	190	39	131	507	400	268	55	272	20	86	16	23	80	192	19	117	19	139	413	490	566	134	454	117	14	107	97	86	1389	1490	1185	1294
ENSBTAG00000004600	4915	4400	4545	2779	3131	2422	420	1791	8927	6670	4442	824	3551	297	1868	347	388	1472	4559	583	3263	430	3230	8232	8202	7342	2023	6288	6140	624	3929	4183	3566	5903	6878	4670	5146
ENSBTAG00000009024	240	341	353	115	143	60	11	56	131	97	63	26	70	10	44	2	11	33	106	6	52	6	68	391	538	417	127	319	134	10	66	69	65	546	526	389	462
ENSBTAG00000007788	1085	1197	1333	523	678	606	99	433	1494	1167	772	215	839	74	536	142	140	467	697	86	530	70	616	1679	2033	2269	462	1521	1130	150	906	1126	678	1857	1912	1483	1400
ENSBTAG00000045344	0	0	0	0	0	0	0	0	0	0	0	0	0	0	1	0	0	0	0	0	0	0	0	0	0	0	0	0	0	0	0	0	0	0	0	0	0
ENSBTAG00000008523	2113	1861	1903	455	616	370	59	205	2293	1684	1113	198	976	46	255	57	56	193	1264	131	781	88	783	2753	3034	2464	638	2100	1664	249	1273	1497	1144	2004	3153	2040	2242
ENSBTAG00000043177	0	0	0	0	0	0	0	2	5	0	0	0	0	0	0	0	0	0	0	0	0	0	0	1	2	3	0	0	0	0	0	0	0	0	2	0	0
ENSBTAG00000002561	402	492	555	127	173	140	17	90	775	766	377	108	398	13	48	22	11	39	880	114	584	77	583	1188	914	805	255	773	1762	320	1560	1608	1418	299	340	292	244
ENSBTAG00000002562	1154	1577	1355	922	971	1027	141	569	778	526	358	88	344	59	341	52	57	300	357	24	232	46	223	1053	1301	1310	226	830	1169	128	674	901	566	759	905	715	688
ENSBTAG00000002563	570	623	683	1644	1671	2975	470	2246	1235	1033	779	152	733	83	565	120	120	468	651	104	538	116	579	485	642	869	168	559	612	76	505	648	496	554	478	550	468
ENSBTAG00000002565	0	0	2	0	0	0	0	0	1	2	0	0	2	0	4	0	0	0	0	0	0	0	0	2	0	4	2	1	0	0	0	1	0	5	4	4	2
ENSBTAG00000002568	693	775	782	965	877	1145	157	787	1970	1516	1058	262	1059	126	803	158	171	711	666	87	547	88	577	1055	1187	1459	264	895	925	101	729	837	662	748	827	832	748
ENSBTAG00000054928	0	0	0	0	0	0	0	1	1	0	5	1	0	0	0	0	0	0	0	0	0	0	0	1	1	0	0	0	1	0	0	0	1	0	0	0	0
ENSBTAG00000013278	257	128	88	823	1214	1351	226	990	1084	1549	920	221	766	111	615	74	91	345	937	235	1152	205	1352	361	533	686	110	312	915	144	871	1235	1103	36	154	100	86
ENSBTAG00000016093	1226	1773	1616	1083	1103	1483	218	1014	567	374	351	71	258	49	376	125	76	364	184	17	126	12	75	1521	1668	1467	339	1131	5842	798	4605	6565	5037	650	872	702	701
ENSBTAG00000016095	301	449	461	373	343	393	50	320	422	316	200	33	200	19	129	34	43	94	310	21	180	34	174	618	655	683	173	539	1349	118	719	894	852	464	600	418	407
ENSBTAG00000016096	69	120	262	39	36	38	6	19	323	255	175	46	211	0	16	24	7	28	47	6	33	4	36	169	252	201	70	206	56	4	26	33	45	168	225	221	217
ENSBTAG00000016097	1	0	5	0	1	0	2	0	0	2	0	0	0	0	0	0	0	0	29	0	18	2	24	48	131	100	23	85	2	3	0	14	4	15	18	44	27
ENSBTAG00000013277	733	763	734	538	553	603	63	359	1540	1327	813	174	693	77	493	72	111	376	457	48	336	48	344	1200	1556	1807	275	1009	1089	126	899	1156	874	931	1222	846	726
ENSBTAG00000013279	466	168	236	9	22	10	2	20	216	141	80	36	131	0	36	0	9	36	331	56	351	29	320	56	55	50	16	49	37	7	9	24	20	66	83	72	59
ENSBTAG00000021100	164	145	150	483	466	572	66	406	169	113	95	23	82	76	465	64	116	456	40	10	82	4	53	213	217	226	41	146	62	10	21	74	34	192	174	164	121
ENSBTAG00000052071	0	0	0	0	0	0	0	0	0	0	0	0	0	0	0	0	0	0	0	0	0	0	0	0	0	0	0	0	0	0	0	0	0	0	0	1	1
ENSBTAG00000037728	0	0	0	0	0	32	0	0	0	0	0	0	0	0	0	0	0	0	0	0	0	0	0	2	0	0	0	2	0	0	0	0	0	0	0	0	0
ENSBTAG00000039391	89	63	95	28	53	27	5	15	1876	1864	2318	470	1708	8	26	8	7	45	141	22	75	24	75	158	158	182	42	130	60	11	51	73	45	141	146	100	108
ENSBTAG00000001507	144	55	43	10	24	23	0	4	5583	3379	2812	346	1677	2	27	13	12	50	28	0	45	2	23	114	194	61	25	90	32	2	39	71	40	81	83	51	85
ENSBTAG00000029798	0	0	0	0	0	0	0	0	0	0	0	0	0	0	0	0	0	0	0	0	0	0	0	0	0	0	0	0	0	0	0	0	0	0	0	0	0
ENSBTAG00000029878	0	0	0	0	0	0	0	0	0	0	0	0	0	0	0	0	0	0	0	0	0	0	0	0	0	0	0	0	0	0	0	0	0	0	0	0	0
ENSBTAG00000036403	0	0	0	0	0	0	0	0	0	0	0	0	0	0	0	0	0	0	0	0	0	0	0	0	0	0	0	0	0	0	0	0	0	0	0	0	0
ENSBTAG00000044594	0	0	0	0	0	0	0	0	0	0	0	0	0	0	0	0	0	0	0	0	0	0	0	0	0	0	0	0	0	0	0	0	0	0	0	0	0
ENSBTAG00000036374	0	0	0	0	0	0	0	0	0	0	0	0	0	0	0	0	0	0	0	0	0	0	0	0	0	0	0	0	0	0	0	0	0	0	0	0	0
ENSBTAG00000036420	0	0	0	0	0	0	0	0	0	0	0	0	0	0	0	0	0	0	0	0	0	0	0	0	0	0	0	0	0	0	0	0	0	0	0	0	0
ENSBTAG00000030013	0	0	0	0	0	0	0	0	0	0	0	0	0	0	0	0	0	0	0	0	0	0	0	0	0	0	0	0	0	0	0	0	0	0	0	0	0
ENSBTAG00000036376	0	0	0	0	0	0	0	0	0	0	0	0	0	0	0	5	0	0	0	0	0	0	0	0	0	0	0	0	0	0	0	0	0	0	0	0	0
ENSBTAG00000050832	0	0	0	0	0	0	0	0	0	0	0	0	0	0	0	0	0	0	0	0	0	0	0	0	0	0	1	0	0	0	0	0	0	0	0	0	0
ENSBTAG00000016399	67	73	93	8	2	2	0	2	2	2	2	0	2	2	6	0	0	0	8	4	6	0	0	115	99	54	6	54	22	2	9	18	2	33	14	2	2
ENSBTAG00000046286	105	71	97	50	57	32	6	30	98	60	38	8	77	8	35	10	8	56	47	14	45	4	60	95	90	89	18	78	83	17	61	79	38	153	136	93	98
ENSBTAG00000022962	4	4	6	0	0	0	0	0	112	85	44	8	58	0	0	0	0	0	0	0	0	0	0	0	0	2	0	0	0	0	0	0	0	2	0	0	0
ENSBTAG00000055147	0	0	0	0	0	0	0	0	0	0	0	0	0	0	0	0	0	0	0	0	0	0	0	0	0	0	0	0	0	0	0	0	0	0	0	0	0
ENSBTAG00000054140	0	0	1	3	1	0	0	2	1	2	2	0	0	1	0	0	0	0	1	0	2	2	0	0	1	0	0	0	0	0	2	1	0	1	0	0	1
ENSBTAG00000002996	2498	1506	1993	1387	1803	1287	225	1021	7502	3651	4185	825	3518	58	323	86	42	210	233	31	134	26	135	3923	4215	2252	914	3602	627	63	420	656	316	84	131	92	109
ENSBTAG00000044384	0	0	0	0	0	0	0	0	0	0	0	0	0	0	0	0	0	1	0	0	0	0	0	0	0	0	0	0	0	0	0	0	0	0	0	0	0
ENSBTAG00000045782	0	0	0	0	0	0	0	0	0	0	0	0	0	0	0	0	0	0	0	0	0	0	0	0	0	0	0	0	0	0	0	0	0	0	0	0	0
ENSBTAG00000054383	0	0	4	0	2	0	0	0	7	6	0	0	0	0	0	0	0	0	2	0	0	0	0	0	4	0	0	2	0	0	2	0	0	55	28	27	20
ENSBTAG00000054170	2	2	2	0	0	0	0	0	0	0	0	0	0	0	0	0	0	0	0	0	0	0	0	0	0	0	0	0	0	0	0	0	0	0	0	0	0
ENSBTAG00000005252	2	0	2	0	0	0	0	0	16	27	16	2	24	0	0	0	0	2	0	0	0	0	0	4	0	0	0	0	0	0	0	0	0	2	5	0	6
ENSBTAG00000052977	118	133	136	47	46	26	3	22	81	42	38	7	30	5	18	3	1	9	115	8	54	12	92	149	151	189	22	79	174	20	132	157	139	187	170	118	142
ENSBTAG00000013311	360	549	497	235	291	270	40	201	1114	719	621	143	541	6	45	12	8	46	1129	112	632	129	877	441	462	523	101	420	215	17	69	117	76	555	525	734	602
ENSBTAG00000053722	0	0	0	0	0	0	0	0	0	0	0	0	0	0	0	0	0	1	0	0	0	0	0	0	0	0	0	0	0	0	0	0	0	0	0	0	0
ENSBTAG00000008733	4526	3427	3771	1190	1166	971	123	671	2828	1802	1395	239	1340	66	395	79	88	387	1965	236	1354	294	1795	3134	3512	2360	504	1796	1747	137	1060	1473	1072	1113	1339	998	937
ENSBTAG00000048077	137	136	301	21	72	93	2	89	113	45	22	5	37	3	8	9	5	17	25	2	28	0	27	318	81	179	40	112	62	11	50	53	36	161	88	91	128
ENSBTAG00000052987	37	40	50	26	20	15	4	18	18	18	9	4	18	0	10	0	3	23	17	0	0	0	6	40	48	50	7	37	18	3	22	8	44	39	27	31	24
ENSBTAG00000043237	0	0	0	0	0	0	0	0	0	0	0	0	0	0	0	0	0	0	0	0	0	0	0	0	0	0	0	0	0	0	0	0	0	0	0	0	0
ENSBTAG00000054244	0	0	0	0	0	0	0	0	0	0	0	0	0	0	0	0	0	0	0	0	0	0	0	0	0	0	0	0	0	0	0	0	0	0	0	0	0
ENSBTAG00000054753	1	0	0	0	0	1	0	0	0	0	0	4	45	0	0	2	0	0	0	0	0	0	1	12	0	0	0	0	2	0	0	0	42	0	0	0	2
ENSBTAG00000055060	0	0	1	0	0	0	0	0	0	1	1	0	5	0	2	0	0	0	1	0	0	1	0	2	0	5	0	0	0	0	0	0	0	6	3	0	2
ENSBTAG00000053562	0	1	2	0	0	2	0	1	0	0	0	0	0	0	1	0	0	0	0	0	0	0	0	0	0	0	0	2	0	0	0	3	0	3	1	4	0
ENSBTAG00000017767	71	207	186	16	35	32	4	12	112	94	77	12	41	1	11	3	5	13	12	5	13	3	14	92	136	63	33	69	26	4	15	10	3	64	67	56	53
ENSBTAG00000017783	920	824	1034	250	266	277	28	156	974	759	639	166	617	54	260	61	81	221	883	127	526	88	680	1070	1200	1400	293	967	440	50	333	404	270	1081	943	785	843
ENSBTAG00000007493	8	10	20	2	0	6	0	2	9	14	5	0	1	4	2	4	0	0	0	0	0	0	0	4	11	11	3	10	8	0	2	2	3	16	21	26	12
ENSBTAG00000014943	3320	3047	2968	1014	1444	1096	139	596	5460	4285	2802	595	2543	304	1808	316	320	1207	2013	215	1524	200	1363	6014	6590	5402	1517	4831	4494	767	4378	4528	3450	4552	4993	3544	3198
ENSBTAG00000014945	486	399	505	228	287	235	12	139	642	414	325	73	235	11	74	25	26	106	241	31	132	11	143	626	887	344	153	613	439	48	275	413	250	300	474	275	302
ENSBTAG00000017761	1128	643	686	285	385	272	26	144	1282	849	763	148	539	67	336	77	75	278	577	92	516	65	464	1577	1542	674	292	1129	1096	153	959	1029	579	1028	1819	915	997
ENSBTAG00000017769	110	109	61	23	39	45	6	29	81	53	46	14	56	6	64	22	10	45	551	56	271	96	376	425	577	660	198	699	45	1	29	37	24	24	33	23	15
ENSBTAG00000017779	7420	4399	2519	5239	4384	6618	972	4862	12150	9463	6990	1752	7442	431	2115	425	453	2037	39866	3909	23503	5921	31553	1637	1732	2863	389	1358	2017	324	1744	2210	1599	2120	2209	2247	1930
ENSBTAG00000006122	4448	3470	3754	1339	1700	1333	178	975	7557	4968	3932	845	3663	307	1739	382	344	1120	3262	461	2653	432	2653	6304	6707	4182	1492	5355	5017	739	4245	4155	2634	6055	7204	4506	4579
ENSBTAG00000029870	0	0	0	0	0	0	0	0	0	0	1	0	0	0	0	0	0	0	0	0	0	1	0	0	1	0	0	0	0	0	0	0	0	2	0	4	0
ENSBTAG00000029774	0	0	0	0	0	0	0	0	0	0	0	0	0	0	0	0	0	0	0	0	0	0	0	0	0	0	0	0	0	0	0	0	0	0	0	0	0
ENSBTAG00000005098	0	0	0	0	0	0	0	0	0	0	0	0	0	0	0	0	0	0	0	0	0	0	0	0	0	0	0	0	0	0	0	0	0	0	0	0	0
ENSBTAG00000013289	266	257	325	110	146	73	24	94	577	399	263	61	220	24	135	44	28	128	231	49	226	18	214	735	804	434	150	523	273	54	261	253	141	720	820	529	498
ENSBTAG00000044387	0	0	0	0	0	0	0	0	0	0	0	0	0	0	0	0	0	0	0	0	0	0	0	0	0	0	0	0	0	0	0	0	0	0	0	0	0
ENSBTAG00000045150	0	0	0	0	0	0	0	0	0	0	0	0	0	0	0	0	0	0	0	0	0	0	0	0	0	0	0	0	0	0	0	0	0	0	0	0	0
ENSBTAG00000053410	2	0	2	0	0	0	0	0	0	0	0	0	0	0	0	0	0	0	0	0	1	0	0	0	2	0	0	2	0	0	0	2	0	0	2	1	6
ENSBTAG00000003855	344	202	212	95	96	67	7	51	553	297	285	61	266	13	72	23	22	67	177	47	175	12	145	422	371	186	74	302	263	28	130	224	109	335	258	231	178
ENSBTAG00000023182	0	0	0	0	0	0	0	0	5	8	25	2	16	2	2	0	0	0	0	0	0	0	0	2	10	0	4	8	3	0	0	2	0	29	17	5	8
ENSBTAG00000042163	0	0	0	0	0	0	0	0	0	0	0	0	0	0	0	0	0	0	0	0	0	0	0	0	0	0	0	0	0	0	0	0	0	0	0	0	0
ENSBTAG00000015858	1043	1647	1539	1316	1282	1411	208	1125	7179	4273	3199	990	3506	172	1043	221	232	1016	1120	125	751	126	993	1255	1591	2053	384	1095	1351	150	854	1291	959	953	1279	1290	1194
ENSBTAG00000015860	721	521	702	683	801	651	108	524	999	814	411	106	372	19	152	26	21	106	144	6	121	26	119	580	703	388	100	366	220	30	137	165	114	337	414	224	237
ENSBTAG00000019370	131	116	107	112	88	121	18	75	333	165	214	20	148	23	112	30	37	131	109	23	63	22	73	158	184	192	25	81	151	35	120	204	137	156	140	135	165
ENSBTAG00000031564	1344	1183	1170	746	724	846	131	648	3257	2158	1635	358	1805	167	1058	257	259	1015	774	107	579	112	613	1376	1613	1857	352	1060	1312	188	1040	1128	842	2018	1798	1576	1314
ENSBTAG00000049441	0	2	1	0	2	0	0	1	0	1	1	0	4	0	0	0	0	0	2	0	0	0	0	0	2	1	0	0	4	0	3	1	3	3	4	3	0
ENSBTAG00000039888	3787	3393	3116	1389	1528	1496	216	1086	4695	3506	2695	605	2678	164	886	173	213	759	956	95	528	125	678	3414	3825	3331	665	2452	860	118	666	767	545	2251	2591	2508	2176
ENSBTAG00000042654	2	2	3	0	0	2	0	0	7	0	1	0	1	2	0	0	0	0	1	0	0	0	0	0	6	10	0	5	2	2	0	0	0	14	2	13	11
ENSBTAG00000051604	0	0	3	2	0	4	0	0	10	0	0	0	2	1	9	2	4	13	0	0	2	0	0	2	4	0	0	0	0	0	0	0	0	10	11	12	15
ENSBTAG00000042614	0	0	0	0	0	0	0	0	0	0	0	0	0	0	0	0	0	0	0	0	0	0	0	0	0	0	0	0	0	0	0	0	0	0	0	0	0
ENSBTAG00000000172	307	96	39	0	1	0	0	0	0	0	0	0	2	110	522	201	103	408	1205	150	1063	309	1219	0	0	0	0	1	0	0	0	0	0	0	2	0	0
ENSBTAG00000013177	504	383	367	182	211	166	37	125	574	472	425	48	313	8	35	5	24	55	408	44	263	38	256	344	446	495	110	286	462	85	356	363	330	363	549	423	390
ENSBTAG00000013178	4	3	2	9	10	2	0	0	7	14	8	0	0	0	4	0	0	0	7	6	20	0	6	24	58	17	2	16	2	0	0	0	2	227	956	71	48
ENSBTAG00000039090	481	829	681	318	378	421	69	267	1847	771	808	164	706	36	165	45	55	153	585	46	254	97	509	393	452	573	110	377	339	24	181	259	227	642	652	797	875
ENSBTAG00000046659	0	0	0	0	0	0	0	0	0	0	0	0	0	0	0	0	0	0	0	0	0	0	0	0	0	0	0	0	0	0	0	0	0	0	0	0	0
ENSBTAG00000051200	0	0	0	0	0	0	0	0	0	0	0	0	0	0	0	0	0	0	0	0	0	0	0	0	0	0	0	0	0	0	0	0	0	0	0	0	0
ENSBTAG00000012980	131	142	169	343	311	368	74	349	549	271	282	56	202	8	66	10	9	52	108	14	78	19	62	256	247	363	63	219	126	13	72	102	80	301	306	330	307
ENSBTAG00000053434	0	2	9	5	6	3	3	0	0	0	0	0	4	0	0	0	0	0	2	0	0	0	0	5	12	4	1	17	2	0	2	2	0	4	6	2	8
ENSBTAG00000042991	0	0	0	0	0	0	0	0	0	0	0	0	0	0	0	0	0	0	0	0	0	0	0	0	0	0	0	0	0	0	0	0	0	0	0	0	0
ENSBTAG00000005852	12	3	7	7	6	7	4	8	4	0	2	0	4	0	2	0	0	0	1	0	0	0	0	21	17	16	6	7	0	1	2	1	0	14	7	2	21
ENSBTAG00000021843	696	689	655	481	567	671	81	453	1033	581	586	109	469	202	1484	349	354	1186	328	34	244	36	260	774	779	657	154	568	455	36	324	376	320	483	521	489	444
ENSBTAG00000054746	214	210	209	132	138	116	17	87	156	99	68	12	60	1	20	5	6	17	96	14	44	20	44	239	258	208	64	163	81	10	74	66	25	144	156	149	129
ENSBTAG00000049019	5	6	0	0	1	0	0	0	0	1	0	0	0	0	0	0	0	0	0	0	0	0	0	0	0	0	0	0	0	0	0	0	0	0	0	0	0
ENSBTAG00000053877	0	0	0	0	0	0	0	0	0	0	0	0	0	0	0	0	0	0	0	0	0	0	0	2	0	0	0	0	0	0	0	0	0	0	0	0	0
ENSBTAG00000013260	49	77	79	29	44	25	10	15	224	95	86	22	109	2	10	2	0	10	106	4	34	11	73	75	81	91	24	34	50	2	28	25	12	35	37	25	34
ENSBTAG00000046769	33	8	11	8	0	11	2	2	7	6	8	0	6	0	0	0	0	2	0	0	0	0	0	2	4	2	2	4	0	0	2	1	0	4	8	6	0
ENSBTAG00000038387	0	0	0	0	0	0	0	0	0	0	0	0	0	0	0	0	0	0	0	0	0	0	0	0	0	0	0	2	0	0	0	0	0	0	0	0	0
ENSBTAG00000045616	0	0	0	0	0	0	0	0	0	0	0	0	0	0	0	1	0	0	0	0	0	0	0	2	0	0	0	2	0	0	0	0	0	0	0	0	0
ENSBTAG00000047416	175	236	207	209	228	198	15	138	373	268	111	39	180	2	42	5	6	19	354	30	186	32	193	455	526	322	81	319	96	2	39	56	66	160	235	216	237
ENSBTAG00000015769	506	469	511	98	90	137	16	55	54	52	20	3	31	4	21	3	8	4	597	37	220	66	196	1262	1692	1825	331	1129	261	22	58	123	40	2145	2063	3257	2718
ENSBTAG00000036418	2	0	2	0	0	0	0	0	1	1	0	0	0	0	0	0	0	0	1	0	2	0	0	0	5	1	0	1	0	0	0	0	0	7	21	9	18
ENSBTAG00000003418	13496	9427	10203	4033	5592	3234	524	2389	5334	3329	2234	560	1996	244	1372	311	228	823	3509	284	1692	355	1750	26699	28558	21957	5907	20164	5501	550	3738	5776	3842	12412	16231	11950	12156
ENSBTAG00000002210	1333	1809	1487	867	865	935	158	741	3268	1906	1846	425	1756	114	664	140	179	609	1665	159	1109	206	1345	2367	2635	2896	488	1730	1513	185	1164	1465	1007	2894	2719	2334	2190
ENSBTAG00000002206	5	6	4	2	1	4	0	10	12	5	2	0	4	0	2	2	0	0	0	0	0	0	0	1	0	0	0	3	0	0	3	7	1	0	2	2	1
ENSBTAG00000052467	0	0	0	0	0	0	0	0	0	0	0	0	0	0	0	0	0	0	0	0	0	0	0	2	0	0	0	0	0	0	0	0	0	0	0	0	0
ENSBTAG00000048330	0	0	0	0	0	0	0	0	0	0	0	0	0	0	0	0	0	0	0	0	0	0	0	0	0	0	0	0	0	0	0	0	0	0	0	0	0
ENSBTAG00000003779	61	75	68	81	82	103	21	57	139	115	102	22	68	4	58	13	17	62	70	12	27	2	36	132	130	92	16	64	157	11	94	169	69	91	95	57	70
ENSBTAG00000045736	0	0	0	0	0	0	0	0	0	0	0	0	0	0	0	0	0	0	0	0	0	0	0	0	0	0	0	0	0	0	0	0	0	0	0	0	0
ENSBTAG00000035705	86	79	64	13	26	31	1	12	72	29	45	9	34	0	31	0	4	13	20	3	21	8	23	53	71	91	4	53	50	4	21	50	25	99	75	52	84
ENSBTAG00000045464	0	0	0	0	0	0	0	0	0	0	0	0	0	0	0	0	0	0	0	0	0	0	0	0	0	2	0	0	0	0	0	0	0	0	0	0	0
ENSBTAG00000046004	38	29	21	166	159	257	32	165	51	30	35	10	15	12	53	12	11	45	21	0	18	2	10	15	26	21	0	14	26	13	35	21	23	18	13	8	13
ENSBTAG00000007211	37	65	39	364	270	381	76	376	35	12	14	9	23	1865	10511	2217	2371	9462	14	0	3	0	8	18	10	24	6	10	5	0	10	14	10	19	13	13	14
ENSBTAG00000008839	361	182	233	129	157	97	20	103	281	157	145	32	132	7	50	36	19	68	225	36	144	27	168	407	571	230	144	426	293	34	209	269	129	306	405	260	254
ENSBTAG00000012729	329	283	421	167	251	233	36	190	340	163	136	32	136	14	66	21	19	30	229	44	205	49	295	297	338	249	93	390	114	13	54	79	40	135	96	99	74
ENSBTAG00000043869	0	0	0	0	0	0	0	0	0	0	0	0	0	0	0	0	0	0	0	0	0	0	0	0	0	0	0	0	0	0	0	0	0	0	0	0	0
ENSBTAG00000017948	17	21	30	2	3	4	0	2	13	2	0	0	3	0	0	0	0	2	6	0	0	0	0	6	11	4	0	6	1	2	4	0	2	14	4	10	9
ENSBTAG00000004151	0	0	0	0	0	0	0	0	0	0	0	0	0	0	2	0	0	0	0	0	0	0	0	0	0	0	2	2	0	0	0	0	0	0	0	0	0
ENSBTAG00000008911	302	249	294	131	149	152	19	109	353	286	191	31	140	23	99	19	16	74	177	19	111	9	164	552	547	438	119	345	212	29	172	172	114	364	386	295	225
ENSBTAG00000031523	264	228	312	182	164	124	27	71	214	229	119	29	128	4	43	15	19	49	99	19	90	11	120	311	325	220	61	262	149	27	117	82	134	228	320	153	195
[truncated: 25,608 more rows]

## Sheet: Phenotypic grouping
run_accession	sample_title
SRR10174861	Adipose
SRR10174862	Adipose
SRR10174863	Adipose
SRR10174870	Heart
SRR10174871	Heart
SRR10174872	Heart
SRR10174873	Heart
SRR10174874	Heart
SRR10174881	Kidney
SRR10174882	Kidney
SRR10174883	Kidney
SRR10174884	Kidney
SRR10174885	Kidney
SRR10174887	Muscle
SRR10174888	Muscle
SRR10174889	Muscle
SRR10174891	Muscle
SRR10174892	Muscle
SRR10174893	Liver
SRR10174894	Liver
SRR10174895	Liver
SRR10174896	Liver
SRR10174898	Liver
SRR10174899	Lung
SRR10174900	Lung
SRR10174901	Lung
SRR10174902	Lung
SRR10174903	Lung
SRR10174911	Rumen
SRR10174912	Rumen
SRR10174913	Rumen
SRR10174914	Rumen
SRR10174915	Rumen
SRR10174916	Spleen
SRR10174917	Spleen
SRR10174918	Spleen
SRR10174919	Spleen
