# Supplementary material for: Identification of key genes in bovine muscle development by co-expression analysis
Source: PeerJ. 2023 Apr 12;11:e15093. doi: 10.7717/peerj.15093 (PMC10105563; doi:10.7717/peerj.15093)
Supplement: Supplemental Information 7 [file peerj-11-15093-s007.xlsx]

## Sheet: magenta modules_enrich_GO_BP
ID	Description	GeneRatio	BgRatio	enrich_factor	pvalue	qvalue	geneID
bta05414	Dilated cardiomyopathy	25/424	90/6873	4.5	7.87383e-11	2.16323e-08	497015/281544/286816/280943/538957/534069/540307/506155/517059/535372/541308/100125240/618352/282714/100296004/506953/280765/539969/327703/282608/100337204/509779/518117/525482/510708
bta05410	Hypertrophic cardiomyopathy	23/424	86/6873	4.34	1.04909e-09	1.44112e-07	497015/281544/286816/280943/538957/534069/540307/506155/517059/535372/541308/511961/618352/282714/100296004/506953/280765/539969/327703/282608/100337204/509779/518117
bta04261	Adrenergic signaling in cardiomyocytes	28/424	143/6873	3.17	3.23213e-08	2.95995e-06	497015/281544/286816/540307/538100/618204/787607/782110/100125240/618352/282714/100296004/512943/282162/525416/530719/617095/539969/327703/282608/100337204/509779/518117/510026/537960/515161/525482/510708
bta05412	Arrhythmogenic right ventricular cardiomyopathy	17/424	74/6873	3.72	1.72369e-06	0.000114999	540307/506155/517059/535372/541308/506953/508151/280765/780777/539969/327703/282608/100337204/509779/518117/539375/536607
bta04260	Cardiac muscle contraction	18/424	83/6873	3.52	2.09289e-06	0.000114999	497015/281544/286816/540307/618352/282714/100296004/338086/528555/539969/327703/282608/100337204/509779/518117/510026/537960/515161
bta04922	Glucagon signaling pathway	19/424	97/6873	3.18	5.45739e-06	0.000249891	327664/505472/511961/286852/512571/540682/515067/506544/407109/786335/616576/513483/506812/282162/525416/530719/617095/510708/515338
bta01200	Carbon metabolism	19/424	108/6873	2.85	2.73866e-05	0.00107487	507517/509002/512571/505103/507476/515067/506544/407109/515902/614302/525813/281235/788926/280808/616576/513483/535653/280682/509566
bta04911	Insulin secretion	16/424	83/6873	3.12	3.70758e-05	0.00127326	282029/534180/408008/532060/616576/282162/525416/530719/100337204/509779/510026/537960/515161/525482/510708/538996
bta04020	Calcium signaling pathway	30/424	225/6873	2.16	4.53411e-05	0.0013841	286799/615428/540307/282478/100139857/515924/541008/286852/100125240/540682/281970/618262/338035/536132/533378/521257/404193/533929/327677/528555/508394/282162/525416/530719/617095/100337204/509779/518117/525482/510708
bta00500	Starch and sucrose metabolism	9/424	30/6873	4.86	5.30817e-05	0.00145835	327664/505472/515366/788926/786335/280812/280808/616576/539625
bta04921	Oxytocin signaling pathway	22/424	144/6873	2.48	6.27382e-05	0.00156696	100139857/282041/511961/286852/107131237/533378/515421/512254/614969/538479/327677/282162/525416/530719/617095/539969/327703/282608/100337204/509779/525482/510708
bta00010	Glycolysis / Gluconeogenesis	12/424	57/6873	3.41	0.000144616	0.00331094	512571/507476/515067/506544/407109/788926/280808/616576/513483/533785/509566/618607
bta04971	Gastric acid secretion	13/424	72/6873	2.93	0.000389512	0.0082318	533378/522184/521257/281067/282162/525416/530719/617095/510026/537960/515161/525482/510708
bta00230	Purine metabolism	18/424	123/6873	2.37	0.000495763	0.00972889	522509/281975/524624/512222/281970/536409/614149/616992/281363/504454/533000/533096/506087/512748/280715/784089/525482/510708
bta01230	Biosynthesis of amino acids	12/424	70/6873	2.78	0.00104845	0.0192032	507517/509002/512571/505103/507476/515067/506544/281235/539159/280682/513608/509566
bta04974	Protein digestion and absorption	15/424	103/6873	2.36	0.0015067	0.0258716	540307/536818/282353/414350/337897/536741/782166/407142/513668/515435/287013/282416/510026/537960/515161
bta04022	cGMP-PKG signaling pathway	20/424	161/6873	2.01	0.00202696	0.0327578	540307/282478/282041/533330/286852/100125240/781956/533378/282714/100296004/512254/617095/100337204/509779/518117/510026/537960/515161/525482/510708
bta04925	Aldosterone synthesis and secretion	13/424	93/6873	2.27	0.00438285	0.0668961	540245/528390/282162/525416/530719/617095/100337204/509779/510026/537960/515161/525482/510708
bta04390	Hippo signaling pathway	18/424	151/6873	1.93	0.00519245	0.0750819	520730/511308/789600/538957/534069/526771/536560/520101/782110/618586/539545/524255/538536/538507/780777/282637/507682/519937
bta04713	Circadian entrainment	12/424	87/6873	2.24	0.00677323	0.0886122	100139857/533330/536132/614969/614283/618399/282162/525416/530719/617095/525482/510708
bta04912	GnRH signaling pathway	12/424	87/6873	2.24	0.00677323	0.0886122	541008/512943/286883/280839/282162/525416/530719/617095/100337204/509779/525482/510708
bta05144	Malaria	8/424	47/6873	2.76	0.00735833	0.0918911	280943/282602/538957/534069/529759/281249/444863/280828
bta00051	Fructose and mannose metabolism	6/424	32/6873	3.04	0.0122383	0.146188	506544/534928/407183/788926/513483/509566
bta04978	Mineral absorption	8/424	53/6873	2.45	0.0150346	0.153528	540307/518976/613358/768319/510026/537960/515161/613998
bta04725	Cholinergic synapse	13/424	108/6873	1.95	0.0150724	0.153528	613605/528741/281884/538479/618399/282702/282162/525416/530719/100337204/509779/525482/510708
bta04930	Type II diabetes mellitus	7/424	43/6873	2.64	0.0151042	0.153528	280943/282359/512571/532060/788926/616576/538996
bta04910	Insulin signaling pathway	15/424	132/6873	1.84	0.0155348	0.153528	533171/282359/100139988/327664/505472/511961/513859/784877/540682/788926/786335/616576/513483/617095/515338
bta04916	Melanogenesis	12/424	97/6873	2.01	0.0156469	0.153528	511308/789600/407219/524255/538536/538507/282162/525416/530719/617095/525482/510708
bta04024	cAMP signaling pathway	21/424	210/6873	1.62	0.0188611	0.17565	281553/616503/282041/100125240/524624/512222/280839/614283/281067/282162/525416/530719/617095/100337204/509779/518117/510026/537960/515161/525482/510708
bta05230	Central carbon metabolism in cancer	9/424	66/6873	2.21	0.0191802	0.17565	515924/512571/515067/506544/407109/281235/788926/616576/404193
bta01250	Biosynthesis of nucleotide sugars	6/424	36/6873	2.7	0.0213848	0.185272	281564/534594/788926/280808/616576/523154
bta01232	Nucleotide metabolism	10/424	79/6873	2.05	0.022612	0.185272	616992/281363/504454/533000/533096/506087/509965/512748/280715/784089
bta04068	FoxO signaling pathway	14/424	126/6873	1.8	0.0227049	0.185272	538957/534069/282359/515928/511961/512943/508124/535311/505463/112446032/513776/510244/615342/539020
bta04976	Bile secretion	9/424	68/6873	2.15	0.0229283	0.185272	511743/535293/281067/510026/537960/515161/281008/525482/510708
bta00520	Amino sugar and nucleotide sugar metabolism	7/424	47/6873	2.41	0.0238846	0.187485	281564/516214/788926/280808/616576/523154/536960
bta00030	Pentose phosphate pathway	5/424	28/6873	2.89	0.0264082	0.196089	507517/506544/280808/513483/509566
bta04392	Hippo signaling pathway - multiple species	5/424	28/6873	2.89	0.0264082	0.196089	520730/526771/536560/520101/519937
bta04970	Salivary secretion	10/424	82/6873	1.98	0.028535	0.206306	286845/533330/536132/327677/617095/510026/537960/515161/525482/510708
bta04931	Insulin resistance	12/424	106/6873	1.84	0.0294289	0.207313	280943/534649/282359/327664/505472/505901/511961/784877/783217/786335/506812/515338
bta00040	Pentose and glucuronate interconversions	4/424	20/6873	3.24	0.0314504	0.210746	511743/281564/617564/618607
bta00100	Steroid biosynthesis	4/424	20/6873	3.24	0.0314504	0.210746	526535/616694/514745/533726
bta04371	Apelin signaling pathway	14/424	132/6873	1.72	0.0323338	0.211507	540307/100139857/616503/511961/536132/533378/618352/512254/618399/282637/617095/282143/525482/510708
bta04934	Cushing syndrome	15/424	148/6873	1.64	0.0388352	0.248127	511308/789600/528390/524255/538536/538507/505691/533526/282162/525416/530719/100337204/509779/525482/510708
bta04728	Dopaminergic synapse	13/424	125/6873	1.69	0.0438068	0.273531	529590/286852/787607/782110/512943/538771/614969/614283/618399/282162/525416/530719/617095
bta05416	Viral myocarditis	7/424	54/6873	2.1	0.0466595	0.284869	506155/517059/535372/541308/282714/100296004/534618
bta00430	Taurine and hypotaurine metabolism	3/424	14/6873	3.47	0.051025	0.304749	615582/614548/788719
bta04152	AMPK signaling pathway	12/424	116/6873	1.68	0.0532122	0.31105	282359/511961/787607/782110/506544/534928/407183/786335/513483/506812/281067/515338
bta05152	Tuberculosis	16/424	169/6873	1.53	0.0567153	0.323391	280943/282602/538957/534069/286852/512943/512242/515034/281249/514889/493720/514797/282162/525416/530719/617095
bta05205	Proteoglycans in cancer	18/424	196/6873	1.49	0.0576776	0.323391	511308/789600/280943/534069/529759/616503/282041/107131237/512943/524255/538536/538507/528415/281108/615310/282162/525416/530719
bta05022	Pathways of neurodegeneration - multiple diseases	36/424	451/6873	1.29	0.0638489	0.350833	541236/511308/789600/528410/514394/280943/282857/282478/100139857/530858/286852/534150/378474/536132/338079/281296/512943/781037/286883/518136/538771/614283/524255/538536/538507/493720/541161/504445/338086/282162/525416/530719/617095/100337204/509779/518117
bta04750	Inflammatory mediator regulation of TRP channels	10/424	95/6873	1.71	0.0669187	0.360491	505901/512943/286883/539334/282162/525416/530719/617095/525482/510708
bta00053	Ascorbate and aldarate metabolism	3/424	16/6873	3.04	0.0717101	0.368388	511743/281564/618607
bta04010	MAPK signaling pathway	24/424	285/6873	1.37	0.0728972	0.368388	286799/280943/538957/534069/616503/286852/528390/512254/281296/512943/519251/286883/539334/505463/528415/404193/533929/507319/615727/539969/327703/282608/100337204/509779
bta00330	Arginine and proline metabolism	6/424	48/6873	2.03	0.0729481	0.368388	505916/536132/538944/286822/783525/513608
bta04929	GnRH secretion	7/424	60/6873	1.89	0.0745822	0.368388	280839/534180/408008/614969/532060/100337204/509779
bta04218	Cellular senescence	14/424	149/6873	1.52	0.0750891	0.368388	538957/534069/282478/616503/286852/512943/286883/282261/520157/505463/280828/513678/533526/617095
bta05032	Morphine addiction	9/424	86/6873	1.7	0.0819177	0.391697	522509/524624/512222/281970/614969/618399/282237/525482/510708
bta04060	Cytokine-cytokine receptor interaction	22/424	261/6873	1.37	0.0826915	0.391697	617439/280943/538957/534069/281422/614367/281860/539334/281249/508932/514889/282257/540517/514933/280828/514803/100848228/408019/539108/100140488/507682/282131
bta05132	Salmonella infection	20/424	236/6873	1.37	0.0909411	0.419934	280943/282602/616503/282041/616366/515552/513301/514106/512943/286883/518136/538771/281249/282646/528415/787862/493720/618488/280828/101906089
bta04114	Oocyte meiosis	11/424	114/6873	1.56	0.092262	0.419934	515399/286852/100848466/512943/533526/282162/525416/530719/617095/525482/510708
bta00260	Glycine, serine and threonine metabolism	5/424	40/6873	2.03	0.0974559	0.419934	509002/505103/515067/539159/533785
bta00240	Pyrimidine metabolism	6/424	52/6873	1.87	0.098913	0.419934	616992/281363/504454/533096/506087/509965
bta05415	Diabetic cardiomyopathy	17/424	197/6873	1.4	0.0996348	0.419934	538957/534069/534649/282359/282478/100125240/507367/407109/338079/512943/786335/504502/338086/282162/525416/530719/518117
bta00052	Galactose metabolism	4/424	29/6873	2.24	0.100253	0.419934	506544/788926/616576/523154
bta00630	Glyoxylate and dicarboxylate metabolism	4/424	29/6873	2.24	0.100253	0.419934	509002/515902/614302/280682
bta04066	HIF-1 signaling pathway	10/424	103/6873	1.57	0.10197	0.419934	507476/506544/407183/407109/514889/788926/282162/525416/530719/509566
bta05226	Gastric cancer	13/424	143/6873	1.47	0.102409	0.419934	511308/789600/538957/534069/505463/524255/538536/538507/404193/533929/780777/282637/533526
bta00620	Pyruvate metabolism	5/424	41/6873	1.98	0.105689	0.421087	512571/407109/525813/618607/515338
bta05142	Chagas disease	10/424	104/6873	1.56	0.106985	0.421087	280943/282602/538957/534069/782110/512943/514889/493720/280828/281036
bta04972	Pancreatic secretion	9/424	91/6873	1.6	0.107289	0.421087	286845/281067/327677/518117/510026/537960/515161/525482/510708
bta04919	Thyroid hormone signaling pathway	11/424	118/6873	1.51	0.110731	0.428478	789600/534649/100125240/506544/282714/100296004/494549/518117/510026/537960/515161
bta00340	Histidine metabolism	3/424	20/6873	2.43	0.122069	0.463224	515950/783525/509432
bta00920	Sulfur metabolism	2/424	10/6873	3.24	0.123083	0.463224	280946/536409
bta05202	Transcriptional misregulation in cancer	15/424	176/6873	1.38	0.125866	0.467298	511037/526104/511371/528877/511206/533379/407219/512254/615458/282261/510459/505463/280828/505691/539020
bta04360	Axon guidance	15/424	177/6873	1.37	0.13021	0.476981	789600/520004/512652/524464/785942/616503/282041/286852/525946/507319/539332/282162/525416/530719/618227
bta04217	Necroptosis	12/424	136/6873	1.43	0.132984	0.480732	507234/280943/282478/327664/505472/514889/282257/618489/493720/282162/525416/530719
bta04964	Proximal tubule bicarbonate reclamation	3/424	21/6873	2.32	0.136244	0.486122	510026/537960/515161
bta00760	Nicotinate and nicotinamide metabolism	4/424	33/6873	1.96	0.143147	0.502685	616992/281363/504454/327677
bta04727	GABAergic synapse	8/424	84/6873	1.54	0.145195	0.502685	407118/537873/618399/282237/100337204/509779/525482/510708
bta04918	Thyroid hormone synthesis	7/424	71/6873	1.6	0.146376	0.502685	281553/282646/510026/537960/515161/525482/510708
bta00534	Glycosaminoglycan biosynthesis - heparan sulfate / heparin	3/424	22/6873	2.21	0.150949	0.507086	540355/617069/532099
bta05417	Lipid and atherosclerosis	16/424	196/6873	1.32	0.152152	0.507086	541236/282123/280943/282041/286852/538270/512943/286883/512242/281249/282646/280828/282162/525416/530719/617095
bta05207	Chemical carcinogenesis - receptor activation	15/424	182/6873	1.34	0.153194	0.507086	511743/100848466/282646/506093/533929/511716/535293/507988/504769/282702/100337204/509779/539020/525482/510708
bta04657	IL-17 signaling pathway	8/424	86/6873	1.51	0.15946	0.521542	507234/280943/512943/526639/282646/493720/280828/100140488
bta00280	Valine, leucine and isoleucine degradation	5/424	47/6873	1.72	0.161664	0.522531	515902/614302/407767/535508/317658
bta04530	Tight junction	13/424	156/6873	1.35	0.165048	0.527265	533297/533531/505242/282041/511961/782110/515421/539545/512975/517509/533725/281067/539988
bta04720	Long-term potentiation	6/424	61/6873	1.59	0.172299	0.544101	286852/614283/282162/525416/530719/617095
bta04310	Wnt signaling pathway	13/424	158/6873	1.33	0.176127	0.545122	511308/789600/282041/286852/618586/524255/538536/538507/541161/504445/282162/525416/530719
bta04960	Aldosterone-regulated sodium reabsorption	4/424	36/6873	1.8	0.179251	0.545122	537614/510026/537960/515161
bta05217	Basal cell carcinoma	6/424	62/6873	1.57	0.181579	0.545122	511308/789600/505463/524255/538536/538507
bta05321	Inflammatory bowel disease	6/424	62/6873	1.57	0.181579	0.545122	280943/538957/534069/614367/281249/514889
bta04961	Endocrine and other factor-regulated calcium reabsorption	5/424	49/6873	1.65	0.182543	0.545122	540307/510026/537960/515161/525482
bta04928	Parathyroid hormone synthesis, secretion and action	9/424	104/6873	1.4	0.191055	0.564408	505242/524624/512222/540245/513072/512254/532376/525482/510708
bta00650	Butanoate metabolism	3/424	25/6873	1.95	0.197713	0.577863	407767/535508/317658
bta05031	Amphetamine addiction	6/424	64/6873	1.52	0.200713	0.580171	286852/614283/282162/525416/530719/617095
bta04270	Vascular smooth muscle contraction	11/424	134/6873	1.33	0.203592	0.580171	282041/613547/505901/107131237/533378/515421/617095/100337204/509779/525482/510708
bta02010	ABC transporters	4/424	38/6873	1.71	0.204838	0.580171	281067/100336551/538996/281588
bta04620	Toll-like receptor signaling pathway	8/424	93/6873	1.39	0.214118	0.599931	280943/282602/512943/286883/512242/282257/493720/280828
bta05418	Fluid shear stress and atherosclerosis	11/424	136/6873	1.31	0.217108	0.599931	280943/529759/512254/512943/286883/282646/506093/281108/615310/617095/282131
bta04920	Adipocytokine signaling pathway	6/424	66/6873	1.47	0.220549	0.599931	280943/282359/505901/511961/506812/515338
bta04924	Renin secretion	6/424	66/6873	1.47	0.220549	0.599931	533330/286852/281970/617095/100337204/509779
bta04973	Carbohydrate digestion and absorption	4/424	40/6873	1.62	0.231408	0.623297	788926/510026/537960/515161
bta05134	Legionellosis	5/424	54/6873	1.5	0.238552	0.633294	280943/281249/515233/280828/615342
bta05170	Human immunodeficiency virus 1 infection	15/424	198/6873	1.23	0.23973	0.633294	507234/280943/541008/286852/281803/512943/286883/618399/493720/513678/539332/281036/617095/540693/616331
bta05140	Leishmaniasis	6/424	69/6873	1.41	0.251442	0.652457	280943/538957/534069/512943/514889/515233
bta05010	Alzheimer disease	26/424	366/6873	1.15	0.251733	0.652457	541236/511308/789600/528410/280943/282857/282478/286852/378474/536132/338079/536741/281296/518136/538771/524255/538536/538507/493720/541161/504445/338086/617095/100337204/509779/518117
bta00450	Selenocompound metabolism	2/424	16/6873	2.03	0.259164	0.660675	536409/539159
bta04723	Retrograde endocannabinoid signaling	11/424	142/6873	1.26	0.259713	0.660675	338079/512943/614969/614283/618399/282237/540007/100337204/509779/525482/510708
bta01523	Antifolate resistance	3/424	29/6873	1.68	0.264357	0.666317	280943/509002/281588
bta05235	PD-L1 expression and PD-1 checkpoint pathway in cancer	7/424	85/6873	1.33	0.269665	0.673517	282602/505901/286852/512943/286883/514889/536642
bta05323	Rheumatoid arthritis	7/424	86/6873	1.32	0.27943	0.678333	280943/538957/534069/281249/280828/281108/514368
bta04936	Alcoholic liver disease	10/424	130/6873	1.25	0.280571	0.678333	280943/511961/378474/512943/286883/512242/493720/280828/506812/515338
bta00020	Citrate cycle (TCA cycle)	3/424	30/6873	1.62	0.281469	0.678333	407109/281235/280682
bta00640	Propanoate metabolism	3/424	30/6873	1.62	0.281469	0.678333	515902/614302/515338
bta05204	Chemical carcinogenesis - DNA adducts	4/424	45/6873	1.44	0.30084	0.718711	511743/506093/535293/507988
bta04380	Osteoclast differentiation	9/424	119/6873	1.23	0.312529	0.7402	280943/534069/286852/407219/512943/286883/514889/282257/529346
bta04927	Cortisol synthesis and secretion	5/424	61/6873	1.33	0.323174	0.753915	528390/100337204/509779/525482/510708
bta01210	2-Oxocarboxylic acid metabolism	2/424	19/6873	1.71	0.329247	0.753915	281235/280682
bta00270	Cysteine and methionine metabolism	4/424	47/6873	1.38	0.329321	0.753915	280946/505916/505103/539159
bta04913	Ovarian steroidogenesis	4/424	47/6873	1.38	0.329321	0.753915	280839/281740/525482/510708
bta05143	African trypanosomiasis	3/424	33/6873	1.47	0.333216	0.753915	280943/282602/281249
bta05163	Human cytomegalovirus infection	15/424	213/6873	1.14	0.334784	0.753915	507234/280943/282041/541008/286852/281803/512943/286883/618399/493720/280828/281036/617095/525482/510708
bta04724	Glutamatergic synapse	8/424	107/6873	1.21	0.339544	0.758417	282353/286852/508124/535311/614283/618399/525482/510708
bta00980	Metabolism of xenobiotics by cytochrome P450	4/424	48/6873	1.35	0.343625	0.761342	511743/506093/535293/617564
bta04612	Antigen processing and presentation	5/424	63/6873	1.29	0.348056	0.764989	280943/281803/615930/281108/281036
bta00220	Arginine biosynthesis	2/424	20/6873	1.62	0.352266	0.766393	536132/513608
bta04550	Signaling pathways regulating pluripotency of stem cells	10/424	139/6873	1.17	0.354273	0.766393	511308/789600/281335/512943/524255/538536/538507/404193/528437/282131
bta00140	Steroid hormone biosynthesis	4/424	49/6873	1.32	0.357943	0.768283	511743/507988/504769/281740
bta04146	Peroxisome	6/424	79/6873	1.23	0.36089	0.768602	531027/506518/281235/535508/317658/511716
bta05200	Pathways in cancer	33/424	500/6873	1.07	0.366581	0.774718	511308/789600/286799/507234/538957/534069/282041/515924/407219/614367/514889/282257/282646/506093/618399/505463/524255/538536/538507/404193/533929/493720/280828/780777/282637/533526/282162/525416/530719/617095/536642/525482/510708
bta04933	AGE-RAGE signaling pathway in diabetic complications	7/424	96/6873	1.18	0.380596	0.792526	286799/280943/538957/534069/378474/512943/280828
bta05216	Thyroid cancer	3/424	36/6873	1.35	0.38482	0.792526	515924/505463/282637
bta04622	RIG-I-like receptor signaling pathway	5/424	66/6873	1.23	0.385541	0.792526	510923/280943/512943/493720/280828
bta00830	Retinol metabolism	4/424	51/6873	1.27	0.386546	0.792526	511743/507988/504769/281615
bta04061	Viral protein interaction with cytokine and cytokine receptor	6/424	82/6873	1.19	0.394596	0.803037	280943/281249/280828/408019/539108/100140488
bta04923	Regulation of lipolysis in adipocytes	4/424	52/6873	1.25	0.400794	0.804552	281553/533330/525482/510708
bta04064	NF-kappa B signaling pathway	7/424	98/6873	1.16	0.401197	0.804552	510923/507234/280943/505901/512242/505463/280828
bta04625	C-type lectin receptor signaling pathway	7/424	99/6873	1.15	0.411496	0.81727	280943/616503/286852/512943/514797/100140488/617095
bta04071	Sphingolipid signaling pathway	8/424	115/6873	1.13	0.415798	0.81727	280943/282041/787607/782110/781956/512943/529346/281588
bta00515	Mannose type O-glycan biosynthesis	2/424	23/6873	1.41	0.419438	0.81727	506466/541596
bta04977	Vitamin digestion and absorption	2/424	23/6873	1.41	0.419438	0.81727	505492/281588
bta04115	p53 signaling pathway	5/424	69/6873	1.17	0.422915	0.818242	538226/282261/505463/513678/533526
bta00480	Glutathione metabolism	4/424	54/6873	1.2	0.429098	0.819117	505916/281235/506093/615582
bta05169	Epstein-Barr virus infection	13/424	196/6873	1.08	0.434827	0.819117	507234/280943/617389/281803/512943/286883/282257/505463/407106/493720/506087/533526/281036
bta04137	Mitophagy - animal	5/424	70/6873	1.16	0.435293	0.819117	616503/530858/534150/407219/615342
bta05133	Pertussis	5/424	70/6873	1.16	0.435293	0.819117	280943/512943/280828/539332/617095
bta04350	TGF-beta signaling pathway	6/424	86/6873	1.13	0.439402	0.821224	280943/538957/534069/506721/507682/282131
bta04650	Natural killer cell mediated cytotoxicity	7/424	103/6873	1.1	0.45252	0.828062	534680/280943/404100/541008/286852/514889/282257
bta04730	Long-term depression	4/424	56/6873	1.16	0.457042	0.828062	100139857/533330/536132/614283
bta05214	Glioma	5/424	72/6873	1.13	0.459864	0.828062	505463/282162/525416/530719/617095
bta00563	Glycosylphosphatidylinositol (GPI)-anchor biosynthesis	2/424	25/6873	1.3	0.462207	0.828062	509680/506830
bta01040	Biosynthesis of unsaturated fatty acids	2/424	25/6873	1.3	0.462207	0.828062	539782/514788
bta04659	Th17 cell differentiation	7/424	104/6873	1.09	0.462701	0.828062	505901/286852/512943/614367/539334/514889/514933
bta05164	Influenza A	10/424	152/6873	1.07	0.464159	0.828062	510923/280943/511037/282478/280873/281249/514889/282257/493720/280828
bta04213	Longevity regulating pathway - multiple species	4/424	57/6873	1.14	0.470844	0.834569	511961/281719/525482/510708
bta00062	Fatty acid elongation	2/424	26/6873	1.25	0.48289	0.845016	539782/514788
bta04950	Maturity onset diabetes of the young	2/424	26/6873	1.25	0.48289	0.845016	503581/616576
bta04926	Relaxin signaling pathway	8/424	123/6873	1.05	0.49164	0.849879	286799/507053/532277/536132/512943/618399/525482/510708
bta04080	Neuroactive ligand-receptor interaction	21/424	334/6873	1.02	0.497385	0.849879	281553/507053/532277/615800/524064/281422/100533481/618262/338035/781956/540119/280839/521257/614283/282237/539769/281687/282177/282702/338070/282143
bta05161	Hepatitis B	10/424	156/6873	1.04	0.497626	0.849879	280943/538957/534069/541008/512943/286883/282257/493720/280828/533526
bta00983	Drug metabolism - other enzymes	4/424	59/6873	1.1	0.498042	0.849879	511743/511206/506093/509965
bta03320	PPAR signaling pathway	5/424	76/6873	1.07	0.507991	0.861506	525813/407767/515768/504502/506812
bta00982	Drug metabolism - cytochrome P450	3/424	44/6873	1.11	0.515978	0.869682	511743/506093/788719
bta04721	Synaptic vesicle cycle	5/424	77/6873	1.05	0.519761	0.870339	281511/407118/282353/282029/514368
bta04935	Growth hormone synthesis, secretion and action	7/424	110/6873	1.03	0.522704	0.870339	512943/286883/282261/100337204/509779/525482/510708
bta04512	ECM-receptor interaction	5/424	78/6873	1.04	0.53141	0.879505	529759/513362/506953/508018/407142
bta05165	Human papillomavirus infection	19/424	311/6873	0.99	0.553217	0.897833	511308/789600/280943/505242/532242/787607/782110/512571/280873/539545/506953/282257/524255/538536/538507/493720/407142/533526/514368
bta00410	beta-Alanine metabolism	2/424	30/6873	1.08	0.560483	0.897833	614548/783525
bta04141	Protein processing in endoplasmic reticulum	10/424	164/6873	0.99	0.5627	0.897833	541236/281546/530858/613927/281803/281373/282646/511008/281719/281036
bta00730	Thiamine metabolism	1/424	13/6873	1.25	0.563309	0.897833	280715
bta05225	Hepatocellular carcinoma	10/424	165/6873	0.98	0.570603	0.897833	511308/789600/538957/534069/777769/506093/505463/524255/538536/538507
bta01240	Biosynthesis of cofactors	8/424	132/6873	0.98	0.573331	0.897833	511743/281564/509002/527628/509965/618607/280715/784089
bta04664	Fc epsilon RI signaling pathway	4/424	65/6873	1	0.57565	0.897833	280943/512943/286883/529346
bta04015	Rap1 signaling pathway	12/424	200/6873	0.97	0.583384	0.897833	286799/528252/616503/512943/286883/404193/533929/507319/282637/617095/525482/510708
bta04611	Platelet activation	7/424	117/6873	0.97	0.589299	0.897833	528252/282041/533330/533378/512943/525482/510708
bta04150	mTOR signaling pathway	9/424	153/6873	0.95	0.608303	0.897833	511308/789600/280943/541106/524255/538536/538507/529235/514368
bta04640	Hematopoietic cell lineage	5/424	85/6873	0.95	0.609052	0.897833	280943/536741/508932/407106/327677
bta00061	Fatty acid biosynthesis	1/424	15/6873	1.08	0.615626	0.897833	515338
bta05218	Melanoma	4/424	69/6873	0.94	0.623439	0.897833	407219/505463/533929/282637
bta04510	Focal adhesion	11/424	189/6873	0.94	0.62451	0.897833	286799/528252/282041/107131237/616294/514106/533378/506953/528415/407142/615310
bta04110	Cell cycle	7/424	121/6873	0.94	0.625201	0.897833	538957/534069/505463/513678/510244/505691/533526
bta04630	JAK-STAT signaling pathway	9/424	156/6873	0.94	0.631769	0.897833	281422/614367/508932/514889/282257/281189/509056/514803/100848228
bta05223	Non-small cell lung cancer	4/424	70/6873	0.93	0.634842	0.897833	515924/538771/505463/536642
bta05145	Toxoplasmosis	6/424	105/6873	0.93	0.636223	0.897833	280943/538957/534069/512943/286883/514889
bta00910	Nitrogen metabolism	1/424	16/6873	1.01	0.63939	0.897833	513850
bta04658	Th1 and Th2 cell differentiation	5/424	88/6873	0.92	0.639964	0.897833	617389/505901/286852/512943/514889
bta04340	Hedgehog signaling pathway	3/424	53/6873	0.92	0.643633	0.897833	529947/516072/100336796
bta00250	Alanine, aspartate and glutamate metabolism	2/424	35/6873	0.93	0.645272	0.897833	509432/784089
bta00350	Tyrosine metabolism	2/424	35/6873	0.93	0.645272	0.897833	281413/508724
bta01524	Platinum drug resistance	4/424	72/6873	0.9	0.65697	0.897833	518976/517422/506093/493720
bta05033	Nicotine addiction	2/424	36/6873	0.9	0.660593	0.897833	614283/282237
bta04072	Phospholipase D signaling pathway	8/424	143/6873	0.91	0.664222	0.897833	616503/541008/504545/529346/618488/280828/525482/510708
bta05166	Human T-cell leukemia virus 1 infection	12/424	212/6873	0.92	0.664676	0.897833	280943/528252/538957/534069/282478/286852/513678/505691/533526/281036/525482/510708
bta01212	Fatty acid metabolism	3/424	55/6873	0.88	0.668548	0.897833	539782/504502/506812
bta05146	Amoebiasis	5/424	91/6873	0.89	0.669321	0.897833	280943/538957/534069/280828/513608
bta05224	Breast cancer	8/424	144/6873	0.9	0.67189	0.897833	511308/789600/100848466/505463/524255/538536/538507/533929
bta05100	Bacterial invasion of epithelial cells	4/424	74/6873	0.88	0.67818	0.897833	525427/780777/282637/615310
bta04670	Leukocyte transendothelial migration	6/424	110/6873	0.88	0.680782	0.897833	282041/541008/514106/512943/780777/512975
bta00670	One carbon pool by folate	1/424	18/6873	0.9	0.682611	0.897833	509002
bta05220	Chronic myeloid leukemia	4/424	75/6873	0.86	0.688438	0.897833	538957/534069/505463/529346
bta05219	Bladder cancer	2/424	38/6873	0.85	0.689637	0.897833	280828/282637
bta05213	Endometrial cancer	3/424	57/6873	0.85	0.692169	0.897833	505463/780777/282637
bta00532	Glycosaminoglycan biosynthesis - chondroitin sulfate / dermatan sulfate	1/424	19/6873	0.85	0.702242	0.897833	509328
bta04614	Renin-angiotensin system	1/424	19/6873	0.85	0.702242	0.897833	536741
bta04932	Non-alcoholic fatty liver disease	8/424	150/6873	0.86	0.715626	0.897833	541236/280943/511961/338079/783217/512943/280828/338086
bta00071	Fatty acid degradation	2/424	40/6873	0.81	0.716607	0.897833	504502/506812
bta00770	Pantothenate and CoA biosynthesis	1/424	20/6873	0.81	0.720662	0.897833	614548
bta04810	Regulation of actin cytoskeleton	11/424	204/6873	0.87	0.722392	0.897833	512652/616503/282041/107131237/514106/533378/506953/782315/404193/533929/539332
bta05012	Parkinson disease	14/424	258/6873	0.88	0.730932	0.897833	541236/514394/282857/282478/530858/338079/281296/518136/538771/338086/282162/525416/530719/617095
bta00590	Arachidonic acid metabolism	3/424	61/6873	0.8	0.735565	0.897833	615582/511716/504769
bta04514	Cell adhesion molecules	7/424	135/6873	0.84	0.735926	0.897833	539919/100140801/529759/281941/512975/522202/282637
bta04917	Prolactin signaling pathway	4/424	80/6873	0.81	0.736237	0.897833	281422/512943/280839/616576
bta04668	TNF signaling pathway	6/424	117/6873	0.83	0.736955	0.897833	286799/507234/280943/512943/286883/493720
bta04722	Neurotrophin signaling pathway	6/424	117/6873	0.83	0.736955	0.897833	512943/515034/282162/525416/530719/617095
bta00900	Terpenoid backbone biosynthesis	1/424	21/6873	0.77	0.737945	0.897833	407767
bta00514	Other types of O-glycan biosynthesis	2/424	42/6873	0.77	0.741583	0.897833	532242/505622
bta04962	Vasopressin-regulated water reabsorption	2/424	42/6873	0.77	0.741583	0.897833	281008/525482
bta05135	Yersinia infection	7/424	137/6873	0.83	0.749714	0.897833	280943/282041/541008/512943/286883/281249/280828
bta04012	ErbB signaling pathway	4/424	82/6873	0.79	0.75374	0.897833	783452/282162/525416/530719
bta03060	Protein export	1/424	22/6873	0.74	0.754161	0.897833	786732
bta04740	Olfactory transduction	9/424	174/6873	0.84	0.75517	0.897833	540307/533330/281970/526623/618399/282162/525416/530719/617095
bta05017	Spinocerebellar ataxia	7/424	138/6873	0.82	0.756413	0.897833	541236/528410/282123/282478/100139857/614283/518117
bta04062	Chemokine signaling pathway	9/424	175/6873	0.83	0.76109	0.897833	282041/541008/618399/280828/408019/539108/100140488/525482/510708
bta04140	Autophagy - animal	7/424	139/6873	0.82	0.762984	0.897833	528410/616503/541106/505901/529235/281108/615342
bta04975	Fat digestion and absorption	2/424	46/6873	0.7	0.785918	0.897833	504545/515768
bta04211	Longevity regulating pathway	4/424	86/6873	0.75	0.786048	0.897833	538226/511961/525482/510708
bta05310	Asthma	1/424	25/6873	0.65	0.797044	0.897833	280943
bta04142	Lysosome	6/424	126/6873	0.77	0.798348	0.897833	286772/520564/281108/509427/540693/616331
bta05167	Kaposi sarcoma-associated herpesvirus infection	9/424	182/6873	0.8	0.799717	0.897833	286852/512943/286883/282257/618399/493720/280828/408019/617095
bta04914	Progesterone-mediated oocyte maturation	4/424	88/6873	0.74	0.800892	0.897833	100848466/512943/525482/510708
bta04915	Estrogen signaling pathway	6/424	127/6873	0.77	0.804433	0.897833	100848466/614969/282646/617095/525482/510708
bta00565	Ether lipid metabolism	2/424	48/6873	0.68	0.805476	0.897833	504545/504650
bta04744	Phototransduction	1/424	26/6873	0.62	0.80961	0.897833	617095
bta04966	Collecting duct acid secretion	1/424	26/6873	0.62	0.80961	0.897833	514368
bta01522	Endocrine resistance	4/424	90/6873	0.72	0.814893	0.897833	512943/505691/525482/510708
bta04666	Fc gamma R-mediated phagocytosis	4/424	90/6873	0.72	0.814893	0.897833	504545/529346/539332/614576
bta05020	Prion disease	13/424	259/6873	0.81	0.818833	0.897833	280943/282478/100139857/286852/338079/281941/512943/518136/538771/338086/615310/100337204/509779
bta04742	Taste transduction	3/424	72/6873	0.68	0.830158	0.897833	281970/782166/282237
bta00591	Linoleic acid metabolism	1/424	29/6873	0.56	0.842839	0.897833	507988
bta00860	Porphyrin metabolism	1/424	29/6873	0.56	0.842839	0.897833	511743
bta04710	Circadian rhythm	1/424	29/6873	0.56	0.842839	0.897833	511961
bta05212	Pancreatic cancer	3/424	74/6873	0.66	0.843836	0.897833	538957/534069/505463
bta00564	Glycerophospholipid metabolism	4/424	96/6873	0.68	0.852118	0.897833	504545/524639/504948/504650
bta05215	Prostate cancer	4/424	96/6873	0.68	0.852118	0.897833	511037/282646/404193/533526
bta05206	MicroRNAs in cancer	7/424	157/6873	0.72	0.85999	0.897833	281544/534069/515748/507319/529235/533526/281588
bta00512	Mucin type O-glycan biosynthesis	1/424	31/6873	0.52	0.86171	0.897833	505622
bta03250	Viral life cycle - HIV-1	2/424	55/6873	0.59	0.861973	0.897833	280873/515593
bta04370	VEGF signaling pathway	2/424	56/6873	0.58	0.868694	0.897833	286852/512943
bta04136	Autophagy - other	1/424	32/6873	0.51	0.87028	0.897833	528410
bta04215	Apoptosis - multiple species	1/424	32/6873	0.51	0.87028	0.897833	493720
bta04621	NOD-like receptor signaling pathway	7/424	160/6873	0.71	0.872507	0.897833	507234/280943/512943/281249/282257/493720/280828
bta03410	Base excision repair	1/424	33/6873	0.49	0.87832	0.897833	785457
bta05330	Allograft rejection	1/424	33/6873	0.49	0.87832	0.897833	280943
bta04660	T cell receptor signaling pathway	4/424	102/6873	0.64	0.882807	0.897833	280943/505901/286852/512943
bta04540	Gap junction	3/424	81/6873	0.6	0.884454	0.897833	533330/525482/510708
bta00561	Glycerolipid metabolism	2/424	59/6873	0.55	0.887092	0.897833	504545/618607
bta03015	mRNA surveillance pathway	3/424	82/6873	0.59	0.889418	0.897833	787607/782110/505542
bta04726	Serotonergic synapse	4/424	104/6873	0.62	0.891732	0.897833	614969/618399/100337204/509779
bta03030	DNA replication	1/424	35/6873	0.46	0.892939	0.897833	785457
bta05332	Graft-versus-host disease	1/424	35/6873	0.46	0.892939	0.897833	280943
bta04151	PI3K-Akt signaling pathway	16/424	337/6873	0.77	0.893895	0.897833	286799/281422/787607/782110/528390/506953/282257/282646/786335/618399/404193/533929/507319/529235/407142/533526
bta04714	Thermogenesis	10/424	225/6873	0.72	0.896255	0.897833	777769/533330/511961/338079/512943/504502/506812/338086/525482/510708
bta05160	Hepatitis C	6/424	148/6873	0.66	0.901874	0.897833	280943/782110/280873/282257/493720/512975
bta00310	Lysine degradation	2/424	62/6873	0.52	0.90308	0.897833	515928/533087
bta05210	Colorectal cancer	3/424	85/6873	0.57	0.903185	0.897833	538957/534069/505463
bta00513	Various types of N-glycan biosynthesis	1/424	37/6873	0.44	0.905805	0.897833	527449
bta05320	Autoimmune thyroid disease	1/424	37/6873	0.44	0.905805	0.897833	281553
bta04940	Type I diabetes mellitus	1/424	38/6873	0.43	0.911648	0.897833	280943
bta05162	Measles	5/424	132/6873	0.61	0.917201	0.897833	282602/280873/282257/493720/533526
bta05222	Small cell lung cancer	3/424	89/6873	0.55	0.919134	0.897833	507234/505463/533526
bta05208	Chemical carcinogenesis - reactive oxygen species	9/424	218/6873	0.67	0.928746	0.897833	282478/378474/338079/512943/506093/511716/535293/338086/618607
bta05211	Renal cell carcinoma	2/424	68/6873	0.48	0.928918	0.897833	538957/534069
bta03420	Nucleotide excision repair	1/424	43/6873	0.38	0.935863	0.897833	785457
bta04672	Intestinal immune network for IgA production	1/424	43/6873	0.38	0.935863	0.897833	539108
bta04520	Adherens junction	2/424	70/6873	0.46	0.935979	0.897833	780777/282637
bta05014	Amyotrophic lateral sclerosis	15/424	339/6873	0.72	0.936958	0.897833	541236/528410/280943/530858/286852/534150/783452/536132/338079/512943/286883/518136/538771/614283/338086
bta04145	Phagosome	5/424	143/6873	0.57	0.946038	0.897833	536132/511206/281108/281036/514368
bta04979	Cholesterol metabolism	1/424	46/6873	0.35	0.947083	0.897833	286772
bta05030	Cocaine addiction	1/424	46/6873	0.35	0.947083	0.897833	614283
bta00510	N-Glycan biosynthesis	1/424	47/6873	0.34	0.950369	0.897833	527449
bta01521	EGFR tyrosine kinase inhibitor resistance	2/424	78/6873	0.42	0.958109	0.897833	783452/404193
bta04210	Apoptosis	4/424	127/6873	0.51	0.958681	0.897833	280943/505463/493720/281108
bta00600	Sphingolipid metabolism	1/424	51/6873	0.32	0.961601	0.897833	504545
bta03460	Fanconi anemia pathway	1/424	51/6873	0.32	0.961601	0.897833	517422
bta04623	Cytosolic DNA-sensing pathway	1/424	55/6873	0.29	0.970295	0.897833	281249
bta04014	Ras signaling pathway	8/424	225/6873	0.58	0.972035	0.897833	286799/616503/618399/529346/404193/533929/507319/617095
bta04330	Notch signaling pathway	1/424	57/6873	0.28	0.973875	0.897833	532242
bta05034	Alcoholism	5/424	162/6873	0.5	0.975329	0.897833	531564/535415/618489/618399/617095
bta04613	Neutrophil extracellular trap formation	5/424	163/6873	0.5	0.976357	0.897833	282478/511206/512943/535415/618489
bta05203	Viral carcinogenesis	6/424	189/6873	0.51	0.979292	0.897833	507234/512571/535415/513678/408019/533526
bta04070	Phosphatidylinositol signaling system	2/424	93/6873	0.35	0.981475	0.897833	513301/617095
bta05168	Herpes simplex virus 1 infection	9/424	260/6873	0.56	0.982948	0.897833	618217/507234/280943/282602/281803/514889/282257/493720/281036
bta05171	Coronavirus disease - COVID-19	7/424	220/6873	0.52	0.985289	0.897833	280943/511037/618440/280873/512943/282257/280828
bta05221	Acute myeloid leukemia	1/424	66/6873	0.25	0.985349	0.897833	511206
bta04662	B cell receptor signaling pathway	1/424	69/6873	0.23	0.98792	0.897833	286852
bta00562	Inositol phosphate metabolism	1/424	71/6873	0.23	0.989379	0.897833	513301
bta00190	Oxidative phosphorylation	3/424	132/6873	0.37	0.989981	0.897833	338079/338086/514368
bta03018	RNA degradation	1/424	74/6873	0.22	0.991244	0.897833	506544
bta05322	Systemic lupus erythematosus	2/424	107/6873	0.3	0.991518	0.897833	280943/618489
bta04144	Endocytosis	6/424	235/6873	0.41	0.997164	0.897833	538771/404193/317659/618488/615310/614576
bta05231	Choline metabolism in cancer	1/424	94/6873	0.17	0.997589	0.897833	504545
bta05016	Huntington disease	8/424	290/6873	0.45	0.997888	0.897833	528410/282478/338079/781037/518136/538771/614283/338086
bta03013	Nucleocytoplasmic transport	1/424	98/6873	0.17	0.998138	0.897833	515233
bta03010	Ribosome	1/424	127/6873	0.13	0.999715	0.897833	618440
bta04120	Ubiquitin mediated proteolysis	1/424	141/6873	0.11	0.999885	0.897833	530858
bta04610	Complement and coagulation cascades	0/424	75/6873	0	1	0.897833

## Sheet: mageta modules_enrich_KEGG
ID	Description	GeneRatio	BgRatio	enrich_factor	pvalue	qvalue	geneID
bta04260	Cardiac muscle contraction	7/80	83/6873	7.25	4.52673e-05	0.00814812	540307/327688/781184/785909/100337204/518117/537960
bta05412	Arrhythmogenic right ventricular cardiomyopathy	6/80	74/6873	6.97	0.000203081	0.0148801	540307/537784/781184/785909/100337204/518117
bta04921	Oxytocin signaling pathway	8/80	144/6873	4.77	0.000248002	0.0148801	100139857/511224/533378/515421/512254/781184/785909/100337204
bta04022	cGMP-PKG signaling pathway	8/80	161/6873	4.27	0.00052757	0.0237407	540307/281356/511224/533378/512254/100337204/518117/537960
bta04261	Adrenergic signaling in cardiomyocytes	7/80	143/6873	4.21	0.00130353	0.0469271	540307/538100/781184/785909/100337204/518117/537960
bta04024	cAMP signaling pathway	8/80	210/6873	3.27	0.00291462	0.0808183	524624/512222/533729/511224/280839/100337204/518117/537960
bta05410	Hypertrophic cardiomyopathy	5/80	86/6873	4.99	0.00314293	0.0808183	540307/781184/785909/100337204/518117
bta05414	Dilated cardiomyopathy	5/80	90/6873	4.77	0.00382574	0.084197	540307/781184/785909/100337204/518117
bta04371	Apelin signaling pathway	6/80	132/6873	3.91	0.00420985	0.084197	540307/100139857/536132/533378/512254/407125
bta00051	Fructose and mannose metabolism	3/80	32/6873	8.05	0.00590765	0.106338	534928/407183/788926
bta04928	Parathyroid hormone synthesis, secretion and action	5/80	104/6873	4.13	0.00705747	0.115486	524624/512222/540245/512254/407125
bta00430	Taurine and hypotaurine metabolism	2/80	14/6873	12.27	0.0111205	0.166807	615929/614548
bta04020	Calcium signaling pathway	7/80	225/6873	2.67	0.015385	0.213023	615428/540307/100139857/536132/533378/100337204/518117
bta04010	MAPK signaling pathway	8/80	285/6873	2.41	0.0172795	0.222165	533729/506660/528390/511224/512254/781184/785909/100337204
bta04270	Vascular smooth muscle contraction	5/80	134/6873	3.21	0.0195832	0.234999	505901/281356/533378/515421/100337204
bta04925	Aldosterone synthesis and secretion	4/80	93/6873	3.7	0.0227521	0.255961	540245/528390/100337204/537960
bta00052	Galactose metabolism	2/80	29/6873	5.93	0.0443541	0.469631	788926/530330
bta00500	Starch and sucrose metabolism	2/80	30/6873	5.73	0.047171	0.47171	788926/530330
bta05202	Transcriptional misregulation in cancer	5/80	176/6873	2.44	0.0536795	0.508543	528877/512254/615458/788250/539020
bta04061	Viral protein interaction with cytokine and cytokine receptor	3/80	82/6873	3.14	0.0699308	0.629046	509038/517354/509167
bta05235	PD-L1 expression and PD-1 checkpoint pathway in cancer	3/80	85/6873	3.03	0.0761207	0.629046	505901/511224/536642
bta04973	Carbohydrate digestion and absorption	2/80	40/6873	4.3	0.078565	0.629046	788926/537960
bta04912	GnRH signaling pathway	3/80	87/6873	2.96	0.0803781	0.629046	280839/407125/100337204
bta04930	Type II diabetes mellitus	2/80	43/6873	4	0.0889745	0.667308	618421/788926
bta00980	Metabolism of xenobiotics by cytochrome P450	2/80	48/6873	3.58	0.107157	0.731873	613498/617564
bta04625	C-type lectin receptor signaling pathway	3/80	99/6873	2.6	0.107984	0.731873	533729/511224/526233
bta04961	Endocrine and other factor-regulated calcium reabsorption	2/80	49/6873	3.51	0.110906	0.731873	540307/537960
bta04660	T cell receptor signaling pathway	3/80	102/6873	2.53	0.115399	0.731873	505901/533729/511224
bta04066	HIF-1 signaling pathway	3/80	103/6873	2.5	0.117913	0.731873	407183/788926/767880
bta04978	Mineral absorption	2/80	53/6873	3.24	0.126232	0.755652	540307/537960
bta00480	Glutathione metabolism	2/80	54/6873	3.18	0.13014	0.755652	613498/615929
bta04730	Long-term depression	2/80	56/6873	3.07	0.13804	0.774702	100139857/536132
bta00010	Glycolysis / Gluconeogenesis	2/80	57/6873	3.01	0.142029	0.774702	788926/767880
bta04360	Axon guidance	4/80	177/6873	1.94	0.150547	0.791111	524464/785942/534842/533729
bta04929	GnRH secretion	2/80	60/6873	2.86	0.154141	0.791111	280839/100337204
bta04927	Cortisol synthesis and secretion	2/80	61/6873	2.82	0.158222	0.791111	528390/100337204
bta00910	Nitrogen metabolism	1/80	16/6873	5.37	0.170999	0.80176	513850
bta00230	Purine metabolism	3/80	123/6873	2.1	0.172092	0.80176	524624/512222/512748
bta04115	p53 signaling pathway	2/80	69/6873	2.49	0.191532	0.80176	538226/511754
bta05223	Non-small cell lung cancer	2/80	70/6873	2.45	0.195764	0.80176	511754/536642
bta00532	Glycosaminoglycan biosynthesis - chondroitin sulfate / dermatan sulfate	1/80	19/6873	4.52	0.199682	0.80176	509328
bta04971	Gastric acid secretion	2/80	72/6873	2.39	0.204263	0.80176	533378/537960
bta00040	Pentose and glucuronate interconversions	1/80	20/6873	4.3	0.209023	0.80176	617564
bta00220	Arginine biosynthesis	1/80	20/6873	4.3	0.209023	0.80176	536132
bta00770	Pantothenate and CoA biosynthesis	1/80	20/6873	4.3	0.209023	0.80176	614548
bta03018	RNA degradation	2/80	74/6873	2.32	0.212803	0.80176	767880/539364
bta04810	Regulation of actin cytoskeleton	4/80	204/6873	1.68	0.213168	0.80176	533729/514106/533378/509748
bta05017	Spinocerebellar ataxia	3/80	138/6873	1.87	0.216581	0.80176	100139857/616399/518117
bta04964	Proximal tubule bicarbonate reclamation	1/80	21/6873	4.09	0.218257	0.80176	537960
bta00534	Glycosaminoglycan biosynthesis - heparan sulfate / heparin	1/80	22/6873	3.91	0.227384	0.812425	517768
bta04977	Vitamin digestion and absorption	1/80	23/6873	3.74	0.236406	0.812425	281588
bta04970	Salivary secretion	2/80	82/6873	2.1	0.247259	0.812425	536132/537960
bta04934	Cushing syndrome	3/80	148/6873	1.74	0.247487	0.812425	528390/511754/100337204
bta04911	Insulin secretion	2/80	83/6873	2.07	0.251587	0.812425	100337204/537960
bta04727	GABAergic synapse	2/80	84/6873	2.05	0.255918	0.812425	407118/100337204
bta04950	Maturity onset diabetes of the young	1/80	26/6873	3.3	0.262852	0.812425	618421
bta05032	Morphine addiction	2/80	86/6873	2	0.264584	0.812425	524624/512222
bta04713	Circadian entrainment	2/80	87/6873	1.98	0.268918	0.812425	100139857/536132
bta04658	Th1 and Th2 cell differentiation	2/80	88/6873	1.95	0.273253	0.812425	505901/511224
bta04392	Hippo signaling pathway - multiple species	1/80	28/6873	3.07	0.279978	0.812425	533729
bta04666	Fc gamma R-mediated phagocytosis	2/80	90/6873	1.91	0.281919	0.812425	533729/614576
bta04972	Pancreatic secretion	2/80	91/6873	1.89	0.28625	0.812425	518117/537960
bta01523	Antifolate resistance	1/80	29/6873	2.96	0.288394	0.812425	281588
bta00410	beta-Alanine metabolism	1/80	30/6873	2.86	0.296712	0.812425	614548
bta04933	AGE-RAGE signaling pathway in diabetic complications	2/80	96/6873	1.79	0.30786	0.812425	511224/407125
bta04064	NF-kappa B signaling pathway	2/80	98/6873	1.75	0.316474	0.812425	505901/509167
bta00760	Nicotinate and nicotinamide metabolism	1/80	33/6873	2.6	0.321094	0.812425	399559
bta04062	Chemokine signaling pathway	3/80	175/6873	1.47	0.333456	0.812425	533729/517354/509167
bta03030	DNA replication	1/80	35/6873	2.45	0.336883	0.812425	540969
bta04650	Natural killer cell mediated cytotoxicity	2/80	103/6873	1.67	0.337902	0.812425	533729/511224
bta04974	Protein digestion and absorption	2/80	103/6873	1.67	0.337902	0.812425	540307/537960
bta04659	Th17 cell differentiation	2/80	104/6873	1.65	0.342166	0.812425	505901/511224
bta01250	Biosynthesis of nucleotide sugars	1/80	36/6873	2.39	0.344641	0.812425	788926
bta04960	Aldosterone-regulated sodium reabsorption	1/80	36/6873	2.39	0.344641	0.812425	537960
bta04931	Insulin resistance	2/80	106/6873	1.62	0.350669	0.812425	505901/783217
bta05020	Prion disease	4/80	259/6873	1.33	0.356064	0.812425	100139857/407125/327688/100337204
bta01200	Carbon metabolism	2/80	108/6873	1.59	0.359135	0.812425	788926/767880
bta04725	Cholinergic synapse	2/80	108/6873	1.59	0.359135	0.812425	613605/100337204
bta02010	ABC transporters	1/80	38/6873	2.26	0.359889	0.812425	281588
bta04060	Cytokine-cytokine receptor interaction	4/80	261/6873	1.32	0.361412	0.812425	509038/517354/100848228/509167
bta04216	Ferroptosis	1/80	39/6873	2.2	0.367381	0.812425	508193
bta00260	Glycine, serine and threonine metabolism	1/80	40/6873	2.15	0.374787	0.812425	538212
bta04510	Focal adhesion	3/80	189/6873	1.36	0.378272	0.812425	533729/514106/533378
bta04152	AMPK signaling pathway	2/80	116/6873	1.48	0.392588	0.812425	534928/407183
bta04919	Thyroid hormone signaling pathway	2/80	118/6873	1.46	0.400835	0.812425	518117/537960
bta00982	Drug metabolism - cytochrome P450	1/80	44/6873	1.95	0.403563	0.812425	613498
bta05415	Diabetic cardiomyopathy	3/80	197/6873	1.31	0.40365	0.812425	507367/327688/518117
bta04380	Osteoclast differentiation	2/80	119/6873	1.44	0.40494	0.812425	511224/540819
bta05204	Chemical carcinogenesis - DNA adducts	1/80	45/6873	1.91	0.41055	0.812425	613498
bta05030	Cocaine addiction	1/80	46/6873	1.87	0.417456	0.812425	540819
bta05010	Alzheimer disease	5/80	366/6873	1.17	0.423442	0.812425	508193/536132/327688/100337204/518117
bta00520	Amino sugar and nucleotide sugar metabolism	1/80	47/6873	1.83	0.424282	0.812425	788926
bta04913	Ovarian steroidogenesis	1/80	47/6873	1.83	0.424282	0.812425	280839
bta05022	Pathways of neurodegeneration - multiple diseases	6/80	451/6873	1.14	0.429366	0.812425	100139857/536132/327688/100337204/616399/518117
bta00330	Arginine and proline metabolism	1/80	48/6873	1.79	0.43103	0.812425	536132
bta04068	FoxO signaling pathway	2/80	126/6873	1.36	0.433293	0.812425	112446032/539020
bta00830	Retinol metabolism	1/80	51/6873	1.68	0.450807	0.832929	535075
bta05163	Human cytomegalovirus infection	3/80	213/6873	1.21	0.453484	0.832929	511224/517354/511754
bta04340	Hedgehog signaling pathway	1/80	53/6873	1.62	0.463613	0.836028	100336796
bta04514	Cell adhesion molecules	2/80	135/6873	1.27	0.468686	0.836028	100140960/522202
bta05418	Fluid shear stress and atherosclerosis	2/80	136/6873	1.26	0.472539	0.836028	281356/512254
bta04330	Notch signaling pathway	1/80	57/6873	1.51	0.488346	0.836028	616399
bta05321	Inflammatory bowel disease	1/80	62/6873	1.39	0.517685	0.836028	511224
bta04218	Cellular senescence	2/80	149/6873	1.15	0.521095	0.836028	511224/511754
bta05132	Salmonella infection	3/80	236/6873	1.09	0.522001	0.836028	533729/514106/787862
bta04932	Non-alcoholic fatty liver disease	2/80	150/6873	1.15	0.524708	0.836028	783217/327688
bta05031	Amphetamine addiction	1/80	64/6873	1.34	0.528949	0.836028	540819
bta04920	Adipocytokine signaling pathway	1/80	66/6873	1.3	0.539954	0.836028	505901
bta04924	Renin secretion	1/80	66/6873	1.3	0.539954	0.836028	100337204
bta05230	Central carbon metabolism in cancer	1/80	66/6873	1.3	0.539954	0.836028	788926
bta04630	JAK-STAT signaling pathway	2/80	156/6873	1.1	0.546004	0.836028	509038/100848228
bta05161	Hepatitis B	2/80	156/6873	1.1	0.546004	0.836028	511224/526233
bta05206	MicroRNAs in cancer	2/80	157/6873	1.09	0.54949	0.836028	511754/281588
bta04976	Bile secretion	1/80	68/6873	1.26	0.550705	0.836028	537960
bta05211	Renal cell carcinoma	1/80	68/6873	1.26	0.550705	0.836028	533729
bta04310	Wnt signaling pathway	2/80	158/6873	1.09	0.552957	0.836028	536121/511224
bta04662	B cell receptor signaling pathway	1/80	69/6873	1.25	0.555987	0.836028	511224
bta05218	Melanoma	1/80	69/6873	1.25	0.555987	0.836028	511754
bta04151	PI3K-Akt signaling pathway	4/80	337/6873	1.02	0.556934	0.836028	506660/528390/509748/511754
bta01230	Biosynthesis of amino acids	1/80	70/6873	1.23	0.561207	0.836028	767880
bta04918	Thyroid hormone synthesis	1/80	71/6873	1.21	0.566367	0.836028	537960
bta05034	Alcoholism	2/80	162/6873	1.06	0.566641	0.836028	788250/540819
bta05214	Glioma	1/80	72/6873	1.19	0.571467	0.836294	511754
bta05212	Pancreatic cancer	1/80	74/6873	1.16	0.58149	0.844099	511754
bta05220	Chronic myeloid leukemia	1/80	75/6873	1.15	0.586415	0.844437	511754
bta04721	Synaptic vesicle cycle	1/80	77/6873	1.12	0.596092	0.851429	407118
bta01232	Nucleotide metabolism	1/80	79/6873	1.09	0.605546	0.851429	512748
bta04146	Peroxisome	1/80	79/6873	1.09	0.605546	0.851429	613498
bta04917	Prolactin signaling pathway	1/80	80/6873	1.07	0.610191	0.851429	280839
bta04012	ErbB signaling pathway	1/80	82/6873	1.05	0.619319	0.8556	533729
bta05167	Kaposi sarcoma-associated herpesvirus infection	2/80	182/6873	0.94	0.630572	0.8556	511224/511754
bta05207	Chemical carcinogenesis - receptor activation	2/80	182/6873	0.94	0.630572	0.8556	100337204/539020
bta04211	Longevity regulating pathway	1/80	86/6873	1	0.636947	0.8556	538226
bta04657	IL-17 signaling pathway	1/80	86/6873	1	0.636947	0.8556	540819
bta05222	Small cell lung cancer	1/80	89/6873	0.97	0.649636	0.861853	511754
bta05203	Viral carcinogenesis	2/80	189/6873	0.91	0.651178	0.861853	526233/511754
bta04750	Inflammatory mediator regulation of TRP channels	1/80	95/6873	0.9	0.673715	0.882182	505901
bta05170	Human immunodeficiency virus 1 infection	2/80	198/6873	0.87	0.67634	0.882182	533729/511224
bta04726	Serotonergic synapse	1/80	104/6873	0.83	0.706802	0.903333	100337204
bta05166	Human T-cell leukemia virus 1 infection	2/80	212/6873	0.81	0.712573	0.903333	511224/407125
bta05322	Systemic lupus erythematosus	1/80	107/6873	0.8	0.717076	0.903333	788250
bta04670	Leukocyte transendothelial migration	1/80	110/6873	0.78	0.726995	0.903333	514106
bta04935	Growth hormone synthesis, secretion and action	1/80	110/6873	0.78	0.726995	0.903333	100337204
bta04071	Sphingolipid signaling pathway	1/80	115/6873	0.75	0.742769	0.903333	281588
bta04014	Ras signaling pathway	2/80	225/6873	0.76	0.743167	0.903333	533729/506660
bta04611	Platelet activation	1/80	117/6873	0.73	0.748824	0.903333	533378
bta04668	TNF signaling pathway	1/80	117/6873	0.73	0.748824	0.903333	517354
bta04722	Neurotrophin signaling pathway	1/80	117/6873	0.73	0.748824	0.903333	506660
bta04080	Neuroactive ligand-receptor interaction	3/80	334/6873	0.77	0.753919	0.903333	509748/280839/281687
bta04110	Cell cycle	1/80	121/6873	0.71	0.760514	0.903333	511754
bta04926	Relaxin signaling pathway	1/80	123/6873	0.7	0.766155	0.903333	536132
bta04728	Dopaminergic synapse	1/80	125/6873	0.69	0.771666	0.903333	529590
bta00190	Oxidative phosphorylation	1/80	132/6873	0.65	0.789962	0.903333	327688
bta01240	Biosynthesis of cofactors	1/80	132/6873	0.65	0.789962	0.903333	399559
bta04910	Insulin signaling pathway	1/80	132/6873	0.65	0.789962	0.903333	788926
bta05162	Measles	1/80	132/6873	0.65	0.789962	0.903333	511754
bta05135	Yersinia infection	1/80	137/6873	0.63	0.802136	0.903333	511224
bta04140	Autophagy - animal	1/80	139/6873	0.62	0.806809	0.903333	505901
bta05012	Parkinson disease	2/80	258/6873	0.67	0.808705	0.903333	508193/327688
bta04723	Retrograde endocannabinoid signaling	1/80	142/6873	0.61	0.813614	0.903333	100337204
bta04072	Phospholipase D signaling pathway	1/80	143/6873	0.6	0.815829	0.903333	509748
bta04145	Phagosome	1/80	143/6873	0.6	0.815829	0.903333	536132
bta05224	Breast cancer	1/80	144/6873	0.6	0.818018	0.903333	511754
bta05160	Hepatitis C	1/80	148/6873	0.58	0.826521	0.907157	511754
bta05164	Influenza A	1/80	152/6873	0.57	0.834631	0.910507	511754
bta04530	Tight junction	1/80	156/6873	0.55	0.842367	0.91341	515421
bta04613	Neutrophil extracellular trap formation	1/80	163/6873	0.53	0.855054	0.919811	788250
bta05225	Hepatocellular carcinoma	1/80	165/6873	0.52	0.85849	0.919811	511754
bta04740	Olfactory transduction	1/80	174/6873	0.49	0.872983	0.929804	540307
bta05169	Epstein-Barr virus infection	1/80	196/6873	0.44	0.902525	0.942645	511754
bta05205	Proteoglycans in cancer	1/80	196/6873	0.44	0.902525	0.942645	533729
bta05417	Lipid and atherosclerosis	1/80	196/6873	0.44	0.902525	0.942645	511224
bta04015	Rap1 signaling pathway	1/80	200/6873	0.43	0.907114	0.942645	509748
bta05014	Amyotrophic lateral sclerosis	2/80	339/6873	0.51	0.911223	0.942645	536132/327688
bta05208	Chemical carcinogenesis - reactive oxygen species	1/80	218/6873	0.39	0.925261	0.949718	327688
bta04714	Thermogenesis	1/80	225/6873	0.38	0.931331	0.949718	327688
bta05200	Pathways in cancer	3/80	500/6873	0.52	0.937562	0.949718	509748/511754/536642
bta04144	Endocytosis	1/80	235/6873	0.37	0.939166	0.949718	614576
bta05016	Huntington disease	1/80	290/6873	0.3	0.968859	0.952381	327688
bta05165	Human papillomavirus infection	1/80	311/6873	0.28	0.97592	0.952381	511754
bta00053	Ascorbate and aldarate metabolism	0/80	16/6873	0	1	0.952381
bta00071	Fatty acid degradation	0/80	40/6873	0	1	0.952381
bta00280	Valine, leucine and isoleucine degradation	0/80	47/6873	0	1	0.952381
bta00310	Lysine degradation	0/80	62/6873	0	1	0.952381
bta00340	Histidine metabolism	0/80	20/6873	0	1	0.952381
bta00380	Tryptophan metabolism	0/80	44/6873	0	1	0.952381
bta00561	Glycerolipid metabolism	0/80	59/6873	0	1	0.952381
bta00620	Pyruvate metabolism	0/80	41/6873	0	1	0.952381
bta04936	Alcoholic liver disease	0/80	130/6873	0	1	0.952381
