# Supplementary material for: Identification of key genes in bovine muscle development by co-expression analysis
Source: PeerJ. 2023 Apr 12;11:e15093. doi: 10.7717/peerj.15093 (PMC10105563; doi:10.7717/peerj.15093)
Supplement: Supplemental Information 9 [file peerj-11-15093-s009.csv]

## Sheet: 1.2
Top 20 in network string_interactions_short.tsv ranked by MCC method
Rank	Name	Score
1	TNNC2	3434
2	MYL1	3163
3	NEB	3074
4	MYLPF	2976
5	MYOZ1	1927
6	MYBPH	1829
7	PDLIM3	1442
8	ATP2A1	1040
9	TMEM38A	746
10	MYBPC1	556
11	MYH8	496
12	TMOD4	390
13	MYBPC2	369
14	MYH4	279
15	MYH2	255
16	LMOD3	234
17	NFATC1	145
18	AMPD1	132
19	NR4A1	118
20	NR4A3	104
