# Supplementary material for: Identification of key genes in bovine muscle development by co-expression analysis
Source: PeerJ. 2023 Apr 12;11:e15093. doi: 10.7717/peerj.15093 (PMC10105563; doi:10.7717/peerj.15093)
Supplement: Supplemental Information 10 [file peerj-11-15093-s010.xlsx]

## Sheet: ATP2A1
ID	Description	setSize	enrichmentScore	NES	pvalue	p.adjust	qvalues	rank	leading_edge	core_enrichment
bta00510	N-Glycan biosynthesis	50	-0.608548	-2.73835	1e-10	4.125e-09	2.80263e-09	3963	tags=68%, list=21%, signal=54%	526256/506537/615012/510138/615007/282073/515771/504908/539837/281781/614624/614538/530027/537812/509745/521539/534248/540845/537595/510682/540155/534231/538899/507939/504346/535834/101906103/532645/100125314/506566/523737/516155/538731/507815
bta04141	Protein processing in endoplasmic reticulum	165	-0.419834	-2.43226	1e-10	4.125e-09	2.80263e-09	3377	tags=48%, list=18%, signal=40%	512323/507689/511649/497024/512589/100298456/777788/511682/509488/767874/514361/512355/513253/513928/528862/790870/531964/615027/613403/614471/790880/512530/512276/514090/614538/530027/509646/614959/511008/112442685/515784/507124/513829/508358/520650/513023/508465/281373/541236/781036/407129/538938/613357/535820/505089/516332/510682/506316/540155/534231/415110/504832/507939/517171/535071/539931/5…
bta04142	Lysosome	134	-0.509048	-2.85598	1e-10	4.125e-09	2.80263e-09	4155	tags=63%, list=22%, signal=50%	505097/506192/100299651/281838/281023/517031/404155/515575/281105/531411/504799/534524/616331/521189/282218/509522/282148/616804/530164/281421/282657/616562/512078/782535/536359/508713/513684/286768/404156/505684/535407/538401/281433/509715/767602/505554/768040/529148/338038/515935/281080/789125/507677/100125267/509610/510620/281897/281291/512444/327687/515729/541272/511050/541071/514761/281909/5…
bta04260	Cardiac muscle contraction	90	0.58695	3.20966	1e-10	4.125e-09	2.80263e-09	828	tags=21%, list=4%, signal=20%	518117/100337204/327703/781184/537960/521616/785909/497015/515161/497019/282608/534061/540307/539969/510026/281544/282714/540568/519331
bta04261	Adrenergic signaling in cardiomyocytes	143	0.49296	2.96242	1e-10	4.125e-09	2.80263e-09	918	tags=22%, list=5%, signal=21%	518117/538100/100337204/327703/781184/530719/767949/537960/521616/509107/618204/785909/520277/497015/515161/497019/100298789/282608/525416/540307/539969/512943/510026/281544/787607/532713/282714/540568/519331/282322/525482
bta04921	Oxytocin signaling pathway	143	0.459961	2.76412	1e-10	4.125e-09	2.80263e-09	980	tags=24%, list=5%, signal=23%	533378/100337204/327703/781184/530719/100139857/521616/785909/520277/282608/511961/538479/515421/525416/512254/790867/282321/539969/521196/512665/286852/532713/786886/521730/518025/510434/519331/282322/100298939/533527/525482/511224/538954/281371
bta05168	Herpes simplex virus 1 infection	296	-0.430183	-2.70684	1e-10	4.125e-09	2.80263e-09	7635	tags=70%, list=40%, signal=43%	281020/783760/407111/281534/100125304/282152/514386/281043/534063/281873/504336/504985/327712/281237/510417/533492/768054/100140999/786262/282307/282291/505521/538845/282497/100125579/519958/444866/100125413/506214/512908/282530/524959/100848207/282490/512672/512684/112441496/508619/613384/539241/515674/539022/507268/282308/282491/101905074/521998/101902926/282488/100140756/614310/510078/784893/5…
bta05410	Hypertrophic cardiomyopathy	87	0.549024	2.9554	1e-10	4.125e-09	2.80263e-09	1009	tags=28%, list=5%, signal=26%	518117/100337204/327703/781184/521616/785909/497015/497019/282608/511961/540307/541308/280765/539969/512665/281544/506155/517059/282714/540568/519331/535372/538954/282644
bta04922	Glucagon signaling pathway	97	0.514117	2.81754	2.13171e-10	7.81626e-09	5.31057e-09	982	tags=25%, list=5%, signal=24%	327664/530719/512571/100336808/786335/511783/509107/540682/515067/520277/281274/511961/506544/514066/525416/790867/282321/512665/286852/532713/282322/533527/538954/282304
bta04740	Olfactory transduction	281	0.351029	2.32135	4.19343e-10	1.38383e-08	9.40212e-09	4647	tags=73%, list=24%, signal=56%	530719/520277/526623/785036/525416/785068/540307/519183/528106/786149/526621/512948/784976/783917/783210/783884/532075/509884/532713/782678/512441/282322/527077/282162/617095/529284/784594/507721/788891/107131705/100301071/615739/618593/282004/508468/112441493/618717/281970/526047/526211/514553/783203/504688/786765/505481/618070/528422/516263/515369/514342/787779/788304/523389/783598/788633/61670…
bta05414	Dilated cardiomyopathy	91	0.509755	2.7673	1.17886e-09	3.53659e-08	2.40285e-08	1009	tags=25%, list=5%, signal=24%	518117/100337204/327703/781184/521616/785909/497015/497019/282608/540307/541308/280765/539969/281544/506155/517059/282714/540568/519331/535372/282322/525482/282644
bta03040	Spliceosome	140	-0.422057	-2.38599	1.57178e-09	4.32239e-08	2.93674e-08	5368	tags=57%, list=28%, signal=41%	534894/509802/100140430/112441916/534600/281827/509425/614310/112443614/613304/536093/510529/528991/515290/507828/540190/510177/526536/508312/100299693/509920/100124428/613634/767817/614922/531931/512584/507371/540258/539950/522372/520046/507895/100301114/533700/525110/767873/528135/510474/326578/507240/507066/508735/615198/509591/508788/514003/523250/507738/534586/506123/100299503/787681/615156/…
bta05171	Coronavirus disease - COVID-19	242	-0.339582	-2.08388	1.53474e-08	3.89589e-07	2.64697e-07	8747	tags=66%, list=46%, signal=36%	534961/535668/534492/281857/280943/507339/281112/504531/509968/615107/282325/529660/538639/280958/532262/617435/525408/112441463/615300/281309/788861/514214/281534/101902490/327672/280873/281043/767908/337888/614872/507270/286868/514569/768327/100337091/506297/540702/404142/282307/282291/326602/539369/282052/504413/531391/493686/282002/515534/618702/510547/507168/537631/540965/615178/510615/51303…
bta04020	Calcium signaling pathway	231	0.357538	2.30875	1.72612e-08	4.06872e-07	2.76439e-07	1304	tags=18%, list=7%, signal=17%	518117/615428/533378/100337204/508394/530719/100139857/100336808/540771/511783/536132/540682/520277/540317/525416/534061/540307/790867/326284/282321/618262/286852/282716/532713/518025/540568/517688/282322/338035/533527/525482/281371/528416/617610/613800/513057/281601/282162/540485/282119/534816
bta05160	Hepatitis C	151	-0.389501	-2.21833	2.3052e-08	5.07145e-07	3.44567e-07	4728	tags=49%, list=25%, signal=37%	512975/512405/535298/511077/519922/517948/537782/347699/281542/533199/510427/616115/280991/282306/509231/100336105/535369/507689/281276/511435/539124/509855/533216/281854/408016/524530/512355/512484/407217/100137872/282320/100138150/790875/281855/100140945/508541/615013/100048947/654488/514090/286865/282527/541140/524361/539003/282257/282258/513829/100125591/507481/506322/506182/533141/519217/504…
bta00010	Glycolysis / Gluconeogenesis	58	0.553765	2.70008	4.19774e-08	8.65784e-07	5.88236e-07	749	tags=26%, list=4%, signal=25%	534402/509566/512571/281181/281543/540303/515067/281274/506544/514066/280808/507476/788926/112447087/533785
bta04144	Endocytosis	236	-0.336081	-2.05282	6.96124e-08	1.3513e-06	9.18108e-07	6437	tags=56%, list=34%, signal=37%	112447442/520311/518839/507672/534708/540304/512672/508582/511223/507199/512010/533406/281861/783379/532237/506374/521413/516259/512489/497017/528478/100125224/504750/523736/404193/281769/532685/281827/524653/516048/617385/100141038/535376/515444/511582/514465/525906/615866/528153/789414/540190/514554/523124/535566/535742/533050/538660/539295/539779/531459/540709/508040/614321/527418/282382/51601…
bta05412	Arrhythmogenic right ventricular cardiomyopathy	74	0.509204	2.64162	8.30911e-08	1.52334e-06	1.03499e-06	1009	tags=26%, list=5%, signal=24%	518117/100337204/327703/781184/539375/521616/785909/282608/540307/541308/280765/539969/506155/536607/517059/540568/519331/535372/282644
bta00531	Glycosaminoglycan degradation	20	-0.695234	-2.38533	2.39135e-07	3.96754e-06	2.69565e-06	3187	tags=75%, list=17%, signal=63%	616562/538401/789125/512444/541272/511050/515397/535442/515809/515687/511607/786974/504468/507188/618571
bta03010	Ribosome	145	-0.382608	-2.16338	2.40457e-07	3.96754e-06	2.69565e-06	7300	tags=60%, list=38%, signal=37%	767908/337888/614872/507270/286868/514569/768327/506297/404142/326602/282052/504413/515534/618702/510547/507168/540965/506358/615178/510615/513031/286790/101902561/505603/337890/504858/539196/101907518/326582/515014/616065/511051/508216/505507/100299845/404140/533310/514966/282050/286873/515238/506229/535056/507151/286839/326584/540129/513128/286853/783948/509426/530464/286867/286884/514046/53389…
bta04110	Cell cycle	123	-0.400588	-2.21052	2.69172e-07	4.22985e-06	2.87387e-06	6630	tags=61%, list=35%, signal=40%	510120/505463/534579/535072/515301/618405/524925/511281/539924/508043/112446776/282089/515499/519018/530333/281729/522613/540248/507731/540537/511077/327679/515476/540547/282370/281542/506970/616487/616369/515376/516010/533294/516094/526824/506740/281668/281061/524870/513523/520428/281667/523714/535369/515462/538238/519409/281302/504367/540660/510916/524530/777693/517812/790875/537027/520188/5178…
bta00513	Various types of N-glycan biosynthesis	41	-0.539376	-2.30689	7.55752e-07	1.13363e-05	7.70216e-06	4364	tags=63%, list=23%, signal=49%	504474/526256/506184/506537/615012/615007/515771/281781/614624/614538/530027/521539/534248/786974/540845/504468/510682/534231/538899/507939/504346/101906103/532645/100125314/618571/507815
bta05164	Influenza A	167	-0.35014	-2.02979	1.23841e-06	1.77685e-05	1.20724e-05	8744	tags=68%, list=46%, signal=37%	281250/505453/281857/280943/504531/615107/281839/282325/280875/529660/538639/281942/512136/327694/525408/282535/538700/282494/514214/407111/327672/280873/281043/327712/281237/282307/282291/282497/531391/493686/520351/506214/507054/282530/282490/534708/507215/508619/539241/282308/282491/281536/112446776/539974/282488/281156/510814/537201/104968444/519922/517948/540547/537782/525246/347699/783596/5…
bta03008	Ribosome biogenesis in eukaryotes	76	-0.423901	-2.11096	6.33284e-06	8.70765e-05	5.9162e-05	7143	tags=63%, list=37%, signal=40%	112442867/510315/530688/512048/513405/618429/520351/514267/507155/112448582/507410/768075/617906/404165/282420/505846/360191/507369/521240/540772/538548/507132/540168/511723/538915/512692/540457/782674/531274/517417/614984/515001/510568/535163/525619/532864/508270/514945/513043/514336/614870/514870/511306/505324/505600/617204/516289/515057
bta00500	Starch and sucrose metabolism	31	0.599111	2.54634	8.41044e-06	0.000107247	7.28662e-05	1245	tags=42%, list=7%, signal=39%	327664/534402/517397/786335/280808/280812/788926/515366/539383/530330/505258/281565/505049
bta04022	cGMP-PKG signaling pathway	161	0.341786	2.09286	8.44974e-06	0.000107247	7.28662e-05	960	tags=16%, list=5%, signal=15%	518117/533378/100337204/537960/509107/520277/515161/281356/540307/512254/790867/533039/282321/100336730/510026/521196/286852/282716/518025/282714/540568/510434/533527/525482/511224
bta04210	Apoptosis	140	-0.351697	-1.98823	9.82124e-06	0.000120037	8.15565e-05	7635	tags=67%, list=40%, signal=41%	281020/407111/327672/282152/514386/541268/369025/504336/100141266/112443216/510967/515200/327711/281350/512730/282307/282291/531391/505463/286764/618405/507215/504244/537631/282333/282308/317697/282488/404053/510524/516326/414925/104968444/517948/782966/537782/281542/533199/616115/281105/281647/280991/526824/282306/616804/777788/493999/507426/540643/281879/281854/408016/512355/509715/540944/53988…
bta05212	Pancreatic cancer	75	-0.423823	-2.10675	1.06905e-05	0.000125995	8.5604e-05	7531	tags=72%, list=39%, signal=44%	507069/327672/282152/536051/282307/531391/505463/541218/538477/618405/537631/282308/513723/282089/540248/510814/537201/535376/517948/281440/514554/100139219/404181/281542/533199/616115/616369/282382/516010/280991/282306/523324/535369/519357/281854/524530/407217/100137872/619066/281855/100140945/508541/615013/532712/514090/286865/541140/522159/505238/511754/508233/514749/280730/510618
bta04910	Insulin signaling pathway	133	0.361914	2.13599	1.37755e-05	0.000153214	0.000104097	1186	tags=20%, list=6%, signal=19%	327664/784877/100336808/786335/511783/540682/520277/511961/514066/521196/512665/788926/520454/282359/513859/786886/100139988/539466/510434/538519/282322/100298939/538954/782160/533171/540421/518180
bta04621	NOD-like receptor signaling pathway	171	-0.33576	-1.95362	1.39285e-05	0.000153214	0.000104097	8771	tags=64%, list=46%, signal=35%	508105/534492/280943/613667/508029/281112/529660/538639/525408/616010/539780/781710/281214/505101/504400/282167/508888/514214/281020/513924/327672/282152/514386/281043/513939/512480/327712/768054/512486/282291/531391/519958/338472/281985/507664/507432/537631/510080/539513/506759/529195/528166/281536/539974/317697/519754/281832/281111/507427/287026/510814/286814/507055/537201/338039/519513/540892/…
bta05162	Measles	138	-0.348856	-1.96813	1.58918e-05	0.000169171	0.000114939	5668	tags=73%, list=30%, signal=52%	506873/538436/281050/100296565/618508/515105/512613/781996/281862/281831/281489/539235/534125/508105/281250/281857/538276/504531/282375/529660/327694/525408/513266/104968644/281020/407111/281534/280873/282152/282307/282291/493686/282229/537631/281861/282308/327682/281536/282420/282488/281827/510814/537201/540426/525906/519922/517948/540547/540190/537782/347699/529146/281542/616115/280991/282306/5…
bta03460	Fanconi anemia pathway	51	-0.459663	-2.08181	2.97861e-05	0.000307169	0.000208699	7865	tags=76%, list=41%, signal=45%	527411/613732/504844/507069/616549/615637/534148/541218/513606/353120/522442/615553/614063/618375/527039/523362/783256/512193/507620/537418/618018/526097/515845/618860/513626/516371/516328/540886/515909/100125299/510793/510858/100125287/281762/539681/614512/504869/515662/514749
bta05100	Bacterial invasion of epithelial cells	75	-0.408287	-2.02952	3.98435e-05	0.000398435	0.000270707	5668	tags=59%, list=30%, signal=41%	282308/540207/506270/538559/540614/517948/281440/540085/535742/527550/533188/282637/527418/281876/525427/282306/281577/506939/326600/100140583/531488/509821/540838/281080/281597/537203/532712/504482/511612/280979/286865/539003/404122/507196/539459/614345/538486/506605/512841/506596/281078/338049/508402/526848
bta04010	MAPK signaling pathway	287	0.268094	1.7772	5.86731e-05	0.000565348	0.000384112	960	tags=13%, list=5%, signal=12%	100337204/327703/781184/521616/509107/528415/785909/540317/282608/512254/790867/286883/326284/533039/282321/528390/519251/539969/512943/506660/521196/615432/286852/507245/541175/786886/281995/788091/510434/538519/519331/615727/282322/100298939/533527/281994/511224
bta04720	Long-term potentiation	62	0.448917	2.21938	5.99611e-05	0.000565348	0.000384112	1372	tags=31%, list=7%, signal=29%	530719/767949/509107/520277/525416/790867/282321/521196/286852/532713/510434/282322/100298939/533527/540421/281601/282162/540485/617095
bta04130	SNARE interactions in vesicular transport	32	-0.522199	-2.0858	6.35292e-05	0.000582351	0.000395664	5756	tags=66%, list=30%, signal=46%	507031/519624/507409/519148/780809/539960/788566/616923/513275/532261/614775/506198/780850/511030/507309/509758/616526/510909/614520/510312/613984
bta04062	Chemokine signaling pathway	183	-0.309113	-1.81225	6.53378e-05	0.000582743	0.00039593	8760	tags=66%, list=46%, signal=36%	281735/327671/533455/613667/538276/504531/614838/530001/615107/497018/788151/281797/281863/282325/505740/281796/534996/407771/525408/287018/408019/618470/281214/516133/282136/508888/281603/327672/541008/282682/281043/536051/282323/408018/327712/529196/100337091/519716/282307/282291/281203/531391/407772/515621/516104/281985/281345/506807/535530/282308/521413/512489/537682/497017/511112/536517/5356…
bta01200	Carbon metabolism	107	0.37175	2.10758	7.3538e-05	0.000638619	0.000433894	690	tags=13%, list=4%, signal=13%	509566/512571/281181/281543/540303/515067/506544/514066/280808/507476/788926/286886/511090/538173
bta00511	Other glycan degradation	23	-0.584232	-2.09607	8.03243e-05	0.000679667	0.000461783	4067	tags=57%, list=21%, signal=45%	541086/506184/509522/505554/515729/281909/786974/282272/504468/511345/507188/537087/618571
bta05203	Viral carcinogenesis	191	-0.30271	-1.79219	0.00011375	0.000938436	0.000637597	4669	tags=45%, list=24%, signal=34%	785291/513231/785086/535298/509827/517948/540547/281440/535742/404125/100137723/533050/281542/510654/616115/533491/616369/515376/510921/533294/282306/281713/281061/524870/281667/282148/524770/506402/509855/408016/524530/509006/512355/533202/528135/540944/326578/281715/281855/522155/511896/513928/513510/508541/615013/532712/517837/615414/514090/286865/785612/541140/514420/404126/100125591/507481/2…
bta03410	Base excision repair	33	-0.51247	-2.0597	0.000119367	0.000960759	0.000652765	5265	tags=73%, list=28%, signal=53%	515499/513458/444987/616242/617899/515343/518653/281630/513051/282691/507426/517825/281990/785457/615359/618306/520497/537616/505828/613730/100124507/616905/535203/511790
bta00600	Sphingolipid metabolism	54	-0.428602	-1.98871	0.000140943	0.00110741	0.000752402	5709	tags=57%, list=30%, signal=40%	100336736/533428/524460/617172/533103/505097/522515/617707/530776/504545/281433/505554/507207/516881/510620/539223/282407/540732/537972/509018/532742/786974/614165/507290/505514/504468/505558/507188/537087/618571/100336737
bta00970	Aminoacyl-tRNA biosynthesis	44	-0.456999	-2.00733	0.000163087	0.0012516	0.000850367	6155	tags=64%, list=32%, signal=43%	504609/286855/518874/506305/504824/525894/525350/532903/509429/538772/281476/538357/509624/510075/282060/512531/281576/511740/615182/100847824/514586/100300732/281581/510937/514726/616033/536956/508907
bta04520	Adherens junction	70	-0.401262	-1.96498	0.000173673	0.00130255	0.000884987	10293	tags=84%, list=54%, signal=39%	280977/540674/505709/505696/539359/281848/536092/515125/782690/539235/107131173/407102/327671/505453/515303/520631/504492/327672/408017/508150/533492/514637/531391/512312/112446776/282420/508658/527263/534360/540248/535376/536759/281440/535742/529146/282637/540481/282382/515187/281577/524770/512072/507837/531488/407217/504856/619066/507632/532712/504482/507204/104968536/505580/280979/539003/40412…
bta05169	Epstein-Barr virus infection	210	-0.285085	-1.71566	0.000197565	0.00144881	0.000984359	10093	tags=67%, list=53%, signal=32%	100300510/513497/282498/541184/282495/515532/538436/100296565/618508/512613/515515/781996/521939/525727/282493/282223/534125/507390/508105/534492/280943/506087/616942/533459/538276/280955/281874/504531/615107/407126/281839/529660/514813/534996/525408/282535/538700/617024/282494/407173/534057/281020/281534/281057/510417/100337091/282307/282291/282497/505463/541218/519958/506214/282530/524959/28249…
bta05161	Hepatitis B	159	-0.306141	-1.76147	0.000267301	0.00191759	0.00130286	5416	tags=47%, list=28%, signal=34%	281536/112446776/282089/515499/282488/540248/510814/537201/414925/535376/785086/535298/511077/509827/517948/535742/537782/525246/529146/281542/533199/510427/616115/282382/280991/282306/281713/281667/535369/618906/539124/533216/516039/519357/281854/408016/512484/100137872/281715/281855/100140945/788119/513928/508541/535490/615013/327687/286865/541140/282257/353105/100125591/539350/507481/529566/50…
bta03060	Protein export	23	-0.557884	-2.00154	0.000317227	0.00222734	0.00151331	4041	tags=57%, list=21%, signal=45%	281504/514960/767917/614017/504842/538938/509430/541040/786732/506986/415113/282078/505064
bta03030	DNA replication	35	-0.485089	-1.99404	0.000378391	0.00260144	0.00176748	7826	tags=77%, list=41%, signal=46%	613354/504844/515602/510120/539924/512830/515499/508389/616242/617899/504637/506970/518653/514842/281302/504367/534848/281990/514682/517812/785457/540969/514793/537616/613730/100124507/506240
bta01524	Platinum drug resistance	74	-0.374561	-1.86202	0.000519277	0.00343654	0.00233488	10672	tags=81%, list=56%, signal=36%	540378/782359/520925/100138102/505709/518075/513497/785216/281805/521685/781996/777644/616744/533652/504531/533115/516190/100296226/281020/506093/407111/327672/615552/282152/514386/615637/282307/531391/517724/513606/353120/282308/540526/541275/282488/414925/787696/517948/537782/281542/616369/281647/518976/280991/526824/282306/408016/537958/100137872/493719/100140945/615013/282097/514090/286865/50…
bta05145	Toxoplasmosis	111	-0.333375	-1.80047	0.0005297	0.00343654	0.00233488	10157	tags=79%, list=53%, signal=37%	511043/282498/282495/529670/100336873/518914/508720/781996/281831/525727/282493/534125/404074/518795/534492/281857/280943/614838/530001/112445051/520030/525408/282535/513478/538700/282494/506387/281020/281534/327672/282152/514386/282876/281237/282291/535043/282497/282387/531391/529939/519958/515621/506214/414346/282530/282490/508619/537631/539241/497017/282491/281536/282089/286849/530599/281827/5…
bta04911	Insulin secretion	82	0.365651	1.94206	0.000535469	0.00343654	0.00233488	1317	tags=20%, list=7%, signal=18%	100337204/530719/537960/509107/515161/532060/525416/510026/534180/532713/282322/525482/408008/281601/282162/282029
bta01230	Biosynthesis of amino acids	70	0.392687	2.01538	0.000541516	0.00343654	0.00233488	646	tags=13%, list=3%, signal=12%	509566/512571/281181/281543/540303/515067/506544/507476/286886
bta04622	RIG-I-like receptor signaling pathway	74	-0.37237	-1.85113	0.000587155	0.00365587	0.00248389	4176	tags=41%, list=22%, signal=32%	529146/536421/616115/767903/519541/618906/510923/506848/539124/533216/281854/512355/281855/535490/539145/532686/100125591/507481/508378/506182/533141/504760/504727/504707/508233/523962/281871/516979/767932/493720
bta03420	Nucleotide excision repair	44	-0.432975	-1.90181	0.000638741	0.00390342	0.00265208	5265	tags=64%, list=28%, signal=46%	515499/508389/522908/507984/617899/100137723/504637/518653/514842/515462/509602/519357/537958/281990/516371/511896/513510/785457/615512/539668/524274/537616/511951/511829/613730/100124507/508601/100125238
bta04925	Aldosterone synthesis and secretion	92	0.352823	1.91432	0.000711071	0.00426643	0.00289872	1229	tags=18%, list=6%, signal=17%	100337204/530719/537960/509107/520277/515161/525416/528390/510026/532713/540245/517688/282322/525482/613800/281601/282162
bta00051	Fructose and mannose metabolism	33	0.473199	2.03404	0.000805351	0.0046811	0.00318046	517	tags=21%, list=3%, signal=21%	509566/281543/534928/506544/514066/407183/788926
bta05222	Small cell lung cancer	91	-0.342991	-1.78365	0.000808554	0.0046811	0.00318046	10446	tags=81%, list=55%, signal=37%	508490/504943/281073/534712/692183/512915/511043/513497/541184/317711/529670/100336873/515011/538436/518914/512613/781996/781568/527124/280794/504531/520030/617024/506387/281020/282152/514386/511602/282876/282307/282291/535043/529939/505463/541218/618405/281875/282308/506270/519018/530599/511077/517948/537782/281542/616115/281876/281647/280991/282306/535369/539124/767985/616895/523526/519357/2818…
bta04115	p53 signaling pathway	76	-0.36394	-1.81236	0.000825399	0.00469624	0.00319074	5418	tags=50%, list=28%, signal=36%	515914/614920/282488/508167/104968444/327679/519896/538512/540547/537782/281542/617931/616369/526824/281668/281061/509863/282261/519357/408016/524530/616861/100140945/615414/507481/100137737/518897/532527/519217/507901/784541/504869/508875/511754/540786/280730/510618/510373
bta03015	mRNA surveillance pathway	87	-0.354018	-1.82005	0.000864532	0.00483552	0.00328538	6489	tags=59%, list=34%, signal=39%	520351/510604/280796/540982/327689/504925/537131/525143/616181/535321/100296970/516411/534600/787259/783569/282703/783336/529071/516175/504506/100124428/532933/541270/528728/282298/533147/511408/282320/100138150/768231/533788/100134966/508491/101908085/281712/506507/505417/524361/518859/784123/513043/282588/505757/515145/338051/511555/282296/538724/510872/541013/507051
bta04080	Neuroactive ligand-receptor interaction	322	0.233707	1.58278	0.00103448	0.00568966	0.0038657	1115	tags=8%, list=6%, signal=8%	281716/539128/338070/790333/613317/282179/281963/112441549/507053/280728/281688/540519/112444892/281191/618262/281687/524064/528699/281553/532277/281689/338035/530065/281371/528416/509493/282237
bta04071	Sphingolipid signaling pathway	117	-0.320033	-1.75571	0.00118918	0.00629866	0.00427947	6875	tags=60%, list=36%, signal=39%	282307/533538/531391/540305/282002/616901/281985/538896/537631/100336736/282308/287024/535321/527263/287026/533103/505097/517948/281440/522515/514554/507041/281542/533199/616115/530776/280991/282306/281791/618906/539123/536654/533147/281790/512355/505611/100137872/282320/100138150/619066/533788/516881/100134966/515159/506783/510620/539223/540732/517533/286865/282527/537972/541140/524361/509018/28…
bta04971	Gastric acid secretion	71	0.380596	1.97278	0.00119205	0.00629866	0.00427947	918	tags=17%, list=5%, signal=16%	533378/530719/537960/520277/515161/525416/510026/532713/518025/280800/282322/525482
bta05135	Yersinia infection	141	-0.302926	-1.7119	0.00120247	0.00629866	0.00427947	7513	tags=59%, list=39%, signal=36%	327672/541008/281043/530401/508819/281873/512480/535225/616969/535347/282307/282291/531391/519958/508361/540304/537631/524352/282308/100125224/529195/281536/506270/538559/519754/526227/516048/517948/281440/513377/533908/535742/529146/527550/533199/510427/616115/282846/281876/280991/282306/281577/616545/618906/536654/326600/507837/539124/516039/281854/512355/509821/100137872/619066/616849/540838/7…
bta01521	EGFR tyrosine kinase inhibitor resistance	78	-0.356956	-1.79282	0.00136645	0.00704576	0.00478707	7635	tags=65%, list=40%, signal=39%	281020/327672/282152/536051/100337091/282307/531391/281361/282002/527165/504526/535530/516598/282308/525931/537682/281161/404193/281769/507359/537201/535298/517948/540085/535742/100139219/525246/404181/533199/787914/280991/282306/407170/519920/407217/100137872/790875/508541/615013/613787/281987/286865/541140/785655/507196/280877/506322/282879/540786/280730/614570
bta04612	Antigen processing and presentation	78	-0.355993	-1.78798	0.00142056	0.0072121	0.00490009	10093	tags=78%, list=53%, signal=37%	100300510/282498/282495/493736/513869/514897/100296565/508720/281831/525727/282493/407098/444877/280943/616942/282535/538700/536558/282494/407173/281237/510417/515200/327711/282497/506214/282530/524959/282490/512672/539884/281281/613384/100139049/539241/615930/282491/281832/281827/280729/783680/509857/540190/282860/533050/281105/281713/100336105/100125917/767874/509006/504335/540760/281586/618733…
bta05031	Amphetamine addiction	64	0.381241	1.89535	0.00145072	0.00725361	0.00492829	896	tags=16%, list=5%, signal=15%	530719/509107/520277/525416/790867/282321/286852/532713/282322/533527
bta00563	Glycosylphosphatidylinositol (GPI)-anchor biosynthesis	25	-0.505115	-1.85879	0.00148413	0.00730992	0.00496655	5551	tags=68%, list=29%, signal=48%	513395/768015/504677/519213/100139601/504583/783989/511496/507080/525095/508700/509680/504724/768052/535138/523737/506830
bta05163	Human cytomegalovirus infection	221	-0.263904	-1.59915	0.00180785	0.00877337	0.00596086	5668	tags=66%, list=30%, signal=47%	327671/534492/280943/539277/616942/504531/788151/281797/282325/505740/281796/407771/287018/513478/617024/618470/407173/508888/407111/281603/327672/507437/541008/281043/530401/282323/504985/408018/327712/510417/529196/511220/282307/282291/281203/531391/282002/524959/281985/512672/282330/281875/282308/515640/537682/497017/535603/506270/317697/513340/282488/507359/511812/287026/537201/280729/783680/…
bta05165	Human papillomavirus infection	316	-0.243194	-1.5417	0.00187368	0.00896105	0.00608837	7616	tags=53%, list=40%, signal=33%	287017/536993/407111/505242/327672/280873/514561/281873/511602/282323/504985/510417/281641/514031/781865/282307/789485/538609/535043/445418/518884/531391/617638/445419/529939/527165/281530/506995/538536/512672/505267/785423/445420/540664/789216/281875/282308/508008/537682/528478/539203/787466/112446776/516433/515680/535321/506270/282488/530599/526572/524653/506618/516578/510814/100336926/537201/7…
bta05210	Colorectal cancer	87	-0.339714	-1.74652	0.0023572	0.0111125	0.00755013	10072	tags=77%, list=53%, signal=37%	513497/537176/538751/515125/533233/782690/781996/616744/534125/533652/507390/327671/504531/515303/100295476/533115/100296226/281020/327672/536051/282307/531391/505463/541218/538477/618405/537631/282308/513723/537682/540526/282089/526572/540248/414925/535376/535298/511077/517948/281440/511619/100139219/404181/281542/533199/540481/282382/516010/280991/282306/519357/408016/524530/407217/100137872/61…
bta04140	Autophagy - animal	142	-0.285701	-1.6165	0.00258454	0.0119352	0.00810907	4218	tags=39%, list=22%, signal=31%	100139219/404181/529146/533199/281105/767903/540873/505708/529808/514596/512685/507340/280991/282306/282691/787967/508631/534126/517263/539124/527278/534155/617367/100137872/282320/529148/514547/615013/508354/281897/506754/782743/286865/532261/112442685/541140/768316/524361/509970/514919/513829/532686/282883/506322/281814/508571/509084/533141/535820/507309/497199/531455/540786/539339/100125881/53…
bta05170	Human immunodeficiency virus 1 infection	212	-0.261148	-1.57348	0.00260404	0.0119352	0.00810907	9107	tags=67%, list=48%, signal=35%	407098/540642/534125/618737/513678/100301478/534526/539742/327671/534492/280943/539277/616942/515766/504531/524683/281797/282325/281796/287018/618470/407173/507162/281020/407111/281534/539224/327672/282152/541008/530401/535225/510417/100337091/282307/282291/534072/281203/531391/282002/519958/524959/512672/537631/338033/616948/282308/497017/504310/281536/506270/317697/513340/282488/511812/507731/5…
bta04064	NF-kappa B signaling pathway	106	-0.313131	-1.67205	0.00323852	0.0146399	0.00994672	10665	tags=79%, list=56%, signal=35%	281073/514735/522670/616179/280828/414347/100300510/518089/514978/100296565/281212/523360/515515/282151/539235/508105/280943/613667/533459/281839/282325/112445051/534996/282118/281214/535188/281408/281020/282152/514386/100337091/281048/530884/282291/505521/282387/505463/515377/519958/286764/618405/613947/515640/504994/511112/510393/281536/282420/286849/504507/509167/529146/536421/510427/616115/28…
bta03013	Nucleocytoplasmic transport	103	-0.319509	-1.69963	0.00363788	0.016223	0.0110223	6617	tags=57%, list=35%, signal=38%	511248/507478/510250/520351/538236/513270/540982/616114/616181/518768/506836/504716/100296970/534600/510004/787259/520924/510540/506561/614879/767620/100124498/504506/783596/100124428/523408/100337114/515573/532933/100125940/286807/504823/540457/614694/507738/512530/510568/112446383/100299503/505417/504307/504786/784219/529231/535264/524528/100139154/510797/784123/513043/513080/540111/513592/5151…
bta03250	Viral life cycle - HIV-1	61	-0.358643	-1.71038	0.00394051	0.0173382	0.01178	9255	tags=72%, list=48%, signal=37%	281374/407098/618737/782605/785768/505453/524683/506578/507162/510596/280873/789389/282011/513270/504925/533406/519808/616948/407194/497017/112446776/511751/511582/100298356/108771180/504458/527829/541306/521089/520580/540457/768231/616425/512799/112441507/510568/514420/504658/540158/613647/539357/281418/280872/511861
bta04912	GnRH signaling pathway	86	0.330112	1.77273	0.00405962	0.0176273	0.0119764	1255	tags=21%, list=7%, signal=20%	100337204/530719/509107/520277/525416/286883/512943/521196/532713/786886/510434/282322/100298939/525482/522921/281601/282162/511779
bta04215	Apoptosis - multiple species	34	-0.425323	-1.73112	0.00445899	0.0190589	0.0129491	4227	tags=47%, list=22%, signal=37%	537782/504851/281647/493999/527278/408016/534211/100140945/514090/282527/507481/523039/526279/493720/280730/510373
bta00030	Pentose phosphate pathway	28	0.463991	1.91943	0.00450484	0.0190589	0.0129491	333	tags=18%, list=2%, signal=18%	534402/509566/506544/514066/280808
bta04066	HIF-1 signaling pathway	105	0.306612	1.73346	0.00477416	0.0199427	0.0135496	817	tags=12%, list=4%, signal=12%	530719/509566/281181/540303/281274/506544/525416/507476/407183/788926/532713/510434/538519
bta03022	Basal transcription factors	42	-0.399339	-1.72504	0.00513766	0.0211929	0.014399	5222	tags=55%, list=27%, signal=40%	781912/516578/513231/507984/100137723/514443/785085/516001/510921/534669/515462/539938/532936/518030/511896/513510/536067/505702/615512/785612/511829/613818/100125238
bta05167	Kaposi sarcoma-associated herpesvirus infection	192	-0.261994	-1.55082	0.00538842	0.0219528	0.0149153	8750	tags=64%, list=46%, signal=35%	516008/505453/534492/613667/539277/616942/504531/614838/530001/281797/281839/515303/281796/534996/407771/287018/617024/408019/618470/281214/407173/327672/530401/408018/510417/529196/100337091/282307/282291/281203/531391/407772/515621/512672/507432/508619/537631/282308/497017/281161/112446776/317697/513340/282488/511812/510814/534815/537201/511077/517948/527410/100297344/533051/281440/286839/53574…
bta04613	Neutrophil extracellular trap formation	174	-0.265062	-1.54108	0.00554699	0.0223232	0.015167	8492	tags=56%, list=44%, signal=32%	281874/538911/281112/504531/508161/282325/787581/280958/532262/615091/504242/617434/615043/616776/616868/787465/104968456/104975676/281877/407124/282167/522719/508888/514214/281534/327672/517559/522960/513939/505183/100337091/282307/787269/531391/493686/282002/414346/281985/613618/281345/524808/281346/282308/104975683/281536/614974/281111/287026/493645/338039/781224/517948/281440/535742/404125/10…
bta04070	Phosphatidylinositol signaling system	93	-0.304279	-1.59209	0.00755073	0.030021	0.020397	7121	tags=61%, list=37%, signal=39%	537396/100337091/511124/282307/780855/518523/282002/534051/281985/537171/282308/100125224/506349/317697/535487/540877/287026/534815/537790/518435/282087/517948/100297344/100336936/790873/518488/532797/506348/282309/514596/536810/534793/282306/539889/326597/281879/538147/508236/538291/782743/615135/518371/281987/286865/614834/507860/521790/281865/540005/515135/534029/281878/615813/530577/615077/54…
bta04145	Phagosome	158	-0.264413	-1.52262	0.00803387	0.0315616	0.0214438	8002	tags=59%, list=42%, signal=34%	282535/538700/535605/281877/407124/282494/407173/513266/287017/537748/281534/787578/281555/317777/281873/100141266/112443216/510417/515200/327711/281641/281048/281311/282497/281368/282346/282229/506214/281530/282530/524959/282490/512672/281345/504244/782652/281875/510330/539241/507031/281346/533307/516259/282491/281536/281111/404053/534815/534206/511582/281440/407237/282405/782966/790873/533050/2…
bta05220	Chronic myeloid leukemia	76	-0.324667	-1.61679	0.00935989	0.0363384	0.0246893	7598	tags=63%, list=40%, signal=38%	281730/327672/282152/536051/282307/282291/531391/505463/541218/529631/618405/282308/537682/282089/540248/535376/535298/511077/517948/533590/281542/533199/616115/527418/616369/282382/280991/282306/535369/789892/519357/281854/524530/100137872/281855/532209/615013/514090/286865/541140/404126/507196/506322/511754/512841/508233/280730/510618
bta04668	TNF signaling pathway	114	-0.286367	-1.56084	0.00978271	0.0372391	0.0253012	8856	tags=65%, list=46%, signal=35%	282871/508105/281735/534492/280943/613667/281137/504531/615107/281839/535622/281309/282118/281214/327672/514386/541268/281043/327712/282307/282291/531391/519958/789216/407221/537631/338033/508608/523746/282308/281094/281915/531942/282488/507427/540892/785086/509827/517948/504408/529146/533199/616115/444867/280991/282306/281713/508431/618906/516039/281854/408016/512355/540944/100137872/281715/2818…
bta03440	Homologous recombination	41	-0.372212	-1.59194	0.00981757	0.0372391	0.0253012	7865	tags=76%, list=41%, signal=45%	507912/788127/527411/504844/507069/615896/534148/353120/768244/540574/519513/530961/522943/783256/617899/507620/100140639/537418/504796/526824/508607/281990/540886/100125299/529507/525093/533414/537616/789410/514749/617007
bta04024	cAMP signaling pathway	220	0.230683	1.47657	0.0102145	0.0383045	0.0260251	980	tags=10%, list=5%, signal=9%	518117/100337204/281716/530719/524624/537960/520277/515161/525416/512222/510026/521196/281553/532713/540568/510434/517688/282322/525482/511224/281371
bta05132	Salmonella infection	249	-0.235355	-1.44851	0.011715	0.0434378	0.0295127	7657	tags=58%, list=40%, signal=35%	511561/514214/281020/537748/282601/281534/327672/537690/514386/281555/513939/512480/100141266/112443216/537396/514327/282466/281048/282291/514371/531391/519958/538477/508361/531907/507215/527701/504244/537631/768062/510330/540381/533307/540619/507311/523424/282689/616366/281536/538559/281832/404053/507427/534815/100141038/338039/534206/281165/537790/613533/104968444/511077/511083/517948/518781/28…

## Sheet: TMOD4
ID	Description	setSize	enrichmentScore	NES	pvalue	p.adjust	qvalues	rank	leading_edge	core_enrichment
bta00510	N-Glycan biosynthesis	50	-0.616896	-2.76907	1e-10	4.79087e-09	3.17863e-09	4233	tags=70%, list=22%, signal=55%	504474/615012/506537/526256/615007/510138/282073/515771/504908/539837/281781/614624/530027/614538/537812/521539/509745/534248/537595/540845/540155/510682/534231/538899/507939/504346/535834/101906103/532645/100125314/506566/523737/516155/538731/507815
bta04141	Protein processing in endoplasmic reticulum	165	-0.420583	-2.42357	1e-10	4.79087e-09	3.17863e-09	3295	tags=47%, list=17%, signal=39%	511649/100298456/512589/777788/511682/497024/507689/514361/509488/767874/513253/512355/615027/531964/790870/513928/613403/790880/614471/528862/512530/530027/515784/614538/514090/512276/509646/511008/112442685/614959/507124/513829/508358/520650/513023/281373/541236/508465/781036/407129/538938/535820/516332/613357/505089/540155/506316/510682/534231/415110/504832/539931/517171/535071/541040/507939/5…
bta04142	Lysosome	134	-0.512522	-2.84563	1e-10	4.79087e-09	3.17863e-09	4343	tags=61%, list=23%, signal=48%	281838/281023/517031/404155/281105/515575/616331/531411/534524/504799/282218/509522/530164/521189/616804/281421/282148/782535/282657/616562/536359/513684/404156/508713/538401/286768/535407/512078/505684/281433/509715/505554/767602/338038/768040/529148/515935/281080/789125/100125267/507677/509610/510620/281897/512444/281291/515729/541272/511050/541071/327687/514761/281909/532742/535442/404187/5153…
bta04260	Cardiac muscle contraction	90	0.578639	3.2303	1e-10	4.79087e-09	3.17863e-09	831	tags=21%, list=4%, signal=20%	100337204/518117/781184/327703/537960/521616/785909/497015/515161/497019/282608/534061/540307/539969/510026/281544/282714/540568/519331
bta04261	Adrenergic signaling in cardiomyocytes	143	0.481685	2.97984	1e-10	4.79087e-09	3.17863e-09	932	tags=22%, list=5%, signal=21%	100337204/518117/781184/538100/327703/537960/530719/767949/521616/509107/618204/785909/497015/515161/520277/497019/100298789/282608/525416/540307/539969/510026/512943/281544/787607/532713/282714/540568/519331/282322/525482
bta05168	Herpes simplex virus 1 infection	296	-0.431579	-2.69504	1e-10	4.79087e-09	3.17863e-09	7483	tags=70%, list=39%, signal=43%	281020/281043/514386/281873/282152/327712/281237/100125304/510417/783760/533492/768054/100140999/786262/534063/504336/282307/504985/505521/282497/282291/538845/444866/100125413/506214/282530/524959/512672/282490/519958/512908/613384/508619/100848207/539022/512684/539241/100125579/112441496/515674/282491/282308/101905074/507268/101902926/100140756/282488/510078/521998/784893/510814/614310/537201/5…
bta05410	Hypertrophic cardiomyopathy	87	0.54061	3.0067	1.15562e-10	4.79087e-09	3.17863e-09	1011	tags=28%, list=5%, signal=26%	100337204/518117/781184/327703/521616/785909/497015/497019/282608/511961/540307/541308/280765/539969/281544/512665/506155/517059/282714/540568/519331/535372/538954/282644
bta04921	Oxytocin signaling pathway	143	0.446504	2.76219	1.16142e-10	4.79087e-09	3.17863e-09	1000	tags=24%, list=5%, signal=23%	533378/100337204/781184/327703/100139857/530719/521616/785909/520277/282608/511961/538479/515421/525416/512254/790867/282321/539969/521196/512665/286852/532713/518025/786886/521730/510434/519331/282322/533527/100298939/525482/538954/511224/281371
bta04922	Glucagon signaling pathway	97	0.503292	2.84027	1.33607e-10	4.89892e-09	3.25032e-09	966	tags=25%, list=5%, signal=24%	327664/530719/512571/786335/100336808/511783/509107/540682/515067/281274/520277/511961/506544/514066/525416/790867/282321/512665/286852/532713/282322/533527/538954/282304
bta04740	Olfactory transduction	281	0.351333	2.38424	2.23801e-10	7.38543e-09	4.90006e-09	4469	tags=72%, list=23%, signal=56%	530719/520277/785036/526623/785068/525416/540307/519183/528106/786149/526621/512948/784976/783917/783210/783884/532075/509884/532713/782678/282322/512441/507721/788891/107131705/100301071/527077/282162/617095/615739/618593/529284/784594/508468/282004/112441493/618717/281970/526047/505295/512399/526211/519616/112447517/786664/112441573/618396/104970118/514342/787779/788304/523389/618070/528422/516…
bta03040	Spliceosome	140	-0.426733	-2.38785	1.14682e-09	3.44045e-08	2.28266e-08	5877	tags=61%, list=31%, signal=42%	514932/614759/513577/574400/504381/112441916/112443614/281827/100140430/534600/509802/534894/614310/509425/540190/536093/613304/510529/515290/528991/507828/510177/100299693/526536/508312/509920/614922/613634/100124428/767817/531931/512584/540258/507371/539950/520046/522372/533700/507895/100301114/525110/767873/510474/528135/507240/326578/507066/508735/509591/615198/514003/508788/507738/534586/523…
bta05414	Dilated cardiomyopathy	91	0.501012	2.78936	1.30702e-09	3.5943e-08	2.38474e-08	1011	tags=25%, list=5%, signal=24%	100337204/518117/781184/327703/521616/785909/497015/497019/282608/540307/541308/280765/539969/281544/506155/517059/282714/540568/519331/535372/282322/525482/282644
bta05171	Coronavirus disease - COVID-19	242	-0.346143	-2.11196	6.48362e-09	1.64584e-07	1.09198e-07	9115	tags=69%, list=48%, signal=37%	618508/505647/404137/112441655/619131/534961/767925/281857/280943/507339/534125/112441463/504531/509968/281112/615107/280958/535668/282325/529660/538639/532262/534492/617435/281309/615300/514214/788861/281534/101902490/280873/281043/525408/767908/614872/337888/286868/327672/100337091/540702/514569/507270/282307/768327/539369/282002/506297/404142/326602/493686/282291/282052/531391/504413/515534/51…
bta05160	Hepatitis C	151	-0.396623	-2.2401	8.76384e-09	2.06576e-07	1.37059e-07	5268	tags=52%, list=28%, signal=38%	282488/537682/535321/510814/537201/512975/512405/519922/511077/535298/517948/347699/537782/281542/533199/510427/616115/509231/280991/282306/535369/100336105/281276/511435/507689/509855/533216/524530/408016/539124/100137872/281854/407217/512484/100138150/512355/282320/100140945/790875/615013/281855/508541/100048947/654488/286865/282527/514090/541140/282257/282258/539003/524361/100125591/513829/507…
bta04020	Calcium signaling pathway	231	0.34483	2.27703	2.529e-08	5.56381e-07	3.69146e-07	1074	tags=15%, list=6%, signal=14%	533378/100337204/615428/518117/508394/100139857/530719/540771/100336808/511783/536132/540682/540317/520277/525416/534061/540307/790867/326284/282321/618262/286852/282716/532713/518025/540568/517688/338035/282322/533527/525482/281371/617610/528416/613800
bta05412	Arrhythmogenic right ventricular cardiomyopathy	74	0.500276	2.65829	8.24045e-08	1.69959e-06	1.12764e-06	1011	tags=26%, list=5%, signal=24%	539375/100337204/518117/781184/327703/521616/785909/282608/540307/541308/280765/539969/506155/536607/517059/540568/519331/535372/282644
bta00010	Glycolysis / Gluconeogenesis	58	0.544975	2.72973	1.08809e-07	2.11218e-06	1.40138e-06	741	tags=26%, list=4%, signal=25%	534402/509566/512571/281181/281543/540303/515067/281274/506544/514066/280808/507476/788926/112447087/533785
bta04144	Endocytosis	236	-0.337189	-2.05249	1.17629e-07	2.15654e-06	1.43081e-06	6527	tags=56%, list=34%, signal=37%	112447442/520311/518839/507672/505628/540304/512672/534708/508582/512010/281861/511223/783379/532237/507199/497017/521413/528478/533406/516259/506374/523736/404193/100125224/281769/504750/512489/281827/524653/535376/532685/516048/515444/617385/100141038/514465/525906/540190/615866/514554/511582/538660/535742/533050/531459/535566/539779/523124/528153/789414/540709/539295/527418/508040/282382/61432…
bta04110	Cell cycle	123	-0.405758	-2.22232	1.50494e-07	2.61384e-06	1.73422e-06	6525	tags=61%, list=34%, signal=40%	100336564/510120/515301/618405/534579/535072/524925/511281/539924/282089/508043/112446776/515499/507731/522613/530333/281729/519018/540248/540537/327679/511077/540547/515476/281542/282370/616369/506970/616487/515376/516094/506740/526824/281668/533294/281061/520428/516010/513523/281667/524870/535369/523714/519409/281302/538238/504367/515462/510916/524530/540660/777693/517812/790875/537027/520188/5…
bta00513	Various types of N-glycan biosynthesis	41	-0.552774	-2.36255	3.28744e-07	5.42427e-06	3.59888e-06	4233	tags=63%, list=22%, signal=49%	504474/615012/506537/526256/615007/506184/515771/281781/614624/530027/614538/521539/534248/786974/540845/504468/510682/534231/538899/507939/504346/101906103/532645/100125314/618571/507815
bta03010	Ribosome	145	-0.381659	-2.13948	4.63616e-07	7.06196e-06	4.68545e-06	7921	tags=63%, list=41%, signal=37%	615300/399560/768042/788861/101902490/767908/614872/337888/286868/514569/507270/768327/506297/404142/326602/282052/504413/515534/510547/618702/507168/540965/615178/510615/506358/513031/286790/505603/504858/101902561/101907518/337890/539196/326582/515014/616065/404140/511051/505507/533310/508216/100299845/514966/282050/535056/506229/515238/286873/286839/507151/326584/286853/540129/513128/514046/50…
bta00531	Glycosaminoglycan degradation	20	-0.694087	-2.39073	4.70798e-07	7.06196e-06	4.68545e-06	3196	tags=75%, list=17%, signal=63%	616562/538401/789125/512444/541272/511050/535442/515397/515809/515687/786974/511607/504468/507188/618571
bta05164	Influenza A	167	-0.355057	-2.04513	6.5606e-07	9.41303e-06	6.24533e-06	8776	tags=68%, list=46%, signal=37%	281250/281857/538426/280943/504531/615107/505453/281839/282325/529660/538639/282535/538700/512136/280875/282494/281942/327694/514214/407111/280873/281043/525408/327712/281237/327672/282307/282497/493686/282291/531391/507054/506214/282530/507215/282490/534708/520351/508619/539241/282491/282308/281536/539974/282488/112446776/281156/510814/537201/104968444/519922/517948/540547/347699/537782/525246/7…
bta03008	Ribosome biogenesis in eukaryotes	76	-0.428743	-2.12205	4.97085e-06	6.83492e-05	4.53481e-05	7245	tags=64%, list=38%, signal=40%	112442867/531149/530688/513405/510315/512048/514267/618429/520351/112448582/507155/768075/507410/617906/404165/282420/505846/507369/360191/521240/540772/538548/540168/507132/511723/538915/512692/540457/782674/531274/517417/614984/515001/535163/510568/532864/525619/513043/514945/508270/514336/514870/614870/511306/505324/505600/617204/516289/515057
bta04621	NOD-like receptor signaling pathway	171	-0.339238	-1.9606	5.87799e-06	7.75895e-05	5.14788e-05	8708	tags=64%, list=46%, signal=35%	280943/613667/534125/508029/281112/529660/538639/616010/534492/539780/505101/282167/781710/281214/508888/514214/513924/504400/281020/281043/514386/525408/513939/512480/282152/327712/768054/327672/512486/282291/338472/531391/507432/281985/519958/537631/507664/510080/506759/281536/539513/528166/539974/317697/287026/281111/529195/286814/507427/507055/519754/338039/510814/281832/511531/537201/533661/…
bta00500	Starch and sucrose metabolism	31	0.588704	2.5262	7.73004e-06	9.60271e-05	6.37118e-05	1231	tags=42%, list=6%, signal=39%	327664/534402/517397/786335/280808/280812/788926/515366/539383/530330/505258/281565/505049
bta04210	Apoptosis	140	-0.35703	-1.99782	8.11575e-06	9.60271e-05	6.37118e-05	7483	tags=66%, list=39%, signal=41%	281020/514386/369025/100141266/282152/112443216/515200/541268/510967/327711/281350/327672/504336/282307/512730/505463/282291/531391/507215/504244/618405/537631/286764/282333/282308/317697/404053/510524/282488/516326/414925/104968444/517948/782966/537782/281542/281105/533199/616115/281647/526824/280991/282306/616804/507426/777788/540643/281879/493999/408016/100137872/509715/281854/540944/512355/53…
bta04022	cGMP-PKG signaling pathway	161	0.330202	2.07136	8.14775e-06	9.60271e-05	6.37118e-05	971	tags=16%, list=5%, signal=15%	533378/100337204/518117/537960/509107/515161/520277/281356/540307/512254/790867/533039/282321/100336730/510026/521196/286852/282716/518025/282714/540568/510434/533527/525482/511224
bta05212	Pancreatic cancer	75	-0.425103	-2.09687	1.42059e-05	0.000161653	0.000107253	7277	tags=71%, list=38%, signal=44%	282152/327672/536051/282307/505463/541218/531391/538477/618405/537631/513723/282308/282089/535376/510814/540248/537201/517948/514554/281440/100139219/281542/533199/404181/616115/616369/282382/280991/516010/282306/535369/523324/524530/519357/100137872/281854/407217/619066/100140945/615013/281855/508541/532712/286865/514090/541140/522159/505238/511754/508233/514749/280730/510618
bta04910	Insulin signaling pathway	133	0.347475	2.12171	1.90116e-05	0.000209128	0.000138751	1038	tags=19%, list=5%, signal=18%	784877/327664/786335/100336808/511783/540682/520277/511961/514066/788926/521196/512665/520454/282359/513859/100139988/786886/539466/510434/538519/282322/100298939/538954/782160/533171
bta03460	Fanconi anemia pathway	51	-0.472402	-2.13397	2.9184e-05	0.000310668	0.000206121	7577	tags=76%, list=40%, signal=46%	527411/507069/504844/613732/616549/541218/615637/534148/513606/353120/615553/522442/614063/618375/527039/523362/783256/507620/512193/618018/537418/515845/526097/618860/513626/516371/516328/515909/540886/100125299/510793/510858/100125287/281762/539681/614512/504869/515662/514749
bta03410	Base excision repair	33	-0.523068	-2.10679	3.14935e-05	0.000324777	0.000215482	5108	tags=73%, list=27%, signal=53%	515499/513458/444987/616242/617899/515343/518653/281630/513051/507426/282691/517825/281990/785457/615359/618306/520497/537616/505828/613730/100124507/616905/535203/511790
bta05162	Measles	138	-0.349505	-1.95506	3.39813e-05	0.00033526	0.000222437	9920	tags=73%, list=52%, signal=35%	281050/538436/781996/100296565/515105/506873/281862/281489/512613/618508/508105/281831/281250/539235/281857/534125/538276/504531/529660/282375/513266/104968644/327694/407111/281534/280873/281020/525408/282152/282307/493686/282291/282229/537631/281861/282308/281536/327682/281827/282488/282420/540426/510814/537201/525906/519922/540190/517948/540547/347699/537782/281542/529146/616115/280991/282306/5…
bta05100	Bacterial invasion of epithelial cells	75	-0.414179	-2.04299	3.4542e-05	0.00033526	0.000222437	5334	tags=57%, list=28%, signal=41%	538559/506270/540207/540614/517948/535742/281440/540085/527550/533188/282637/527418/281876/525427/281577/282306/506939/326600/531488/100140583/509821/540838/537203/281080/281597/504482/511612/532712/286865/280979/539003/404122/507196/539459/614345/538486/506605/512841/506596/281078/338049/508402/526848
bta00511	Other glycan degradation	23	-0.600095	-2.15378	4.25559e-05	0.000401242	0.000266215	3887	tags=57%, list=20%, signal=45%	541086/506184/509522/505554/515729/281909/786974/282272/504468/511345/507188/537087/618571
bta05203	Viral carcinogenesis	191	-0.310289	-1.83143	6.11171e-05	0.00056024	0.000371706	4903	tags=47%, list=26%, signal=35%	519018/537201/516578/785086/785291/535298/517948/509827/540547/513231/535742/533050/281440/510654/281542/533491/616115/616369/404125/100137723/515376/281713/533294/281061/282306/281667/524870/524770/510921/282148/509855/524530/506402/408016/509006/540944/533202/512355/528135/281715/522155/326578/511896/615013/513510/513928/281855/508541/517837/532712/615414/286865/514090/541140/785612/404126/5144…
bta04520	Adherens junction	70	-0.40636	-1.98521	6.59804e-05	0.000588474	0.000390439	10188	tags=84%, list=53%, signal=39%	505696/281848/539359/540674/280977/536092/505709/515125/782690/107131173/407102/327671/539235/505453/515303/520631/504492/408017/508150/533492/327672/531391/514637/512312/527263/112446776/508658/534360/535376/282420/540248/536759/535742/281440/282637/529146/540481/282382/515187/281577/524770/512072/507837/531488/407217/504856/507632/619066/504482/104968536/532712/507204/505580/280979/539003/40412…
bta04010	MAPK signaling pathway	287	0.255387	1.74307	9.99993e-05	0.0008325	0.000552345	971	tags=13%, list=5%, signal=12%	100337204/781184/327703/521616/509107/528415/785909/540317/282608/512254/790867/286883/326284/533039/282321/528390/519251/539969/512943/506660/521196/615432/286852/507245/541175/786886/281995/788091/510434/519331/538519/615727/282322/533527/100298939/281994/511224
bta05169	Epstein-Barr virus infection	210	-0.291089	-1.7426	0.000102315	0.0008325	0.000552345	10217	tags=69%, list=53%, signal=32%	281073/540378/534712/282498/100300510/513497/282495/515532/538436/781996/100296565/541184/521939/515515/525727/282493/512613/282223/618508/507390/508105/506087/280955/280943/534125/533459/538276/281874/616942/504531/407126/615107/281839/529660/534492/534996/282535/538700/617024/282494/407173/514813/281534/281057/534057/281020/525408/510417/100337091/282307/282497/505463/282291/541218/506214/28253…
bta04130	SNARE interactions in vesicular transport	32	-0.521902	-2.09355	0.00010318	0.0008325	0.000552345	5143	tags=66%, list=27%, signal=48%	507031/519624/519148/507409/539960/780809/788566/616923/513275/532261/614775/506198/511030/780850/507309/509758/616526/510909/614520/510312/613984
bta05161	Hepatitis B	159	-0.311992	-1.78683	0.000103432	0.0008325	0.000552345	5268	tags=47%, list=28%, signal=34%	282488/112446776/537682/515499/535376/510814/540248/537201/414925/785086/511077/535298/517948/509827/535742/537782/525246/281542/529146/533199/510427/616115/282382/281713/280991/282306/618906/281667/535369/533216/408016/539124/519357/100137872/281854/512484/516039/281715/788119/100140945/535490/615013/513928/281855/508541/286865/327687/541140/282257/353105/100125591/507481/539350/506322/529566/51…
bta04720	Long-term potentiation	62	0.43016	2.17496	0.000109508	0.000860422	0.00057087	1389	tags=31%, list=7%, signal=29%	530719/767949/509107/520277/525416/790867/282321/521196/286852/532713/510434/282322/533527/100298939/540421/281601/282162/540485/617095
bta01200	Carbon metabolism	107	0.361673	2.09904	0.000115375	0.000885435	0.000587465	698	tags=13%, list=4%, signal=13%	509566/512571/281181/281543/540303/515067/506544/514066/280808/507476/788926/286886/511090/538173
bta03030	DNA replication	35	-0.511542	-2.10512	0.000125375	0.000940311	0.000623875	8174	tags=83%, list=43%, signal=47%	508652/507912/613354/504844/515602/510120/539924/512830/515499/508389/616242/617899/504637/506970/518653/514842/281302/504367/534848/281990/517812/514682/785457/540969/514793/537616/613730/100124507/506240
bta04062	Chemokine signaling pathway	183	-0.303219	-1.76841	0.0001328	0.000973869	0.00064614	8812	tags=65%, list=46%, signal=35%	281735/327671/613667/538276/281796/530001/504531/614838/505740/615107/281797/788151/497018/281863/282325/534996/407771/618470/287018/281214/408019/516133/282136/508888/281603/541008/281043/525408/408018/282682/282323/327712/529196/327672/100337091/536051/519716/282307/281203/282291/531391/515621/407772/516104/281985/281345/506807/536517/497017/521413/513340/535603/282308/535530/511112/511671/2870…
bta00970	Aminoacyl-tRNA biosynthesis	44	-0.455217	-1.9887	0.000168056	0.00120562	0.0007999	6106	tags=64%, list=32%, signal=43%	504609/518874/286855/525350/506305/525894/504824/532903/509429/538772/281476/538357/509624/510075/282060/281576/512531/511740/615182/100847824/514586/100300732/281581/510937/514726/616033/536956/508907
bta00600	Sphingolipid metabolism	54	-0.426605	-1.97141	0.000179593	0.00126097	0.000836628	6779	tags=63%, list=35%, signal=41%	533538/514357/616901/100336736/533428/524460/617172/533103/505097/522515/617707/504545/530776/281433/505554/507207/516881/539223/510620/540732/282407/537972/509018/532742/786974/614165/507290/505514/504468/505558/507188/537087/618571/100336737
bta03060	Protein export	23	-0.566491	-2.03318	0.000222745	0.00153137	0.00101603	3781	tags=57%, list=20%, signal=45%	281504/514960/767917/614017/504842/538938/509430/541040/786732/506986/415113/505064/282078
bta05222	Small cell lung cancer	91	-0.362368	-1.87198	0.000237986	0.00160277	0.0010634	10387	tags=80%, list=54%, signal=37%	692183/511043/504943/281073/529670/534712/513497/100336873/317711/515011/538436/518914/781996/541184/512915/527124/781568/512613/280794/504531/520030/617024/506387/281020/514386/511602/282152/282876/535043/282307/505463/529939/282291/541218/618405/281875/282308/506270/530599/519018/511077/517948/537782/281542/616115/281876/281647/280991/282306/535369/616895/767985/524530/523526/408016/539124/5193…
bta05145	Toxoplasmosis	111	-0.340783	-1.83127	0.000268761	0.00177382	0.00117689	10284	tags=81%, list=54%, signal=38%	511043/281073/529670/282498/100138102/100336873/282495/518914/781996/508720/525727/282493/404074/518795/281831/281857/280943/534125/530001/614838/112445051/534492/520030/513478/282535/538700/506387/282494/281534/281020/514386/525408/282152/281237/282876/327672/535043/282497/282387/529939/282291/531391/515621/506214/414346/282530/282490/519958/537631/508619/539241/497017/282491/281536/282089/28684…
bta03420	Nucleotide excision repair	44	-0.444289	-1.94096	0.000315302	0.00204019	0.00135362	5108	tags=64%, list=27%, signal=47%	515499/522908/508389/507984/617899/504637/100137723/518653/514842/515462/519357/509602/281990/537958/516371/511896/513510/785457/615512/539668/524274/537616/511951/613730/511829/100124507/508601/100125238
bta05135	Yersinia infection	141	-0.307318	-1.72466	0.00042063	0.00266938	0.00177107	7491	tags=59%, list=39%, signal=36%	541008/281043/530401/508819/281873/512480/616969/327672/535225/535347/282307/282291/531391/508361/540304/519958/537631/524352/282308/281536/100125224/538559/506270/529195/526227/519754/516048/517948/535742/513377/533908/281440/527550/282846/529146/533199/510427/616115/281876/281577/280991/282306/616545/618906/326600/536654/507837/539124/509821/100137872/281854/516039/512355/619066/616849/540838/7…
bta04622	RIG-I-like receptor signaling pathway	74	-0.379357	-1.87484	0.000482715	0.00300558	0.00199413	4043	tags=41%, list=21%, signal=32%	529146/536421/616115/767903/519541/618906/510923/533216/506848/539124/281854/512355/535490/281855/539145/100125591/532686/507481/508378/506182/533141/504760/504727/504707/508233/523962/281871/516979/767932/493720
bta01524	Platinum drug resistance	74	-0.376523	-1.86084	0.000586384	0.00357771	0.00237373	10189	tags=78%, list=53%, signal=37%	518075/540378/513497/100138102/505709/781996/281805/785216/521685/777644/616744/504531/533652/516190/100296226/533115/407111/506093/281020/514386/615552/282152/327672/282307/517724/615637/531391/513606/353120/282308/541275/282488/540526/787696/414925/517948/537782/281542/616369/281647/518976/526824/280991/282306/408016/100137872/493719/537958/100140945/615013/286865/282097/514090/507481/537380/49…
bta01230	Biosynthesis of amino acids	70	0.382919	2.00073	0.000596631	0.00357771	0.00237373	642	tags=13%, list=3%, signal=12%	509566/512571/281181/281543/540303/515067/506544/507476/286886
bta03015	mRNA surveillance pathway	87	-0.364598	-1.85611	0.000607126	0.00357771	0.00237373	6290	tags=59%, list=33%, signal=39%	510604/520351/327689/280796/540982/504925/537131/525143/616181/516411/100296970/535321/534600/787259/783336/783569/282703/529071/516175/504506/100124428/532933/541270/282298/528728/533147/100138150/511408/282320/768231/101908085/533788/508491/100134966/281712/506507/505417/524361/518859/513043/784123/282588/505757/515145/338051/511555/282296/538724/510872/541013/507051
bta04971	Gastric acid secretion	71	0.371045	1.94425	0.000739377	0.00423044	0.0028068	932	tags=17%, list=5%, signal=16%	533378/537960/530719/515161/520277/525416/510026/532713/518025/280800/282322/525482
bta01521	EGFR tyrosine kinase inhibitor resistance	78	-0.367869	-1.83319	0.000743533	0.00423044	0.0028068	7483	tags=65%, list=39%, signal=40%	281020/282152/327672/100337091/536051/282307/282002/281361/527165/531391/504526/516598/525931/281161/282308/535530/404193/281769/507359/537682/537201/535298/517948/535742/525246/540085/100139219/533199/404181/787914/280991/282306/407170/519920/100137872/407217/790875/613787/615013/508541/286865/281987/541140/785655/507196/280877/506322/282879/540786/280730/614570
bta05163	Human cytomegalovirus infection	221	-0.272473	-1.64279	0.000810739	0.00453464	0.00300863	8708	tags=66%, list=46%, signal=36%	280943/539277/533440/281796/616942/504531/505740/281797/788151/282325/534492/407771/513478/617024/618470/287018/508888/407173/407111/281603/541008/281043/507437/530401/408018/282323/327712/510417/529196/327672/282307/504985/281203/282002/511220/282291/531391/524959/512672/281985/282330/281875/515640/497017/513340/535603/282308/317697/287026/511812/506270/282488/507359/537682/537201/785086/533661/…
bta04911	Insulin secretion	82	0.354207	1.93174	0.000867001	0.00469856	0.00311739	1316	tags=20%, list=7%, signal=18%	100337204/537960/530719/509107/515161/532060/525416/510026/534180/532713/282322/525482/408008/281601/282162/282029
bta00051	Fructose and mannose metabolism	33	0.462761	2.02362	0.000868523	0.00469856	0.00311739	515	tags=21%, list=3%, signal=21%	509566/281543/534928/506544/514066/407183/788926
bta04925	Aldosterone synthesis and secretion	92	0.338838	1.89113	0.000979819	0.00521517	0.00346014	1254	tags=18%, list=7%, signal=17%	100337204/537960/530719/509107/515161/520277/525416/528390/510026/532713/540245/517688/282322/525482/613800/281601/282162
bta05165	Human papillomavirus infection	316	-0.250786	-1.57115	0.00104964	0.0054981	0.00364786	7011	tags=50%, list=37%, signal=32%	514031/535043/789485/282307/504985/445418/781865/518884/514561/529939/617638/445419/527165/281641/531391/538609/506995/281530/538536/505267/512672/445420/785423/540664/789216/281875/508008/282308/528478/787466/516433/506270/282488/539203/530599/112446776/537682/526572/524653/535321/100336926/506618/767928/515680/510814/537201/516578/785086/785291/535298/517948/540547/510184/282705/511619/533050/7…
bta04071	Sphingolipid signaling pathway	117	-0.320568	-1.74676	0.00122115	0.00620648	0.00411785	6918	tags=60%, list=36%, signal=38%	282307/282002/533538/540305/531391/616901/538896/281985/537631/100336736/282308/287024/527263/287026/533103/535321/505097/517948/514554/522515/507041/281440/281542/533199/616115/530776/281791/280991/282306/618906/539123/536654/281790/533147/100137872/505611/100138150/512355/619066/282320/533788/516881/506783/515159/100134966/539223/510620/540732/286865/282527/517533/537972/541140/509018/524361/28…
bta00563	Glycosylphosphatidylinositol (GPI)-anchor biosynthesis	25	-0.517563	-1.91092	0.00124063	0.00620648	0.00411785	5379	tags=68%, list=28%, signal=49%	768015/513395/504677/100139601/519213/504583/783989/511496/507080/525095/508700/504724/509680/768052/535138/523737/506830
bta04080	Neuroactive ligand-receptor interaction	322	0.225597	1.56737	0.0012413	0.00620648	0.00411785	1169	tags=9%, list=6%, signal=8%	338070/539128/281716/790333/507053/282179/281963/613317/112441549/280728/281688/281191/540519/112444892/618262/281687/524064/528699/281553/532277/281689/338035/530065/281371/528416/509493/282237/282638
bta05170	Human immunodeficiency virus 1 infection	212	-0.270204	-1.61697	0.00140709	0.00693042	0.00459818	8719	tags=64%, list=46%, signal=35%	100301478/540642/280943/539277/534125/515766/281796/616942/504531/539742/281797/524683/282325/534492/618470/287018/507162/407173/407111/281534/539224/541008/281020/530401/282152/510417/327672/535225/100337091/282307/281203/282002/282291/531391/534072/524959/512672/519958/537631/338033/616948/497017/513340/282308/281536/504310/317697/511812/506270/282488/507731/533661/280729/783680/327679/10029835…
bta04140	Autophagy - animal	142	-0.294384	-1.65245	0.00147666	0.00716615	0.00475457	4149	tags=39%, list=22%, signal=31%	540873/100139219/281105/529146/533199/404181/505708/767903/512685/514596/529808/507340/280991/282306/508631/282691/787967/534126/517263/539124/100137872/534155/527278/617367/282320/529148/615013/514547/508354/281897/782743/506754/286865/112442685/541140/532261/524361/768316/509970/513829/514919/532686/282883/509084/506322/281814/533141/508571/535820/507309/497199/531455/540786/539339/100125881/53…
bta03013	Nucleocytoplasmic transport	103	-0.33251	-1.75707	0.00155267	0.0074258	0.00492684	6542	tags=58%, list=34%, signal=39%	510250/507804/511248/507478/538236/513270/520351/540982/616114/616181/518768/506836/504716/100296970/534600/787259/510004/520924/614879/510540/767620/506561/100124498/783596/504506/523408/100124428/100337114/515573/532933/100125940/286807/504823/614694/540457/507738/512530/510568/100299503/504307/112446383/784219/505417/504786/524528/529231/535264/510797/100139154/513043/784123/540111/513592/5130…
bta05031	Amphetamine addiction	64	0.367855	1.87916	0.00166549	0.00785158	0.00520934	893	tags=16%, list=5%, signal=15%	530719/509107/520277/525416/790867/282321/286852/532713/282322/533527
bta04115	p53 signaling pathway	76	-0.35655	-1.76473	0.00174306	0.00804054	0.00533471	7483	tags=61%, list=39%, signal=37%	281020/514225/282152/504985/505463/281530/514005/618405/515914/614920/282488/508167/104968444/327679/538512/540547/537782/519896/281542/616369/617931/526824/281668/281061/509863/282261/524530/408016/519357/616861/100140945/615414/507481/100137737/518897/519217/532527/507901/784541/504869/508875/511754/540786/280730/510618/510373
bta04612	Antigen processing and presentation	78	-0.353361	-1.7609	0.0017543	0.00804054	0.00533471	10162	tags=78%, list=53%, signal=37%	282498/100300510/493736/282495/513869/514897/100296565/508720/525727/282493/407098/444877/281831/280943/616942/282535/538700/282494/407173/536558/281237/515200/510417/327711/282497/506214/282530/524959/512672/282490/281281/539884/100139049/613384/539241/615930/282491/281827/281832/280729/783680/540190/282860/509857/533050/281105/281713/100336105/100125917/509006/767874/504335/540760/281586/618733…
bta04064	NF-kappa B signaling pathway	106	-0.317553	-1.69158	0.00234823	0.0106153	0.00704301	10808	tags=81%, list=57%, signal=35%	526392/616179/514735/508367/280828/522670/414347/281073/100300510/518089/514978/523360/100296565/281212/515515/282151/508105/539235/280943/613667/533459/112445051/281839/282325/534996/282118/535188/281214/281408/281020/514386/282152/100337091/281048/530884/505521/282387/505463/282291/515377/618405/519958/286764/515640/613947/504994/281536/511112/510393/286849/504507/282420/509167/529146/536421/51…
bta03250	Viral life cycle - HIV-1	61	-0.365785	-1.73489	0.00258918	0.0115463	0.00766073	9167	tags=72%, list=48%, signal=38%	407098/618737/281374/782605/505453/524683/785768/506578/507162/280873/510596/789389/282011/513270/504925/616948/497017/533406/407194/519808/112446776/511751/100298356/511582/108771180/527829/504458/541306/521089/520580/540457/768231/112441507/616425/512799/510568/514420/504658/540158/613647/539357/281418/280872/511861
bta05167	Kaposi sarcoma-associated herpesvirus infection	192	-0.271151	-1.60023	0.0026418	0.0116239	0.0077122	8695	tags=64%, list=46%, signal=35%	539277/613667/534125/281796/616942/530001/504531/614838/281797/505453/281839/534492/515303/534996/407771/617024/618470/287018/281214/408019/407173/530401/408018/510417/529196/327672/100337091/282307/281203/282291/531391/515621/407772/512672/507432/537631/508619/281161/497017/513340/282308/317697/511812/282488/112446776/510814/533051/537201/534815/511077/527410/517948/535742/100297344/286839/53305…
bta05210	Colorectal cancer	87	-0.337821	-1.7198	0.00284286	0.012344	0.00818997	9178	tags=70%, list=48%, signal=37%	533233/507390/616744/327671/534125/504531/533652/100295476/515303/100296226/533115/281020/327672/536051/282307/505463/541218/531391/538477/618405/537631/513723/282308/282089/537682/540526/526572/535376/540248/414925/511077/535298/517948/511619/281440/100139219/281542/533199/404181/540481/282382/280991/516010/282306/524530/408016/519357/100137872/407217/619066/100140945/790875/615013/286865/514090…
bta05220	Chronic myeloid leukemia	76	-0.342578	-1.69558	0.00366138	0.0156916	0.010411	7336	tags=63%, list=38%, signal=39%	281730/282152/327672/536051/282307/505463/282291/541218/531391/529631/618405/282308/282089/537682/535376/540248/511077/535298/517948/281542/533199/527418/616115/533590/616369/282382/280991/282306/535369/789892/524530/519357/100137872/281854/532209/615013/281855/286865/514090/541140/404126/507196/506322/511754/512841/508233/280730/510618
bta03022	Basal transcription factors	42	-0.403291	-1.7343	0.00389984	0.0164993	0.0109469	5517	tags=57%, list=29%, signal=41%	531109/781912/516578/513231/507984/785085/516001/100137723/514443/534669/510921/515462/539938/532936/518030/511896/513510/785612/536067/505702/615512/511829/613818/100125238
bta05213	Endometrial cancer	57	-0.367073	-1.70769	0.00421688	0.0176148	0.011687	7116	tags=65%, list=37%, signal=41%	327672/536051/282307/505463/541218/531391/618405/282308/535530/537682/540207/526572/511077/535298/517948/511619/282637/281542/533199/540481/280991/282306/524530/519357/100137872/407217/100140945/790875/615013/286865/514090/541140/539003/506322/526848/540786/280730
bta04912	GnRH signaling pathway	86	0.31113	1.70463	0.0044622	0.0184066	0.0122123	1312	tags=21%, list=7%, signal=20%	100337204/530719/509107/520277/525416/286883/512943/521196/532713/786886/510434/282322/100298939/525482/281601/522921/282162/511779
bta04066	HIF-1 signaling pathway	105	0.293946	1.70037	0.00454223	0.0185054	0.0122779	833	tags=12%, list=4%, signal=12%	509566/530719/281181/540303/281274/506544/525416/507476/407183/788926/532713/510434/538519
bta04070	Phosphatidylinositol signaling system	93	-0.311013	-1.6143	0.00478285	0.0192481	0.0127706	7105	tags=61%, list=37%, signal=39%	100337091/511124/537396/780855/282307/282002/518523/534051/281985/537171/282308/100125224/317697/287026/540877/506349/535487/537790/534815/518435/517948/282087/100297344/100336936/790873/506348/518488/282309/532797/534793/536810/514596/282306/539889/326597/281879/538147/538291/508236/615135/782743/286865/518371/281987/614834/521790/507860/281865/540005/515135/534029/281878/615813/530577/615077/54…
bta04613	Neutrophil extracellular trap formation	174	-0.27178	-1.57207	0.00494314	0.0196534	0.0130396	8548	tags=57%, list=45%, signal=32%	281874/504531/281112/280958/508161/538911/282325/787581/532262/534492/615091/615043/616776/616868/787465/104968456/104975676/617434/282167/281877/407124/508888/522719/514214/281534/504242/522960/513939/517559/505183/327672/100337091/282307/282002/787269/493686/531391/414346/281985/281345/524808/613618/281346/282308/281536/614974/104975683/287026/281111/493645/338039/517948/781224/535742/104975684…
bta04215	Apoptosis - multiple species	34	-0.422893	-1.72144	0.00514679	0.0202195	0.0134152	4843	tags=50%, list=25%, signal=37%	414925/537782/504851/281647/493999/408016/527278/100140945/534211/282527/514090/507481/523039/526279/493720/280730/510373
bta04145	Phagosome	158	-0.264748	-1.51316	0.00620304	0.0240824	0.0159781	8065	tags=59%, list=42%, signal=34%	282535/535605/538700/513266/281877/407124/282494/407173/281534/787578/281555/287017/281873/537748/317777/100141266/112443216/515200/510417/327711/281048/281311/282497/281368/281641/282229/281530/506214/282346/282530/524959/782652/512672/282490/281345/504244/281875/539241/281346/533307/510330/507031/282491/281536/516259/404053/281111/534206/534815/407237/511582/782966/533050/790873/282405/281440/2…
bta00030	Pentose phosphate pathway	28	0.45326	1.92259	0.00728653	0.0279599	0.0185508	340	tags=18%, list=2%, signal=18%	534402/509566/506544/514066/280808
bta03440	Homologous recombination	41	-0.393806	-1.68312	0.00820598	0.0309084	0.020507	8230	tags=76%, list=43%, signal=43%	788127/507912/527411/507069/504844/615896/534148/768244/353120/540574/519513/530961/783256/522943/507620/100140639/617899/537418/504796/526824/508607/281990/540886/100125299/529507/525093/533414/537616/789410/514749/617007
bta04668	TNF signaling pathway	114	-0.290287	-1.57736	0.00824224	0.0309084	0.020507	8973	tags=66%, list=47%, signal=35%	282871/508105/281735/280943/281137/613667/534125/504531/615107/281839/534492/535622/282118/281309/281214/281043/514386/327712/541268/327672/282307/282291/531391/519958/537631/407221/789216/338033/281094/282308/281915/523746/508608/282488/531942/507427/785086/540892/517948/509827/504408/529146/533199/616115/444867/281713/280991/282306/618906/508431/408016/100137872/281854/540944/516039/512355/2817…
bta05132	Salmonella infection	249	-0.240137	-1.46714	0.0102051	0.0378391	0.0251054	7483	tags=57%, list=39%, signal=35%	281020/282601/514386/281555/513939/537748/512480/100141266/112443216/282466/327672/281048/537690/537396/514327/282291/531391/514371/538477/508361/527701/507215/504244/519958/537631/768062/531907/282689/533307/510330/540619/616366/281536/507311/540381/538559/404053/523424/507427/338039/281165/281832/537790/534206/534815/613533/100141038/104968444/508874/511077/517948/407237/511083/518781/782966/28…
bta04024	cAMP signaling pathway	220	0.219269	1.4267	0.011527	0.0422657	0.0280423	1000	tags=10%, list=5%, signal=9%	100337204/518117/537960/524624/281716/530719/515161/520277/525416/512222/510026/521196/281553/532713/540568/510434/517688/282322/525482/511224/281371
bta05231	Choline metabolism in cancer	94	-0.299469	-1.55658	0.0126909	0.0460219	0.0305345	10610	tags=74%, list=56%, signal=33%	512311/514865/511887/530095/519461/520625/100138102/540674/539992/282001/107131173/513389/617624/327671/534125/533440/537654/504531/282325/100125779/508819/327672/282307/504985/511291/282002/518523/527165/531391/537631/537171/525931/513723/282308/100125224/537682/617172/505485/535298/517948/514554/507455/525072/526175/617707/281440/100139219/533199/404181/506348/504545/280991/282306/531488/100137…
bta03450	Non-homologous end-joining	13	-0.532133	-1.58893	0.0132607	0.0475657	0.0315587	8230	tags=92%, list=43%, signal=53%	788127/281120/522307/781252/513780/616242/510132/517886/525093/613590/531945/512740

## Sheet: LMOD3
ID	Description	setSize	enrichmentScore	NES	pvalue	p.adjust	qvalues	rank	leading_edge	core_enrichment
bta04141	Protein processing in endoplasmic reticulum	165	-0.419469	-2.42541	1e-10	5.39268e-09	3.59512e-09	3413	tags=48%, list=18%, signal=40%	512323/511649/100298456/512589/497024/507689/511682/777788/514361/509488/767874/512355/513253/531964/513928/790870/615027/613403/528862/790880/614471/512530/512276/514090/530027/614538/509646/515784/511008/112442685/614959/507124/513829/508358/520650/513023/281373/541236/508465/781036/407129/538938/613357/535820/516332/505089/506316/540155/510682/534231/415110/504832/535071/539931/517171/507939/5…
bta04142	Lysosome	134	-0.508903	-2.8406	1e-10	5.39268e-09	3.59512e-09	4139	tags=60%, list=22%, signal=47%	517031/404155/515575/281105/531411/616331/504799/534524/521189/282218/509522/282148/530164/616804/282657/281421/616562/782535/536359/513684/512078/286768/508713/404156/538401/505684/535407/281433/509715/505554/767602/338038/768040/529148/515935/281080/789125/100125267/507677/509610/510620/281897/512444/281291/541272/515729/511050/327687/514761/541071/404187/281909/532742/535442/515397/282883/5130…
bta04260	Cardiac muscle contraction	90	0.582962	3.21417	1e-10	5.39268e-09	3.59512e-09	829	tags=21%, list=4%, signal=20%	518117/100337204/327703/781184/537960/521616/785909/497015/515161/497019/282608/534061/540307/539969/510026/281544/282714/540568/519331
bta04261	Adrenergic signaling in cardiomyocytes	143	0.487879	2.97225	1e-10	5.39268e-09	3.59512e-09	919	tags=22%, list=5%, signal=21%	518117/538100/100337204/327703/781184/530719/537960/767949/521616/509107/618204/785909/520277/497015/515161/497019/282608/100298789/525416/540307/539969/512943/510026/281544/787607/532713/282714/540568/519331/282322/525482
bta05168	Herpes simplex virus 1 infection	296	-0.432259	-2.70809	1e-10	5.39268e-09	3.59512e-09	7643	tags=71%, list=40%, signal=43%	407173/407111/281020/281534/282152/783760/281043/514386/100125304/281873/327712/281237/534063/510417/533492/504336/768054/504985/100140999/786262/282291/505521/282307/282497/538845/100125413/444866/100125579/506214/519958/282530/524959/282490/512908/512672/100848207/512684/508619/613384/112441496/539241/539022/515674/282308/507268/282491/101905074/101902926/521998/282488/100140756/510078/614310/5…
bta05410	Hypertrophic cardiomyopathy	87	0.545065	2.97987	1.18986e-10	5.39268e-09	3.59512e-09	1003	tags=28%, list=5%, signal=26%	518117/100337204/327703/781184/521616/785909/497015/497019/282608/511961/540307/541308/280765/539969/281544/512665/506155/517059/282714/540568/519331/535372/538954/282644
bta04921	Oxytocin signaling pathway	143	0.453708	2.76407	1.23842e-10	5.39268e-09	3.59512e-09	983	tags=24%, list=5%, signal=23%	533378/100337204/327703/781184/100139857/530719/521616/785909/520277/282608/511961/538479/515421/525416/512254/790867/282321/539969/521196/512665/286852/532713/786886/521730/518025/510434/519331/282322/100298939/533527/525482/511224/538954/281371
bta00510	N-Glycan biosynthesis	50	-0.608967	-2.73771	1.30732e-10	5.39268e-09	3.59512e-09	4338	tags=70%, list=23%, signal=54%	504474/526256/615012/506537/510138/615007/282073/515771/504908/539837/281781/614624/530027/614538/537812/521539/509745/534248/540845/537595/540155/510682/534231/538899/507939/504346/535834/101906103/532645/100125314/506566/523737/516155/538731/507815
bta04740	Olfactory transduction	281	0.35251	2.3547	2.40348e-10	8.81276e-09	5.87517e-09	4664	tags=73%, list=24%, signal=56%	530719/520277/785036/526623/525416/785068/540307/519183/528106/786149/526621/512948/784976/783884/783917/783210/532075/509884/532713/782678/512441/282322/527077/282162/507721/788891/107131705/100301071/617095/529284/784594/615739/618593/282004/508468/112441493/618717/281970/526047/526211/618396/615901/522582/524985/514342/100295735/787779/788304/523389/514553/783203/504688/786765/521676/516409/50…
bta04922	Glucagon signaling pathway	97	0.509104	2.83819	6.78985e-10	2.24065e-08	1.49377e-08	976	tags=25%, list=5%, signal=24%	327664/530719/512571/100336808/786335/511783/509107/540682/515067/520277/281274/511961/506544/514066/525416/790867/282321/512665/286852/532713/282322/533527/538954/282304
bta03040	Spliceosome	140	-0.423204	-2.38096	7.83411e-10	2.35023e-08	1.56682e-08	5318	tags=57%, list=28%, signal=42%	112441916/281827/100140430/534894/509802/534600/112443614/509425/614310/510529/536093/613304/515290/528991/540190/507828/510177/526536/100299693/508312/613634/509920/614922/100124428/767817/531931/512584/507371/540258/539950/522372/520046/507895/533700/100301114/525110/528135/767873/510474/507240/326578/507066/508735/509591/615198/508788/514003/523250/507738/534586/506123/100299503/615156/787681/…
bta05414	Dilated cardiomyopathy	91	0.505608	2.78538	1.21142e-09	3.3314e-08	2.22094e-08	1003	tags=25%, list=5%, signal=24%	518117/100337204/327703/781184/521616/785909/497015/497019/282608/540307/541308/280765/539969/281544/506155/517059/282714/540568/519331/535372/282322/525482/282644
bta05171	Coronavirus disease - COVID-19	242	-0.344304	-2.1076	1.31074e-08	3.32726e-07	2.21818e-07	9010	tags=68%, list=47%, signal=36%	619131/505647/112441655/534125/767925/534961/507339/281857/280943/535668/534492/504531/281112/615107/509968/282325/112441463/529660/280958/538639/532262/617435/615300/281309/525408/788861/514214/281534/101902490/280873/281043/327672/767908/337888/614872/286868/507270/514569/100337091/540702/768327/506297/404142/539369/282291/326602/282307/282052/493686/282002/531391/504413/515534/618702/510547/53…
bta04020	Calcium signaling pathway	231	0.35057	2.2987	1.84623e-08	4.35182e-07	2.90121e-07	1326	tags=18%, list=7%, signal=17%	615428/518117/533378/100337204/508394/100139857/530719/100336808/540771/511783/536132/540682/520277/540317/525416/534061/540307/790867/326284/282321/618262/286852/282716/532713/518025/540568/517688/282322/338035/533527/525482/281371/528416/617610/613800/513057/281601/282162/540485/282119/534816
bta05160	Hepatitis C	151	-0.390682	-2.21353	3.10861e-08	6.83895e-07	4.5593e-07	4991	tags=50%, list=26%, signal=37%	510814/537201/512975/512405/511077/519922/517948/535298/537782/347699/533199/281542/510427/616115/509231/280991/282306/100336105/535369/281276/507689/511435/509855/539124/533216/524530/408016/281854/407217/512484/100137872/512355/282320/100138150/790875/100140945/281855/508541/615013/100048947/654488/514090/286865/282527/541140/524361/282257/539003/282258/513829/100125591/507481/506322/506182/533…
bta00010	Glycolysis / Gluconeogenesis	58	0.550017	2.73362	4.12672e-08	8.51135e-07	5.67423e-07	746	tags=26%, list=4%, signal=25%	534402/509566/512571/281181/540303/281543/515067/281274/506544/514066/280808/507476/788926/112447087/533785
bta04144	Endocytosis	236	-0.33523	-2.04244	8.63884e-08	1.67695e-06	1.11797e-06	7783	tags=63%, list=41%, signal=38%	506315/104968644/536671/613817/282136/407173/281849/512450/282601/508819/493642/510596/282682/510417/514423/515088/521864/505628/112447442/518839/520311/507672/534708/540304/512672/508582/511223/512010/281861/783379/507199/533406/532237/497017/506374/521413/528478/516259/512489/100125224/404193/523736/281769/504750/281827/524653/532685/516048/535376/617385/100141038/515444/514465/511582/525906/54…
bta05412	Arrhythmogenic right ventricular cardiomyopathy	74	0.505021	2.65297	1.51011e-07	2.76854e-06	1.84569e-06	1003	tags=26%, list=5%, signal=24%	518117/100337204/539375/327703/781184/521616/785909/282608/540307/541308/280765/539969/506155/536607/517059/540568/519331/535372/282644
bta04110	Cell cycle	123	-0.403571	-2.22354	1.66565e-07	2.89298e-06	1.92865e-06	6717	tags=62%, list=35%, signal=40%	100336564/505463/510120/534579/535072/515301/618405/524925/511281/539924/508043/282089/112446776/515499/519018/530333/281729/507731/522613/540248/540537/511077/327679/540547/515476/282370/281542/616369/506970/616487/515376/516094/533294/516010/526824/506740/281668/520428/281061/524870/513523/281667/535369/523714/515462/519409/538238/281302/504367/540660/510916/524530/777693/517812/790875/537027/5…
bta03010	Ribosome	145	-0.382164	-2.15556	3.29212e-07	5.432e-06	3.62133e-06	7291	tags=63%, list=38%, signal=40%	768042/615300/399560/788861/101902490/767908/337888/614872/286868/507270/514569/768327/506297/404142/326602/282052/504413/515534/618702/510547/507168/540965/615178/506358/510615/513031/286790/101902561/505603/504858/337890/539196/101907518/326582/515014/616065/511051/508216/404140/505507/533310/100299845/514966/282050/286873/535056/506229/515238/286839/507151/326584/513128/286853/540129/509426/78…
bta00531	Glycosaminoglycan degradation	20	-0.695717	-2.39592	3.64522e-07	5.7282e-06	3.8188e-06	3187	tags=75%, list=17%, signal=63%	616562/538401/789125/512444/541272/511050/535442/515397/515809/515687/511607/786974/504468/507188/618571
bta05164	Influenza A	167	-0.353547	-2.04534	1.05619e-06	1.58429e-05	1.05619e-05	8790	tags=68%, list=46%, signal=37%	538426/281250/281857/280943/505453/504531/615107/281839/282325/529660/538639/281942/280875/282535/512136/538700/327694/282494/525408/514214/407111/280873/281043/327672/327712/281237/282291/282307/282497/493686/531391/507054/506214/282530/534708/520351/282490/507215/508619/539241/282308/282491/281536/539974/112446776/282488/281156/510814/537201/104968444/519922/517948/540547/537782/347699/783596/5…
bta00513	Various types of N-glycan biosynthesis	41	-0.542956	-2.32021	1.38587e-06	1.98843e-05	1.32562e-05	4338	tags=63%, list=23%, signal=49%	504474/526256/615012/506537/506184/615007/515771/281781/614624/530027/614538/521539/534248/786974/540845/504468/510682/534231/538899/507939/504346/101906103/532645/100125314/618571/507815
bta04621	NOD-like receptor signaling pathway	171	-0.336437	-1.94753	7.52798e-06	0.00010351	6.90065e-05	8761	tags=64%, list=46%, signal=35%	508105/613667/280943/508029/534492/281112/529660/538639/616010/539780/505101/781710/281214/282167/508888/525408/514214/504400/281020/513924/282152/281043/514386/327672/512480/513939/327712/768054/512486/282291/338472/531391/519958/281985/537631/507432/507664/510080/506759/539513/281536/528166/529195/539974/317697/519754/281111/287026/281832/507427/286814/507055/510814/338039/537201/519513/511531/…
bta04210	Apoptosis	140	-0.355265	-1.99873	8.29787e-06	0.000109532	7.30213e-05	7600	tags=67%, list=40%, signal=41%	407111/281020/282152/514386/327672/369025/541268/100141266/112443216/510967/504336/327711/515200/281350/282291/512730/282307/505463/531391/507215/504244/618405/537631/286764/282333/282308/317697/282488/404053/510524/516326/414925/104968444/517948/782966/537782/533199/281542/616115/281105/281647/526824/280991/282306/616804/777788/507426/540643/281879/493999/408016/281854/509715/100137872/512355/54…
bta04022	cGMP-PKG signaling pathway	161	0.336165	2.08891	8.85788e-06	0.000110299	7.35329e-05	961	tags=16%, list=5%, signal=15%	518117/533378/100337204/537960/509107/520277/515161/281356/540307/512254/790867/533039/282321/100336730/510026/521196/286852/282716/518025/282714/540568/510434/533527/525482/511224
bta00500	Starch and sucrose metabolism	31	0.59475	2.53599	9.0245e-06	0.000110299	7.35329e-05	1233	tags=42%, list=6%, signal=39%	327664/534402/517397/786335/280808/280812/788926/515366/539383/530330/505258/281565/505049
bta03008	Ribosome biogenesis in eukaryotes	76	-0.42256	-2.10083	1.16068e-05	0.000136794	9.1196e-05	6904	tags=62%, list=36%, signal=40%	513405/510315/530688/512048/618429/514267/520351/507155/112448582/768075/507410/617906/404165/505846/282420/360191/507369/521240/540772/538548/507132/540168/511723/538915/512692/540457/782674/531274/517417/614984/510568/535163/515001/525619/532864/508270/513043/514945/514336/614870/514870/511306/505324/505600/617204/516289/515057
bta05162	Measles	138	-0.354017	-1.99064	1.42017e-05	0.000161605	0.000107737	9825	tags=73%, list=51%, signal=36%	538436/281050/506873/100296565/781996/515105/618508/281862/512613/281831/281489/539235/534125/508105/281250/281857/538276/504531/529660/282375/327694/513266/104968644/525408/407111/281020/281534/280873/282152/282291/282307/493686/282229/537631/281861/282308/327682/281536/282488/281827/282420/510814/540426/537201/519922/525906/517948/540190/540547/537782/347699/529146/281542/616115/280991/282306/5…
bta05212	Pancreatic cancer	75	-0.424496	-2.10324	1.53291e-05	0.00016862	0.000112413	7518	tags=72%, list=39%, signal=44%	507069/282152/327672/536051/282307/505463/541218/531391/538477/618405/537631/282308/513723/282089/540248/510814/535376/537201/517948/514554/281440/100139219/533199/404181/281542/616115/616369/282382/516010/280991/282306/523324/535369/524530/519357/281854/407217/100137872/619066/100140945/281855/508541/615013/532712/514090/286865/541140/522159/505238/511754/508233/514749/280730/510618
bta04910	Insulin signaling pathway	133	0.35404	2.12381	2.13173e-05	0.000226926	0.000151284	1202	tags=20%, list=6%, signal=19%	327664/784877/100336808/786335/511783/540682/520277/511961/514066/521196/788926/512665/520454/282359/513859/786886/100139988/539466/510434/538519/282322/100298939/538954/782160/533171/540421/518180
bta04520	Adherens junction	70	-0.408309	-1.99069	3.45326e-05	0.000356118	0.000237412	10153	tags=84%, list=53%, signal=40%	540674/505696/280977/281848/505709/539359/536092/515125/782690/107131173/407102/539235/327671/505453/515303/520631/504492/408017/327672/508150/533492/531391/514637/512312/112446776/508658/527263/534360/282420/540248/535376/536759/535742/281440/282637/529146/540481/282382/515187/281577/524770/512072/507837/531488/407217/504856/507632/619066/504482/532712/104968536/507204/505580/280979/539003/40412…
bta05100	Bacterial invasion of epithelial cells	75	-0.411791	-2.04028	4.01952e-05	0.000401952	0.000267968	5360	tags=57%, list=28%, signal=41%	540207/506270/538559/540614/517948/535742/281440/527550/540085/282637/533188/527418/281876/525427/281577/282306/506939/326600/531488/100140583/509821/540838/281080/537203/281597/504482/532712/511612/280979/286865/539003/404122/507196/539459/614345/538486/506605/512841/506596/281078/338049/508402/526848
bta03460	Fanconi anemia pathway	51	-0.466559	-2.11289	5.5201e-05	0.000535774	0.000357183	7710	tags=76%, list=40%, signal=46%	527411/613732/504844/507069/616549/615637/541218/534148/513606/353120/522442/615553/614063/618375/527039/523362/783256/507620/512193/537418/618018/515845/526097/618860/513626/516371/516328/540886/515909/100125299/510793/510858/100125287/281762/539681/614512/504869/515662/514749
bta04062	Chemokine signaling pathway	183	-0.309198	-1.81	5.81058e-05	0.000547854	0.000365236	8776	tags=66%, list=46%, signal=36%	533455/281735/327671/613667/538276/504531/615107/614838/281797/530001/788151/497018/281863/282325/505740/281796/534996/407771/287018/408019/618470/281214/516133/508888/282136/525408/281603/541008/281043/327672/282682/536051/282323/408018/327712/529196/100337091/519716/282291/282307/281203/531391/407772/515621/516104/281985/281345/506807/535530/282308/497017/521413/536517/535603/511112/512489/5116…
bta01200	Carbon metabolism	107	0.367517	2.10169	7.19722e-05	0.000659745	0.00043983	691	tags=13%, list=4%, signal=13%	509566/512571/281181/540303/281543/515067/506544/514066/280808/507476/788926/286886/511090/538173
bta04010	MAPK signaling pathway	287	0.262229	1.76032	7.48557e-05	0.000667632	0.000445088	961	tags=13%, list=5%, signal=12%	100337204/327703/781184/521616/509107/528415/785909/540317/282608/512254/790867/286883/326284/533039/282321/528390/519251/539969/506660/512943/521196/615432/286852/507245/541175/786886/281995/788091/510434/538519/519331/615727/282322/100298939/533527/281994/511224
bta00511	Other glycan degradation	23	-0.589661	-2.11573	7.81779e-05	0.000668401	0.000445601	4013	tags=57%, list=21%, signal=45%	541086/506184/509522/505554/515729/281909/786974/282272/504468/511345/507188/537087/618571
bta04130	SNARE interactions in vesicular transport	32	-0.521821	-2.08634	7.89928e-05	0.000668401	0.000445601	5753	tags=66%, list=30%, signal=46%	507031/519624/507409/519148/780809/539960/788566/616923/513275/532261/614775/506198/780850/511030/507309/509758/616526/510909/614520/510312/613984
bta04720	Long-term potentiation	62	0.441151	2.19651	8.14917e-05	0.000672306	0.000448204	1265	tags=29%, list=7%, signal=27%	530719/767949/509107/520277/525416/790867/282321/521196/286852/532713/510434/282322/100298939/533527/540421/281601/282162/540485
bta03410	Base excision repair	33	-0.520543	-2.09156	9.31035e-05	0.00073621	0.000490807	5151	tags=73%, list=27%, signal=53%	515499/513458/444987/616242/617899/515343/518653/281630/513051/282691/507426/517825/281990/785457/615359/618306/520497/537616/505828/613730/100124507/616905/535203/511790
bta05203	Viral carcinogenesis	191	-0.305871	-1.8078	9.36995e-05	0.00073621	0.000490807	4945	tags=47%, list=26%, signal=35%	516578/767928/537201/785291/785086/517948/535298/509827/513231/540547/535742/281440/533050/404125/510654/281542/100137723/616115/533491/616369/515376/533294/282306/281713/510921/281061/524870/281667/282148/524770/509855/506402/524530/408016/509006/512355/533202/540944/528135/281715/326578/522155/513928/513510/281855/511896/508541/615013/517837/532712/615414/514090/286865/785612/541140/404126/5144…
bta05161	Hepatitis B	159	-0.312468	-1.79262	0.000167213	0.00128327	0.000855511	5458	tags=48%, list=29%, signal=34%	281536/537682/282089/112446776/282488/515499/540248/510814/535376/537201/414925/785086/511077/517948/535298/509827/535742/537782/525246/529146/533199/281542/510427/616115/282382/280991/282306/281713/281667/535369/618906/539124/533216/519357/408016/281854/516039/512484/100137872/281715/788119/100140945/535490/513928/281855/508541/615013/286865/327687/541140/282257/353105/100125591/539350/507481/50…
bta05169	Epstein-Barr virus infection	210	-0.284838	-1.70789	0.000178097	0.00133573	0.000890484	10534	tags=70%, list=55%, signal=32%	281073/540059/540378/522670/534712/617389/513497/282498/100300510/515532/541184/282495/538436/100296565/781996/521939/515515/618508/512613/525727/282493/282223/507390/534125/508105/506087/280943/533459/616942/280955/538276/281874/534492/504531/615107/407126/281839/529660/534996/282535/538700/514813/617024/282494/525408/407173/281020/281057/281534/534057/510417/100337091/282291/282307/282497/50546…
bta03030	DNA replication	35	-0.495959	-2.04087	0.000228307	0.00167425	0.00111617	8500	tags=83%, list=45%, signal=46%	508652/507912/613354/504844/515602/510120/539924/512830/515499/508389/616242/617899/504637/506970/518653/514842/281302/504367/534848/281990/517812/514682/785457/540969/537616/514793/613730/100124507/506240
bta03060	Protein export	23	-0.561611	-2.01508	0.000258713	0.00185599	0.00123732	3906	tags=57%, list=20%, signal=45%	281504/514960/767917/614017/504842/538938/509430/541040/786732/506986/415113/282078/505064
bta05135	Yersinia infection	141	-0.309388	-1.73964	0.000274852	0.00192981	0.00128654	7415	tags=59%, list=39%, signal=36%	541008/508819/281043/327672/530401/281873/512480/616969/535225/535347/282291/282307/531391/508361/519958/540304/537631/524352/282308/281536/100125224/529195/506270/538559/526227/519754/516048/517948/535742/533908/513377/281440/527550/529146/533199/282846/510427/616115/281876/281577/280991/282306/616545/618906/536654/326600/507837/539124/281854/509821/516039/100137872/512355/619066/616849/540838/7…
bta00970	Aminoacyl-tRNA biosynthesis	44	-0.453566	-1.99064	0.000297085	0.00204246	0.00136164	6179	tags=64%, list=32%, signal=43%	504609/518874/286855/525350/506305/525894/504824/532903/509429/538772/281476/538357/509624/510075/282060/512531/281576/511740/615182/100847824/100300732/514586/281581/510937/514726/616033/536956/508907
bta00600	Sphingolipid metabolism	54	-0.424791	-1.96752	0.000350131	0.00235803	0.00157202	5801	tags=57%, list=30%, signal=40%	100336736/533428/524460/617172/533103/505097/522515/617707/504545/530776/281433/505554/507207/516881/539223/510620/282407/540732/537972/509018/532742/786974/614165/507290/505514/504468/505558/507188/537087/618571/100336737
bta05145	Toxoplasmosis	111	-0.330111	-1.78065	0.000510081	0.00332719	0.00221812	10090	tags=78%, list=53%, signal=37%	282498/100336873/529670/282495/518914/781996/508720/525727/281831/282493/404074/534125/518795/281857/280943/534492/614838/530001/112445051/520030/282535/513478/538700/506387/282494/525408/281020/281534/282152/514386/327672/282876/281237/535043/282291/529939/282497/282387/531391/515621/506214/414346/519958/282530/282490/537631/508619/539241/497017/282491/281536/282089/286849/281827/530599/510814/5…
bta01230	Biosynthesis of amino acids	70	0.388115	2.02228	0.000517427	0.00332719	0.00221812	647	tags=13%, list=3%, signal=12%	509566/512571/281181/540303/281543/515067/506544/507476/286886
bta04071	Sphingolipid signaling pathway	117	-0.323982	-1.76849	0.000533035	0.00332719	0.00221812	6825	tags=60%, list=36%, signal=39%	533538/282307/282002/531391/540305/616901/281985/538896/537631/100336736/282308/287024/535321/527263/287026/533103/505097/517948/514554/522515/507041/281440/533199/281542/616115/530776/281791/280991/282306/618906/539123/536654/533147/281790/100137872/505611/512355/282320/100138150/619066/533788/516881/100134966/515159/506783/539223/510620/540732/517533/286865/282527/537972/541140/509018/524361/28…
bta03420	Nucleotide excision repair	44	-0.440808	-1.93465	0.000551424	0.00332719	0.00221812	5151	tags=64%, list=27%, signal=47%	515499/508389/522908/507984/617899/100137723/504637/518653/514842/515462/509602/519357/537958/281990/516371/513510/511896/785457/615512/539668/524274/537616/511951/511829/613730/100124507/508601/100125238
bta04622	RIG-I-like receptor signaling pathway	74	-0.377111	-1.8689	0.000552807	0.00332719	0.00221812	4088	tags=41%, list=21%, signal=32%	529146/536421/616115/767903/519541/618906/510923/506848/539124/533216/281854/512355/535490/281855/539145/100125591/532686/507481/508378/506182/533141/504760/504727/504707/508233/523962/281871/516979/767932/493720
bta04911	Insulin secretion	82	0.359437	1.93489	0.000554531	0.00332719	0.00221812	1329	tags=20%, list=7%, signal=18%	100337204/530719/537960/509107/515161/532060/525416/510026/534180/532713/282322/525482/408008/281601/282162/282029
bta03015	mRNA surveillance pathway	87	-0.359145	-1.83795	0.000624099	0.00367773	0.00245182	6388	tags=59%, list=33%, signal=39%	510604/280796/520351/327689/540982/504925/537131/525143/616181/535321/100296970/516411/534600/787259/783569/783336/282703/529071/516175/504506/100124428/532933/541270/528728/282298/533147/511408/282320/100138150/768231/533788/101908085/100134966/508491/281712/506507/505417/524361/518859/784123/513043/282588/505757/515145/338051/511555/282296/538724/510872/541013/507051
bta05222	Small cell lung cancer	91	-0.34897	-1.80687	0.000725862	0.00420183	0.00280122	10641	tags=80%, list=56%, signal=36%	504943/281073/692183/534712/511043/513497/317711/100336873/529670/515011/512915/541184/518914/538436/781996/781568/512613/527124/280794/504531/520030/617024/506387/281020/282152/514386/511602/282876/535043/282291/282307/529939/505463/541218/618405/281875/282308/506270/530599/519018/511077/517948/537782/281542/616115/281876/281647/280991/282306/535369/767985/539124/616895/523526/524530/519357/4080…
bta01524	Platinum drug resistance	74	-0.372653	-1.8468	0.000738504	0.00420183	0.00280122	10680	tags=81%, list=56%, signal=36%	520925/782359/540378/100138102/518075/513497/505709/785216/281805/521685/781996/777644/616744/533652/504531/516190/100296226/533115/506093/407111/281020/615552/282152/514386/327672/615637/282307/517724/531391/513606/353120/282308/540526/541275/282488/414925/787696/517948/537782/281542/616369/518976/281647/526824/280991/282306/408016/537958/100137872/493719/100140945/615013/282097/514090/286865/50…
bta04925	Aldosterone synthesis and secretion	92	0.346718	1.90789	0.000855285	0.0047838	0.0031892	1236	tags=18%, list=6%, signal=17%	100337204/530719/537960/509107/520277/515161/525416/528390/510026/532713/540245/517688/282322/525482/613800/281601/282162
bta00051	Fructose and mannose metabolism	33	0.469275	2.03934	0.000902936	0.00491144	0.0032743	515	tags=21%, list=3%, signal=21%	509566/281543/534928/506544/514066/407183/788926
bta04971	Gastric acid secretion	71	0.376554	1.9639	0.000907873	0.00491144	0.0032743	919	tags=17%, list=5%, signal=16%	533378/530719/537960/520277/515161/525416/510026/532713/518025/280800/282322/525482
bta04115	p53 signaling pathway	76	-0.363797	-1.80868	0.00104454	0.00555967	0.00370644	5428	tags=50%, list=28%, signal=36%	515914/614920/282488/508167/104968444/327679/540547/538512/519896/537782/281542/617931/616369/526824/281668/281061/509863/282261/524530/519357/408016/616861/100140945/615414/507481/100137737/518897/519217/532527/784541/507901/504869/508875/511754/540786/280730/510618/510373
bta05163	Human cytomegalovirus infection	221	-0.268726	-1.63043	0.00116489	0.00610181	0.00406788	8708	tags=66%, list=46%, signal=36%	327671/539277/280943/616942/534492/504531/281797/788151/282325/505740/281796/407771/513478/287018/617024/618470/508888/407173/407111/281603/507437/541008/281043/327672/530401/282323/408018/327712/510417/529196/504985/282291/511220/282307/281203/282002/531391/524959/512672/281985/282330/281875/515640/282308/497017/535603/537682/513340/317697/506270/282488/287026/507359/511812/537201/280729/783680/…
bta05165	Human papillomavirus infection	316	-0.244831	-1.54461	0.00119663	0.00617011	0.00411341	7185	tags=51%, list=38%, signal=32%	282323/510417/514561/504985/514031/535043/789485/445418/281641/518884/538609/781865/282307/529939/445419/617638/531391/281530/527165/506995/538536/445420/512672/505267/540664/785423/281875/789216/508008/282308/528478/787466/516433/537682/539203/112446776/506270/282488/535321/515680/524653/526572/530599/506618/100336926/510814/516578/767928/537201/785291/785086/517948/535298/540547/510184/282705/2…
bta01521	EGFR tyrosine kinase inhibitor resistance	78	-0.360755	-1.80461	0.00139195	0.00701478	0.00467652	7591	tags=65%, list=40%, signal=40%	281020/282152/327672/536051/100337091/281361/282307/282002/531391/527165/504526/516598/535530/525931/282308/281161/537682/404193/281769/507359/537201/517948/535298/535742/540085/100139219/525246/533199/404181/787914/280991/282306/407170/519920/407217/100137872/790875/508541/613787/615013/286865/281987/541140/785655/507196/280877/506322/282879/540786/280730/614570
bta05031	Amphetamine addiction	64	0.374775	1.88705	0.00140296	0.00701478	0.00467652	897	tags=16%, list=5%, signal=15%	530719/509107/520277/525416/790867/282321/286852/532713/282322/533527
bta04080	Neuroactive ligand-receptor interaction	322	0.229701	1.57421	0.00143806	0.00708298	0.00472199	1111	tags=8%, list=6%, signal=8%	281716/539128/338070/790333/613317/282179/281963/507053/112441549/280728/281688/540519/112444892/281191/618262/281687/524064/528699/281553/281689/532277/338035/530065/281371/528416/509493/282237
bta00563	Glycosylphosphatidylinositol (GPI)-anchor biosynthesis	25	-0.508744	-1.8765	0.00159545	0.00774262	0.00516175	5518	tags=68%, list=29%, signal=48%	768015/513395/504677/100139601/519213/504583/783989/511496/507080/525095/508700/509680/504724/768052/535138/523737/506830
bta04612	Antigen processing and presentation	78	-0.356527	-1.78346	0.00165708	0.00792514	0.00528343	10090	tags=78%, list=53%, signal=37%	282498/100300510/493736/282495/513869/514897/100296565/508720/525727/281831/282493/407098/444877/280943/616942/282535/538700/282494/536558/407173/281237/510417/327711/515200/282497/506214/282530/524959/282490/512672/281281/539884/100139049/613384/539241/615930/282491/281827/281832/280729/783680/540190/509857/282860/533050/281105/281713/100336105/100125917/767874/509006/504335/540760/281586/618733…
bta04140	Autophagy - animal	142	-0.290356	-1.63617	0.00186351	0.00878513	0.00585676	4180	tags=39%, list=22%, signal=31%	100139219/529146/533199/404181/281105/540873/505708/767903/512685/529808/514596/507340/280991/282306/508631/282691/787967/534126/517263/539124/534155/527278/100137872/617367/282320/529148/514547/615013/508354/281897/782743/506754/286865/112442685/541140/532261/524361/768316/509970/514919/513829/532686/282883/506322/281814/509084/533141/508571/535820/507309/497199/531455/540786/539339/100125881/53…
bta05170	Human immunodeficiency virus 1 infection	212	-0.265826	-1.59578	0.00236074	0.0109725	0.00731498	9083	tags=67%, list=48%, signal=35%	407098/618737/513678/540642/534125/534526/539742/327671/539277/100301478/280943/515766/616942/534492/504531/281797/524683/282325/281796/287018/618470/507162/407173/539224/407111/281020/281534/282152/541008/327672/530401/535225/510417/100337091/282291/282307/281203/534072/282002/531391/519958/524959/512672/537631/338033/616948/282308/497017/504310/281536/513340/317697/506270/282488/511812/507731/5…
bta04064	NF-kappa B signaling pathway	106	-0.315378	-1.68102	0.00255034	0.0116891	0.00779272	10609	tags=79%, list=56%, signal=35%	616179/514735/281073/280828/522670/414347/100300510/518089/514978/523360/100296565/281212/515515/282151/539235/508105/613667/280943/533459/281839/282325/112445051/534996/281214/535188/282118/281408/281020/282152/514386/100337091/281048/530884/282291/505521/505463/282387/515377/519958/618405/286764/613947/515640/504994/510393/511112/281536/286849/282420/504507/509167/529146/536421/510427/616115/28…
bta05210	Colorectal cancer	87	-0.33701	-1.72467	0.00267951	0.0121128	0.00807522	10172	tags=77%, list=53%, signal=36%	537176/513497/538751/515125/781996/782690/533233/616744/507390/534125/533652/327671/504531/100295476/515303/100296226/533115/281020/327672/536051/282307/505463/541218/531391/538477/618405/537631/282308/513723/537682/282089/540526/526572/540248/535376/414925/511077/517948/535298/511619/281440/100139219/533199/404181/281542/540481/282382/516010/280991/282306/524530/519357/408016/407217/100137872/61…
bta03250	Viral life cycle - HIV-1	61	-0.366074	-1.74309	0.00281792	0.0125664	0.0083776	9136	tags=72%, list=48%, signal=38%	281374/407098/618737/782605/785768/505453/524683/506578/507162/280873/510596/789389/282011/513270/504925/616948/533406/519808/497017/407194/112446776/511751/100298356/511582/108771180/504458/527829/541306/521089/520580/540457/768231/616425/512799/112441507/510568/514420/504658/540158/613647/539357/281418/280872/511861
bta03013	Nucleocytoplasmic transport	103	-0.323345	-1.71636	0.00298929	0.0131529	0.00876858	6545	tags=57%, list=34%, signal=38%	511248/507478/510250/538236/520351/513270/540982/616114/518768/616181/506836/504716/100296970/534600/510004/520924/787259/614879/510540/506561/767620/100124498/783596/504506/100124428/523408/100337114/532933/515573/100125940/286807/504823/540457/614694/507738/512530/510568/504307/100299503/112446383/784219/505417/504786/529231/535264/524528/100139154/510797/784123/513043/540111/513080/513592/5151…
bta05167	Kaposi sarcoma-associated herpesvirus infection	192	-0.266269	-1.57368	0.00323993	0.0140681	0.00937876	8729	tags=64%, list=46%, signal=35%	516008/539277/613667/505453/616942/534492/504531/614838/281797/530001/281839/281796/515303/534996/407771/287018/408019/617024/618470/281214/407173/327672/530401/408018/510417/529196/100337091/282291/282307/281203/531391/407772/515621/512672/537631/507432/508619/282308/497017/281161/513340/317697/112446776/282488/511812/510814/534815/537201/511077/533051/517948/527410/100297344/535742/286839/28144…
bta04066	HIF-1 signaling pathway	105	0.300729	1.72088	0.00365562	0.0156669	0.0104446	827	tags=12%, list=4%, signal=12%	530719/509566/281181/540303/281274/506544/525416/507476/407183/788926/532713/510434/538519
bta04613	Neutrophil extracellular trap formation	174	-0.271871	-1.57545	0.00430207	0.0182011	0.012134	8506	tags=57%, list=45%, signal=32%	281874/534492/504531/281112/508161/538911/282325/787581/280958/532262/615091/615043/616776/616868/787465/104968456/104975676/617434/504242/281877/407124/282167/522719/508888/514214/281534/522960/517559/327672/513939/505183/100337091/787269/282307/493686/282002/531391/414346/281985/281345/524808/613618/281346/282308/281536/104975683/614974/281111/287026/493645/338039/517948/781224/535742/281440/10…
bta04912	GnRH signaling pathway	86	0.32265	1.74963	0.00446982	0.0186714	0.0124476	1263	tags=21%, list=7%, signal=20%	100337204/530719/509107/520277/525416/286883/512943/521196/532713/786886/510434/282322/100298939/525482/281601/522921/282162/511779
bta04070	Phosphatidylinositol signaling system	93	-0.310392	-1.61832	0.00477284	0.0196116	0.0130744	7059	tags=61%, list=37%, signal=39%	511124/537396/100337091/780855/282307/282002/518523/534051/281985/537171/282308/100125224/317697/540877/506349/287026/535487/534815/537790/518435/517948/282087/100297344/100336936/790873/518488/282309/532797/506348/536810/514596/534793/282306/539889/326597/281879/538147/508236/538291/782743/615135/518371/286865/281987/614834/507860/521790/281865/540005/515135/534029/281878/615813/530577/615077/54…
bta00030	Pentose phosphate pathway	28	0.458114	1.91882	0.00481723	0.0196116	0.0130744	356	tags=18%, list=2%, signal=18%	534402/509566/506544/514066/280808
bta04215	Apoptosis - multiple species	34	-0.42272	-1.71745	0.00489513	0.0196116	0.0130744	4870	tags=50%, list=25%, signal=37%	414925/537782/504851/281647/493999/408016/527278/534211/100140945/514090/282527/507481/523039/526279/493720/280730/510373
bta03022	Basal transcription factors	42	-0.402232	-1.7346	0.00493263	0.0196116	0.0130744	5139	tags=55%, list=27%, signal=40%	781912/516578/513231/507984/100137723/785085/514443/516001/534669/510921/515462/539938/532936/518030/513510/511896/785612/505702/536067/615512/511829/613818/100125238
bta05220	Chronic myeloid leukemia	76	-0.330524	-1.64326	0.00556386	0.021858	0.014572	7527	tags=63%, list=39%, signal=38%	281730/282152/327672/536051/282291/282307/505463/541218/531391/529631/618405/282308/537682/282089/540248/535376/511077/517948/535298/533590/533199/281542/616115/527418/616369/282382/280991/282306/535369/789892/524530/519357/281854/100137872/532209/281855/615013/514090/286865/541140/404126/507196/506322/511754/512841/508233/280730/510618
bta04145	Phagosome	158	-0.265066	-1.51847	0.00728412	0.0282795	0.018853	9343	tags=67%, list=49%, signal=35%	281766/505224/525727/282196/282493/508327/540113/538050/615087/616942/504741/281112/338092/535605/282535/538700/281877/407124/282494/513266/407173/281534/287017/537748/787578/281555/100141266/281873/317777/112443216/510417/327711/515200/281048/281311/281641/281368/282497/281530/282346/282229/506214/282530/524959/282490/512672/504244/281345/782652/281875/539241/510330/281346/507031/533307/516259/2…
bta04668	TNF signaling pathway	114	-0.292642	-1.59363	0.00820598	0.0314881	0.020992	8893	tags=66%, list=47%, signal=35%	534125/282871/508105/281735/613667/280943/281137/534492/504531/615107/281839/535622/281309/281214/282118/281043/514386/327672/541268/327712/282291/282307/531391/519958/537631/789216/407221/338033/508608/282308/523746/281094/281915/282488/531942/507427/540892/785086/517948/509827/504408/529146/533199/616115/444867/280991/282306/281713/508431/618906/408016/281854/516039/100137872/512355/540944/2817…
bta05213	Endometrial cancer	57	-0.350207	-1.63234	0.00941207	0.035701	0.0238006	7362	tags=65%, list=39%, signal=40%	327672/536051/282307/505463/541218/531391/618405/535530/282308/537682/540207/526572/511077/517948/535298/511619/282637/533199/281542/540481/280991/282306/524530/519357/407217/100137872/790875/100140945/615013/514090/286865/541140/539003/506322/526848/540786/280730
bta03440	Homologous recombination	41	-0.385258	-1.64632	0.0100369	0.0376385	0.0250923	8384	tags=76%, list=44%, signal=43%	507912/788127/527411/504844/507069/615896/534148/768244/353120/540574/519513/530961/522943/783256/100140639/507620/617899/537418/504796/526824/508607/281990/540886/100125299/529507/525093/533414/537616/789410/514749/617007
bta05132	Salmonella infection	249	-0.237872	-1.45894	0.010244	0.0379832	0.0253221	7666	tags=58%, list=40%, signal=35%	511561/514214/281020/281534/537748/282601/514386/327672/281555/537690/100141266/112443216/512480/513939/282466/537396/281048/514327/282291/514371/531391/508361/538477/519958/507215/504244/527701/537631/531907/768062/510330/533307/540381/616366/507311/282689/540619/281536/523424/538559/404053/281832/507427/534815/281165/537790/534206/338039/100141038/613533/104968444/511077/517948/511083/508874/51…
bta04024	cAMP signaling pathway	220	0.225602	1.45657	0.0107799	0.0395262	0.0263508	983	tags=10%, list=5%, signal=9%	518117/100337204/281716/530719/524624/537960/520277/515161/525416/512222/510026/521196/281553/532713/540568/510434/517688/282322/525482/511224/281371
bta03450	Non-homologous end-joining	13	-0.531942	-1.58692	0.0112281	0.0407173	0.0271448	8254	tags=92%, list=43%, signal=52%	788127/522307/281120/781252/513780/616242/510132/517886/525093/613590/531945/512740
bta05231	Choline metabolism in cancer	94	-0.296952	-1.55179	0.0129408	0.046418	0.0309454	10774	tags=76%, list=56%, signal=33%	535665/514865/511887/512311/100138102/530095/519461/520625/540674/539992/282001/107131173/513389/534125/617624/533440/327671/537654/504531/282325/100125779/508819/327672/504985/511291/282307/282002/518523/531391/527165/537631/537171/525931/282308/513723/537682/100125224/617172/505485/517948/535298/507455/514554/525072/281440/526175/100139219/617707/533199/404181/506348/504545/280991/282306/531488…

## Sheet: MYBPC2
ID	Description	setSize	enrichmentScore	NES	pvalue	p.adjust	qvalues	rank	leading_edge	core_enrichment
bta04141	Protein processing in endoplasmic reticulum	165	-0.419294	-2.43653	1e-10	5.30818e-09	3.60651e-09	3272	tags=47%, list=17%, signal=40%	497024/511649/512323/512589/100298456/511682/777788/767874/509488/514361/512355/528862/513253/513928/531964/790870/615027/613403/614471/790880/512530/514090/512276/530027/614538/511008/614959/515784/507124/509646/112442685/513829/508358/520650/513023/281373/541236/508465/781036/407129/613357/538938/535820/505089/516332/510682/506316/540155/534231/415110/504832/517171/535071/507939/539931/541040/5…
bta04142	Lysosome	134	-0.50907	-2.85931	1e-10	5.30818e-09	3.60651e-09	4866	tags=63%, list=25%, signal=48%	505097/506192/100299651/281838/281023/517031/515575/281105/404155/531411/504799/534524/616331/521189/282218/616804/509522/530164/282148/281421/616562/512078/282657/782535/536359/513684/508713/286768/404156/535407/281433/538401/505684/767602/505554/768040/509715/529148/338038/515935/281080/789125/507677/100125267/510620/509610/281291/281897/512444/327687/515729/514761/541272/541071/511050/515397/5…
bta04260	Cardiac muscle contraction	90	0.587352	3.20669	1e-10	5.30818e-09	3.60651e-09	823	tags=21%, list=4%, signal=20%	518117/327703/521616/100337204/537960/781184/785909/515161/282608/497015/497019/540307/534061/539969/510026/281544/282714/540568/519331
bta04261	Adrenergic signaling in cardiomyocytes	143	0.495215	2.96866	1e-10	5.30818e-09	3.60651e-09	898	tags=22%, list=5%, signal=21%	530719/518117/538100/327703/521616/767949/100337204/537960/781184/509107/785909/618204/520277/515161/282608/497015/100298789/497019/525416/540307/539969/512943/510026/281544/787607/532713/282714/540568/519331/282322/525482
bta05168	Herpes simplex virus 1 infection	296	-0.426759	-2.69033	1e-10	5.30818e-09	3.60651e-09	7647	tags=70%, list=40%, signal=43%	407111/281534/282152/783760/281043/514386/407173/281873/504336/100125579/510417/327712/281237/534063/504985/768054/282291/533492/786262/505521/100140999/282497/538845/282307/112441496/506214/519958/512908/100125413/512684/282530/524959/282490/444866/512672/100848207/508619/613384/539241/515674/507268/539022/282308/282491/101905074/521998/282488/101902926/614310/510814/537201/100140756/510078/2807…
bta05410	Hypertrophic cardiomyopathy	87	0.550212	2.9524	1.07303e-10	5.30818e-09	3.60651e-09	992	tags=28%, list=5%, signal=26%	518117/327703/521616/100337204/781184/785909/282608/497015/497019/511961/540307/541308/280765/539969/281544/512665/506155/517059/282714/540568/519331/535372/538954/282644
bta00510	N-Glycan biosynthesis	50	-0.607558	-2.73625	1.12598e-10	5.30818e-09	3.60651e-09	4343	tags=70%, list=23%, signal=54%	504474/526256/506537/615012/510138/615007/282073/515771/504908/539837/281781/614624/530027/614538/537812/509745/521539/534248/540845/537595/510682/540155/534231/538899/507939/504346/535834/101906103/532645/100125314/506566/523737/516155/538731/507815
bta04921	Oxytocin signaling pathway	143	0.461071	2.76397	1.70314e-10	7.02545e-09	4.77327e-09	984	tags=24%, list=5%, signal=23%	100139857/530719/327703/533378/521616/100337204/781184/785909/520277/282608/515421/538479/511961/525416/790867/512254/282321/539969/521196/512665/286852/532713/786886/521730/518025/510434/519331/282322/100298939/525482/533527/511224/538954/281371
bta04922	Glucagon signaling pathway	97	0.51633	2.82908	2.33015e-10	8.54388e-09	5.80493e-09	976	tags=25%, list=5%, signal=24%	530719/327664/100336808/512571/511783/786335/509107/540682/515067/520277/281274/511961/514066/506544/525416/790867/282321/512665/286852/532713/282322/533527/282304/538954
bta04740	Olfactory transduction	281	0.35461	2.33641	7.5305e-10	2.3987e-08	1.62974e-08	4677	tags=73%, list=24%, signal=56%	530719/520277/785036/526623/525416/540307/785068/519183/528106/786149/526621/512948/784976/783917/783210/783884/532075/509884/532713/782678/512441/282322/527077/282162/529284/784594/507721/788891/107131705/100301071/617095/615739/618593/282004/112441493/618717/508468/281970/526047/515369/526211/514553/783203/504688/786765/505481/618070/528422/516263/514342/787779/788304/523389/783598/788633/61670…
bta05414	Dilated cardiomyopathy	91	0.511175	2.76831	7.99566e-10	2.3987e-08	1.62974e-08	992	tags=25%, list=5%, signal=24%	518117/327703/521616/100337204/781184/785909/282608/497015/497019/540307/541308/280765/539969/281544/506155/517059/282714/540568/519331/535372/282322/525482/282644
bta03040	Spliceosome	140	-0.419803	-2.37077	3.34564e-09	9.2005e-08	6.25106e-08	5968	tags=60%, list=31%, signal=42%	614759/514932/504381/574400/534894/100140430/509802/534600/509425/614310/112441916/281827/112443614/528991/510529/536093/515290/613304/507828/540190/510177/526536/100299693/614922/100124428/508312/509920/767817/613634/531931/512584/507371/540258/539950/522372/520046/507895/100301114/533700/525110/528135/767873/507066/326578/507240/615198/510474/508735/509591/523250/508788/514003/534586/507738/506…
bta04020	Calcium signaling pathway	231	0.359194	2.31897	8.73359e-09	2.21699e-07	1.50628e-07	1295	tags=18%, list=7%, signal=17%	508394/100139857/530719/615428/518117/533378/100336808/100337204/540771/511783/536132/540682/520277/540317/525416/540307/534061/790867/326284/282321/618262/286852/532713/282716/540568/518025/517688/282322/338035/525482/533527/528416/281371/617610/613800/513057/281601/540485/282162/534816/282119
bta05171	Coronavirus disease - COVID-19	242	-0.339765	-2.08675	2.20635e-08	5.20069e-07	3.53348e-07	9138	tags=69%, list=48%, signal=36%	619131/404137/505647/534125/112441655/767925/534492/534961/281857/280943/535668/507339/281112/504531/509968/615107/282325/529660/280958/538639/532262/617435/112441463/615300/525408/281309/514214/788861/327672/281534/101902490/280873/281043/767908/614872/337888/507270/286868/768327/282291/100337091/540702/514569/506297/539369/404142/326602/493686/282052/504413/531391/282307/282002/515534/618702/51…
bta05160	Hepatitis C	151	-0.388592	-2.21821	3.31041e-08	7.2829e-07	4.94819e-07	5306	tags=52%, list=28%, signal=38%	282488/535321/510814/537201/511077/512975/512405/535298/519922/517948/537782/281542/347699/616115/533199/510427/282306/280991/509231/507689/100336105/535369/281276/509855/511435/533216/539124/524530/408016/281854/512484/512355/282320/100137872/100138150/407217/790875/100140945/508541/281855/615013/100048947/654488/514090/286865/282527/524361/541140/539003/282257/282258/513829/100125591/507481/506…
bta00010	Glycolysis / Gluconeogenesis	58	0.554299	2.69761	8.99669e-08	1.85557e-06	1.26072e-06	753	tags=26%, list=4%, signal=25%	534402/509566/512571/515067/540303/281181/281543/281274/514066/506544/280808/507476/788926/112447087/533785
bta05412	Arrhythmogenic right ventricular cardiomyopathy	74	0.510394	2.64564	1.28622e-07	2.49677e-06	1.69637e-06	992	tags=26%, list=5%, signal=24%	518117/327703/521616/100337204/539375/781184/785909/282608/540307/541308/280765/539969/506155/536607/517059/540568/519331/535372/282644
bta03010	Ribosome	145	-0.383869	-2.17126	1.98774e-07	3.45752e-06	2.34913e-06	7762	tags=63%, list=41%, signal=38%	768042/399560/788861/101902490/767908/614872/337888/507270/286868/768327/514569/506297/404142/326602/282052/504413/515534/618702/510547/507168/506358/540965/510615/615178/286790/513031/505603/101902561/337890/539196/101907518/504858/326582/616065/511051/515014/505507/508216/404140/100299845/514966/286873/533310/282050/506229/535056/507151/515238/286839/326584/513128/540129/286853/509426/530464/28…
bta04110	Cell cycle	123	-0.400511	-2.21337	1.99069e-07	3.45752e-06	2.34913e-06	6922	tags=63%, list=36%, signal=40%	282126/100336564/505463/510120/535072/534579/515301/618405/524925/511281/539924/112446776/282089/519018/508043/530333/281729/540248/515499/522613/540537/507731/511077/327679/515476/540547/282370/281542/616487/616369/506970/515376/533294/516010/526824/516094/506740/281668/524870/513523/281061/520428/281667/523714/515462/535369/538238/281302/540660/504367/519409/510916/524530/777693/517812/790875/5…
bta04144	Endocytosis	236	-0.333111	-2.03812	2.80592e-07	4.62977e-06	3.14559e-06	6492	tags=56%, list=34%, signal=37%	112447442/520311/518839/507672/540304/512672/534708/511223/508582/512010/533406/281861/783379/532237/506374/507199/521413/497017/516259/512489/100125224/528478/504750/523736/404193/281769/516048/524653/532685/281827/617385/100141038/515444/535376/514465/511582/525906/540190/615866/523124/789414/528153/533050/514554/535566/535742/538660/539779/531459/539295/540709/614321/508040/527418/282382/51601…
bta00531	Glycosaminoglycan degradation	20	-0.694544	-2.38142	2.98237e-07	4.68657e-06	3.18418e-06	3237	tags=75%, list=17%, signal=62%	616562/538401/789125/512444/541272/511050/515397/535442/515809/515687/511607/786974/504468/507188/618571
bta05164	Influenza A	167	-0.348534	-2.0248	1.39967e-06	2.09951e-05	1.42646e-05	8778	tags=68%, list=46%, signal=37%	538426/281250/281857/280943/504531/615107/281839/282325/529660/538639/512136/281942/280875/282535/327694/538700/282494/525408/514214/407111/327672/280873/281043/327712/281237/282291/282497/493686/531391/282307/506214/507054/520351/282530/282490/534708/507215/508619/539241/282308/282491/112446776/281536/282488/539974/281156/510814/537201/104968444/519922/517948/540547/783596/537782/347699/525246/6…
bta00513	Various types of N-glycan biosynthesis	41	-0.540239	-2.31688	1.90189e-06	2.7288e-05	1.85402e-05	4343	tags=63%, list=23%, signal=49%	504474/506184/526256/506537/615012/615007/515771/281781/614624/530027/614538/521539/534248/786974/540845/510682/504468/534231/538899/507939/504346/101906103/532645/100125314/618571/507815
bta00500	Starch and sucrose metabolism	31	0.600528	2.55708	8.65553e-06	0.000118406	8.04479e-05	1248	tags=42%, list=7%, signal=39%	327664/534402/517397/786335/280808/280812/788926/515366/539383/530330/505258/281565/505049
bta04022	cGMP-PKG signaling pathway	161	0.343927	2.10116	8.97013e-06	0.000118406	8.04479e-05	927	tags=16%, list=5%, signal=15%	518117/533378/100337204/537960/509107/520277/515161/281356/540307/790867/512254/533039/282321/100336730/510026/521196/286852/282716/282714/540568/518025/510434/525482/533527/511224
bta05212	Pancreatic cancer	75	-0.421146	-2.09659	1.19896e-05	0.000152176	0.000103392	6710	tags=67%, list=35%, signal=43%	505463/531391/282307/541218/538477/618405/537631/513723/282308/282089/540248/510814/537201/535376/517948/281440/514554/100139219/281542/616115/533199/404181/616369/282382/516010/282306/280991/523324/535369/519357/524530/281854/100137872/407217/619066/100140945/508541/532712/281855/615013/514090/286865/541140/522159/505238/511754/508233/514749/280730/510618
bta04910	Insulin signaling pathway	133	0.363248	2.14299	1.33558e-05	0.000163238	0.000110908	1179	tags=20%, list=6%, signal=19%	327664/784877/100336808/511783/786335/540682/520277/511961/514066/521196/512665/788926/520454/282359/513859/786886/100139988/539466/510434/538519/282322/100298939/538954/782160/533171/540421/518180
bta04210	Apoptosis	140	-0.347313	-1.96139	1.79948e-05	0.000212081	0.000144094	8053	tags=69%, list=42%, signal=40%	327694/100296226/535605/281020/407111/327672/282152/514386/541268/504336/369025/100141266/510967/112443216/515200/282291/327711/281350/512730/505463/531391/282307/286764/618405/507215/504244/537631/282333/282308/282488/317697/404053/516326/510524/414925/104968444/517948/537782/281542/782966/616115/533199/281105/281647/282306/526824/280991/616804/777788/507426/540643/493999/281879/408016/281854/51…
bta05162	Measles	138	-0.34953	-1.9751	1.9475e-05	0.000221612	0.000150569	5660	tags=73%, list=30%, signal=52%	538436/618508/506873/281050/281831/100296565/512613/515105/281862/781996/281489/539235/534125/508105/281250/281857/538276/504531/529660/282375/327694/281020/525408/104968644/513266/407111/281534/282152/280873/282291/493686/282307/282229/537631/281861/282308/327682/281536/282488/281827/282420/510814/537201/540426/519922/525906/517948/540547/540190/537782/281542/347699/529146/616115/282306/280991/5…
bta04621	NOD-like receptor signaling pathway	171	-0.333398	-1.94197	2.19693e-05	0.000238321	0.000161921	8004	tags=64%, list=42%, signal=38%	508105/534492/613667/280943/508029/281112/529660/538639/539780/616010/781710/281020/525408/282167/281214/508888/504400/505101/514214/327672/513924/282152/281043/514386/513939/512480/327712/768054/282291/512486/531391/338472/519958/507664/281985/507432/537631/510080/539513/506759/529195/281832/281536/519754/528166/317697/539974/507427/281111/510814/286814/507055/537201/338039/287026/511531/519513/…
bta03008	Ribosome biogenesis in eukaryotes	76	-0.418847	-2.08806	2.23877e-05	0.000238321	0.000161921	7251	tags=63%, list=38%, signal=39%	510315/112442867/530688/512048/513405/507155/618429/520351/514267/112448582/404165/768075/507410/617906/505846/360191/282420/507369/521240/540772/538548/507132/540168/511723/538915/512692/540457/782674/531274/517417/614984/510568/535163/515001/525619/532864/514336/514945/508270/513043/614870/514870/511306/505324/505600/617204/516289/515057
bta05100	Bacterial invasion of epithelial cells	75	-0.408276	-2.03252	3.24792e-05	0.000334942	0.000227568	5660	tags=59%, list=30%, signal=41%	282308/540207/506270/538559/540614/517948/281440/540085/535742/527550/533188/282637/527418/281876/282306/525427/281577/506939/326600/100140583/509821/531488/540838/281080/281597/537203/532712/504482/511612/280979/286865/539003/404122/507196/539459/614345/538486/506605/512841/506596/281078/338049/508402/526848
bta03460	Fanconi anemia pathway	51	-0.463503	-2.1036	3.65058e-05	0.000365058	0.00024803	7792	tags=76%, list=41%, signal=45%	527411/613732/507069/504844/616549/615637/534148/541218/513606/353120/522442/614063/615553/618375/527039/512193/783256/507620/523362/537418/618018/526097/515845/618860/513626/516371/540886/516328/515909/510793/100125299/100125287/510858/281762/539681/614512/504869/515662/514749
bta04062	Chemokine signaling pathway	183	-0.307152	-1.8035	3.94262e-05	0.000382667	0.000259994	8798	tags=66%, list=46%, signal=36%	533455/281735/327671/613667/538276/788151/504531/614838/530001/615107/281863/497018/282325/281797/505740/281796/534996/408019/407771/287018/525408/618470/281214/516133/282136/508888/327672/281603/281043/541008/282682/536051/282323/408018/327712/282291/100337091/529196/519716/281203/531391/282307/515621/407772/516104/281345/506807/281985/535530/521413/282308/537682/497017/512489/536517/535603/5111…
bta04720	Long-term potentiation	62	0.452785	2.23758	4.80048e-05	0.000452617	0.000307519	1242	tags=29%, list=7%, signal=27%	530719/767949/509107/520277/525416/790867/282321/521196/286852/532713/510434/282322/100298939/533527/540421/281601/540485/282162
bta04130	SNARE interactions in vesicular transport	32	-0.52608	-2.10415	6.11242e-05	0.000547984	0.000372314	5682	tags=66%, list=30%, signal=46%	507031/519624/507409/519148/780809/539960/788566/616923/513275/532261/614775/506198/780850/511030/507309/509758/614520/510909/616526/510312/613984
bta04010	MAPK signaling pathway	287	0.271413	1.79787	6.14406e-05	0.000547984	0.000372314	927	tags=13%, list=5%, signal=12%	327703/521616/100337204/781184/509107/528415/785909/282608/540317/790867/512254/286883/533039/326284/282321/528390/539969/519251/506660/512943/615432/521196/286852/507245/541175/786886/281995/788091/615727/510434/519331/538519/282322/281994/100298939/533527/511224
bta00511	Other glycan degradation	23	-0.578902	-2.07191	9.39482e-05	0.000811822	0.000551573	4162	tags=57%, list=22%, signal=44%	541086/506184/509522/505554/515729/281909/786974/282272/504468/511345/507188/537087/618571
bta01200	Carbon metabolism	107	0.372434	2.10168	9.59425e-05	0.000811822	0.000551573	688	tags=13%, list=4%, signal=13%	509566/512571/515067/540303/281181/281543/514066/506544/280808/507476/788926/286886/511090/538173
bta00600	Sphingolipid metabolism	54	-0.430569	-1.99801	0.000127221	0.00104958	0.000713109	5678	tags=57%, list=30%, signal=40%	100336736/533428/524460/617172/533103/505097/522515/617707/530776/504545/281433/505554/507207/516881/510620/282407/539223/540732/537972/509018/532742/786974/614165/507290/505514/504468/505558/507188/537087/618571/100336737
bta03410	Base excision repair	33	-0.510339	-2.05005	0.000145106	0.00116793	0.000793522	5351	tags=73%, list=28%, signal=52%	444987/513458/515499/616242/518653/617899/515343/281630/513051/282691/507426/281990/517825/785457/615359/520497/618306/537616/505828/613730/100124507/616905/535203/511790
bta00970	Aminoacyl-tRNA biosynthesis	44	-0.461349	-2.02585	0.00017574	0.00138081	0.000938161	6052	tags=64%, list=32%, signal=44%	504609/286855/518874/504824/525350/506305/525894/532903/509429/538772/281476/538357/509624/510075/282060/512531/281576/511740/100847824/615182/100300732/514586/281581/510937/514726/616033/536956/508907
bta03060	Protein export	23	-0.556285	-1.99096	0.000199823	0.00153353	0.00104192	3990	tags=57%, list=21%, signal=45%	281504/514960/767917/614017/504842/538938/509430/541040/786732/506986/415113/282078/505064
bta04520	Adherens junction	70	-0.394461	-1.93288	0.00021914	0.00164355	0.00111667	10393	tags=84%, list=54%, signal=39%	540674/280977/505709/505696/536092/539359/281848/515125/782690/107131173/539235/407102/505453/327671/515303/520631/504492/327672/408017/508150/533492/514637/531391/512312/112446776/527263/540248/508658/534360/282420/535376/536759/281440/535742/529146/282637/540481/282382/515187/281577/524770/512072/507837/531488/504856/407217/619066/507632/532712/504482/507204/104968536/505580/280979/539003/40412…
bta05203	Viral carcinogenesis	191	-0.299182	-1.77199	0.000237745	0.00174347	0.00118456	4637	tags=45%, list=24%, signal=34%	785086/535298/513231/509827/517948/540547/281440/404125/533050/100137723/535742/281542/616115/510654/533491/616369/515376/533294/282306/510921/524870/281713/281061/281667/524770/282148/506402/509855/524530/408016/512355/509006/528135/533202/540944/326578/281715/513928/508541/513510/532712/522155/281855/517837/615013/511896/514090/615414/286865/785612/541140/514420/404126/100125591/507481/540666/2…
bta05161	Hepatitis B	159	-0.305904	-1.75983	0.000253494	0.00181855	0.00123557	5660	tags=48%, list=30%, signal=34%	282308/537682/112446776/281536/282089/282488/540248/515499/510814/537201/414925/535376/511077/785086/535298/509827/517948/537782/535742/281542/525246/529146/616115/533199/510427/282382/282306/280991/281713/281667/618906/535369/533216/516039/539124/519357/408016/281854/512484/100137872/281715/513928/100140945/788119/508541/535490/281855/615013/286865/327687/541140/282257/353105/100125591/539350/50…
bta05169	Epstein-Barr virus infection	210	-0.280704	-1.69437	0.000312757	0.00219595	0.00149199	8821	tags=59%, list=46%, signal=32%	508105/534492/616942/280943/538276/533459/506087/281874/504531/280955/615107/407126/281839/529660/514813/534996/282535/538700/617024/281020/282494/525408/281534/281057/534057/407173/510417/282291/100337091/282497/505463/282307/541218/506214/519958/282530/524959/282490/512672/618405/781150/537631/539241/282308/282491/510393/533462/519018/286849/282488/510814/537201/767928/511077/280729/783680/5199…
bta03030	DNA replication	35	-0.485545	-1.99575	0.000320997	0.00220685	0.00149939	7833	tags=77%, list=41%, signal=46%	613354/504844/515602/510120/539924/512830/515499/508389/616242/504637/518653/617899/506970/514842/281302/504367/534848/281990/514682/517812/785457/540969/537616/514793/613730/100124507/506240
bta05145	Toxoplasmosis	111	-0.331776	-1.79525	0.000396506	0.00267035	0.0018143	10195	tags=79%, list=53%, signal=37%	511043/282498/100336873/529670/282495/281831/518914/508720/781996/525727/282493/404074/534125/518795/534492/281857/280943/614838/530001/112445051/520030/282535/538700/513478/281020/282494/525408/506387/327672/281534/282152/514386/282876/281237/282291/535043/282497/531391/529939/515621/282387/506214/519958/282530/282490/414346/508619/537631/539241/497017/282491/281536/282089/286849/530599/281827/5…
bta01230	Biosynthesis of amino acids	70	0.392656	2.01431	0.000506229	0.0033271	0.00226052	645	tags=13%, list=3%, signal=12%	509566/512571/515067/540303/281181/281543/506544/507476/286886
bta04622	RIG-I-like receptor signaling pathway	74	-0.375892	-1.8701	0.000523169	0.0033271	0.00226052	4121	tags=41%, list=22%, signal=32%	529146/616115/536421/767903/519541/618906/510923/506848/533216/539124/281854/512355/535490/281855/539145/100125591/532686/507481/508378/506182/533141/504760/504727/504707/508233/523962/281871/516979/767932/493720
bta04071	Sphingolipid signaling pathway	117	-0.327423	-1.79712	0.000524271	0.0033271	0.00226052	6733	tags=60%, list=35%, signal=39%	533538/531391/282307/540305/282002/616901/538896/281985/537631/100336736/282308/287024/535321/527263/533103/505097/287026/517948/522515/281440/514554/507041/281542/616115/533199/530776/282306/281791/280991/618906/539123/533147/536654/512355/282320/281790/505611/100137872/100138150/619066/100134966/533788/516881/506783/510620/515159/539223/540732/286865/282527/517533/524361/541140/537972/509018/28…
bta03420	Nucleotide excision repair	44	-0.43792	-1.92297	0.000575231	0.00358163	0.00243345	5172	tags=64%, list=27%, signal=47%	515499/508389/522908/507984/504637/100137723/518653/617899/514842/515462/509602/519357/537958/281990/516371/513510/511896/785457/615512/539668/537616/524274/511951/511829/613730/100124507/508601/100125238
bta04925	Aldosterone synthesis and secretion	92	0.355309	1.93208	0.0005982	0.00365567	0.00248376	1242	tags=18%, list=7%, signal=17%	530719/100337204/537960/509107/520277/515161/525416/528390/510026/532713/540245/517688/282322/525482/613800/281601/282162
bta05222	Small cell lung cancer	91	-0.3427	-1.78562	0.000636873	0.00382124	0.00259625	11063	tags=82%, list=58%, signal=35%	281872/504943/508490/281073/534712/512915/541184/692183/511043/513497/515011/100336873/529670/317711/538436/518914/512613/781996/781568/527124/504531/280794/520030/617024/281020/506387/282152/514386/282876/511602/282291/535043/505463/282307/541218/529939/618405/281875/282308/519018/506270/530599/511077/517948/537782/281542/616115/281647/281876/282306/280991/535369/767985/616895/539124/519357/5235…
bta04911	Insulin secretion	82	0.365036	1.93435	0.000741425	0.00436911	0.00296849	1242	tags=18%, list=7%, signal=17%	530719/100337204/537960/509107/515161/532060/525416/510026/532713/534180/282322/525482/281601/408008/282162
bta03015	mRNA surveillance pathway	87	-0.347955	-1.79305	0.000825529	0.00477938	0.00324723	6590	tags=59%, list=35%, signal=39%	510604/540982/280796/520351/504925/537131/327689/616181/525143/100296970/534600/535321/516411/787259/783336/282703/783569/529071/504506/516175/100124428/532933/541270/528728/533147/282298/511408/282320/100138150/768231/100134966/533788/508491/101908085/506507/281712/505417/524361/518859/784123/513043/282588/505757/515145/338051/511555/282296/538724/510872/541013/507051
bta04971	Gastric acid secretion	71	0.383054	1.97648	0.000899935	0.00512032	0.00347888	898	tags=17%, list=5%, signal=16%	530719/533378/537960/520277/515161/525416/510026/532713/518025/280800/282322/525482
bta04080	Neuroactive ligand-receptor interaction	322	0.234932	1.58816	0.00100033	0.00559507	0.00380143	1078	tags=8%, list=6%, signal=8%	281716/539128/338070/613317/790333/282179/281963/507053/112441549/540519/112444892/281688/280728/618262/281191/281687/524064/528699/281553/281689/532277/338035/530065/528416/281371/509493/282237
bta01524	Platinum drug resistance	74	-0.366603	-1.82389	0.001079	0.00593448	0.00403204	11012	tags=82%, list=58%, signal=35%	540378/507346/100138102/782359/520925/505709/513497/518075/785216/281805/521685/781996/777644/616744/533652/504531/100296226/516190/533115/281020/407111/327672/506093/282152/514386/615552/615637/531391/282307/517724/513606/353120/282308/540526/541275/282488/414925/787696/517948/537782/281542/281647/616369/518976/282306/526824/280991/408016/537958/100137872/493719/100140945/615013/282097/514090/28…
bta05163	Human cytomegalovirus infection	221	-0.26372	-1.60338	0.00120597	0.00643421	0.00437157	5660	tags=47%, list=30%, signal=34%	282308/537682/515640/497017/535603/506270/282488/317697/513340/511812/507359/537201/511077/287026/280729/783680/533661/785086/535298/509827/517948/281788/100297344/281440/513377/533050/100139219/535742/281542/527550/616115/533199/404181/616369/282642/282306/281791/280991/281713/525962/613811/618906/535369/326597/504288/286850/536654/281879/509936/524530/408016/540741/281854/512355/509006/281790/7…
bta05135	Yersinia infection	141	-0.300223	-1.69937	0.00122285	0.00643421	0.00437157	7447	tags=58%, list=39%, signal=36%	281043/541008/530401/281873/508819/535225/512480/282291/616969/535347/508361/531391/282307/519958/540304/524352/537631/282308/529195/100125224/281536/519754/506270/538559/526227/516048/517948/281440/513377/533908/535742/527550/529146/616115/533199/282846/510427/281876/282306/280991/281577/616545/618906/326600/536654/507837/516039/539124/281854/509821/512355/100137872/619066/540838/616849/790875/2…
bta04115	p53 signaling pathway	76	-0.364134	-1.8153	0.00122835	0.00643421	0.00437157	5421	tags=50%, list=28%, signal=36%	614920/515914/282488/508167/104968444/327679/540547/519896/538512/537782/281542/616369/617931/526824/281668/281061/509863/282261/519357/524530/408016/616861/100140945/615414/507481/100137737/518897/532527/519217/784541/507901/504869/508875/511754/540786/280730/510618/510373
bta00051	Fructose and mannose metabolism	33	0.475571	2.04475	0.00127341	0.00656603	0.00446113	523	tags=21%, list=3%, signal=21%	509566/534928/281543/514066/506544/407183/788926
bta04612	Antigen processing and presentation	78	-0.352927	-1.77579	0.00130296	0.00661505	0.00449444	10153	tags=78%, list=53%, signal=37%	100300510/282498/493736/282495/281831/513869/514897/100296565/508720/525727/282493/407098/444877/616942/280943/282535/538700/536558/282494/407173/510417/281237/515200/327711/282497/506214/282530/524959/282490/539884/512672/613384/281281/100139049/539241/615930/282491/281832/281827/280729/783680/540190/509857/533050/282860/281105/100336105/281713/100125917/767874/509006/504335/540760/281586/618733…
bta05031	Amphetamine addiction	64	0.382652	1.89916	0.00142725	0.00713627	0.00484857	911	tags=16%, list=5%, signal=15%	530719/509107/520277/525416/790867/282321/286852/532713/282322/533527
bta01521	EGFR tyrosine kinase inhibitor resistance	78	-0.350659	-1.76438	0.0015333	0.00750453	0.00509877	6658	tags=59%, list=35%, signal=39%	281361/531391/282307/282002/527165/504526/535530/516598/282308/537682/525931/281161/404193/281769/507359/537201/535298/517948/100139219/540085/535742/525246/533199/404181/787914/282306/280991/519920/407170/100137872/407217/790875/508541/615013/613787/286865/281987/541140/785655/507196/280877/506322/282879/540786/280730/614570
bta05165	Human papillomavirus infection	316	-0.243453	-1.54696	0.00154639	0.00750453	0.00509877	7647	tags=53%, list=40%, signal=33%	407111/327672/536993/514561/287017/280873/505242/407173/281873/282323/510417/511602/538609/504985/281641/514031/789485/445418/617638/781865/535043/518884/445419/531391/282307/529939/527165/281530/506995/538536/512672/505267/785423/540664/445420/789216/281875/508008/282308/537682/112446776/515680/539203/528478/516433/787466/506270/526572/282488/535321/506618/530599/524653/100336926/516578/510814/5…
bta05210	Colorectal cancer	87	-0.33762	-1.73979	0.00171317	0.00819341	0.00556681	10117	tags=77%, list=53%, signal=36%	513497/533233/538751/537176/515125/782690/781996/616744/534125/507390/533652/327671/504531/515303/100295476/100296226/533115/281020/327672/536051/505463/531391/282307/541218/538477/618405/537631/513723/282308/540526/537682/282089/526572/540248/414925/535376/511077/535298/517948/511619/281440/100139219/281542/533199/404181/540481/282382/516010/282306/280991/519357/524530/408016/100137872/407217/61…
bta00563	Glycosylphosphatidylinositol (GPI)-anchor biosynthesis	25	-0.508912	-1.87386	0.0017837	0.00840889	0.00571322	5477	tags=68%, list=29%, signal=49%	768015/513395/504677/519213/100139601/504583/783989/511496/507080/525095/508700/509680/504724/768052/535138/523737/506830
bta05170	Human immunodeficiency virus 1 infection	212	-0.25809	-1.55738	0.00270665	0.0125802	0.00854732	9154	tags=67%, list=48%, signal=35%	540642/407098/618737/534125/513678/534526/539742/534492/327671/616942/280943/539277/100301478/504531/515766/524683/282325/281797/281796/287018/281020/618470/407111/507162/327672/281534/282152/539224/541008/407173/530401/535225/510417/282291/100337091/281203/534072/531391/282307/282002/519958/524959/512672/537631/338033/616948/282308/497017/504310/281536/506270/282488/317697/513340/511812/507731/2…
bta03013	Nucleocytoplasmic transport	103	-0.322298	-1.71731	0.00288481	0.0132221	0.00898341	6571	tags=57%, list=34%, signal=38%	507478/540982/538236/511248/520351/513270/510250/518768/616181/616114/506836/504716/510004/100296970/534600/520924/787259/506561/510540/614879/767620/100124498/783596/504506/100124428/523408/515573/100337114/532933/100125940/286807/504823/540457/614694/507738/510568/512530/112446383/505417/504307/784219/100299503/504786/529231/524528/535264/100139154/510797/784123/540111/513043/513080/513592/5151…
bta04912	GnRH signaling pathway	86	0.333095	1.77936	0.00304215	0.0136225	0.00925549	1242	tags=21%, list=7%, signal=20%	530719/100337204/509107/520277/525416/286883/512943/521196/532713/786886/510434/282322/100298939/525482/281601/522921/511779/282162
bta04140	Autophagy - animal	142	-0.285035	-1.61705	0.00305475	0.0136225	0.00925549	4245	tags=39%, list=22%, signal=31%	100139219/529146/533199/404181/281105/505708/540873/529808/767903/514596/507340/512685/282306/280991/282691/534126/508631/517263/787967/539124/282320/534155/100137872/527278/529148/617367/514547/615013/508354/506754/281897/782743/286865/524361/541140/112442685/532261/768316/509970/513829/514919/532686/282883/508571/281814/506322/533141/509084/535820/507309/497199/531455/540786/539339/100125881/53…
bta04066	HIF-1 signaling pathway	105	0.308631	1.74085	0.00335788	0.0147747	0.0100383	824	tags=12%, list=4%, signal=12%	530719/509566/540303/281181/281274/506544/525416/507476/407183/788926/532713/510434/538519
bta04064	NF-kappa B signaling pathway	106	-0.30777	-1.64843	0.00395818	0.0171868	0.0116772	9735	tags=72%, list=51%, signal=35%	281212/514978/100296565/515515/523360/282151/539235/508105/613667/280943/533459/281839/282325/112445051/534996/281020/282118/535188/281214/281408/282152/514386/282291/100337091/530884/281048/505521/505463/515377/282387/519958/286764/618405/613947/504994/515640/510393/281536/511112/286849/504507/282420/509167/529146/616115/536421/510427/281647/515573/526824/613811/510923/613753/539124/534722/28185…
bta03022	Basal transcription factors	42	-0.400954	-1.7334	0.00461558	0.0195274	0.0132674	5244	tags=55%, list=27%, signal=40%	781912/516578/513231/507984/100137723/785085/514443/516001/534669/510921/515462/532936/539938/518030/513510/511896/785612/505702/536067/615512/511829/613818/100125238
bta03250	Viral life cycle - HIV-1	61	-0.354451	-1.6925	0.00461558	0.0195274	0.0132674	9335	tags=72%, list=49%, signal=37%	281374/407098/618737/782605/785768/505453/506578/524683/507162/280873/789389/510596/282011/513270/504925/519808/533406/616948/407194/497017/112446776/100298356/511751/511582/108771180/504458/527829/541306/520580/521089/540457/768231/512799/616425/112441507/510568/514420/504658/540158/613647/539357/281418/280872/511861
bta04215	Apoptosis - multiple species	34	-0.425312	-1.73416	0.00475029	0.019843	0.0134818	4237	tags=47%, list=22%, signal=37%	537782/504851/281647/493999/408016/527278/534211/100140945/514090/282527/507481/523039/526279/280730/493720/510373
bta00030	Pentose phosphate pathway	28	0.465039	1.92493	0.00505975	0.0208715	0.0141806	351	tags=18%, list=2%, signal=18%	534402/509566/514066/506544/280808
bta05167	Kaposi sarcoma-associated herpesvirus infection	192	-0.256987	-1.52345	0.00558553	0.0227559	0.0154609	5660	tags=45%, list=30%, signal=32%	282308/497017/112446776/281161/282488/317697/513340/511812/510814/534815/537201/511077/533051/527410/517948/100297344/281440/533050/286839/100139219/535742/281542/525246/616115/533199/510427/540481/282306/280991/281713/525962/618906/535369/326597/286850/509855/281879/533216/524530/408016/281854/512484/512355/509006/100137872/527278/613930/790875/100140945/788119/508541/522155/281855/514547/112443…
bta04613	Neutrophil extracellular trap formation	174	-0.262284	-1.52646	0.00587659	0.0236497	0.0160682	8536	tags=56%, list=45%, signal=31%	281874/281112/504531/508161/282325/787581/504242/280958/532262/615091/538911/617434/281877/615043/616776/616868/787465/104968456/104975676/407124/282167/508888/514214/522719/327672/281534/517559/522960/513939/505183/100337091/493686/531391/787269/282307/282002/414346/524808/281345/613618/281985/281346/282308/281536/104975683/281111/614974/493645/338039/287026/517948/781224/281440/404125/100139219…
bta04070	Phosphatidylinositol signaling system	93	-0.302065	-1.58159	0.00760545	0.0302385	0.0205448	7322	tags=62%, list=38%, signal=39%	508819/537396/100337091/511124/780855/282307/282002/518523/534051/537171/281985/282308/100125224/535487/317697/540877/506349/534815/287026/537790/282087/518435/517948/100297344/100336936/790873/518488/536810/506348/282309/514596/532797/282306/539889/534793/326597/281879/538147/508236/538291/782743/615135/286865/518371/281987/507860/614834/521790/281865/540005/515135/534029/281878/530577/615813/61…
bta05213	Endometrial cancer	57	-0.3499	-1.64086	0.00901759	0.0353207	0.0239978	6710	tags=61%, list=35%, signal=40%	505463/531391/282307/541218/618405/535530/282308/537682/540207/526572/511077/535298/517948/511619/281542/533199/282637/540481/282306/280991/519357/524530/100137872/407217/790875/100140945/615013/514090/286865/541140/539003/506322/540786/526848/280730
bta04145	Phagosome	158	-0.261413	-1.50673	0.00909775	0.0353207	0.0239978	8061	tags=68%, list=42%, signal=40%	615778/338059/281766/525727/282196/282493/505224/540113/508327/538050/616942/615087/281112/504741/338092/282535/538700/535605/281877/282494/407124/513266/537748/281534/287017/407173/787578/281555/281873/317777/510417/100141266/112443216/515200/327711/281641/281048/281311/282497/281368/282346/506214/282229/281530/282530/524959/282490/512672/281345/504244/782652/539241/281875/510330/281346/507031/5…
bta04024	cAMP signaling pathway	220	0.232044	1.48426	0.0100524	0.0385732	0.0262076	984	tags=10%, list=5%, signal=9%	530719/524624/518117/281716/100337204/537960/520277/515161/525416/512222/510026/521196/281553/532713/540568/510434/517688/282322/525482/511224/281371
bta04668	TNF signaling pathway	114	-0.286346	-1.563	0.0105002	0.0398284	0.0270604	8857	tags=65%, list=46%, signal=35%	282871/508105/534492/281735/613667/280943/281137/504531/615107/281839/535622/282118/281309/281214/327672/281043/514386/541268/327712/282291/531391/282307/519958/407221/789216/537631/338033/508608/523746/282308/281094/282488/531942/281915/507427/540892/785086/504408/509827/517948/529146/616115/533199/444867/282306/280991/508431/281713/618906/516039/408016/281854/512355/540944/100137872/281715/5139…
bta04152	AMPK signaling pathway	120	0.268307	1.55618	0.0109754	0.0411579	0.0279638	1130	tags=13%, list=6%, signal=13%	786335/534928/100298789/511961/514066/506544/407183/514859/512665/282359/787607/521730/282304/538954/506029/100337329
bta05220	Chronic myeloid leukemia	76	-0.321777	-1.60414	0.0117582	0.0435977	0.0296214	7895	tags=64%, list=41%, signal=38%	617024/281730/327672/282152/536051/282291/505463/531391/282307/541218/529631/618405/282308/537682/282089/540248/535376/511077/535298/517948/533590/281542/616115/533199/527418/616369/282382/282306/280991/535369/519357/524530/281854/789892/100137872/532209/281855/615013/514090/286865/541140/404126/507196/506322/511754/512841/508233/280730/510618
bta05132	Salmonella infection	249	-0.233036	-1.43522	0.0133929	0.0491072	0.0333647	6176	tags=48%, list=32%, signal=33%	531907/507215/527701/504244/537631/510330/540381/768062/533307/540619/523424/507311/281832/282689/281536/616366/538559/507427/404053/534206/534815/100141038/338039/281165/511077/537790/613533/104968444/518781/517948/511083/281440/407237/508874/782966/529146/616115/533199/505568/282846/540481/280950/506218/282306/280991/519789/100295973/281577/618906/538366/326600/767874/613753/783375/404151/51603…

## Sheet: RYR1
ID	Description	setSize	enrichmentScore	NES	pvalue	p.adjust	qvalues	rank	leading_edge	core_enrichment
bta00510	N-Glycan biosynthesis	50	-0.610315	-2.75171	1e-10	4.125e-09	2.80263e-09	3937	tags=70%, list=21%, signal=56%	504474/510138/526256/615012/282073/506537/515771/615007/504908/539837/281781/614624/530027/521539/537812/614538/509745/534248/540845/510682/537595/540155/534231/538899/504346/507939/101906103/535834/532645/100125314/506566/516155/523737/538731/507815
bta04141	Protein processing in endoplasmic reticulum	165	-0.419944	-2.44342	1e-10	4.125e-09	2.80263e-09	4396	tags=53%, list=23%, signal=41%	540190/404121/282392/504474/533949/504438/529312/615012/507689/615007/777788/511649/497024/512589/514361/511682/767874/512323/100298456/509488/512355/528862/513928/513253/615027/531964/613403/790870/614471/790880/530027/511008/514090/614959/112442685/512276/512530/515784/614538/507124/508358/513829/509646/520650/513023/541236/281373/781036/508465/535820/407129/505089/613357/516332/538938/510682/5…
bta04142	Lysosome	134	-0.517615	-2.91643	1e-10	4.125e-09	2.80263e-09	4715	tags=63%, list=25%, signal=48%	505097/100299651/506192/281838/517031/281023/281105/515575/531411/504799/282218/404155/534524/616804/616331/521189/281421/512078/530164/616562/509522/282148/513684/282657/535407/508713/536359/782535/281433/286768/404156/767602/538401/338038/505554/768040/505684/529148/515935/509715/100125267/509610/281080/507677/789125/510620/281291/512444/281897/327687/541071/515729/514761/511050/535442/541272/2…
bta04260	Cardiac muscle contraction	90	0.586088	3.1803	1e-10	4.125e-09	2.80263e-09	828	tags=21%, list=4%, signal=20%	521616/518117/327703/537960/100337204/781184/785909/282608/515161/497015/497019/540307/534061/539969/510026/281544/282714/540568/519331
bta04261	Adrenergic signaling in cardiomyocytes	143	0.496622	2.97561	1e-10	4.125e-09	2.80263e-09	888	tags=22%, list=5%, signal=21%	530719/521616/538100/518117/327703/767949/537960/100337204/781184/509107/785909/618204/520277/282608/515161/497015/100298789/497019/525416/540307/539969/512943/510026/281544/787607/532713/282714/540568/519331/282322/525482
bta04921	Oxytocin signaling pathway	143	0.462361	2.77033	1e-10	4.125e-09	2.80263e-09	990	tags=24%, list=5%, signal=23%	100139857/530719/521616/327703/533378/100337204/781184/785909/520277/515421/282608/538479/511961/525416/790867/512254/282321/539969/521196/512665/286852/532713/786886/521730/510434/518025/519331/282322/525482/100298939/533527/511224/538954/281371
bta05168	Herpes simplex virus 1 infection	296	-0.421391	-2.66258	1e-10	4.125e-09	2.80263e-09	7550	tags=69%, list=40%, signal=42%	510417/504336/327712/282152/768054/783760/407173/100125579/281237/282291/281873/505521/533492/504985/506214/534063/786262/282530/282307/282497/282490/524959/100140999/512908/512684/512672/538845/112441496/519958/613384/508619/444866/100125413/539241/515674/100848207/507268/282491/539022/521998/101905074/282308/282488/510814/614310/537201/101902926/100124511/280729/783680/100140756/510078/10029835…
bta05410	Hypertrophic cardiomyopathy	87	0.551337	2.95267	1e-10	4.125e-09	2.80263e-09	984	tags=28%, list=5%, signal=26%	521616/518117/327703/100337204/781184/785909/282608/497015/497019/511961/540307/541308/280765/539969/281544/512665/506155/517059/282714/540568/519331/535372/538954/282644
bta04922	Glucagon signaling pathway	97	0.518461	2.83303	1.70851e-10	6.26455e-09	4.25629e-09	976	tags=25%, list=5%, signal=24%	530719/327664/100336808/512571/511783/786335/509107/540682/515067/520277/281274/514066/511961/506544/525416/790867/282321/512665/286852/532713/282322/533527/282304/538954
bta03040	Spliceosome	140	-0.426706	-2.41923	2.98115e-10	9.8378e-09	6.68406e-09	5975	tags=61%, list=31%, signal=42%	513577/614759/504381/514932/534894/574400/100140430/534600/509802/614310/509425/112443614/112441916/281827/528991/510529/536093/515290/507828/613304/510177/540190/100299693/614922/526536/100124428/508312/767817/531931/613634/512584/509920/507371/540258/539950/533700/100301114/520046/507895/522372/525110/528135/507066/326578/507240/615198/767873/510474/508735/509591/523250/514003/534586/508788/507…
bta04740	Olfactory transduction	281	0.356284	2.34114	4.01758e-10	1.20527e-08	8.18894e-09	4758	tags=74%, list=25%, signal=56%	530719/520277/785036/526623/525416/540307/519183/528106/786149/526621/512948/785068/784976/783917/783210/783884/532075/509884/532713/782678/512441/282322/527077/282162/507721/788891/107131705/100301071/529284/784594/617095/615739/618593/282004/618717/112441493/508468/281970/526047/515369/618070/528422/516263/783598/788633/616705/532403/107131345/514553/783203/504688/786765/505481/514342/787779/78…
bta05414	Dilated cardiomyopathy	91	0.512714	2.76986	1.12196e-09	3.08539e-08	2.0963e-08	984	tags=25%, list=5%, signal=24%	521616/518117/327703/100337204/781184/785909/282608/497015/497019/540307/541308/280765/539969/281544/506155/517059/282714/540568/519331/535372/282322/525482/282644
bta05171	Coronavirus disease - COVID-19	242	-0.339244	-2.09112	1.53057e-08	3.8853e-07	2.63977e-07	9269	tags=69%, list=49%, signal=36%	509484/282001/534961/101906221/280943/281857/619131/534125/404137/504531/281112/509968/282325/767925/529660/534492/112441655/615107/532262/617435/507339/538639/535668/514214/280958/112441463/281534/281043/280873/525408/615300/281309/327672/100337091/788861/540702/614872/101902490/282291/767908/493686/507270/337888/768327/286868/514569/539369/282307/506297/326602/282002/282052/404142/504413/531391…
bta04020	Calcium signaling pathway	231	0.360491	2.32459	1.98008e-08	4.66733e-07	3.1711e-07	1265	tags=17%, list=7%, signal=16%	100139857/508394/530719/615428/100336808/518117/533378/100337204/540771/511783/536132/540682/520277/540317/525416/540307/534061/790867/282321/326284/618262/286852/532713/282716/540568/518025/517688/282322/525482/338035/533527/528416/281371/617610/613800/513057/540485/281601/282162/534816
bta05160	Hepatitis C	151	-0.390612	-2.23617	3.61558e-08	7.95427e-07	5.40434e-07	5412	tags=52%, list=28%, signal=38%	282308/282488/510814/537201/511077/535321/535298/519922/537782/512975/281542/512405/517948/616115/347699/533199/510427/282306/509231/507689/280991/100336105/281276/535369/509855/408016/533216/512484/281854/512355/511435/100138150/524530/539124/100140945/282320/100137872/790875/407217/508541/100048947/281855/615013/286865/514090/654488/541140/282258/282527/282257/524361/513829/100125591/539003/507…
bta03010	Ribosome	145	-0.392141	-2.2225	7.63454e-08	1.57462e-06	1.06984e-06	7674	tags=63%, list=40%, signal=38%	615300/768042/788861/614872/101902490/399560/767908/507270/337888/768327/286868/514569/506297/326602/282052/404142/504413/515534/510547/618702/507168/540965/615178/510615/506358/286790/513031/505603/101902561/539196/101907518/337890/326582/616065/504858/511051/505507/404140/100299845/515014/508216/514966/533310/286873/507151/535056/506229/282050/515238/286839/540129/513128/326584/530464/286884/28…
bta00010	Glycolysis / Gluconeogenesis	58	0.554844	2.68994	1.01163e-07	1.85555e-06	1.26071e-06	755	tags=26%, list=4%, signal=25%	534402/509566/512571/515067/540303/281181/281543/281274/514066/506544/280808/507476/788926/112447087/533785
bta05412	Arrhythmogenic right ventricular cardiomyopathy	74	0.511533	2.63768	1.01212e-07	1.85555e-06	1.26071e-06	984	tags=26%, list=5%, signal=24%	521616/518117/327703/539375/100337204/781184/785909/282608/540307/541308/280765/539969/506155/536607/517059/540568/519331/535372/282644
bta04110	Cell cycle	123	-0.407225	-2.25447	1.82429e-07	3.1685e-06	2.15276e-06	6782	tags=63%, list=36%, signal=41%	510120/100336564/535072/282126/505463/515301/534579/618405/524925/511281/539924/112446776/282089/281729/508043/519018/530333/515499/540248/540537/507731/522613/511077/515476/327679/540547/281542/282370/616487/616369/533294/516094/515376/506970/526824/524870/516010/281668/506740/281667/513523/520428/281061/523714/538238/281302/515462/540660/504367/535369/510916/519409/524530/517812/777693/537027/7…
bta00513	Various types of N-glycan biosynthesis	41	-0.543185	-2.33069	4.48879e-07	7.4065e-06	5.03217e-06	4308	tags=63%, list=23%, signal=49%	504474/506184/526256/615012/506537/515771/615007/281781/614624/530027/521539/614538/534248/786974/540845/510682/534231/504468/538899/504346/507939/101906103/532645/100125314/618571/507815
bta04144	Endocytosis	236	-0.327601	-2.01073	5.88433e-07	9.24681e-06	6.28252e-06	6664	tags=56%, list=35%, signal=37%	540304/512672/505628/520311/507672/508582/112447442/511223/518839/281861/512010/532237/521413/534708/783379/533406/497017/512489/506374/100125224/516259/516048/523736/507199/504750/532685/100141038/528478/524653/404193/514465/617385/281769/281827/515444/525906/535376/511582/533050/540190/528153/523124/527418/540709/789414/535566/539779/535742/508040/615866/539295/514554/531459/614321/282382/53866…
bta00531	Glycosaminoglycan degradation	20	-0.691518	-2.36876	6.38831e-07	9.58246e-06	6.51057e-06	3297	tags=75%, list=17%, signal=62%	616562/538401/789125/512444/511050/535442/541272/515397/515809/511607/515687/786974/504468/507188/618571
bta05164	Influenza A	167	-0.336772	-1.96046	4.04891e-06	5.8093e-05	3.94699e-05	9462	tags=73%, list=50%, signal=37%	511037/525727/282493/282479/540004/532723/781996/282001/505453/280943/281857/504531/282325/281250/529660/615107/538426/281839/512136/538639/538700/282535/281942/282494/280875/514214/407111/327694/281043/280873/525408/327672/327712/281237/282291/493686/506214/282530/282307/282497/282490/531391/507054/508619/520351/539241/507215/534708/282491/112446776/281536/282308/282488/510814/537201/281156/5399…
bta05162	Measles	138	-0.362329	-2.04927	4.62971e-06	6.36586e-05	4.32513e-05	5473	tags=48%, list=29%, signal=34%	281536/327682/282308/282488/510814/537201/540426/281827/282420/519922/525906/540547/537782/281542/517948/540190/616115/347699/529146/282306/507689/280991/509855/408016/533216/512484/281854/524530/539124/100140945/100137872/535490/280851/790875/508541/281855/615013/286865/514090/654488/615414/282258/282257/513829/100125591/505134/507481/511776/506182/533141/504760/535820/519217/444881/504707/51175…
bta00500	Starch and sucrose metabolism	31	0.600051	2.54658	9.89918e-06	0.000130669	8.878e-05	1254	tags=42%, list=7%, signal=39%	327664/534402/517397/786335/280808/280812/788926/515366/539383/530330/505258/281565/505049
bta04022	cGMP-PKG signaling pathway	161	0.345156	2.10088	1.23495e-05	0.000156743	0.000106495	921	tags=16%, list=5%, signal=15%	518117/533378/537960/100337204/509107/520277/515161/281356/540307/790867/512254/533039/282321/100336730/510026/521196/286852/282716/282714/540568/510434/518025/525482/533527/511224
bta05212	Pancreatic cancer	75	-0.418724	-2.08547	1.76222e-05	0.000215383	0.000146337	6774	tags=67%, list=35%, signal=43%	541218/282307/505463/531391/618405/538477/513723/537631/282089/282308/540248/510814/537201/535376/281542/517948/616115/281440/100139219/404181/616369/514554/533199/282382/282306/516010/523324/280991/535369/519357/281854/524530/100140945/100137872/619066/532712/407217/508541/281855/615013/286865/514090/541140/522159/505238/511754/508233/514749/280730/510618
bta05100	Bacterial invasion of epithelial cells	75	-0.416556	-2.07467	2.07879e-05	0.000245	0.000166459	4506	tags=53%, list=24%, signal=41%	540614/517948/533188/281440/527418/535742/540085/527550/281876/282637/282306/326600/281577/525427/100140583/509821/506939/531488/540838/281597/532712/281080/504482/537203/511612/280979/286865/404122/539003/507196/614345/539459/538486/506605/506596/512841/281078/338049/526848/508402
bta04210	Apoptosis	140	-0.341583	-1.93662	2.44231e-05	0.000273372	0.000185736	8267	tags=70%, list=43%, signal=40%	100296226/281662/281020/407111/327694/514386/535605/369025/504336/327672/510967/327711/282152/281350/512730/282291/515200/541268/100141266/112443216/282307/286764/505463/531391/618405/507215/504244/537631/282333/282308/282488/317697/510524/516326/404053/414925/104968444/537782/281542/517948/616115/281105/281647/782966/533199/526824/282306/616804/280991/777788/540643/281879/507426/408016/493999/28…
bta03008	Ribosome biogenesis in eukaryotes	76	-0.418588	-2.08756	2.4852e-05	0.000273372	0.000185736	7288	tags=63%, list=38%, signal=39%	510315/286811/530688/512048/507155/513405/520351/618429/514267/112448582/404165/505846/768075/360191/507410/617906/521240/507369/282420/540772/538548/507132/540168/538915/511723/512692/540457/782674/510568/531274/517417/535163/515001/614984/525619/532864/514336/513043/514945/614870/508270/514870/511306/505324/505600/617204/516289/515057
bta04910	Insulin signaling pathway	133	0.364644	2.1477	2.69517e-05	0.000286905	0.000194931	1180	tags=20%, list=6%, signal=19%	327664/784877/100336808/511783/786335/540682/520277/514066/511961/521196/512665/788926/520454/282359/513859/786886/100139988/539466/510434/538519/282322/100298939/538954/782160/533171/540421/518180
bta04621	NOD-like receptor signaling pathway	171	-0.323219	-1.8893	2.96791e-05	0.000306066	0.000207949	9227	tags=65%, list=48%, signal=34%	327715/508105/280943/534125/508029/281112/529660/534492/613667/538639/539780/281020/781710/514214/513924/508888/282167/514386/616010/504400/281043/525408/281214/513939/505101/512480/327672/327712/282152/768054/512486/282291/507664/531391/519958/338472/506759/539513/507432/510080/528166/529195/281985/537631/281111/507427/519754/281536/281832/286814/510814/507055/317697/338039/537201/511531/539974/…
bta04010	MAPK signaling pathway	287	0.273995	1.81066	3.07319e-05	0.000307319	0.000208801	921	tags=13%, list=5%, signal=12%	521616/327703/100337204/781184/509107/528415/785909/282608/540317/790867/512254/286883/533039/282321/326284/528390/539969/519251/506660/512943/615432/521196/286852/507245/541175/786886/281995/788091/615727/510434/519331/538519/282322/281994/100298939/533527/511224
bta04130	SNARE interactions in vesicular transport	32	-0.52103	-2.08091	4.7843e-05	0.000464358	0.000315497	5746	tags=66%, list=30%, signal=46%	507031/519624/507409/519148/539960/780809/788566/616923/513275/532261/614775/506198/511030/780850/507309/509758/614520/510909/510312/616526/613984
bta04720	Long-term potentiation	62	0.45624	2.24462	5.17807e-05	0.000488218	0.000331708	1233	tags=29%, list=6%, signal=27%	530719/767949/509107/520277/525416/790867/282321/521196/286852/532713/510434/282322/100298939/533527/540485/540421/281601/282162
bta03460	Fanconi anemia pathway	51	-0.451809	-2.04944	6.32262e-05	0.000579574	0.000393777	8020	tags=76%, list=42%, signal=44%	507069/527411/616549/504844/613732/534148/541218/513606/353120/615637/522442/614063/615553/618375/527039/512193/507620/783256/523362/537418/515845/526097/618018/618860/513626/540886/516328/516371/515909/510793/100125299/100125287/510858/281762/614512/539681/504869/515662/514749
bta00970	Aminoacyl-tRNA biosynthesis	44	-0.469189	-2.06172	8.22278e-05	0.000733383	0.00049828	5890	tags=64%, list=31%, signal=44%	518874/504609/286855/504824/525350/525894/506305/532903/509429/538772/281476/538357/509624/510075/282060/281576/512531/511740/100847824/615182/100300732/514586/281581/510937/514726/616033/536956/508907
bta01200	Carbon metabolism	107	0.372506	2.09691	0.000124379	0.00108014	0.000733873	693	tags=13%, list=4%, signal=13%	509566/512571/515067/540303/281181/281543/514066/506544/280808/507476/788926/286886/511090/538173
bta00600	Sphingolipid metabolism	54	-0.428975	-1.99037	0.000130421	0.00110356	0.000749788	5694	tags=57%, list=30%, signal=40%	533428/524460/100336736/617172/533103/522515/505097/530776/617707/504545/281433/505554/507207/516881/510620/282407/539223/540732/537972/509018/532742/786974/614165/507290/505514/504468/505558/507188/537087/618571/100336737
bta03030	DNA replication	35	-0.495717	-2.03221	0.000147933	0.00122045	0.000829202	7612	tags=77%, list=40%, signal=46%	613354/504844/515602/510120/539924/512830/515499/508389/616242/518653/504637/506970/617899/514842/281302/504367/534848/281990/514682/517812/785457/540969/537616/514793/100124507/613730/506240
bta03410	Base excision repair	33	-0.504306	-2.02857	0.000168496	0.00135619	0.00092143	5461	tags=73%, list=29%, signal=52%	513458/515499/444987/616242/518653/515343/281630/617899/513051/282691/507426/281990/517825/785457/615359/520497/537616/618306/100124507/505828/613730/616905/535203/511790
bta00511	Other glycan degradation	23	-0.570687	-2.03848	0.000202109	0.001588	0.00107893	4265	tags=57%, list=22%, signal=44%	541086/506184/509522/505554/515729/281909/786974/282272/504468/511345/507188/537087/618571
bta04520	Adherens junction	70	-0.401957	-1.97177	0.000245124	0.00188118	0.00127813	10240	tags=84%, list=54%, signal=39%	540674/280977/505709/782690/536092/505696/281848/515125/539359/107131173/327671/505453/407102/539235/515303/520631/504492/327672/508150/408017/533492/512312/514637/531391/112446776/527263/508658/540248/534360/282420/535376/536759/281440/529146/540481/535742/282637/282382/524770/515187/281577/507837/512072/531488/619066/532712/504856/407217/504482/507632/104968536/507204/280979/505580/404122/53900…
bta05161	Hepatitis B	159	-0.305447	-1.7638	0.000255024	0.00189528	0.0012877	5784	tags=49%, list=30%, signal=34%	537682/112446776/537631/282089/281536/282308/282488/515499/540248/510814/537201/511077/414925/535298/535376/509827/785086/537782/281542/517948/616115/525246/529146/535742/533199/282382/510427/282306/281713/281667/280991/535369/618906/408016/533216/519357/512484/281854/516039/539124/281715/100140945/100137872/513928/535490/508541/788119/281855/615013/286865/327687/541140/282257/353105/539350/10012…
bta05203	Viral carcinogenesis	191	-0.295411	-1.75152	0.000258447	0.00189528	0.0012877	4710	tags=45%, list=25%, signal=34%	509827/513231/785086/540547/785291/533050/281542/517948/404125/616115/281440/533491/100137723/535742/616369/533294/515376/282306/510654/524870/281713/524770/281667/510921/281061/506402/509855/282148/408016/509006/512355/528135/524530/540944/326578/533202/281715/513928/532712/513510/508541/281855/517837/522155/511896/615013/785612/286865/514090/615414/541140/514420/404126/100125591/507481/540666/2…
bta05145	Toxoplasmosis	111	-0.330202	-1.78631	0.000283263	0.0020321	0.00138066	10086	tags=78%, list=53%, signal=37%	282495/511043/508720/100336873/281831/529670/525727/282493/404074/518914/781996/280943/281857/534125/530001/614838/518795/534492/112445051/538700/282535/513478/281020/282494/520030/281534/514386/525408/506387/327672/282876/282152/281237/282291/506214/282387/282530/282497/282490/515621/535043/529939/531391/519958/508619/539241/282491/414346/537631/497017/286849/282089/281536/530599/510814/537201/2…
bta03060	Protein export	23	-0.557809	-1.99248	0.000339317	0.00238244	0.00161869	3884	tags=57%, list=20%, signal=45%	281504/514960/767917/614017/504842/509430/538938/541040/786732/506986/415113/282078/505064
bta04071	Sphingolipid signaling pathway	117	-0.334032	-1.83771	0.00037395	0.00257091	0.00174674	5766	tags=55%, list=30%, signal=38%	281985/538896/537631/527263/100336736/282308/287024/533103/535321/522515/505097/287026/281542/517948/616115/281440/507041/514554/530776/533199/281791/282306/280991/533147/618906/539123/536654/512355/100138150/505611/282320/100137872/619066/281790/516881/100134966/533788/506783/510620/515159/539223/286865/540732/541140/517533/282527/537972/509018/524361/282883/505757/506322/522159/785911/614165/50…
bta05169	Epstein-Barr virus infection	210	-0.270683	-1.63561	0.000447404	0.00297426	0.00202079	10103	tags=65%, list=53%, signal=31%	100296565/618508/282495/515515/512613/513497/525727/515532/282223/282493/507390/521939/781996/508105/280943/533459/538276/616942/534125/504531/281874/407126/529660/534492/615107/281839/534996/538700/282535/514813/280955/617024/281020/282494/506087/281534/525408/510417/100337091/281057/407173/534057/282291/506214/541218/282530/282307/282497/282490/524959/512672/505463/519958/618405/539241/781150/2…
bta04062	Chemokine signaling pathway	183	-0.2878	-1.6937	0.000450646	0.00297426	0.00202079	9104	tags=65%, list=48%, signal=34%	281735/538276/530001/504531/614838/281863/497018/282325/533455/615107/613667/534996/407771/788151/408019/281797/282136/516133/281603/505740/281796/508888/618470/541008/281043/282682/525408/282323/281214/287018/408018/327672/327712/100337091/536051/529196/519716/282291/281203/282307/407772/515621/516104/281345/531391/506807/521413/535530/537682/281985/497017/512489/511671/789148/511112/539108/2823…
bta04925	Aldosterone synthesis and secretion	92	0.358547	1.94377	0.000627668	0.00406138	0.00275941	1233	tags=18%, list=6%, signal=17%	530719/537960/100337204/509107/520277/515161/525416/528390/510026/532713/540245/517688/282322/525482/613800/281601/282162
bta01230	Biosynthesis of amino acids	70	0.394216	2.01751	0.000650822	0.00413021	0.00280617	651	tags=13%, list=3%, signal=12%	509566/512571/515067/540303/281181/281543/506544/507476/286886
bta04911	Insulin secretion	82	0.367004	1.94451	0.000695944	0.00433324	0.00294411	1233	tags=18%, list=6%, signal=17%	530719/537960/100337204/509107/515161/532060/525416/510026/532713/534180/282322/525482/281601/408008/282162
bta04971	Gastric acid secretion	71	0.384985	1.97744	0.000775997	0.00474221	0.00322198	888	tags=17%, list=5%, signal=16%	530719/533378/537960/520277/515161/525416/510026/532713/280800/518025/282322/525482
bta03420	Nucleotide excision repair	44	-0.427012	-1.87638	0.000824173	0.00494504	0.00335979	5331	tags=64%, list=28%, signal=46%	515499/508389/522908/518653/504637/507984/100137723/617899/514842/515462/509602/519357/281990/537958/516371/513510/511896/785457/539668/615512/537616/524274/511951/511829/100124507/613730/508601/100125238
bta05222	Small cell lung cancer	91	-0.338553	-1.76641	0.00094118	0.00551078	0.00374416	10988	tags=81%, list=58%, signal=35%	281073/281872/508490/534712/512915/541184/515011/538436/692183/511043/512613/317711/100336873/513497/529670/518914/781996/781568/527124/504531/617024/280794/281020/520030/514386/506387/282876/282152/282291/511602/541218/282307/535043/505463/529939/618405/281875/519018/282308/530599/506270/511077/537782/281542/517948/616115/281647/281876/282306/280991/535369/767985/408016/519357/281854/512355/5245…
bta05163	Human cytomegalovirus infection	221	-0.266435	-1.6248	0.000961166	0.00551078	0.00374416	5784	tags=48%, list=30%, signal=34%	537682/281985/282330/497017/507359/282308/515640/282488/317697/535603/506270/537201/280729/783680/511812/511077/513340/535298/533661/509827/785086/513377/287026/533050/281542/517948/100297344/616115/281440/100139219/281788/404181/535742/616369/527550/533199/281791/282306/282642/281713/613811/525962/280991/504288/535369/326597/618906/281879/408016/540741/509006/536654/286850/281854/512355/524530/5…
bta00563	Glycosylphosphatidylinositol (GPI)-anchor biosynthesis	25	-0.51819	-1.90636	0.000968561	0.00551078	0.00374416	5279	tags=68%, list=28%, signal=49%	768015/513395/504677/519213/100139601/504583/783989/511496/507080/525095/508700/509680/504724/768052/535138/506830/523737
bta04080	Neuroactive ligand-receptor interaction	322	0.235938	1.59224	0.00102293	0.00572146	0.00388731	1075	tags=8%, list=6%, signal=8%	281716/338070/539128/613317/790333/282179/281963/507053/112441549/540519/112444892/281688/280728/618262/281687/281191/524064/528699/281553/281689/532277/338035/528416/530065/281371/509493/282237
bta01524	Platinum drug resistance	74	-0.36643	-1.82805	0.00116671	0.00639631	0.00434582	10427	tags=78%, list=55%, signal=36%	507346/520925/505709/518075/513497/281805/785216/781996/521685/616744/533652/777644/504531/100296226/281020/533115/407111/514386/516190/327672/282152/506093/615552/282307/513606/353120/615637/531391/517724/540526/541275/282308/282488/787696/414925/537782/281542/517948/281647/616369/526824/282306/280991/518976/408016/537958/100140945/100137872/282097/493719/615013/286865/514090/507481/537380/28073…
bta05031	Amphetamine addiction	64	0.384131	1.90845	0.00118235	0.00639631	0.00434582	920	tags=16%, list=5%, signal=15%	530719/509107/520277/525416/790867/282321/286852/532713/282322/533527
bta00051	Fructose and mannose metabolism	33	0.477299	2.04292	0.00121597	0.00647212	0.00439733	520	tags=21%, list=3%, signal=21%	509566/534928/281543/514066/506544/407183/788926
bta04622	RIG-I-like receptor signaling pathway	74	-0.365844	-1.82512	0.00124956	0.00654529	0.00444704	4965	tags=43%, list=26%, signal=32%	539974/533661/536421/616115/529146/767903/519541/506848/618906/533216/510923/281854/512355/539124/535490/281855/539145/100125591/532686/507481/506182/533141/508378/504760/504727/504707/523962/508233/516979/281871/767932/493720
bta01521	EGFR tyrosine kinase inhibitor resistance	78	-0.352992	-1.77617	0.00149889	0.00772866	0.00525105	7513	tags=64%, list=39%, signal=39%	327672/100337091/282152/536051/282307/282002/281361/531391/527165/504526/516598/535530/537682/525931/507359/282308/281161/537201/404193/281769/535298/517948/100139219/525246/404181/535742/540085/533199/282306/787914/280991/519920/407170/100137872/790875/407217/613787/508541/615013/286865/541140/281987/280877/507196/785655/506322/282879/540786/280730/614570
bta05165	Human papillomavirus infection	316	-0.24142	-1.53841	0.00167635	0.00851071	0.0057824	8237	tags=57%, list=43%, signal=33%	515303/538619/280794/538720/493729/338092/280958/530005/407111/520030/511976/280873/514561/282323/506387/510417/327672/407173/536993/505242/538609/281873/287017/514031/518884/511602/781865/504985/281641/789485/282307/445418/617638/535043/445419/512672/785423/529939/531391/527165/789216/281530/505267/538536/506995/540664/445420/281875/537682/508008/112446776/506618/515680/282308/539203/282488/5305…
bta04115	p53 signaling pathway	76	-0.349101	-1.74102	0.00231032	0.0115516	0.00784847	5682	tags=50%, list=30%, signal=35%	515914/614920/282488/508167/327679/540547/104968444/537782/519896/538512/281542/616369/526824/281668/617931/281061/509863/282261/408016/519357/524530/616861/100140945/615414/507481/100137737/518897/532527/519217/504869/784541/507901/508875/511754/540786/280730/510618/510373
bta05135	Yersinia infection	141	-0.290714	-1.64892	0.00245959	0.0121144	0.00823085	7792	tags=59%, list=41%, signal=35%	541008/281043/530401/535225/512480/327672/535347/508819/282291/281873/616969/508361/282307/540304/531391/519958/524352/529195/537631/538559/100125224/519754/516048/281536/282308/526227/506270/513377/533908/517948/616115/282846/281440/529146/535742/527550/533199/281876/510427/282306/280991/616545/326600/281577/618906/509821/507837/536654/281854/516039/512355/539124/540838/100137872/281597/619066/7…
bta05170	Human immunodeficiency virus 1 infection	212	-0.258679	-1.56535	0.00251884	0.0122238	0.00830514	5723	tags=45%, list=30%, signal=32%	537631/497017/504310/281536/282308/282488/317697/506270/280729/783680/511812/507731/513340/100298356/533661/327679/506192/108771180/533050/517948/100297344/616115/281440/100139219/281788/529146/404181/533199/526824/281791/282306/281668/616331/525962/280991/281061/326597/618906/281879/785711/408016/509006/536654/286850/281854/516039/512355/513673/539124/782472/100140945/100137872/504335/619066/281…
bta04140	Autophagy - animal	142	-0.283745	-1.61173	0.00281733	0.0134742	0.0091547	4411	tags=40%, list=23%, signal=31%	517948/281105/100139219/505708/529146/404181/540873/529808/514596/533199/767903/507340/282306/280991/534126/512685/282691/508631/517263/539124/787967/617367/282320/100137872/534155/529148/527278/508354/615013/506754/782743/514547/286865/281897/112442685/541140/768316/524361/532261/513829/514919/509970/532686/282883/508571/533141/506322/281814/535820/509084/507309/497199/531455/540786/539339/10012…
bta04066	HIF-1 signaling pathway	105	0.310383	1.73879	0.00333777	0.0157352	0.0106909	834	tags=12%, list=4%, signal=12%	530719/509566/540303/281181/281274/506544/525416/507476/407183/788926/532713/510434/538519
bta04912	GnRH signaling pathway	86	0.335455	1.78566	0.00379372	0.0176328	0.0119802	1233	tags=21%, list=6%, signal=20%	530719/100337204/509107/520277/525416/286883/512943/521196/532713/786886/510434/282322/525482/100298939/281601/511779/522921/282162
bta03015	mRNA surveillance pathway	87	-0.330469	-1.70488	0.00430068	0.0197115	0.0133925	6912	tags=59%, list=36%, signal=38%	510604/540982/280796/520351/504925/537131/327689/616181/525143/100296970/534600/516411/787259/535321/783336/282703/783569/529071/504506/516175/100124428/532933/541270/282298/533147/528728/511408/100138150/282320/768231/508491/100134966/533788/506507/101908085/281712/505417/524361/518859/784123/513043/505757/282588/515145/338051/511555/282296/538724/510872/541013/507051
bta05210	Colorectal cancer	87	-0.328609	-1.69529	0.00462939	0.0209274	0.0142186	10273	tags=77%, list=54%, signal=36%	533233/782690/537176/513497/515125/538751/507390/781996/616744/327671/533652/534125/504531/100296226/515303/281020/533115/100295476/327672/536051/541218/282307/505463/531391/618405/538477/540526/537682/513723/537631/282089/282308/540248/526572/511077/414925/535298/535376/281542/517948/281440/100139219/511619/404181/540481/533199/282382/282306/516010/280991/408016/519357/524530/100140945/100137872…
bta03022	Basal transcription factors	42	-0.400982	-1.73832	0.00506534	0.0224722	0.0152682	5677	tags=57%, list=30%, signal=40%	531109/781912/516578/513231/785085/507984/100137723/516001/514443/534669/510921/515462/518030/539938/532936/513510/511896/785612/536067/505702/615512/511829/613818/100125238
bta04215	Apoptosis - multiple species	34	-0.42321	-1.72862	0.00510731	0.0224722	0.0152682	4897	tags=76%, list=26%, signal=57%	507390/781996/538801/534125/100296226/281020/514386/282152/537631/414925/537782/281647/504851/408016/493999/100140945/534211/527278/514090/282527/507481/526279/523039/280730/493720/510373
bta04612	Antigen processing and presentation	78	-0.332967	-1.67541	0.00538944	0.0234015	0.0158996	10582	tags=87%, list=55%, signal=39%	281060/618565/100140174/100848815/100852061/508633/281108/100300510/493736/282498/514897/100296565/282495/508720/513869/281831/525727/282493/407098/444877/280943/616942/538700/282535/282494/536558/510417/327711/407173/281237/515200/506214/282530/282497/282490/524959/539884/512672/613384/539241/100139049/281281/615930/282491/281832/280729/783680/281827/533050/282860/509857/540190/281105/281713/100…
bta05167	Kaposi sarcoma-associated herpesvirus infection	192	-0.260327	-1.54807	0.00574737	0.0246316	0.0167353	5412	tags=44%, list=28%, signal=32%	282308/282488/281161/510814/317697/534815/537201/511812/511077/513340/527410/533051/533050/281542/517948/100297344/616115/281440/100139219/525246/286839/540481/535742/533199/510427/282306/281713/525962/280991/535369/326597/618906/281879/509855/408016/533216/512484/509006/286850/281854/512355/524530/100140945/100137872/527278/790875/613930/508541/788119/281855/522155/112443864/514547/286865/514090…
bta04064	NF-kappa B signaling pathway	106	-0.299216	-1.60707	0.00599754	0.0253742	0.0172399	10103	tags=73%, list=53%, signal=34%	100296565/515515/282151/281212/514978/518089/523360/508105/280943/533459/539235/282325/112445051/613667/281839/534996/282118/281020/281408/514386/281214/535188/100337091/282152/530884/282291/505521/515377/282387/281048/286764/505463/519958/618405/504994/286849/510393/613947/281536/511112/515640/504507/282420/509167/536421/616115/281647/529146/526824/510427/515573/613811/613753/534722/510923/28185…
bta03013	Nucleocytoplasmic transport	103	-0.310814	-1.65906	0.00631482	0.0263784	0.0179221	6619	tags=56%, list=35%, signal=37%	513270/538236/507478/520351/511248/518768/616181/616114/510250/504716/506836/100296970/534600/520924/506561/510004/787259/510540/614879/767620/783596/100124498/504506/100124428/523408/515573/100125940/532933/100337114/504823/286807/614694/540457/510568/507738/112446383/100299503/784219/505417/504786/504307/512530/524528/529231/535264/510797/100139154/784123/540111/513043/513080/513592/515145/5045…
bta00030	Pentose phosphate pathway	28	0.466912	1.92428	0.00679316	0.0280218	0.0190387	350	tags=18%, list=2%, signal=18%	534402/509566/514066/506544/280808
bta03440	Homologous recombination	41	-0.378286	-1.62315	0.00899716	0.0362228	0.0246107	8076	tags=73%, list=42%, signal=42%	788127/507069/527411/504844/534148/615896/353120/768244/540574/530961/507620/783256/519513/100140639/522943/504796/537418/526824/617899/508607/281990/540886/100125299/533414/529507/525093/789410/537616/514749/617007
bta05213	Endometrial cancer	57	-0.346923	-1.62724	0.00900081	0.0362228	0.0246107	6774	tags=61%, list=35%, signal=40%	541218/282307/505463/531391/618405/535530/537682/540207/282308/526572/511077/535298/281542/517948/511619/540481/533199/282637/282306/280991/519357/524530/100140945/100137872/790875/407217/615013/286865/514090/541140/539003/506322/540786/526848/280730
bta04024	cAMP signaling pathway	220	0.233683	1.49081	0.00931595	0.0370393	0.0251655	990	tags=10%, list=5%, signal=9%	524624/530719/518117/281716/537960/100337204/520277/515161/525416/512222/510026/521196/281553/532713/540568/510434/517688/282322/525482/511224/281371
bta05132	Salmonella infection	249	-0.236712	-1.46179	0.00968763	0.0380586	0.025858	5827	tags=48%, list=31%, signal=34%	507215/540381/523424/504244/510330/527701/537631/768062/533307/507427/538559/281536/281832/540619/507311/100141038/616366/338039/534815/282689/404053/511077/534206/518781/281165/537790/407237/104968444/613533/517948/511083/616115/282846/281440/529146/540481/782966/533199/508874/505568/282306/506218/280991/280950/519789/326600/281577/538366/613753/618906/100295973/767874/783375/408016/509821/28185…
bta04668	TNF signaling pathway	114	-0.283648	-1.54673	0.0100635	0.03907	0.0265452	9192	tags=67%, list=48%, signal=35%	521987/508105/281735/280943/282871/534125/504531/534492/615107/613667/281839/535622/281137/282118/514386/281043/281214/281309/327672/327712/282291/541268/282307/531391/519958/407221/789216/338033/523746/537631/281094/508608/507427/282308/282488/531942/281915/504408/509827/785086/540892/517948/616115/529146/533199/282306/444867/281713/508431/280991/618906/408016/281854/516039/512355/540944/281715/…
bta03250	Viral life cycle - HIV-1	61	-0.341262	-1.63179	0.0104658	0.0401202	0.0272587	9559	tags=72%, list=50%, signal=36%	407098/618737/782605/785768/505453/281374/524683/506578/280873/507162/789389/510596/282011/513270/504925/519808/616948/407194/533406/112446776/497017/100298356/511582/108771180/511751/504458/527829/541306/521089/520580/540457/768231/616425/512799/510568/112441507/514420/504658/540158/613647/539357/280872/281418/511861
bta05220	Chronic myeloid leukemia	76	-0.320601	-1.59889	0.0105772	0.0401202	0.0272587	7513	tags=62%, list=39%, signal=38%	327672/282152/536051/282291/541218/282307/505463/531391/529631/618405/537682/282089/282308/540248/511077/535298/535376/281542/517948/616115/533590/527418/616369/533199/282382/282306/280991/535369/519357/281854/524530/100137872/789892/281855/532209/615013/286865/514090/541140/404126/507196/506322/512841/511754/508233/280730/510618
bta04146	Peroxisome	81	-0.314481	-1.59504	0.0112429	0.042161	0.0286453	10233	tags=73%, list=54%, signal=34%	317658/537878/618791/617491/535727/509102/525262/540376/512676/507431/513533/617037/101904810/768256/281360/505792/540337/508324/526059/281092/534380/281495/282876/513996/280960/506631/511716/507393/508918/506059/617720/281997/536628/514159/515608/510065/100138312/493643/282885/515730/506518/533077/504360/512341/505771/613679/281235/506527/613498/504826/506007/785361/617160/534944/510447/282639/5…
bta04070	Phosphatidylinositol signaling system	93	-0.300573	-1.57522	0.0119907	0.0442658	0.0300753	6824	tags=59%, list=36%, signal=38%	780855/282307/282002/518523/511124/537171/534051/281985/535487/100125224/282308/317697/540877/534815/506349/282087/537790/287026/790873/517948/100297344/518488/100336936/518435/506348/514596/282309/536810/282306/534793/539889/532797/326597/281879/538147/538291/508236/615135/782743/286865/507860/281987/518371/614834/281865/521790/540005/515135/534029/281878/530577/615813/615077/540786/281869
bta04145	Phagosome	158	-0.256675	-1.48045	0.0120725	0.0442658	0.0300753	8450	tags=61%, list=44%, signal=34%	615087/538700/282535/281877/282494/504741/338092/513266/407124/281534/787578/317777/535605/537748/510417/327711/281555/407173/281873/287017/515200/281311/282346/281641/506214/100141266/112443216/282530/282497/281368/282490/524959/281048/512672/281345/282229/281530/539241/281346/281875/282491/782652/504244/510330/507031/533307/281111/516259/281536/534815/404053/534206/407237/511582/533050/790873/2…
